# Supplementary material for: A Novel Extracellular Metallopeptidase Domain Shared by Animal Host-Associated Mutualistic and Pathogenic Microbes
Source: PLoS One. 2012 Jan 27;7(1):e30287. doi: 10.1371/journal.pone.0030287 (PMC3267712; doi:10.1371/journal.pone.0030287)
Supplement: Figure S2 — Initial protein alignment corresponding to the new M60-like domain, 27 sequences with 206 aligned sites. The specie names are abbreviated with the first three letters of the genus and species names along the corresponding protein sequence GenBank GI number. The query sequence used for the PSI-Blast is shown on the top with the RefSeq accession number. Format: text file with sequences in fasta format to be open in a sequence alignment editor such as SEAVIEW. (FAS) [file pone.0030287.s002.fas]

>Tri_vag_xp_001313628/1-186 no comment
AWPYGGNLDL--VTYQDEFPLGFEVNISG--GIRMPHFIYGVNTDEEWETDLRKLA--AP
LT-TFDTGTFLARMPTHNIRGA----VCVNDGMRFWQTVSWNS--YDVNEVTSVNRR-DG
NVIRPLFYNFDSYVPAGAAVAFVGGNFIQAP-PSWAGGIVNYDSAK-WGCWGLLHEYHHH
FQS-G-W-GF-ANPGEVTNNVLNLID
>Tri_vag_154421792/1-187 no comment
MWPYGGTIEF--AVSLDTFNAGVDVNVTG--AIRSPYFIYGVTTDEEWEEEVSKYP--GP
IL-SLDYGAGFVAVPSKFVRSY----VKLNDAMAFWRSVSRVL--YSCSEVSAVPRRSDG
RVRTPLRTTVDRFVRVGTAVALTGGNQVYEP-IGWQREWTNYDYAK-WGCWGQLHEYAHH
FQN-G-W-EF-GAWGEVSNNVLNLIS
>Tri_vag_123975108/1-188 no comment
GYPLGGYMDI-KCWIDTFPLHSVEINITG--GIRIPYFRYGAESDQDWEEETRNYV--AP
LT-FYDTGNVKCIFPSTFSRNQ----IRMSDAGAFWRTVGRVM--YSVNEVTNYDRRKDG
RIKTAMWFNFDSYVPAGAAVAFVGANFIQAP-FSWSTAMINYEGAK-WGCWGNVHEYGHH
FQS-G-W-GI-SGTGETTNNVINFIT
>Tri_vag_123414477/1-191 no comment
AWPYGGSLEL--RYDIDKFTFGLPIKISG--CVKMPTLIYGRDSEEDYMNEIRYLK--AP
VT-VFDTGNLKITMPSKLARNP----NRLYDTLHFWQGAGRVL--YSFNEVQGMPRRSDG
RVKVPVQFNIDRYVSHGLAYCQQGSYYIQAP-TGFAGAFTDFESVFSDGCWGPIHEYAHN
FQQNWGF-GWFYSYSEITVNVPNYIS
>Cht_fla_196234345/1-179 no comment
ANPFGGLIYI--EVPDKLTAAKVNVAISG--GVESPRFVLGETKLLEWKMRLRMAP--AP
WA-ELETKKVILSVPSEKIRQL----DDPEALLKFWDQILDAE--ADLATIPHERKRPE-
------RIVPDVQISAG-YMHSG-YPIMTPL-DKSVEHSLSLVEMK-QGSWGHFHELGHN
HQV-GDW-TF-DGTVEVTCNLFSLYC
>Dan_rer_189528486/1-180 no comment
CNLWGGLIYF--VAPPESKVDGVEIVVQT--AVQAPYFKSGETSVADWVGKIRQRP--AP
WA-ELEFENLVMTLPSDFIRNL----ERPDQVAKLWDAIMRSV--SDLAATPAKFPRKE-
------RFVGDVQISAG-FMHSG-YPIMMLS--SSASELLNVKEAHKHDFWGPLHKLGHN
QQR-KVW-EFPPHTTECTCNLWSVYV
>Equ_cab_194210033/1-180 no comment
TCLWGGLLYI--IVPQSSKLGSVPVTVKG--AVHAPYYKLGETSQEEWKRRIQEHP--GP
WG-ELATDNIILTVPTANLRTL----ENPEPLLRLWDEVMQAV--ARLGAEPFPLRLPQ-
------RIVADVQISVG-WMHAG-YPIMCHL--ESVQELINEKLIRTKGLWGPVHELGRN
QQR-QEW-EFPPHTTEATCNLWCVYV
>Pla_lim_229539192/1-180 no comment
GNAYGGLIYV--VVPQKTPAGKFEVEFSN--VVDAPYFVHGETDISDWRFTIRNYP--AP
WA-ELETRHLVITVPSELVRKL----DFPDKLMNHWAAVLDAC--ADLYSISRNRPYAE-
------RFVFDDQISAG-FMHSG-YPIMCFT-NPSAPEVVDLNFLENKGGWGFYHELGHN
HQK-GDW-TF-QGTGEVTNNLTPLYV
>Geo_sp._261408468/1-186 no comment
NSPYGGLIYL--IPLKAKNDFRATVKISG--AVEAPYYVLGKTTLEEWE-RIRTGPVTVP
FA-ELQGERIILTVPSDLIRQV----ADPEELMRTWDEIYDSY--DELVGLDPDRAMPHT
AHQLNRRYVADGQISSG-AMHAG-YPIMLPF--SYAANLLDVHYVK-TSAWGFWHELGHE
YQQ-RTW-TW-SDVGEVTVNLFSLYT
>Geo_sp._261408464/1-186 no comment
RSPYGGLIYL--IPTKPQPSVAKDVEISG--GVRAPYYILGETSPSEWEDAIRHHP--AP
WA-ELQGRRVILTLPSEYIRQL----EDPQQLVEKWDAIVDYT--EEVAGLSPDQQLPHK
SIDLPFRYVADRQISAG-YMHAG-YPIMFHI-DPSAGHAVDISRVT-QGGWGFWHETGHE
YQQ-GAW-NW-NVTGEITVNIYSLYV
>Akk_muc_187736004/1-182 no comment
VNPMGGLVYV-NVGQRPRRGKVFKVQISG--AVPSPLFVMGKTTPEQWAEQLENTK--AP
WG-EIRMPRLIVTMPVEQLKQC----PDVQKTAEFLQKNMALQ--DWIMGWDTKPDRLH-
---HPMRFVVDRQISAG-AGHSG-YPAMATK--DWTNSIATGSIIH-SGSWGLWHELGHN
HQS-PPF-TM-EGQTEVSVNIFSMVC
>Bac_wei_163942780/1-190 no comment
SSPRGGILYF---YNMNNEGEVTASVTNG--GSHFPLFILGKHTKKDWDEMLKKYK--DP
YAVELKGERSLITTTYDSVQKYM-KNTDPTELMKLHDKIIRLE--NAVAGLSEDGVGVAK
SPTHYVQFVEKRKPAEGNFMFAT-NYHTGYI-PTAMNRVLDLEVLE-KDGWGPWHEVGHL
HQQ-EPW-KW-SKVREVTVNIYSLAV
>Bac_cer_229175758/1-188 no comment
SSPNGGLLYF---YNYHNTGEVVAKVKKG--GTPNPLFILGKHTTEDWKRMLAENP--DP
YAIEMKGENSLLTMHPETVAEHL-KQEDPAALLKKHDEIINIE--HKISGLSKDGAGVAN
QGKHSIHFVEDWYTDN--YMYAT-YYRTAYS-KGNLESVLNLEELT-NDGWGPWHEVGHQ
HQQ-DTW-LW-DGLGEVTVNIYSLAV
>Bac_cyt_152977134/1-188 no comment
SAPKGGMLYF---ENANLNGETKVTVSSG--GTPIPYFELGKHTKEDWDAMLEKFP--NA
YAVELKGERSLFTVTYKAAKQYL-GGKDPSPLLRKHDEAIRIQ--DKVSGVSEEYTGVAQ
ADTHYVHFVEDFNKKDG-WMYAT-NYRTGYV-SDAMKYVLDLEHFE-KDGWGPWHEAGHQ
RQQ--TW-KW-SGLTEVTVNIYSMAV
>Yer_ent_123443045/1-189 no comment
EVENTGPLYF-VATNQPGSSEITVNLLEG--GKPMPRFILGENTAEDWQAQLVKFG-DAP
FA-ELVGKRMILTMPIADMREK---ATDPEGVLVLWDRIVSLA--EEQFGLSAKRAFPHR
ATPFQYQFVSKPDSTPG-YMSAA-NYWLGSN-ASGIAEVINTDKLQ-NEGWGPWHELGHH
YQM-PAW-TF-NGNTEVTVNLTSLYV
>Chi_pin_256421564/1-181 no comment
YSPFGGLLQL--NVSDTTTLKEITITVTG--VVKAPYFKLGQTSEASWINSIRNNP--AP
WA-ELATDKIILTVPAYRIRQL----DNPVKLMQFWNEVMDAD--ADLARISRIRSHPE-
------RVVVDQDVAYG-YMYTA-PERIIVPDDQSCALMLDESQVRANGSWGLFHELGHR
HQF-WGI-DF-GELQEVTVNLFTMHV
>Bac_sp._253564886/1-182 no comment
--RNKGLMYILYHTPDYETAQPVKIHIAS--GQVNGYFDVAKHQASDWNKLLSNAV--DK
YF-DVVGHYAHLTFPTERFRTH---TTDGKALIDAYDQIVNSE--MELMGLYKYNKLFK-
------NRMYLHVMYTS-YMYAT-SYHTAYN-DGTLAELCNVDKLKTSACWGPAHEIGHC
NQT-RPGLKW-LGTTEVTNNIMSEYI
>Pse_syr_237801423/1-184 no comment
DVPESGLLSF----IYQEAGKSVPITIKGD-YSYVPAFTLKETTNAMWQARMAQYN-NAP
VV-MLTSERAIIIVRYESARLY---ITDPEKLMAYYDEVIRSQ--DDISGALGEGETEWA
IDP---NKHFHVEADTG-YMFAA-DGHMGYS--GAVALRYLLSGNIAEERWGPWHESGHQ
RQI-DPM-TW-AGMTEVTVNIYSLAT
>Sph_spi_227540167/1-191 no comment
RNLYGGLVYI---IPERPLGRVVDLLFSG--TTLAPSFKLGKMTDQQWKDLVNKSS--VP
WF-ELEGNRIVFTLQTERLKRF--PINSPTELMELWDKMIKEAYWDWTGMTEGNPDVKHR
APFNKWRIVHDVLFEPGVAQVSG-YPVRAGANDQYFGQAVTINSVR-TQNWGTYHELGHN
MQQGRVW-SF-DGNGEVTNNLFSFK-
>Asp_ory_169782936/1-192 no comment
VHNFGGIIYIRYTHRASDQPPPPVFLRLGDTAEPFPLFREGSTTDAQWKSMLDVTK--VP
FA-EHDGKRVIITGLAKHAKKYADNGQRQQELLDTYAHIIAIQ--DRFSALKYNARDPRD
RPSLL-RPMVVESVNSG-VATAT-NYRAAIP-NRLSDQIYWVPRLR--NSWMVFHELGHQ
RQITRTW-SW-RAMTEVTVNIYSLA-
>Lis_gra_229555955/1-188 no comment
-NFSGGMVYL----VNYSTTKAENVAIKG--GVKVPYYVQGKTSIDSFKNELEQYK-DVP
FM-EFVNNDAIATIRIDRAKDIFEKGNQVDVFMSSLAKIVKLQ--NGAAGLSYDGQGAER
KDLQR-IHVMNPEWGAG-QLFAT-NNFIGIH-SATTKDREIFSKGLDSTDWGMLHESGHT
YQN-KMY-QW-RNMTEVTVNIYADYA
>Bra_fae_257068157/1-190 no comment
SDAHGGVIYL--SFPGADGAATATVSFGAA-AEPMATFVRGTTAEAEFQAQLDRSS--AP
FA-ELVSTHAIVTVERDRLLLF--RHEDHEKLLGILDRVVEIE--QETAGYTTEGGVESR
PPSGPHHLVGYPDGIEGVGAYAT-NGYTAYP-PPIQSTLLTVSGLT-LDGWGPYHELGHH
HQQ-EPV-NP-GDVVEVTVNIFSLAV
>Bac_cac_153807218/1-181 no comment
---KAGNVYVDYFADDPDTAPAVTIHFVT--GKVNGYFDATVQSNEDWNRLLDNAV--SP
VM-DVKGKYIQLAYPVEQLKKL--TYGKGKELAENYDKVMQVQ--YDFSGATKYNRIPKK
RILARVNFNY--------FMFRD-GDGVAFE--GTDGTMKAAIGPEVTTNWGIHHEIGHV
MQM-RPWLTW-GGMTEVSNNLFSMYG
>Sph_spi_227537631/1-182 no comment
--ENKGNSYIQYFTPDKAGNNKVKIHILS--GKVNGVFDISKHTNKDWDNLLANAT--AP
VL-DIVGKQVQLAYAVQSLQTS--AAHQGVELVKLYDSIIGIQ--HELMGLKQTNRIPK-
------NRMFGRVIWKG-FMHAD-GIGAAFH-NNTMKDVASVAGLR-KNSWGVAHEFGHV
NQV-RPNMKW-VGTTEVTNNIYSVWT
>Akk_muc_187736481/1-182 no comment
--KNKGLGYIEYFTPNYKKAPKVHLSILS--GKVNGVFVGGVSKNSDWKKMLENSP--TE
VV-DIVGSRVHLVYPVEELKQF--CPDKGEELIALYDRIIGME--QQIMGLYKYRMLPK-
------NRMFGRVIWNG-FMHAD-GTGAAFH-NGTMKEVGNPDRIP-GSAWGIAHEFGHV
NQV-RPAMKW-VSTGEVTNNIYSAYV
>Bac_cac_153807502/1-181 no comment
--AHGGLSYIEYYTPNWKTAPALKLHIAS--GKVNGYYDKHRDVSADWREILNKAT--YG
CI-DIKGDRVNLVFGVNSIKTY---CDNLGKLIQNYDDIVELE--HELMGLDKWGRRPK-
------NHMFARVTKDG--LFAD-GWGAGWY-EGCMNELASTTKSLREGVWAIAHEFGHV
NQI-RPGLKW-VSTTEVTNNVYSVCA
>Bac_cac_153807099/1-180 no comment
--PHKGLVYVSYYVKDCRKAPEQKLTFHT--GINNGVFNAYQHTNDEWKRMLDSAI--AE
VI-DMQGKYVHLTFDVKTLREK--GSDCGVEMIRMYDRIILWQ--QEMLGIDQFGYRTN-
------NHMFARISWAG-PPNAN-GKGVSFP---RTSSIIRPEDIR-NSNWVIGHEFGHV
NQV-RPGLKW-HGTTEITNNIQAAWI
