# Supplementary material for: A Novel Extracellular Metallopeptidase Domain Shared by Animal Host-Associated Mutualistic and Pathogenic Microbes
Source: PLoS One. 2012 Jan 27;7(1):e30287. doi: 10.1371/journal.pone.0030287 (PMC3267712; doi:10.1371/journal.pone.0030287)
Supplement: Figure S3 — Pfam seed alignment for the new M60-like domain, accession PF13402, consisting of 68 sequences with 387 aligned sites. The UniProt accession number for each sequence is provided along with the position of the start and end of the aligned segments. Format: text file with sequences in fasta format to be open in a sequence alignment editor such as SEAVIEW. (FAS) [file pone.0030287.s003.fas]

>Q5E705_VIBF1/1109-1410/Q5E705 no comment
GSRQ-SAGVWIPAREVAYVH----GLSSDDTVMIAMADNLTGRVNHE-----MALNRPPR
VSMSFN----GVEASNGFKV-PYGGSVYIT-----LGSKE------SAQVSFGGSAIAAP
MFMMTSATE-GSWITTPEESD-APITEIVGKRFSYTT-TTAGIKGHSE---VDVLEMTKQ
FDLFTIGVN-EFYGRDGVSGAHKMFTDSAPELEYQNMRLVDDIQIS-IGSAH-SGYPVMS
TSFPR--QKSSLFKA-T-----DNWMLGHEIGHNQAAN-WLNVV---G-AGETANNVLAL
YTQERN----T-GDMPR----------IKVSI-----TNATEW--ANGDHPWA-------
--------DGTNADRLNFFGQLKLWAE
>D0YX39_LISDA/1086-1383/D0YX39 no comment
NNMQ-STGLWAHQHQQVQVSG-----GVPATITVSLIDDLTGLEQHE-----VALNRPPR
VQKSFN----YDGSNLSFRV-PYGGLIYIKP---HSNIEG------TAEFSFSG-VATAA
FW----K-D-NQWMY-GKASD-VPLAEIDTGHVIYTT-PVENIEQ------QDIQIFVDE
MNKFANSAS-DFYGRDEVVSVGKHRRFTYQDLADHRHRFVNDIQIS-IGAAH-SGYPVQS
TTY----NKGNKIPT-TPT---NDWLLWHEIGHNLASA-PFSMT---G-GTEVTNNILAL
YMQEQRP-EPN-NKMSR----------VESDI-----QKMPLLFSRYNKHVWS-------
--------NGDAGIRLVMFAQLKLWAE
>A2PNQ0_VIBCH/1045-1345/A2PNQ0 no comment
GSRQ-PTGLWAPQLQDVTVTG-----GAPATITVALVDDLTGRDNHE-----KNLKRPPR
VQKSWE----YDGHSLTFKV-PYGGLIYITPRGGSYNENS------KLTYSFSN-VLKAS
YW----K-D-GQWVH-GYNES-VPLAEIDTGHFIYTT-PVKNTKN------QDLVQFSEQ
MNIFAESAS-DFYGRDETTSNGKHRRFTYKNLEAHRHHFVNDIQIS-IGDAH-SGYPVQS
NSYS---PTAEKIPT-TPL---NDWLLWHEVGHNLATA-PFVVP---G-STEVTNNILAL
YMQEQR--ADK-PYMER----------VKNDI-----QKIPYWMAKHQGHAWS-------
--------EANANLRLVMFAQLKLWAE
>B9A7W8_VIBPA/1035-1333/B9A7W8 no comment
GNMQ-STGLWAPQLEEVVVSG-----GVKATIHVALVDDLTGRESHE-----LSLRRPPR
VQKSFE----YDGNHLAFKV-PYGGLIYIQPY--HVEEEK------GVTYTFSG-VLKAD
YW----N-N-GKWVN-KSSDG-VPLAEIDTGHFIYTT-PVENTTA------LDVDKFVEE
LNFFAESAS-DFYGRDSKASHSLHQRFTSDALPGFRHRFVNDVQIS-IGAAH-SGYPVQS
STYD---KKATVVPT-KPL---DDWLLWHEVGHNLASA-PFNVV---G-STEVVNNILAL
YMQEKR--EDK-PYMER----------IESDI-----QKSVLWLERYSGHAWS-------
--------EANNNMKLAMFGQLKRWAE
>D0XED6_VIBHA/1041-1339/D0XED6 no comment
GSMQ-STGLWAPQLEEVTISG-----GVKASINVALVDDLTGRANHE-----LSLKRPPR
VQKTFQ----YDGSSLSFKV-PYGGLIYIQPL--EVDSRD------VVTFNFTG-VLRAS
WW----K-E-GAWLN-PINTD-VPLAEIDSGHFVYTT-PVKNVLD------TDVPKFADE
LNAFANHAS-DFYGRDQVAAEGKHRRFTYDALLANRHRFVNDVQIS-IGAAH-SGYPVQS
NSYW---PTWTVVPS-NPT---NDWLLWHEIGHNLAAA-PFMMA---G-STEVTNNILAL
YMQEQR--ESK-PYMDR----------IASDL-----SKSPLWLDRFKGHAWS-------
--------EADVGMRLAMFGQLKLWAE
>B5FBF1_VIBFM/1045-1354/B5FBF1 no comment
GNNQ-STGLWAPQLSEVTVRG-----DVTAMITVMMADDLTGKPQHE-----TSLNRPPR
MQMSFA----HDGRSTTFKV-PYGGLIYIKPTEILSGAST------VAEFSLDG-VEKAA
WWKKDPANNLGEWVNTPDSST-APIAEIDTGSFIYTT-ALNNVKT------ADLNEFSKN
MNRFADAAS-DFYGRDEESADGKHRRFTYPELKEFRHRFVNDVQIS-IGAAH-SGYPVMS
SSFN---ASSNKIPT-NAI---DDWLVWHEVGHNLASA-PFSAP---G-STEVTNNLLAL
YMQELEGRNAN-PEMDR----------IRTSI-----QKAPAWLSSNDGHAWS-------
--------HGDAGLRLVMFGQLKIWAE
>A8H5W9_SHEPA/1007-1304/A8H5W9 no comment
NNMQ-STGLWAVKRSVVTVSG-----NHDATITVALVDDVTGKHEHE-----LSLKRPSR
VQKSWSH---KAGSTTEIIA-PYGGLIYIKPA--STDTAN------RVEFNFSG-VLEAS
LW----K-N-GQWQN-PVNQE-VPLAEVVTGQFVYTT-PVNNVTD------TDIQAFASG
MNDFAEKAS-DFHARDN--SDG-NMRFTGKLLPEHSHRFVNDVQIS-IGAAH-SGYPVMS
TTYN---RDANSIPT-IPD---NDWLLWHEIGHNLAAA-PFNVK---G-ATEVANNLLAL
YMQDLRD-NGD-GQMDR----------VKTDI-----QKAPMMISRDEGHVWS-------
--------HGNAGSRLVMFAQLKVWAQ
>A2PMA3_VIBCH/543-846/A2PMA3-1 no comment
GNRQ-PTGQWAEAHQPFSVSV--SGETSPVTITIALADDLTGREKHE-----LGLKRPPR
MSKSFVIGG-DSPKMQTFTV-PYGGLIYAQGG--NSQQ---------VKLTFSG-TIDAP
LY----I-D-GKWRN-PLLSG-APIGEVVSDTFIFTA-PKANLNADGYL--GGIEQFAKD
LDQFSADLN-DFYARDEGADGDKNRKATDKSMPNNRHHFVNDVAIS-VGAAH-SGYPVMN
DSFI---TSSRSLNT-MPL---NSWLLWHEVGHNSAEA-PFNVD---G-ATEVVNNLLAL
YMQDRH----Q-GKMSR----------VEQDI-----RYAFDFVNAEHGHAWG-------
--------AGGAGERLVMFAQLKEWAE
>A6AAX4_VIBCH/1069-1372/A6AAX4 no comment
GNRQ-ATGQWAQAHVPFTVSV--SGEKAPVTITVALADDLTGREKHE-----VGLKRPPR
MTKSFVIGG-NRATSETITV-PYGGLIYAQGG--DSES---------VQLTFAG-TLAAP
LY----M-G-DRWVN-DINSP-APVGDIVSKSFIYTA-PKANLRAENYS--GGVEQFAKD
LDQFASDLN-DFYARDEGLNGQANRKVTGDENPNSRHHFVNDVAIS-IGAAH-SGYPVMN
SSYN---LNSNNINT-TPL---NDWLLWHEVGHNAAEA-PFVVE---G-ATEVVNNLLAL
YMQDLH----T-GKMTR----------VEQDI-----RVAPEFVQAEHGHAWA-------
--------AGGAAERLVMFAQLKEWAE
>B0TT98_SHEHH/1061-1372/B0TT98 no comment
GNRQ-PTGQWAVAQQSFTVSV--NGSADPVTITVALADDLTGREKHE-----LGLKRPPR
MTQSFTLNSGDIGSSYSLTS-PYGGLIYVQGQ--GSQEGH------NVTLNFTG-SVDAP
LYQYDGK-G-GQWLN-PLDSP-APIGEVISQSFVYTA-AKANLNAANYN--GSPEQFAKE
LDTFAEDMN-NFYSRDEALQGNLNRKATDSSIPTNRHHFVNDIAIS-IGAAH-SGYPVMN
ASFN---AESHNLAL-TPL---NSWLLWHEVGHNAAEA-PFNVD---G-ATEVVNNLLAL
YMQDKH----L-GKMSR----------VEQDI-----RIAPDFVASENGHAWA-------
--------AGGAGERLVMFAQLKEWAE
>D0I5Y8_VIBHO/1018-1321/D0I5Y8 no comment
GNRQ-ATGQWAVAHQPFTVSV--SGNTSPVTVTVGLHDDLTGREKHE-----LALKRPPR
MQKSFTV---DANKHETFTV-PYGGLIYVQGG--GSSN---------VNITFSG-TVDAP
LY--DSK-K-EMWIN-DASSP-APIGDVVSGAFIYSA-PKANLMASNIE--GGIQKFAED
LDTFASDLN-EFYARDEGKDGSKNKSFTHKDRPNNRHAFVNDVAIS-IGAAH-SGYPVMN
GSFN---PNSENIPT-VPL---NDWLIWHEVGHNAAEA-PFTVE---G-ATEVANNLVGL
YMQQKY----L-GYMAR----------VENDI-----RIAPDFVKTENGHAWG-------
--------AGGAGERLVMFAQLKEWAD
>C1HI02_9ESCH/1082-1382/C1HI02 no comment
GNMQ-STGLWAPAQQDVTIK---SSASVPVTVTVALADDLTGREKHE-----VALNRPPR
VTKTYTL---EANGEVTFKV-PYGGLIYIKG---DSKDDV------SANFTFTG-VVKAP
FY----K-D-GEWKN-DLDSP-APLGELESASFVYTT-PKKNLEASNFT--GGVAEFAKD
LDTFASSMN-DFYGRND--EDGKHRMFTYKNLTGHKHRFTNDVQIS-IGDAH-SGYPVMN
SSFS---TNSTTLPT-TPL---NDWLIWHEVGHNAAET-PLNVP---G-ATEVANNVLAL
YMQDRY----L-GKMNR----------VADDI-----TVAPEYLDESNGQAWA-------
--------RGGAGDRLLMYAQLKEWAE
>C2G2G0_9SPHI/88-389/C2G2G0 no comment
TRIL-PTGYYVAPNQSFNINV--NLQQGSTLPKVQVGTHSRNHDYSY-------------
NPPVYN----LSTGSNTITANADGGIIWITYEQPANATAAPGA---SALLSFSGNISRIP
VYIKNSTTL-SNWQNQLLTYNNATDVLMVGQNVYMVY--AKNLHSAVST--QNNDLILNN
ADAVWDNHY-TYAGLNNSSTQHTRPVIP---------HLMVQTEVP-FGLYYAFFYRTAY
ANY----DAHKVFGE-DIV---TNWGVWHEFGHLMQMQ-PIDWD---G-LGEVTVNIFSL
KAERALGITPT-RLT------------KDNVW-----PQVHTYLSSTGTKNFD-------
--------SQGVWVKLAMFHQLWLAYG
>Q2U0W8_ASPOR/271-580/Q2U0W8 no comment
SDLQ-STGFYLNPNEPLTVFV-ESSVRDGPKPRLVLGPPALVHPDHG----------KEH
VPAQLVELPPLENGRNKSVH-NFGGIIYIRYTHRASDQPPP-----PVFLRLGDTAEPFP
LFREGSTTD-AQWKSMLDVTK-VPFAEHDGKRVIITG-LAKHAKKYADNG-QRQQELLDT
YAHIIAIQD-RFSALKYNARDPRDRPSLLRP------MVVESVN---SGVATATNYRAAI
PNR----LSDQIYWV-PRLR--NSWMVFHELGHQRQITRTWSWR---A-MTEVTVNIYSL
ANLREYKPPGH-KNVAE--------------W-----DNAKQYLTKASKEKDF-------
-------DSAGFYLSLVMFEQLRVVFG
>C7MAR4_BRAFD/70-387/C7MAR4 no comment
TDLQ-PTGLYLPPDVQLGVEVEADGDDVPSIVIGAPGSQLDPDAEDE-----DDFVGRTL
TPRETE----LEPGANLVSD-AHGGVIYLSF---PGADGAA-----TATVSFGAAAEPMA
TFVRGTTAE-AEFQAQLDRSS-APFAELVSTHAIVTV-ERDRLLLFRH---EDHEKLLGI
LDRVVEIEQ-ETAGYTTEGGVESRPPSGPH-------HLVGYPDGIEGVGAYATNGYTAY
PPP----IQSTLLTV-SGLTL-DGWGPYHELGHHHQQE-PVNPG---D-VVEVTVNIFSL
AVQREFEREYG-QVPRMREVDPET---GTSHW-----DTAMEALEAGIRDYA--------
--------ELGPFEQLAPFDQLRLQYG
>Q4ZLQ6_PSEU2/229-528/Q4ZLQ6 no comment
ADYQ-PTGYFALAGQEFEVRV----WGNVDNLTLLVGTQGLADRDDP--------SEQSE
NMRARP----LTRGINIIRD-PLGGAIHIRN---LIGSRPG-----VARVIFGSGAIPMP
YYVNGITA--TQWRKMLLLTK-APEVELVGTHIVVAA-FRSTALKFSD---VEPSAIVHS
HEEVMRLEA-EVSGFDGSAPIHTRSR-----------LLIYAVEGSASKIPHATTGCIAL
PYREAIGEFNEALLG-GLAA--ERWVTLHEYGHHYQTS--YNSY---GLFGEITVNLYAL
AVGRHYINEYT-YVLPE-------------RW-----NGTVNWLALPRTEKIY-------
--------GAPESDPLAMFEQLRKGLG
>Q87UG7_PSESM/253-553/Q87UG7 no comment
ADYQ-PTGYFAPAGTDVELWI----SGNTENLTVLVGTQGMADRNNP--------FRQSE
NMRETP----LFKGKNIIRD-PLGGAIHIRK---LIGNTTG-----AARIVFMRGAIPMP
YYVSGATAQ-LQWLLMLLLTE-APEVELVGARIVVAA-LKETALKFSS---IGAQAVMRS
HEEVMRLEA-EVSGLDGSAPIHTRPA-----------LLIYAVEGSGTANPHATTGCIVL
PHTDYISQYNEALLG-GLAA--ERWVTLHEYGHHYQTS--YNSY---GPFGEVTVNLYAL
AVSLHYINEYT-YVFPD-------------RW-----SGTVNWLALPRTAKTY-------
--------GAPESDPLAMLEQLRKGLG
>C4S9X2_YERMO/76-373/C4S9X2 no comment
HPTQ-SSGFWANKGEILHIEYQHKGEAIDELPELWIVPVKKGKEANF-------------
ERQVVK----LQEGINEIEV-ANTGPLYFA-----ATNQPGSS---EMTVNLLKGGKPMP
RFILGENTA-EEWPQQLAQFSDAPFAELVGKRMILTM-PIKNMRKQA----TDPEGILLL
WDRIVDLAE-EQFGLSAERAFPHRATPFQY-------QFVSKPDST-GGTLSAGDYWLGS
NSE----YIPEVITT-ELLQ--KAWGPWHELGHHYQMP-AWTFD---N-DTETTVNLTSL
YVQRALG---E-TSRLE----------AESRW-----DLVDAFMKTSGHNYEE-------
---------VSPSIRFAMFWQLDLAFG
>C4ULT4_YERRU/77-375/C4ULT4 no comment
HPTQ-SSGFWANKGDSLRIDYQHQGEEIDVLPELWIVPVTKGDETKF-------------
DHQVVK----LQPGINEIEV-ENTGPIYFT-----ATNQPGSS---EITVNLLEGGKPMP
RFILGENTA-EDWQAQLVKFGDAPFAELVGKRMILTM-PIDDMRQQA----TDPEGVLTL
WDRIVELAE-EQFGLGNDRSFPHRTTPFQY-------QFVSKPDNT-AGYMSASDYWLGS
NAS----GIAEVINT-QKLQN-NGWGPWHELGHHYQMP-AWTFD---N-DVETTVNLTSL
YVQRALN---G-TSRLE----------VDSRW-----DAINEFLNKKGHVYED-------
---------GDVFVRLGMFWQLDLAFG
>C3BVY3_9BACI/80-377/C3BVY3 no comment
RNYT-PTGIYVKPNEQVTIEV--SGLSGLDKLGATIGTNEYDKE----------------
GGKAFR----LSPGSNTISS-PNGGLLGFD-----NCEGKG-----TVKVKVTQGGSPVP
FFELGKHTK-VDWIAMMDKYPNAPAVQLKSKRAVLTV-TRDSAKKYITD--QDPVPLLKK
YDEMILAQD-KISGLSETSSNPLHRSTRRLW------AFVENPNNPPGMYMYAGGDGVVF
TTAYD--AIKSALNA-NEF----GWGQMHEAGHTKQQY-PWTWD---G-VVEVNVNIYSL
AAQKQLF-PGQ-PTRLE----------KEGDY-----DRAFQYLKQTDKEYEN-------
--------INDPFVKVVMFWQLHLAYG
>C2VLX6_BACCE/87-383/C2VLX6 no comment
KSYM-PTGIYVKPNEQVTIEV-----SGTKKIKAIIGTTEYDKE----------------
GGKEID----LSPGSNTISS-PNGGLLGFD-----NYQKTG-----TVTVKVTQGGSPVP
FFELGKHTK-EDWIAMMDKYPDAHAVQLKSEKAVLTV-TQDSAKKYIVD--QDPVPLLKK
YDEMIRAQD-KISGLSETDPSPLHRPTRRIW------AFAENPNKK-TWGMYASTNGVFF
TTAGN--AIESALDV-NKF----GWGQMHEAGHKRQQQ-PWTWDDRRG-TWEVTVNLYSL
AAQKQLF-PNQ-PTRLE----------QNKDY-----DRAFTYLKQTDKEYKN-------
--------IDDLFVKLVMLWQLQLAYG
>C2NA49_BACCE/60-356/C2NA49 no comment
KNYM-PTGIYVKPNEQVTITV-----SGTQKIRAIIGTHQYDKE----------------
WGKEID----LSPGSNTISS-SNGGVLGLD-----NFQSTG-----TVKVQVTQGGSPIP
FFELGKHTK-EDWVAMMNKYPDAHAVQLKSERAVLTV-TRDSANKYIVN--QDPLPLLNK
YDEMIRAQD-KISGLSETEPNPLHRSTRRIW------TFVENPNAQ-SWGMYASWDGAVF
TTAGE--AIKSTLNV-NEF----GWGQMHEAGHARQQY-PWTWNDLRG-MGEVTVNLYSL
AAFKKIY-PNK-PTRLD----------TEGDY-----NRAFAYLKQTNKEYKN-------
--------IDDLFVKLIMLWQLHLAYG
>C3BVL2_9BACI/48-342/C3BVL2 no comment
SPYE-PTGLYASPNEKITILV-----EGTQNIQAYIGTFSYDAA-----------WNQDS
LIKSFT----LKPGENTIES-PNGGMIYFY-----NPQQGG-----TVRAEITAGGSPTP
FFELGKHTQ-QDLVNMLDTYPNAHAVELKGERVLITA-SPERVKKYLIGSNTDPVQLLKK
MDESIRIQD-RVSGLSEK-----EADKHYV-------HFVEDNHSK-DYYMYSYSSRTAY
VGD----AIQHVLDV-NDFIK-DGWGPWHEAGHQRQQT-PWTWD---G-LGEVTVNIYSM
SVQRAFG---S-KSRLE-----------KGTY-----EKAFNYLNKPQSEKDY-------
------NKIDDLFVKLAMFWQLDLAFG
>C3DVW8_BACTS/82-377/C3DVW8 no comment
SPYE-PTGLYAKSNEQITINV-----EGNQDIQVYIGTYSYDAS-----------WREDS
KIKSFT----LKPGINTIQS-PNGGMIYFY-----NKQQGG-----TIRTTITTGGTTTP
FFELGKHTK-QDLINMLDQYPNAHAVELKGERVLITA-SPARIKKYLLGSNTDPVQLLKK
MDEATRIQD-KVAGLSEE-----QVDKHYV-------HYVEENHSP-DYYMYATSYRTAY
VGD----AIQYVLDI-NKFIK-DGWGPWHEAGHLRQQS-PWKFY---N-MTEVQNNIYSL
SVEKAFT-SNQ-PFRLQ----------QEGAY-----TKAFQYLEQPNKNYDE-------
--------VSDVFVKLVMLWQLQLAYG
>A7GU48_BACCN/75-366/A7GU48 no comment
SPFE-PTGLYAKPNETIIIHV-----EGKQNIQAYIGTYSYDGN----------------
-PKKFY----LKPGKNEISA-PKGGMLYFE-----NANLNG-----ETKVTVSSGGTPIP
YFELGKHTK-EDWDAMLEKFPNAYAVELKGERSLFTV-TYKAAKQYLGG--KDPSPLLRK
HDEAIRIQD-KVSGVSEEYTGVAQADTHYV-------HFVEDFNKK-DGWMYATNYRTGY
VSD----AMKYVLDL-EHFEK-DGWGPWHEAGHQRQQT--WKWS---G-LTEVTVNIYSM
AVQRAFG---N-PSRLE----------AEERY-----NDIFLYLMKPQSEKNY-------
------DQIDNLFVKLGMFWQLDLAFG
>C3GRA3_BACTU/78-367/C3GRA3 no comment
SPNE-PTGIYAKPDEEIVVEI-----KGSQSIKAFIGTRAYDKE----------------
GPKEFD----LNPGKNIISS-PSGGILYFY-----NMNNTG-----EVTATVTSGGTHFP
LFILGKHTK-KDWDAMLEKYKNPYAIELKGDRSLITT-SYEKVEKNMKK--TDPTELMKK
HDEAIRIEN-ALSGLSEDGIGVANSGKHYI-------QFIEAKHPT-SPFMYANNYLTGY
AED----SIEFVLDI-EKFTK-DGWGPWHEVGHIHQQV-PWLSE---G-MGETTVNIYSL
AVQLAFG---N-KSRME----------VDGRY-----EEAFAYLNQPDDQKNF-------
----------DKADPLIMFWQLHLIYG
>C2W192_BACCE/78-368/C2W192 no comment
SANE-PTGIYAKPNEEITIEI-----QGKESVKAFIGTKSYDVE----------------
GFKEFD----LKPGKNVIKS-PNGGILYFY-----NLNDSG-----EVTAKVEKGGSHFP
LFILGKHTK-KDWDAMLEKYKDPYAVELKGERSLVTA-SYGAVKNHMGN--TDPVELMKL
HDKIIRMEN-SVAGLSEDGIGVAKSPSHYV-------QFVEKRIPAKGDHMFATHYHTGY
VPD----VMDKVLNT-EELKK-NGWGPWHEVGHLHQQA-PWQWT---G-MGETTVNIYSL
AVQTALG---N-KSRME----------VDGRY-----EQAFAYLNQPDEKKDF-------
----------DKSDPLIMFWQLQLVYG
>B5V8B8_BACCE/78-366/B5V8B8 no comment
SANE-PTGIYAEPNEEITIDI-----KGTQSIQAFIGTRSYDEK----------------
DPEEFD----LKPGKNVISS-SRGGILYFY-----NMNNEG-----EVTASVTNGGSHFP
LFILGKHTK-KDWDEMLKKYKDPYAVELKGERSLITT-TYDSVQKYMKN--TDPTDLMKL
HDKIIRLEN-AVAGLSEDSVGVAKSPTHYV-------QFVEKRKPAKGDFMFAKHYHTGY
IPT----AMNRVLDI-EVLEK-DGWGPWHEVGHLHQQE-PWKWS---K-VREVTVNIYSL
AVQKALG------NQLE----------MDEHY-----KNSFEYLEKPKAERFI-------
----------DDINPLTMFWQLNVVYG
>Q3ESH2_BACTI/90-380/Q3ESH2 no comment
STNE-PTGIYAGPNEEIKIEI-----KGTQSIKAFIGTKSYDEK----------------
GFEEFE----LKPGENNISS-SRGGILYFY-----NMNNDG-----EVTASVIHGGSHFP
LFVLGKHTK-KDWDAMLKKYKNPYAVELKGERSLITA-SPEAVANYMGE--TDPVELMRL
HDKIIRFEN-SVAGLSEDGIGVSKAPNHYI-------QFVEKRKPDKDDWMFATHYHTGY
VPE----TMDRVLNI-KRLQG-DGWGPWHEVGHLHQQA-PWFWS---G-VGEVTVNIYSL
SVQRMLG---N-KSSLE----------EDGHY-----KKAFAYLDNPDAQKKM-------
----------EEFEKLVMFWQLDLAYG
>Q72Y18_BACC1/78-368/Q72Y18 no comment
AANE-PTGIYAKPNEEMKIKI-----KGDKSIKAFIGTHAYDEE----------------
DPKEFD----LTPGENVISS-PVGGILYFY-----NPNNQG-----DITAEVTKGGSHFP
LFILGKHTK-KDWDEMLKKYENPYAVELRGERSLITS-SYDAVQDYMKN--TDPTELLKL
HDQIIRIEN-KISGLSEESVGVAKAPKHYV-------QFVENRYPEEGDWMNAYYYRTSY
VKN----AMKYVLDS-KELKT-DGWGPWHEVGHLHQQA-PWEWE---D-LGEVTVNIYSL
AVQTKFG---H-QTRLE----------EEERY-----KAAFAYLGQTDAQEKM-------
----------NEFEKLVMFWQLHLAYG
>Q631Q6_BACCZ/70-358/Q631Q6 no comment
SPYE-PTGIYVKPDEEVVIQV-----EGTQQIKAYIGTYSYEKE----------------
EPKQFN----LHPGENKISS-SNGGLLYFY-----NYHNTG-----EVVAKVKKGGTPNP
LFILGKHTT-KDWKRMLAENLDPYAIEMKGENSLLTM-HPETVAEHLKQ--EDPAALLKK
HDEIINIEH-KISGLSKDGAGVANQGKHSI-------HFVEDWYTD--DYMYATYYRTAY
SKG----NLESVLNL-EELTN-DGWGPWHEVGHQHQQE-TWLWD---G-LGEVTVNIYSL
AVQTTFG---H-KTRLE----------QEGRY-----EAAFAYLGKPDAQEKM-------
----------NEFEKLVMFWQLHLAYG
>C7BLH9_PHOAA/30-314/C7BLH9 no comment
SELQ-PTGFYVISGQEIMVNV---EGETDGSVNAVIGVPELNK-----------------
-PEKYL----LTTGLNKFTS-KNEGLLSFT-----NNNNHG-----YVKIIIQSELQKIP
SFKLNETNN-TDWENMMASYSDAPVVQLSSERAIIVV-RYNSAKKYL----TDPNALMKY
YDDFIRFQD-NISGILEDGKADYRVDSNKF-------LYVEAD----RLYMFATNGHMGF
NGDA---ALQRLLTT-N-----NGWGIWHESGHQRQQS-PYTWSGGTG-MTEVTVNLYSL
AVQEGFHDRAS-F--------------IDKYY-----PKIKEYLVTEEKNFDA-------
---------QDINIKLGMLWQLRLTFG
>C2C0C9_LISGR/80-401/C2C0C9 no comment
TSFE-STGLFLYKGDEITVEV---EGE-PENLELRVGQWGGYTNTPYIATGSQSYAFKEG
VVK-------LHGGTNTFTRNFSGGMVYLV-----NYSTTK-----AENVAIKG-GVKVP
YYVQGKTSI-DSFKNELEQYKDVPFMEFVNNDAIATI-RIDRAKDIFEKG-NQVDVFMSS
LAKIVKLQN-GAAGLSYDGQGAERKDLQR--------IHVMNPEWG-AGQLFATNNFIGI
HSAT---TKDREIFS-KGLDS-TDWGMLHESGHTYQNK-MYQWR---N-MTEVTVNIYAD
YAQKMWSADGT-GRYDAVNV-------KNGSR-----ASVQKYFKKLETDPTW------N
FDRESTETNDYHFALLGMFLTLPRTFG
>A5ZER3_9BACE/48-366/A5ZER3 no comment
SPFENPTGLYFEEGETIQVTA---PDLQGYQLNLLLVDF-----------SKPAEGEKKE
KTTVFT----LKTGNNKFYA-PHKGLVYVSY---YVKDCRKAP---EQKLTFHT-GINNG
VFNAYQHTN-DEWKRMLDSAI-AEVIDMQGKYVHLTF-DVKTLREKGS---DCGVEMIRM
YDRIILWQQ-EMLGIDQ------FGYRTNN-------HMFARISWA--GPPNANGKGVSF
P------RTSSIIRP-EDIRN-SNWVIGHEFGHVNQVRPGLKWH---G-TTEITNNIQAA
WIQYLLRPEGPFRIEHSKAPDGTGQKVYGGLF-----NWHFNHCVVQQKPLLY---NPRT
SFTPPYSDNKNPFVRLCPFWQLQIYNA
>C2FX19_9SPHI/90-406/C2FX19 no comment
SQYENPTGIYFSEGDSAILWV---EKTNATQLSLRVTNW----------------DDDEF
KQKDYP----LTQGYNAFKI-ENKGNSYIQY---FTPDKAGNN---KVKIHILS-GKVNG
VFDISKHTN-KDWDNLLANAT-APVLDIVGKQVQLAY-AVQSLQTSAA---HQGVELVKL
YDSIIGIQH-ELMGLKQ------TNRIPKN-------RMFGRVIWK--GFMHADGIGAAF
HNN----TMKDVASV-AGLRK-NSWGVAHEFGHVNQVRPNMKWV---G-TTEVTNNIYSV
WTQYIYNQKQP-KLEREKLKDYDEPK-IGGRI-----TAYMESAFIHRQPWLTQAGPDRW
DRERPRDWGGDHFVKLVPLWQLQLYFN
>A5ZFW6_9BACE/437-757/A5ZFW6 no comment
NPFENPTGIYFKDGEEAVVIL---GNTNGEQVNLKVYDF-----------DAIRQGQRTP
DPTSYP----LSEGINKLRI-AHGGLSYIEY---YTPNWKTAP---ALKLHIAS-GKVNG
YYDKHRDVS-ADWREILNKAT-YGCIDIKGDRVNLVF-GVNSIKTYC----DNLGKLIQN
YDDIVELEH-ELMGLDK------WGRRPKN-------HMFARVTKD---GLFADGWGAGW
YEG----CMNELASTTKSLRE-GVWAIAHEFGHVNQIRPGLKWV---S-TTEVTNNVYSV
CARYKFYRENM-PLEHERCNDGNDNNVRGGRF-----NSYLNYGIIKGEQWLCQKGQDNM
DPSK-YPYGGDHFVKLCPLWQLLLYYR
>B2UP41_AKKM8/169-484/B2UP41 no comment
SKFENPTGIFFEEGEDVLLVM---GDPKGEKLNLVIHNF-----------------GRDG
GHSSYP----LKEGVNIIRA-KNKGLGYIEY---FTPNYKKAP---KVHLSILS-GKVNG
VFVGGVSKN-SDWKKMLENSP-TEVVDIVGSRVHLVY-PVEELKQFCP---DKGEELIAL
YDRIIGMEQ-QIMGLYK------YRMLPKN-------RMFGRVIWN--GFMHADGTGAAF
HNG----TMKEVGNP-DRIPG-SAWGIAHEFGHVNQVRPAMKWV---S-TGEVTNNIYSA
YVNYMLNPSSM-RLEHERINGGDGNM-IGGRF-----NAYLNNGILKGENWLVQSGPDKR
SGGDNRPMVHDHFVKLAPLWQLELYFK
>Q5LB88_BACFN/442-745/Q5LB88 no comment
SLRDNPTGISVKDGEQLMIFV---GDTHGQTVSAVIQNL-------------DVPGGDGF
GGTSYP----LSEGANKITA-RNKGLMYILY---HTPDYETAQ---PVKIHIAS-GQVNG
YFDVAKHQA-SDWNKLLSNAV-DKYFDVVGHYAHLTF-PTERFRTHT----PDGKALIDA
YDQIVNSEM-ELMGLYK------YNKLFKN-------RMYLHVMYT--SYMYATSYHTAY
NDG----TLAELCNV-DKLKTSACWGPAHEIGHCNQTRPGLKWL---G-TTEVTNNIMSE
YIQTTIFGQPS-RLQTEDMGDG-----SRNRY-----SKAWTQIIAAGAPHGN-------
-----FGSDSDVFCKLVPFWQLELYFG
>A5ZEQ5_9BACE/448-745/A5ZEQ5 no comment
SLLDNPTGIYVAQGQELVVLV---ADAHNEDMGICIQNL-------------DKPGGDGF
GGDTYP----LTTGVNKIKV-KNKGLVYVIY---HTTSLEELAGKQPVKIHFAS-GKVNG
YFDSNKHEA-SRWSELLNNTV-CGYFDVLGTYAHLTF-PVNRLRNSTG---NRGKELIDL
YDEIVEKEQ-IFMGLKK------YGGMFMN-------RMYLNVMYH--NFMYASDYHTAY
HDD----TMDELCNP-DRLKTTGCWGPAHEIGHCNQTRPGLKWH---G-LTEVTNNIMSQ
YIQTTVWGNTS-RLQSE------------GWY-----TKAWDEIIAKRRAHAQ-------
--------ETDFFMKLVPFWQLELYWG
>A5ZF31_9BACE/465-760/A5ZF31 no comment
SLLDNPTGIFVPAGENLVVMA---DLNGLDKVNIRVQNL-------------DKPGQDGF
GGTEYT----IVNGVNTISI-KEKGLVYVMY---HKDDYENAP---EITLHFAS-GKVNG
YYDSQNPKLKGRWKELLNNSV-DTHFDVIGKYVHLTF-TTRSFLNYT----KDVDNLINL
YDDMIYRQQ-EFLGLEK------YDRMFHN-------RSYFHVHYNSGSFMYATDYHTAY
IES----SLNYLADE-TQMAA-NCWGPAHELGHIHQTRPGLKWH---G-MTEVTNNITAI
YVQTKVYNEPS-RLTVQ------------DRY-----VSAFNSIMAGQKAHNA-------
--------ESDVFNKLVPFWQLELYFG
>C5PVJ5_9SPHI/102-412/C5PVJ5 no comment
SKYQNITGIYLPIGKQTILVD---GISHDNHIKLVVPNW--DRHAPQGIDPTKDPKGWGI
EKQEFD----LRNGVNLVDIKNFGGLAYITY---FSDKPKEQM---PIQVHFLN-AAVNG
YFDISKHND-QDWNNLVDHAV-YPIVDAVGEHIQIAY-PTEAIKKYAY---GKGVELISN
YDSLVYRQH-RILGLIK------HNRVPEN-------KILSRVNYN--YYMFRDGDGVAY
MGDKPGYAMAMVVDPASVIKGDPCWGFSHEVGHVHQTRPYLSWG---G-LGEVSNNIFSL
YVTTSFGNKSR-ISEQN-------------NY-----EKVRNELYGKGKSYLQ-------
--------DGDVFNRLVPFWQLQLYFA
>A5ZF32_9BACE/104-408/A5ZF32 no comment
SRYENITGVYLEAGENVVLV----GDLHGRTVGLLIPDW--MRQPTLGYQPTKDPEGWGL
KKQEIL----LHEGVNVINV-KKAGNVYVDY---FADDPDTAP---AVTIHFVT-GKVNG
YFDATVQSN-EDWNRLLDNAV-SPVMDVKGKYIQLAY-PVEQLKKLTY---GKGKELAEN
YDKVMQVQY-DFSGATK------YNRIPKK-------RILARVNFN--YFMFRDGDGVAF
EGTDG--TMKAAIGP-EVT---TNWGIHHEIGHVMQMRPWLTWG---G-MTEVSNNLFSM
YGTMSLGDSSR-LSKRH-------------IY-----EVAFSKVLNAPEKQFI-------
------MCVKDPFHKLIPFWQIQIYAD
>B5CZV9_9BACE/104-408/B5CZV9 no comment
SRYENITGMYLEKGENVVLV----GDMHGREINLLIPDW--MRQPTPGFAPTKDPEGWEL
KKQVIA----LHEGVNVIHV-EKAGNVYIDY---FADDPETAP---GVTIHFVT-GKVNG
YFDAETQTN-KDWNKLLDQAV-SPVMDVKTRYMQLAY-PVEFLKKFDY---GKGKELAQA
YDQIMTQQY-EFCGALK------YNRVPEK-------RILARVNFN--YFMFRDGDGVAF
LGNES--TMKSALGP-DIY---KDWGVNHEIGHVMQMSPQLTWG---G-MTEVSNNLFTM
YVATLAGQPSR-LSKSK-------------NY-----DKAFKEVLEAEKKPFI-------
------MCVGDPFQKLVPFWQLYLYAK
>A2F335_TRIVA/131-431/A2F335 no comment
MGYH-PTGIYVPPGEVISIDI---PGNTIKRIVVQFNHHTHDQNNYN--------TRLGR
LKCRFT----LNSQHTEFAW-PYGGNLDLVT---YQDEFPL-----GFEVNISG-GIRMP
HFIYGVNTD-EEWETDLRKLA-APLTTFDTGTFLARM-PTHNIRGAVCV--NDGMRFWQT
VSWNSYDVN-EVTSVNRR-DGNVIRPLFY--------NFDSYVPAG-AAVAFVGGNFIQA
PPS----WAGGIVNY-DSAKW-GCWGLLHEYHHHFQSG--WGFA---N-PGEVTNNVLNL
IDMVLICEIDS-TRQVN----------FNGDYVGN--KDGWNRMSYQYNTINN-------
---------GDL---LSFYGNNVYYFG
>A2FD97_TRIVA/134-432/A2FD97 no comment
RGYH-ISGIYVPPGEVITVEI---PDNAIGKVVACLNQHAPNAQSPD---------RLPK
LSCRIT----LNSNKTQFAW-PYGGILDFAS---YYGRYKY-----GIEITITG-GIRIP
NFIYGVTTD-QEWDDDMRGLQ-APLAPFDVGTFVACV-PSQFCRGATRV--NDAMIFWQT
VSWNAYDVC-EVVGVSRILGGYVVNPIMY--------NFDAFTNPG-IALSYVGGNRIQA
PPS----WSGGLYTY-PRM---GTWGLLHEYHHQFQNN--WGWS---Y-WGEVTNNVLNM
IDMALLCEIDE-TRKIN----------FNGDFIIG--GGGWNWVSHQYNTINR-------
---------DDL---LLWYGNNLYWFG
>A2F153_TRIVA/139-445/A2F153 no comment
DIYH-STTLYAMPGELITFEI---PEFAVGKLNLVLNRQAPSNGDLT--------QRYPN
LQCSFT----LNAKKVTFGY-PLGGYMDIKC---WIDTFPLH----SVEINITG-GIRIP
YFRYGAESD-QDWEEETRNYV-APLTFYDTGNVKCIF-PSTFSRNQIRM--SDAGAFWRT
VGRVMYSVN-EVTNYDRRKDGRIKTAMWF--------NFDSYVPAG-AAVAFVGANFIQA
PFS----WSTAMINY-EGAKW-GCWGNVHEYGHHFQSG--WGIS---G-TGETTNNVINF
ITYAMLTEIDA-TRQIT----------LGGASFNA--ANGWAYITHEFGNMDA-------
--------TKDYAGPFFWYGNNAYFFG
>A2F4J7_TRIVA/57-363/A2F4J7 no comment
TDRH-WTAIYAPPGELITIEV---PPNAVGKIGVCFNHHINDDSGYR--------TRMRT
LKSSTT----LNREVNNVSW-PFGGAITITS---GIDRFNQ-----GLEVTITG-GIRMP
YFRYGYTTD-QEWEEELSLLP-GPLANIDMGNAIAQL-PSRQIRGKVKL--NDACAFWRS
ASRNLFSVN-EINGGPRRDDGRIKHPTQW--------TFDTYVPFGEAATAY-GGNRIIF
PPH----WSEGIVNY-DSAKW-GCWGQLHEYGHNFQYG--WGWPSFRD-YIEVTNNVLNL
ISYSKLTMVDS-RRQMT----------MGRNYIVGPQNGGHGETTHQFSLIQR-------
---------NDL---FSFYANFIYFFG
>A2DDW5_TRIVA/134-434/A2DDW5 no comment
GPFH-PTGLYAPPGELITIEI---SEKIVNGITLKINRHVDEAANDS--------NILGG
TKCDIV----LSGTVSKFCW-PYGGTIEFER---GVDTANQ-----GFDVNISG-VIRCP
YFIYGSTTD-EEWEEDLSKQA-GPVMFIDYGAGFVTM-PSTDAKNSIRL--NDAMAFWRG
VSRVLYSVN-EVTYRSRRSDGRVTTPMMT--------NLDKFVRAS-EAVALVGANVIYE
PPY----WYPGWVNY-ESARW-GCWGQLHEYAHHFQYF--WGWG---D-YGEVSNNVLNL
ISMSLMTEIDS-KRQIY----------LNGCISL---GDGWDYTSHPYGNINS-------
---------KDL---LFWYGLHLYWFG
>A2D9R7_TRIVA/134-434/A2D9R7 no comment
DSYY-PTGLYAPPGELITMEI---PPKAVGKITFIINRHVDPAASHA--------VRLGG
TRCEFS----LRGTVTQFMW-PYGGTIEFAV---SLDTFNA-----GVDVNVTG-AIRSP
YFIYGVTTD-EEWEEEVSKYP-GPILSLDYGAGFVAV-PSKFVRSYVKL--NDAMAFWRS
VSRVLYSCS-EVSAVPRRSDGRVRTPLRT--------TVDRFVRVG-TAVALTGGNQVYE
PIG----WQREWTNY-DYAKW-GCWGQLHEYAHHFQNG--WEFG---A-WGEVSNNVLNL
ISMSLMTEIDA-TRMIN----------FWGSIAM---SGDWANTAHQAGNVNA-------
---------KDL---LYWYGLHLYWFG
>A2FU45_TRIVA/133-441/A2FU45 no comment
GYNY-ITGLYVPPGEVITIEL---PFFFSTPVTILINRHIESFNNNN-----KPEDRLPR
LSCGIT----IKTQGPHYFAWPYGGSLELRY---DIDKFTF-----GLPIKISG-CVKMP
TLIYGRDSE-EDYMNEIRYLK-APVTVFDTGNLKITM-PSKLARNPNRL--YDTLHFWQG
AGRVLYSFN-EVQGMPRRSDGRVKVPVQF--------NIDRYVSHG-LAYCQQGSYYIQA
PTG----FAGAFTDF-ESVFSDGCWGPIHEYAHNFQQN--WGFGWFYS-YSEITVNVPNY
ISYSLMTTIDS-ARQAR----------IDGNYIM---KSDWNYNTHIYSTIGS-------
---------TAL---LFFYANNLYHFG
>B0JZ94_XENTR/437-736/B0JZ94 no comment
DAWR-STGLYLSPKKTAVLVF--PASAVQQGLQVQVGCH--SDDLGS----KDEFYRAPI
VVRKIS----VHREKVQVSC-YWGGLLYII-----VKERSNLG---TIPVQVYG-AEPAP
TYIKGKTSL-DSWLQSLRDLP-PPWAELITENIILTV-PSDAIRSL-----NDPEELLGF
WDRMMVAIT-ELAAIPTKFSRPE--------------RIVADVQIS-AGWMH-AGYPVMV
HLA----SVKYLTNL-SCMQKEGLWGPIHELGHNQQQK-VWEFP---PHTTEATCNLWSV
FVNETVVGVPR-DKANSALE-------PASRA-----ACIEAYLKTGPKLENW-------
----------NVWTALETYLQLQEGFG
>F115_XENLA/524-823/Q5XHI4-1 no comment
NAWR-STGLYLAPRKTAVLEF--PASAVHQGLQVQVGCQ--SDDLSS----ADKYCRAPV
VVRRFH----VDSQRVSVSC-FWGGLVYIT-----VKANSNLG---IIPVKVYE-AEPAP
IYIKGKTSL-DTWIQSIRNLP-APWAELITENIILTV-PSDAIRSL-----SDPEALLSL
WDKIMVAIT-ELAAIPKKLPRPE--------------RFVADVQIS-AGWMH-AGYPIMC
HLE----SAKELTDL-NIMQTGGIWGPIHELGHNQQKT-NWELP---PHTTEATCNLWSV
YVHETVLGIPR-SQAHCCLQ-------AETRA-----NHIQEYLRNGSNIEQW-------
----------NVWTALETYLQLQEGFG
>A4K534_BUFBG/524-822/A4K534 no comment
DTWR-STGLYLSPNKKATLVF--PASAAGKGLQVQVGCQ--SDDLSG----AAELCRAPV
VIHRKN----VVDEKVVISC-IWGGLLYVI-----VKGKSQLG---NVPVTIYG-AEPAP
TFINGQTKV-SSWLDTLRTST-SPWAELSAENITLTV-PTDKVRSL-----EDPESLMSL
WDNIMSTVT-DLASIPKKLPRPE--------------RIVADVQIS-AGFMH-AGYPIMC
HVP----TASSLVSV-TSLKK-GMWGAAHELGHNQQRG-VWEFP---PHTTEATCNLWSV
YVHEILLGIPR-DNAHPALK-------PGDRE-----KRIKQYLKNGAKLDEW-------
----------SVWTALETYLQLQECFG
>D3ZEW3_RAT/543-842/D3ZEW3 no comment
DVWM-STGLYLLEGQSTEISL--SEPAASAGLKVQIGCH--TDNLSH----ARQLFRAPV
VTYQCC----MDRTQRSVSC-LWGGLLYII-----VPKGCQLG---PVSVTITK-AVPAP
YYKLGKTSL-EEWKSCMQKNL-GPWGELATDSVILTV-PTESLKNL-----EDPAPLLQL
WDEIMKAVA-KLAAQPFPFERPE--------------RIVTDVQIS-NGWMH-SGYPIMC
HVE----SVQELVSL-ADIRSKGLWGPIHELGHNQQRS-GWEFR---PHTTEATCNLWSV
YVHETVLGIPR-AQAHPQLK-------PEERE-----KRIKEHLQKGAPLSDW-------
----------KVWTALETYLQLQEVFG
>F115C_HUMAN/542-841/A6NFQ2-2 no comment
DCWV-STGLYLLEGQNAEVSL--SEAAASAGLRVQIGCH--TDDLTK----ARKLSRAPV
VTHQCW----MDRTERSVSC-LWGGLLYVI-----VPKGSQLG---PVPVTIRG-AVPAP
YYKLGKTSL-EEWKRQMQENL-APWGELATDNIILTV-PTTNLQAL-----KDPEPVLRL
WDEMMQAVA-RLAAEPFPFRRPE--------------RIVADVQIS-AGWMH-SGYPIMC
HLE----SVKEIINE-MDMRSRGVWGPIHELGHNQQRH-GWEFP---PHTTEATCNLWSV
YVHETVLGIPR-AQAHEALS-------PPERE-----RRIKAHLGKGAPLCDW-------
----------NVWTALETYLQLQEAFG
>F115A_HUMAN/542-841/Q9Y4C2-3 no comment
YCWM-STGLYIPGRQIIEVSL--PEAAASADLKIQIGCH--TDDLTR----ASKLFRGPL
VINRCC----LDKPTKSITC-LWGGLLYII-----VPQNSKLG---SVPVTVKG-AVHAP
YYKLGETTL-EEWKRRIQENP-GPWGELATDNIILTV-PTANLRTL-----ENPEPLLRL
WDEVMQAVA-RLGAEPFPLRLPQ--------------RIVADVQIS-VGWMH-AGYPIMC
HLE----SVQELINE-KLIRTKGLWGPVHELGRNQQRQ-EWEFP---PHTTEATCNLWCV
YVHETVLGIPR-SRANIALW-------PPVRE-----KRVRIYLSKGPNVKNW-------
----------NAWTALETYLQLQEAFG
>EAPA2_MOUSE/533-832/Q6QR59-1 no comment
NSWV-STGLYLPEGQVAQVLL--PSEATHAKLKVLIGCH--RDNISQ----ARTYFRPPV
MTYVYH----LTSSQTSISW-LYGGLLYIM-----VPNKYNQD---NVSVTIRG-AVSAP
YFRLGKTTQ-EEWKNLITHSK-APWGELATDNIILTI-PTVNLKEL-----QDPYPLLQL
WDKMVRAVA-KLAARPFPFQRAE--------------RVVLDKQIS-FGFLH-SGYPIMG
LIS----IVEGIISE-FKIRSHGIWGVIHELGHNHQKS-GWTFP---PHTTEALCNLWTI
YVHETVLNIPR-EQAHPSLN-------PELRR-----QRIKYHLNKGAPLSNW-------
----------IMWTALETYLQLQEGFG
>C0PUF6_SALSA/366-664/C0PUF6 no comment
EEWL-STGLYLSPGMRTYMAM--PPQIVNQGWKVQIGCQ--TDNIGN----SNELRRAPV
VHERFP----IDSEMMQVWN-LWGGLLYLI-----APPQTQVE---GVEVIIQG-AVPAP
YYKTGMTTP-ADWAV-LRTAP-SPWAEMEFENIILTV-HSDVVRGL-----DRPDLVAAL
WDDIMRGVA-DLASIPAKLPRKE--------------RFVADVQIS-HGFMH-AGYPIMI
QSS----SAPDLVNP-EAARSSGLWGAIHELGHNQQRG-VWEFP---SHTTECTCNLWSV
YVHEEVLGVKR-DQAHPNMA-------LANRQ-----SRAEGYAKGGRNLASW-------
----------DMWVALETYMQLQDQFG
>F115_DANRE/539-838/A4IG42-1 no comment
EEWI-STGLYLSPGMKTYIAV--PPEIVGKNWQVQLGCQ--TDNIGG----SNTLKRAPV
VHARFP----LDSEMVQVWN-LWGGLIYLI-----APSQTKVD---GVEIVVQN-AVQAP
YFKSGETSV-ADWVSHIRQAP-APWAELEFENLIMTF-DSAFIRNL-----DRPDEVAKL
WDTIMRTIT-DLAARPPKLPRKE--------------RFVADVQIS-YGFMH-AGYPIMM
HSG----SAPGLVNV-EEAYKCGLWGAIHELGHNQQRG-VWEFP---PHTTECTCNLWSL
YVHEQVFGIKS-ANAHPAIT-------PADRQ-----ARTKMYFDGGKDLNSW-------
----------CMWMALETYMQLQEKFG
>Q4RYT3_TETNG/545-841/Q4RYT3 no comment
TDWI-STGLYLSPGMKTSVTF--PVEIINKGWMIQVGCH--TDYLNH-----SELKRARC
EHQLFL----ITSETMEVWN-LWGGLIYLI-----APTNAHVD---GAEVTVQV-AVSAP
YYKSGVTTA-ADWAQ-LRAAP-SPWAEMEFDNIVITV-PSDSVRNL-----ERPDELAAL
WNDIMAAIA-DLAALPQKLGRKE--------------RIVTDVQIS-HGWMH-AGFPIMA
FTS----AAHELVDV-DSMRR-GMWGPIHELGHNQQRR-CWEFP---PHTTEGTCNLWSV
YVHEKVLGINR-AQAHPNVS-------LENRK-----RRTEDYVKGGKNLSEW-------
----------YMWTALETYLQVQERFG
>Q4RYT4_TETNG/548-845/Q4RYT4 no comment
AEWI-STGLYLSPGMKTTLTL--PDAIVNKGWKIQIGCQ--TDYLQH-----QELKRAPS
VHLRVP----VTSETMQVRN-LWGGLIYLL-----APPQTRVT---GVEMLVQQ-AVLAP
YYKSGVTTA-CEWSQ-LRVAP-SPWAELEFDNIILTV-PSNVVRDL-----EQAEALAKL
WNNIMKSVA-ELASIPLKFPRKE--------------RIVSDVQIS-AGWMH-AGYPIMG
HIP----TASIMVSI-KKATTGDFWGPLHELGHNQQRF-CWEFK---PHTTEATCNLWSV
HVHEEVLGVCR-AKAHPDLT-------LEKRN-----ARIKKYVANGRSLSDW-------
----------NVWTALETYLQLQEKFG
>B4DBQ1_9BACT/384-684/B4DBQ1 no comment
PAWH-STGLYAAPGELIKVQV--PAELADKGLAVRIGCH--SDSLFH----LEKWQRAPE
ISRRDP----IKTPASTAAN-PFGGLIYIE-----VPDKLTAA---KVNVAISG-GVESP
RFVLGETKL-LEWKMRLRMAP-APWAELETKKVILSV-PSEKIRQL-----DDPEALLKF
WDQILDAEA-DLATIPHERKRPE--------------RIVPDVQIS-AGYMH-SGYPIMT
PLDK---SVEHSLSL-VEMKQ-GSWGHFHELGHNHQVG-DWTFD---G-TVEVTCNLFSL
YCMETLCGKPP-GQGHDAMK-------PEAVE-----KRLRGYLSSTDKFNRW-------
--------KSDPFLALIMYHQLRVGFG
>C1AFD9_MYCBT/409-708/C1ZFD9-1 no comment
TRWK-STGLYAAPGTLVKVKV--PRNIVGQKFEIQIGSH--SDSLWS----KDEWRRPPA
VIRQFP----IDKVEFEVGN-AYGGLIYVV-----VPQKTPAG---KFEVEFSN-VVDAP
YFVHGETDI-SDWRFTIRNYP-APWAELETRHLVITV-PSELVRKL-----DFPDKLMNH
WAAVLDACA-DLYSISRNRPYAE--------------RFVFDDQIS-AGFMH-SGYPIMC
FTNP---SAPEVVDL-NFLENKGGWGFYHELGHNHQKG-DWTFQ---G-TGEVTNNLTPL
YVIDTL--TPK-AFSHDAIQ-------QPERD-----NRERKYVMNGAPFSTW-------
--------QEDPFLALTMYIQLKEQFG
>A4GHK6_9BACT/570-876/A4GHK6 no comment
DNWF-STGLFASAGQKITIKV--PKDLVNAGLKIQIGSHIWGDYIFN----HMDMRRFPY
ITYQWN----LDQSEVIVNS-SFGGLIYIV-----DPVNQQINFPKTSSWSISG-AYLAP
RYIHGKTAL-NDWKNEIRKYP-APWAEIESDKVILTV-PSHAIRDL-----DNPDDLMEF
WARAIDAAA-DLASISRVREFPQ--------------RYVTDPNWQ---WGAHAGYPIMM
AGP----WYPYLLNH-KKIGLNYWWGTFHELGHNHQMN-DWMWD---G-WGEVSTNLWSV
YILETIAGLER-KNTWDGMLLF-----PGKRQ-----KRINKFIDRGRSFAIL-------
--------QADPELALEHLLQLQEVFG
>D3EB52_GEOS4/432-740/D3EB52 no comment
KNWI-STGLYAPAGEWVTIHV----PEGTQNLDVQVGAH--TDNLTS----KTEWERPPV
ITQRKP----LLSGENRIRS-PYGGLIYL------IPTKPQPSV--AKDVEISG-GVRAP
YYILGETSP-SEWEDAIRHHP-APWAELQGRRVILTL-PSEYIRQL-----EDPQQLVEK
WDAIVDYTE-EVAGLSPDQQLPHKSIDLPF-------RYVADRQIS-AGYMH-AGYPIMF
HIDP---SAGHAVDI-SRVTQ-GGWGFWHETGHEYQQG-AWNWN---V-TGEITVNIYSL
YVQEKFGNSSN-LLIRNAE--------GKDFY-----DRAFDYIESDLPGKSF-------
----GTSGQLDLFGYLVMFRQLSLAYG
>B2ULE8_AKKM8/277-579/B2ULE8 no comment
GGWH-STGLYAPPGAEISCSL--SGAPKDGSISVRIGCH--TDSLHK----LDEWKRVPE
ITMQVP----AGRGRVKMVN-PMGGLVYVN-----VGQRPRRGK--VFKVQISG-AVPSP
LFVMGKTTP-EQWAEQLENTK-APWGEIRMPRLIVTM-PVEQLKQC-----PDVQKTAEF
LQKNMALQD-WIMGWDTKPDRLHHPM-----------RFVVDRQIS-AGAGH-SGYPAMA
TKD----WTNSIATG-SIIHS-GSWGLWHELGHNHQSP-PFTME---G-QTEVSVNIFSM
VCEVMGTGKDF-ESCWGGGMG------PYGMS-----AEMKKYFSGTQTYNEA-------
----------PNKVQLFFWVELMYYLG
>D2VFD2_NAEGR/384-673/D2VFD2 no comment
KRWQ-CTGFYALPGATLEVIL----SNPKGVSNVRIGGH--TDGIAH----LDSWSRWPS
ISKTFSISA-TTNSTGTITC-LNGGTIYIE-----VSSIPL-----SVDVTVIGQVVKTP
FFKDGIHTD-QEWNSTIRNYP-GPWVEIESEHFAFNVQATPTARQL-----SEVSTVAKY
WGNVVAMYY-ELSQRQTRDYKE---------------RMQADIQIS-AGYMH-SGLSFYD
FSR----SERWNYSS-------RRWGHYHELGHNFQEG-AWTYD---Q-SGEVTCNIFSL
YLEEHYPDSAN-TYGKGFNP-----------------PRGLETTYKGNTQPFK-------
--------GDWTSAGLLFYLDLIQAFG
>C2G4C5_9SPHI/101-419/C2G4C5 no comment
GAWQ-STSMFAPAGELIVIDV----PQGVYGLKAQVGPHVYTGSTKI-----EFPRRDEK
IVVSKD----LFPGKNYIRN-LYGGLVYI------IPERPLGR---VVDLLFSG-TTLAP
SFKLGKMTD-QQWKDLVNKSS-VPWFELEGNRIVFTL-QTERLKRFPI---NSPTELMEL
WDKMIKEAYWDWTGMTEGNPDVKHRAPFNKW------RIVHDVLFE-PGVAQVSGYPVRA
GANDQ--YFGQAVTI-NSVRT-QNWGTYHELGHNMQQGRVWSFD---G-NGEVTNNLFSF
KVAMINGRQHT-KIAEVWPTGLEWINYVPKDA-----ADANRKIWANMPTLSK-------
---------NHNDAKLIMYAQIFEKYG
