# Supplementary material for: A Novel Extracellular Metallopeptidase Domain Shared by Animal Host-Associated Mutualistic and Pathogenic Microbes
Source: PLoS One. 2012 Jan 27;7(1):e30287. doi: 10.1371/journal.pone.0030287 (PMC3267712; doi:10.1371/journal.pone.0030287)
Supplement: Figure S5 — M60-like/PF13402 alignment of 57 PF13402 and 4 PF03272 sequences and 175 sites used to infer the phylogeny shown in Figure 6 (57 PF13402 sequences only) or Figure S7 (all 61 sequences). Format: text file with sequences in fasta format to be open in a sequence alignment editor such as SEAVIEW. (FAS) [file pone.0030287.s005.fas]

>Vib_cho_147673383s A2PMA3_VIBCH/543-846 no comment
GNRQPTGQWAEAHQPFSVSSPVTITIALADDGDSPKMQTFTPYGGLIYAQVKLTFSGTID
APLYIDGKAPIGEVVSDTFIFTAPKANLNAGGIEQFAKDLDQFSADLNDFYARDEHFVND
VAISVGAAHSGYPVMNDSFSSRSLNTSWLLWHEVGHNSAEATEVVNNLLALYMQD
>She_hal_167625404s B0TT98_SHEHH/1061-1372 no comment
GNRQPTGQWAVAQQSFTVSDPVTITVALADDGDIGSSYSLTPYGGLIYVQVTLNFTGSVD
APLYQYDGAPIGEVISQSFVYTAAKANLNAGSPEQFAKELDTFAEDMNNFYSRDEHFVND
IAISIGAAHSGYPVMNASFESHNLALSWLLWHEVGHNAAEATEVVNNLLALYMQD
>Gri_hol_262274179s D0I5Y8_VIBHO/1018-1321 no comment
GNRQATGQWAVAHQPFTVSSPVTVTVGLHDD-DANKHETFTPYGGLIYVQVNITFSGTVD
APLYDSKKAPIGDVVSGAFIYSAPKANLMAGGIQKFAEDLDTFASDLNEFYARDEAFVND
VAISIGAAHSGYPVMNGSFNSENIPTDWLIWHEVGHNAAEATEVANNLVGLYMQQ
>Vib_mim_262165773 no comment
GNRQPTGQWAVAQQEFSVSSPVTITIALADDGDQPKTQSFTPYGGLIYAQVTLSFSGTVN
APLYKNGQAPIGEVVSNTFVFTAPKANLNAGGIAQFADDLDTFSEDLNDFYARDEHFVND
IAISVGAAHSGYPVMNSSFRSQSLNTSWLLWHEVGHNAAEATEVVNNLLALYMQD
>Pho_dam_269102481s D0YX39_LISDA/1086-1383 no comment
NNMQSTGLWAHQHQQVQVSVPATITVSLIDDYDGSNLSFRVPYGGLIYIKAEFSFSGVAT
AAFWKDNQVPLAEIDTGHVIYTTPVENIEQQDIQIFVDEMNKFANSASDFYGRDERFVND
IQISIGAAHSGYPVQSTTYKGNKIPTDWLLWHEIGHNLASATEVTNNILALYMQE
>She_pea_157962457s A8H5W9_SHEPA/1007-1304 no comment
NNMQSTGLWAVKRSVVTVSHDATITVALVDDKAGSTTEIIAPYGGLIYIKVEFNFSGVLE
ASLWKNGQVPLAEVVTGQFVYTTPVNNVTDTDIQAFASGMNDFAEKASDFHARDNRFVND
VQISIGAAHSGYPVMSTTYDANSIPTDWLLWHEIGHNLAAATEVANNLLALYMQD
>Vib_cho_153800429s A2PNQ0_VIBCH/1045-1345 no comment
GSRQPTGLWAPQLQDVTVTAPATITVALVDDYDGHSLTFKVPYGGLIYITLTYSFSNVLK
ASYWKDGQVPLAEIDTGHFIYTTPVKNTKNQDLVQFSEQMNIFAESASDFYGRDEHFVND
IQISIGDAHSGYPVQSNSYTAEKIPTDWLLWHEVGHNLATATEVTNNILALYMQE
>Vib_fis_197336097s B5FBF1_VIBFM/1045-1354 no comment
GNNQSTGLWAPQLSEVTVRVTAMITVMMADDHDGRSTTFKVPYGGLIYIKAEFSLDGVEK
AAWWKKDPAPIAEIDTGSFIYTTALNNVKTADLNEFSKNMNRFADAASDFYGRDERFVND
VQISIGAAHSGYPVMSSSFSSNKIPTDWLVWHEVGHNLASATEVTNNLLALYMQE
>Esc_col_157156747 no comment
GNMQSTGLWAPAQQEVSIEVPVTVTVALADDLKANDKVFKVPYGGLIYIKADFTFTGVVK
APFYKDGKAPLGELESASFVYTTPKKNLNAGGLEQFANDLDTFASSMNDFYGRDSRFAND
VQISIGDAHSGYPVMNSSFNSTTLPTDWLIWHEVGHNAAETTEVANNVLALYMQD
>Tri_vag_123449825s A2F335_TRIVA/131-431 no comment
MGYHPTGIYVPPGEVISIDTIKRIVVQFNHHLNSQHTEFAWPYGGNLDLVFEVNISGGIR
MPHFIYGVAPLTTFDTGTFLARMPTHNIRGNDGMRFWQTVSWNSYDVNEVTSVNRFYNFD
SYVPAGAAVAFVGGNFIQASWAGGIVCWGLLHEYHHHFQSGGEVTNNVLNLIDMV
>Myc_pen_26553774 no comment
YGAYTTGLYLPAGEVITINAALNIRLVINDNLRKNNFSFGNPLGGMINLEFRVVIDGAVE
ALHYVHGYAPFVEIENDYTKFLVKSNLGQFNNPYKSLDLWNKLSYESRYVSGLNEYFTDY
QYYVDGGAAYTSNAYNVMP-WGSAVTNWGVIHEYNHHFQVNNEVTNNVLNLLAYA
>Tri_vag_123975108s A2F4J7_TRIVA/57-363 no comment
TDRHWTAIYAPPGELITIEAVGKIGVCFNHHLNREVNNVSWPFGGAITITLEVTITGGIR
MPYFRYGYGPLANIDMGNAIAQLPSRQIRGNDACAFWRSASRNLFSVNEINGGPRQWTFD
TYVPFGEAATAYGGNRIIFHWSEGIVCWGQLHEYGHNFQYGIEVTNNVLNLISYS
>Clo_per_182626537 no comment
KGSHSLASYVPAGEIATIKGKLKISVGMTMVVNENETQVGTPFGGMIYIDFEIDVKGVVD
TPYYDLGRGLFAEIRTPYLRFMVPSKFIRNNNPYNAALFWTNSVALSSNIMDQQYSLIFD
QYITAGIAYASVGAWICNLATSALDYEWGTIHEINHHYQKRSEITNNALSSVSYI
>Ent_dis_167386304 no comment
VFGQRAVAWAFPGEVVTIKSYKGVQVSIGKCLGKNTTESYIPFGGMVYLRFYVTFSNVGR
APIINYNIGNVAEIRTPGNRLVFTSRHIRNEDAQYISDYWLKAISISNYAVTLENTLNFD
QRVDAGAAVAFVGRWFTQHASGCVNKNWGPLHEMNHHMQGTGEETNNVMTSINYI
>Ent_his_67478183 no comment
VFGQRAVAWAFPGEIVTIKSYKGIQVGIGKCLGLNTTQPYIPFGGMIYLRFYVTFSNVGR
APIINYNIGNVAEIRTPGNRLVLTSRNIRSEDAQYISDFWLKAISISNYAVTLENTLNFD
QRVDAGAAVAYVGRWFTQNAAACVGKNWGPLHEMNHHMQGTGEETNNVMTSINYI
>Cry_mur_209875641 no comment
--NKTLELFFFKDKIINKYNYVTIRVQIGCHLNNSRNNISIPYGGLLYFEETAPFFVDVE
FPQVNLGEAPWGELHGLRVIITLPLSTLKFENPQEIVDFWDNVIQIQDELLNEGLRIVCD
IQISDGYMHSGYPIMTHMDHGKLVNIDWGLYHEIGHNRQKPEEVTVNIFTLYTFN
>Cry_par_126649195 no comment
FEWQNTGVYIKHKSFLKAETPIKSMLHVGSHWSISETNYITPCEGIVYFEIGIPLIGVVT
TPIYTIDK-PAWTELHGKKIILTPSRILYSDCVDDLLEFWDKVIDTQNELYFNYKRIVCD
IQISDGYMHSGYPIATHLDSGGILDLNWGIYHEIGHNRQSSEEVTVNLFTMYSYY
>Mon_bre_167537271 no comment
NGWAFLRAWVNGGEPFRVLAADAVSLRIGCHVTPDVTRSLAPWGGLLYLQARVYLEQHKA
SCVEMHPAVPWCELAGANIILTVPTPAAQRHRIPRLLRFWDDVLRAHRDLRRLGPRIVFD
VQIAAGYMHSGYPVMAHLDGGPTALQNWGIFHEFGHNLQESGEVTVNLFTLNAMD
>Bra_flo_260841027 no comment
KERHSTGYYLPAGKVLTIKHLDDWRVRVGAHLEAETKISS-PYGGLIYFELTASMENVVE
APFYDLEDGLWADLAGEHIIFTLPAASVRDEDPSEGLRAWDDVVKAHHELRGTNPRIVPD
RQPKAGWMHAGYPIVTNMDDKFILDGNWGLFHELGHNMQRKGEDGAQHDVWKKKA
>Hom_sap_194097425s F115C_HUMAN/542-841 no comment
DCWVSTGLYLLEGQNAEVSASAGLRVQIGCHMDRTERSVSCLWGGLLYVIVPVTIRGAVP
APYYKLGKAPWGELATDNIILTVPTTNLQAKDPEPVLRLWDEMMQAVARLAAEPFRIVAD
VQISAGWMHSGYPIMCHLEVKEIINEVWGPIHELGHNQQRHTEATCNLWSVYVHE
>Xen_lae_147906687s F115_XENLA/524-823 no comment
NAWRSTGLYLAPRKTAVLEVHQGLQVQVGCQVDSQRVSVSCFWGGLVYITIPVKVYEAEP
APIYIKGKAPWAELITENIILTVPSDAIRSSDPEALLSLWDKIMVAITELAAIPKRFVAD
VQISAGWMHAGYPIMCHLEAKELTDLIWGPIHELGHNQQKTTEATCNLWSVYVHE
>Dan_rei_147905224s F115_DANRE/539-838 no comment
EEWISTGLYLSPGMKTYIAVGKNWQVQLGCQLDSEMVQVWNLWGGLIYLIVEIVVQNAVQ
APYFKSGEAPWAELEFENLIMTFDSAFIRNDRPDEVAKLWDTIMRTITDLAARPPRFVAD
VQISYGFMHAGYPIMMHSGAPGLVNVLWGAIHELGHNQQRGTECTCNLWSLYVHE
>Akk_muc_187736004s B2ULE8_AKKM8/277-579 no comment
GGWHSTGLYAPPGAEISCSKDGSISVRIGCHAGRGRVKMVNPMGGLVYVNFKVQISGAVP
SPLFVMGKAPWGEIRMPRLIVTMPVEQLKQPDVQKTAEFLQKNMALQDWIMGWDTRFVVD
RQISAGAGHSGYPAMATKDTNSIATGSWGLWHELGHNHQSPTEVSVNIFSMVCEV
>Cht_fla_196234345s B4DBQ1_9BACT/384-684 no comment
PAWHSTGLYAAPGELIKVQADKGLAVRIGCHIKTPASTAANPFGGLIYIEVNVAISGGVE
SPRFVLGEAPWAELETKKVILSVPSEKIRQDDPEALLKFWDQILDAEADLATIPHRIVPD
VQISAGYMHSGYPIMTPLDVEHSLSLSWGHFHELGHNHQVGVEVTCNLFSLYCME
>Ver_spi_171910467 no comment
---TSTGLYAVAGEPITVTVGNGFSIRVGCHIENVETKMGTAFGGLVYITFKVKIAGAVE
SPYFKLGR-PWAELAGEKMVVSLPSEVARKTNPTELMEFWDRVVTAQDDISNQTARMVAD
VQISAGFMHSGYPIMIHTPAEMVTYGGWGFYHEIGHNHQRGGEVTNNVFGLYCYT
>Yer_mol_238796308s C4S9X2_YERMO/76-373 no comment
HPTQSSGFWANKGEILHIEIDELPELWIVPVLQEGINEIEVANTGPLYFAMTVNLLKGKP
MPRFILGEAPFAELVGKRMILTMPIKNMRKTDPEGILLLWDRIVDLAEEQFGLSAQFVSK
PDSTGTLSAGDYWLGSNSEIPEVITTAWGPWHELGHHYQMPTETTVNLTSLYVQR
>Yer_ruc_238755783s C4ULT4_YERRU/77-375 no comment
HPTQSSGFWANKGDSLRIDIDVLPELWIVPVLQPGINEIEVENTGPIYFTITVNLLEGKP
MPRFILGEAPFAELVGKRMILTMPIDDMRQTDPEGVLTLWDRIVELAEEQFGLGNQFVSK
PDNTGYMSASDYWLGSNASIAEVINTGWGPWHELGHHYQMPVETTVNLTSLYVQR
>Yer_ent_123443045 no comment
HPTQSSGFWANKGDNLRIEIDALPELWIVPVLQRGINEIEVENTGPLYFVITVNLLEGKP
MPRFILGEAPFAELVGKRMILTMPIADMRETDPEGVLVLWDRIVSLAEEQFGLSAQFVSK
PDSTGYMSAANYWLGSNASIAEVINTGWGPWHELGHHYQMPTEVTVNLTSLYVQR
>Asp_fla_238492663 no comment
SDLQSTGFYLNPNEPLTVFDGPKPRLVLGPPLENGRNKIVHNFGGIIYIRVFLRLGDAEP
FPLFREGSVPFAEHDGKRVIITGLAKHAKKQRQQELLDTYAHIIAIQDRFSALKYRPMVV
ESVNGVATATNYRAAIPNRSDQIYWVSWMVFHELGHQRQITTEVTVNIYSLANLR
>Pse_syr_66048113s Q4ZLQ6_PSEU2/229-528 no comment
ADYQPTGYFALAGQEFEVRNVDNLTLLVGTQLTRGINIIRDPLGGAIHIRARVIFGSAIP
MPYYVNGIAPEVELVGTHIVVAAFRSTALKVEPSAIVHSHEEVMRLEAEVSGFDGLLIYA
VEGSKIPHATTGCIALPYRFNEALLGRWVTLHEYGHHYQTSGEITVNLYALAVGR
>Bra_fae_257068157s C7MAR4_BRAFD/70-387 no comment
TDLQPTGLYLPPDVQLGVEVPSIVIGAPGSQLEPGANLVSDAHGGVIYLSATVSFGAAEP
MATFVRGTAPFAELVSTHAIVTVERDRLLLEDHEKLLGILDRVVEIEQETAGYTTHLVGY
PDGIVGAYATNGYTAYPPPQSTLLTVGWGPYHELGHHHQQEVEVTVNIFSLAVQR
>Clo_per_168211786 no comment
SSFQSTGLYVTAGEEFEVYNGVMPQLCFGQVENINPSAVYINNANKNDQAPKIRLEGGTK
FPTYIYGEYNIIELVSENCVITTAKGAVKALTVEDTMRELEEMYEMFQGFQGFDKKFIAR
VFLGLGYADHGYTGYLGSNFFKQIVLNWAYNHEFGHIFNTQGEVTNNLYAQEYRR
>Mol_bac_237732773 no comment
NSWQPLGYVTYPGDTFIVYGKRNGQAVNLQLLKVGKNEISMEKGGSVYVQEKIATLDLEK
VKTYLQSLLGATEIMLDHMLYSVGKQIMAGEKANQLLNSLNAMDQMMEQNKGLNENIRYQ
RMFAAFMYAGGNHIGIEWGVSGLSNGGWGIAHEIGHNINQGAEITNNYFSLLSQN
>Clo_per_110802272 no comment
QDWQITGLSARAGDKINVYGDPTPTLLYKQSINYESNGIPKIQGGDLFFTPKVRIEGASK
YPVFILGKPNIFAVSSKKSLEFVATYALDWKTPKYTAEQWDQYIADAMEFWGFDNIMPMV
KNLSAFMNAGNGVIGIRPGQDAILAAGWGVAHELGHNFDTGVEVTNNIMPLFFES
>Clo_bar_164687481 no comment
TDLQSTGIVARPGQVFKIFNTKLPQIVFTQQLKKGLNVITVVKGGAVYLMPVVRIDGGEE
FPLYNEGDVDIFEFNTKRLLYTGAKAAYQVVDVGESIQVWNDKIQEAFDFAGLKDVRTTI
RLMQGAAYAAYGHVGIQRGIALRTD-LWGMVHEVGHQMDISGEITNNMFANNAYI
>Clo_bot_188590139 no comment
NDYQPLGISARAGDEISIYGNVMPEVIFTQYNVIEVPKIGSERGGSVYVRIKIRVSGGTK
IPYLNLSNLNSTEIVTDKFLLTLATEVLRGTLSDKIDKVYDALLAWEEIAYGVKGSMPSS
RLNIYTRMFSGAFMYASSGVAPLLNGGWGIAHEIGHVIDEGGETTNNIISLMAQT
>Bac_cac_153807502s A5ZFW6_9BACE/437-757 no comment
PFENPTGIYFKDGEEAVVINGEQVNLKVYDFLSEGINKLRIAHGGLSYIELKLHIASGKV
NGYYDKHRYGCIDIKGDRVNLVFGVNSIKTDNLGKLIQNYDDIVELEHELMGLDKHMFAR
VTKDG-LFADGWGAGWYEGMNELASTVWAIAHEFGHVNQIRTEVTNNVYSVCARY
>Bac_the_29348424 no comment
QLDNPTGISVKAGENLIVLDTHGYDIGLRVQLNQGINKLTISEQGLVYVMVKIHFASGKV
NGYFDSQNNRYFDVLGKYAHLTFTSDLRTYSKGDELIDLYDKIVYSEQQLLGLEKRMYLN
VMYKSYMYATAYHTAYNRTMNEICSPCWGPAHEIGHCNQTRTEVTNNIMSEYIQT
>Bac_fra_255010514 no comment
LRDNPTGISVKDGEQLMVLHGQIISAVIQNLLSEGANKITARNKGLMYILVKIHIASGQV
NGYFDVAKDKYFDVVGHYAHLTFPTERFRAPDGKALIDAYDQIVNSEMELMGLYKRMYLH
VMYTSYMYATSYHTAYNDGLAELCNVCWGPAHEIGHCNQTRTEVTNNIMSEYIQT
>Bac_the_29349652 no comment
DLDNPTGISVKAGDDIIVLDTYGQNISMQCILNPGVNKLTMGEGQLFVMYIKIHIPLGTV
NGFFDLKE-KYFCIRGEKIMFYFRNKLLEYNNILSAIHLWDNIVGWQQELMGIDDNHLFA
ISPESYMWASDYQIGFVYTGNILLEDAWGPAHEIGHVHQAATESSNNLFSNFIIY
>Bac_cac_153807561 no comment
NLDNPTGIYVNKDEEIIVLQKVSLQCIWEENLEEGVNLLKMGPGQLFVMHIKIHIPLGVV
NGFFDLEE-KYFCVRGERMMFYFRLKMLDATEILSAIHLWDDIVGWEQSLMGISQNHMFA
ISPESYMWASDYRMGFVYTKNILLREAWGPAHEMGHVHQAATESSNNLFSNYVIR
>Bac_the_29349680 no comment
PLCNPTGIITNAGEEMVVLQGESISLRCCSDLKNGINKFSFRAGNLFVIYQYVEITERVG
FNVWDLTVKCVFVLKGRKILFTAKDLLQNQYGVVRGMERWDNLIDWEQELAAIDTTFTDG
LYATYINMAAGDVSTKDGWKNNFDPREWGPGHELGHMHQGATESSNNLFSNYVVY
>Bac_ple_198275420 no comment
NLDNPTGISVQQGDEIIVLDTHGQQISLQSILSPGINKLTMKEGQLFVMYVKIHIPMGKV
TGFFDLKE-KYFCVRGERIMFYFTAKMQEFNQILSAINLWDDIIGWEQELMGIEDNHIFA
ISPESYMWATDYCIGFVYTNNILLKEAWGPAHEIGHIHQAATESSNNLFSNYILY
>Bac_cac_153807218s A5ZF32_9BACE/104-408 no comment
RYENITGVYLEAGENVVLVHGRTVGLLIPDWLHEGVNVINVKKAGNVYVDVTIHFVTGKV
NGYFDATVSPVMDVKGKYIQLAYPVEQLKKGKGKELAENYDKVMQVQYDFSGATKRILAR
VNFNYFMFRDGDGVAFEGTMKAAIGPNWGIHHEIGHVMQMRTEVSNNLFSMYGTM
>Bac_ple_198276091s B5CZV9_9BACE/104-408 no comment
RYENITGMYLEKGENVVLVHGREINLLIPDWLHEGVNVIHVEKAGNVYIDVTIHFVTGKV
NGYFDAETSPVMDVKTRYMQLAYPVEFLKKGKGKELAQAYDQIMTQQYEFCGALKRILAR
VNFNYFMFRDGDGVAFLGNMKSALGPDWGVNHEIGHVMQMSTEVSNNLFTMYVAT
>Sph_spi_241893955 no comment
KYQNITGIYLPIGKQTILVHDNHIKLVVPNWLRNGVNLVDINFGGLAYITIQVHFLNAAV
NGYFDISKYPIVDAVGEHIQIAYPTEAIKKGKGVELISNYDSLVYRQHRILGLIKKILSR
VNYNYYMFRDGDGVAYMGDMAMVVDPCWGFSHEVGHVHQTRGEVSNNIFSLYVTT
>Pre_mel_252120477 no comment
SMTNPTGVTARDGEDLFVFIPQDATVQIELVLKKGLNIILNENNVFVNYIKPMNIHIGKV
NGYFDLTKAKAFNMKGELVVMNMPSQACKDVHMKELVEIWNSIVQREDDLMGFRANVLNA
TAVDGYMYATTGGTYYNYNLADVLNYLWGPAHEFGHNHQQLTEISVNMYSNMVMF
>Akk_muc_187735133 no comment
KYDNMTGVYLEKGRHVVLVISLLLPNLMRKPLKEGINIIDVTPANAYISYIPVHFVTGKA
NGYFDTTRSPIMDARG-KYIQVAPVEFLKKDRGTELINAYDKLIGIQYQLMGLDKRVLAR
VNFNYYMFRDGDGVAYLGNMRMVTDPCWGFSHEVGHVMQMRTEVSNNIFSLQAAA
>Akk_muc_187735409 no comment
KFDNPTGIVAEKGDEILVFPTHGEDIGLASVLNEGVNKIRINRSGLLYVMITVHIPVGIV
NGYFDVTR-SMFDIVGRNSMMILHTKYLKDDSITKSVRVWDESVKAMWKIMGFDKRQLGV
SVEGAHMFATWYYCGYSIGLKNEVLALWGIGHEIGHCYQHPSESSNNFFAQLILD
>Akk_muc_187736481s B2UP41_AKKM8/169-484 no comment
KFENPTGIFFEEGEDVLLVKGEKLNLVIHNFLKEGVNIIRAKNKGLGYIEVHLSILSGKV
NGVFVGGVTEVVDIVGSRVHLVYPVEELKQDKGEELIALYDRIIGMEQQIMGLYKRMFGR
VIWNGFMHADGTGAAFHNGMKEVGNPAWGIAHEFGHVNQVRGEVTNNIYSAYVNY
>Pse_syr_66047475 no comment
TDFQPTNIYVTKGDQLEITYMNRVSAVIGVPLQRGLNVLVATNTGLLGFTVVLDITGYNH
VPFFRMDMAPVVLLTSPRAIVVVRYQSAQLTDPAKLMGNFDDAISAQDGISGVINHFYVE
ADRL-YMFAMDGHMGFNGSLARLLSTGWGPWHESGHQRQLSTEVTVNLYSMAAQE
>Pho_asy_253989814s C7BLH9_PHOAA/30-314 no comment
SELQPTGFYVISGQEIMVNTDGSVNAVIGVPLTTGLNKFTSKNEGLLSFTVKIIIQSLQK
IPSFKLNEAPVVQLSSERAIIVVRYNSAKKTDPNALMKYYDDFIRFQDNISGILELYVEA
D---LYMFATNGHMGFNGDLQRLLTTGWGIWHESGHQRQQSTEVTVNLYSLAVQE
>Bac_cer_229100570s C2VLX6_BACCE/87-383 no comment
KSYMPTGIYVKPNEQVTIEGTKKIKAIIGTTLSPGSNTISSPNGGLLGFDVTVKVTQGSP
VPFFELGKAHAVQLKSEKAVLTVTQDSAKKQDPVPLLKKYDEMIRAQDKISGLSEAFAEN
PNKKWGMYASTNGVFFTTAIESALDVGWGQMHEAGHKRQQQWEVTVNLYSLAAQK
>Bac_cer_206976683s B5V8B8_BACCE/78-366 no comment
SANEPTGIYAEPNEEITIDGTQSIQAFIGTRLKPGKNVISSSRGGILYFYVTASVTNGSH
FPLFILGKPYAVELKGERSLITTTYDSVQKTDPTDLMKLHDKIIRLENAVAGLSEQFVEK
RKPADFMFAKHYHTGYIPTMNRVLDIGWGPWHEVGHLHQQEREVTVNIYSLAVQK
>Bac_thu_228930091 no comment
SPNEPTGIYAKPDEEIVVEGSQSIKAFIGTRLNPGKNIISSPSGGILYFYVTATVTSGTH
FPLFILGKPYAIELKGDRSLITTYEKVEKNTDPTELMKKHDEAIRIENALSGLSEQFIEA
KHPTPFMYANNYLTGYAEDIEFVLDIGWGPWHEVGHIHQQVGETTVNIYSLAVQL
>Bac_thu_228969551 C3DVW8_BACTS/82-377 no comment
SPYEPTGLYAKSNEQITINGNQDIQVYIGTYLKPGINTIQSPNGGMIYFYIRTTITTGTT
TPFFELGKAHAVELKGERVLITASPARIKKTDPVQLLKKMDEATRIQDKVAGLSEHYVEE
NHSPYYMYATSYRTAYVGDIQYVLDIGWGPWHEAGHLRQQSTEVQNNIYSLSVEK
>Bac_ant_30265105 no comment
SPYEPTGIYVKPDEEVVIQGTQQIKAYIGTYLHPGENKISSSNGGLLYFYVVAKVKKGTP
NPLFILGKPYAIEMKGENSLLTMPETVAEHEDPAALLKKHDEIINIEHKMSGLSKHFVED
WYTDDYMYATYYRTAYSKGLESVLNLGWGPWHEVGHQHQQDGEVTVNIYSLAVQT
>Asp_fla_238482345 |ref|XP_002372411.1| viral-enhancing factor, putative [Aspergillus flavus NRRL3357]
HDRQHLSIVLAAGQTIKARQTGELTLRLSDWAELSASVVSVPFNAAVEPVVEYEYPDGSQ
LPVYRKGGSEFALLDSSYTQVLVPRHPQEVDNIDGLIGYYESVFSFYNALAGLSFEMKAD
KHGAGGAYYGQNWTAASTNAIKEWWSNWGNLHEIGHGYQMNGEVSNNVYAALYQS
>Clo_per_182626527 |ref|ZP_02954276.1| LRR adjacent family [Clostridium perfringens D str. JGS1721]
HGREPLGFILPANVEFQIRQNKNLTLDLGEWVTVSSASLSAPFSGEQVPEVEFILRGEVK
LPIYRTGDSNFAFIENDRVQMLIPRNMNDFSSIDELFKFYDEMFNTYDRLLGLEKNIKAD
KHGAGAAYYSSNYTAQNSDSMSAYL-GWLPLHEVGHGYEYLVDVFNNILAHTYQS
>Bac_cer_229174064 |ref|ZP_04301600.1| Metallprotease, enhancin [Bacillus cereus MM3]
HDRQDLGFILQRNTPLKVRQKNKLTVRLNEWVTIQGDTPLVPFGGEERAILEYQVENKSP
LPIYKQQDGEYALIQGESFQLFVPRSLKDFQSLDELIAYYEDIFKMYDSIIGLDGSLKAD
ISGAGGAYYGANWTANSTDSTKMWLLSWGTLHEIAHGYQATGEVSNNLFGVQYQY
>Bac_thu_228922105 |ref|ZP_04085415.1| Metallprotease, enhancin [Bacillus thuringiensis serovar huazhongensis BGSC 4BD1]
HDRQDLGLILQRNTPLKVRQKDKLTLRLNEWVTIQGDTPLVPF-GEEHAVLEYQVGNESP
LPIYKQQDGEYALIQGESFQLFVPRSLKDFQSLDELIAYYEDIFAMYDSIIGLDGSLKAD
ISGAGGAYYGTNWTANSSDSTKMWLLSWGTLHEIAHGYQATGEVSNNLFGVQYQY
