# Supplementary material for: A Novel Extracellular Metallopeptidase Domain Shared by Animal Host-Associated Mutualistic and Pathogenic Microbes
Source: PLoS One. 2012 Jan 27;7(1):e30287. doi: 10.1371/journal.pone.0030287 (PMC3267712; doi:10.1371/journal.pone.0030287)
Supplement: Table S2 — Table listing all 523 RefSeq protein entries positive for the PF13402 profile (HMMER search, e-value ≤1.00E-05) contrasting the PSI-Blast values with HMMER scores for the PF13402 and PF03272 profiles. The sequences for the gluzincin and zincin motif are also shown. Format: Excel file with five worksheets. (XLSX) [file pone.0030287.s009.xlsx]

## Sheet: PSI-Blast HMMER PF13402&PF03272
PSI-Blast ReSeq accession	PSI-Blast e-value	PSI-Blast score	M60 enhancin PF03272 ipr e-value	Enhancin PF03272 HMMER E-value	Enhancin PF03272 HMMER score	HMMER RefSeq accession	M60-like PF13402 HMMER score	M60-like PF13402 HMMER E-value	PF13402 minus PF03272 HMMER scores	M60-like PF13402 415 dataset	Taxa with proteins hit by PF13402 & PF03272	Taxa	Description	gluzincin-like sequence	HEXXH position	HEXXH motif	gi
YP_001376651.1	1e-83	314	NA	NA	0	YP_001376651.1	321	4.8e-93	321	yes		Bacillus cereus subsp. cytotoxis NVH 391-98	S-layer domain-containing protein	HEVGHVMQMRPMTWGGMTE	[325,329]	HEVGH
ZP_04154891.1	4e-81	306	NA	NA	0	ZP_04154891.1	314	4.8e-91	314	yes		Bacillus pseudomycoides DSM 12442	S-layer domain protein	HEFGHVNQVRPAMKWVSTGE	[377,381]	HEFGH
XP_001057103.1	4e-87	326	NA	NA	0	XP_001057103.1	308	4.4e-89	308	yes		Rattus norvegicus	PREDICTED: hypothetical protein	HEIAHGYQAGFDNQGIFTGE	[264,268]	HEIAH
XP_001072414.1	4e-87	326	NA	NA	0	XP_001072414.1	308	4.9e-89	308	yes		Rattus norvegicus	PREDICTED: hypothetical protein	HEVGHQHQQDTWLWDGLGE	[281,285]	HEVGH
YP_021963.1	4e-85	319	NA	NA	0	YP_021963.1	307	5.5e-89	307	yes	1	Bacillus anthracis str. 'Ames Ancestor'	hypothetical protein GBAA5305	HEVGHQHQQDTWLWDGLGE	[281,285]	HEVGH
ZP_05186275.1	1e-85	321	NA	NA	0	ZP_05186275.1	307	5.1e-89	307	yes	1	Bacillus anthracis str. A1055	wall-associated protein	HEIAHGYQAGFDNQGIFTGE	[264,268]	HEIAH
ZP_00390010.1	8e-85	318	NA	NA	0	ZP_00390010.1	307	5.2e-89	307	yes	1	Bacillus anthracis str. A2012	hypothetical protein Bant_01000177	HEVGHQHQQDTWLWDGLGE	[281,285]	HEVGH
NP_847482.1	4e-85	319	NA	NA	0	NP_847482.1	307	5.5e-89	307	yes	1	Bacillus anthracis str. Ames	hypothetical protein BA_5305	HEIAHGYQAGFDNQGIFTGE	[264,268]	HEIAH
ZP_05208995.1	4e-85	319	NA	NA	0	ZP_05208995.1	307	5.5e-89	307	yes	1	Bacillus anthracis str. Australia 94	hypothetical protein BantA9_01517	HEVGHQHQQDTWLWDGLGE	[281,285]	HEVGH
YP_002817846.1	4e-85	319	NA	NA	0	YP_002817846.1	307	5.5e-89	307	yes	1	Bacillus anthracis str. CDC 684	hypothetical protein BAMEG_5358	HEIAHGYQAGFDNQGIFTGE	[264,268]	HEIAH
ZP_05150351.1	4e-85	319	NA	NA	0	ZP_05150351.1	307	5.5e-89	307	yes	1	Bacillus anthracis str. CNEVA-9066	hypothetical protein BantC_21900	HEIAHGYQAGFDNQGIFTGE	[264,268]	HEIAH
ZP_05201895.1	4e-85	319	NA	NA	0	ZP_05201895.1	307	5.5e-89	307	yes	1	Bacillus anthracis str. Kruger B	hypothetical protein BantKB_24984	HEVGHQHQQDTWLWDGLGE	[281,285]	HEVGH
YP_031170.1	4e-85	319	NA	NA	0	YP_031170.1	307	5.5e-89	307	yes	1	Bacillus anthracis str. Sterne	hypothetical protein BAS4929	HEIAHGYQAGFDNQGIFTGE	[264,268]	HEIAH
ZP_05203030.1	4e-85	319	NA	NA	0	ZP_05203030.1	307	5.5e-89	307	yes	1	Bacillus anthracis str. Vollum	hypothetical protein BantV_00927	HEVGHQHQQDTWLWDGLGE	[281,285]	HEVGH
ZP_05193406.1	4e-85	319	NA	NA	0	ZP_05193406.1	307	5.5e-89	307	yes	1	Bacillus anthracis str. Western North Ameri	hypothetical protein BantWNA_11134	HEIAHGYQAGFDNQGIFTGE	[264,268]	HEIAH
ZP_04248750.1	7e-84	315	NA	NA	0	ZP_04248750.1	306	1.1e-88	306	yes	1	Bacillus cereus Rock1-3	S-layer domain protein	HEIAHGYQAGFDNQGIFTGE	[255,259]	HEIAH
YP_003244705.1	4e-94	349	NA	0.00024	14.3	YP_003244705.1	320	1e-92	305.7	yes		Geobacillus sp. Y412MC10	hypothetical protein GYMC10_4678	HEIGHCYQHPFNWRSMSE	[458,462]	HEIGH	261408464
ZP_04248460.1	5e-78	295	NA	NA	0	ZP_04248460.1	305	3.8e-88	305	yes	1	Bacillus cereus Rock1-3	Fibronectin type III domain protein	HEAGHARQQYPWTWNDLRGMGE	[272,276]	HEAGH
ZP_04237054.1	1e-78	298	NA	NA	0	ZP_04237054.1	305	3.4e-88	305	yes	1	Bacillus cereus Rock3-28	Fibronectin type III domain protein	HEAGHLRQQWPWNFYNMTEVQNNIYSLSVE	[296,300]	HEAGH
			NA	NA	0	ZP_04231422.1	305	3.4e-88	305	yes	1	Bacillus cereus Rock3-29	Fibronectin type III domain protein	HEAGHLRQQSPWKFYNMTEVQNNIYSLSVE	[296,300]	HEAGH
NP_001088165.1	2e-86	323	NA	NA	0	NP_001088165.1	303	1.1e-87	303	yes		Xenopus laevis	hypothetical protein LOC494989	HEVGHLHQQAPWEWEDLGE	[291,295]	HEVGH
XP_001092570.1	2e-92	343	NA	0.059	6.4	XP_001092570.1	309	1.3e-89	302.6	yes		Macaca mulatta	PREDICTED: hypothetical protein	HEIAHGYQAGFDNQGIFTGE	[264,268]	HEIAH	109068737
XP_001490568.1	8e-89	331	NA	NA	0	XP_001490568.1	302	2.8e-87	302	yes		Equus caballus	PREDICTED: similar to Protein FAM139A	HEVGHLHQQEPWKWSKVRE	[288,292]	HEVGH
XP_519453.2	1e-92	344	NA	0.11	5.5	XP_519453.2	307	6.9e-89	301.5	yes		Pan troglodytes	PREDICTED: hypothetical protein	HEIAHGYQAGFDNQGIFTGE	[264,268]	HEIAH	114616552
NP_001082796.1	4e-91	339	NA	NA	0	NP_001082796.1	301	6e-87	301	yes		Danio rerio	hypothetical protein LOC323315	HEIAHGYQAGFDDQGMYTGE	[264,268]	HEIAH
ZP_04093101.1	5e-87	325	NA	NA	0	ZP_04093101.1	300	8.1e-87	300	yes	1	Bacillus thuringiensis serovar pondicheriensis BGSC 4BA1	hypothetical protein bthur0010_47730	HEAGHLRQQSPWKFYNMTEVQNNIYSLSVE	[322,326]	HEAGH
ZP_04253786.1	3e-87	326	NA	NA	0	ZP_04253786.1	299	2.2e-86	299	yes	1	Bacillus cereus 95/8201	hypothetical protein bcere0016_48850	HEAGHARQQYPWTWNDLRGMGE	[286,290]	HEAGH
ZP_04155012.1	1e-77	294	NA	NA	0	ZP_04155012.1	299	2.4e-86	299	yes		Bacillus pseudomycoides DSM 12442	Fibronectin type III domain protein	HEIAHGYQAGFDNQGIFTGE	[265,269]	HEIAH
XP_539847.2	1e-89	334	NA	NA	0	XP_539847.2	299	2.7e-86	299	yes		Canis familiaris	PREDICTED: hypothetical protein XP_539847	HEIAHGYQAGFDNQGIFTGE	[275,279]	HEIAH
NP_001123498.1	1e-68	264	NA	NA	0	NP_001123498.1	299	2.4e-86	299	yes		Homo sapiens	hypothetical protein LOC285966 isoform B	HEVGHQHQQDTWLWDGLGE	[281,285]	HEVGH
ZP_04300725.1	3e-76	289	NA	NA	0	ZP_04300725.1	298	4.9e-86	298	yes	1	Bacillus cereus MM3	Fibronectin type III domain protein	HEVGHLHQQIPWLSKGMGE	[290,294]	HEVGH
NP_001123497.1	1e-68	264	NA	NA	0	NP_001123497.1	297	6.2e-86	297	yes		Homo sapiens	hypothetical protein LOC285966 isoform A	HEAGHARQQYPWTWNDLRGMGE	[272,276]	HEAGH
			NA	NA	0	NP_775949.2	297	6.2e-86	297	yes		Homo sapiens	hypothetical protein LOC285966 isoform A	HEIAHGYQAGFDNQGIFTGE	[264,268]	HEIAH
ZP_03133174.1	2e-96	356	NA	0.0048	10	ZP_03133174.1	306	1.2e-88	296	yes		Chthoniobacter flavus Ellin428	conserved hypothetical protein	HEVGHLHQQEPWKWSKVRE	[291,295]	HEVGH	196234345
YP_002454094.1	1e-86	324	NA	NA	0	YP_002454094.1	296	1.1e-85	296	yes	1	Bacillus cereus AH820	wall-associated protein	HEMGHQRQPNPWTWNGLGE	[284,288]	HEMGH
XP_002190961.1	3e-89	333	NA	NA	0	XP_002190961.1	296	1.7e-85	296	yes		Taeniopygia guttata	PREDICTED: similar to Protein FAM115C	HEAGHLRQQSPWKFYNMTEVQNNIYSLSVE	[296,300]	HEAGH
NP_666286.1	4e-90	335	NA	0.015	8.4	NP_666286.1	304	5.3e-88	295.6	yes		Mus musculus	hypothetical protein LOC232748	HEVGHLHQQEPWKWSKVRE	[288,292]	HEVGH	22122713
XP_001923464.1	2e-93	347	NA	NA	0	XP_001923464.1	295	3e-85	295	yes		Danio rerio	PREDICTED: hypothetical protein	HEAGHARQQYPWTWNDLRGMGE	[288,292]	HEAGH
XP_683284.3	7e-94	348	NA	NA	0	XP_683284.3	295	4.5e-85	295	yes		Danio rerio	PREDICTED: hypothetical protein	HEAGHKRQQQPWTWDDRRGTWE	[299,303]	HEAGH
ZP_03234378.1	4e-76	289	NA	NA	0	ZP_03234378.1	294	4.8e-85	294	yes	1	Bacillus cereus AH1134	fibronectin type III domain protein	HEAGHLRQQSPWKFYNMTEVQNNIYSLSVE	[296,300]	HEAGH
ZP_04191382.1	2e-77	293	NA	NA	0	ZP_04191382.1	293	1.3e-84	293	yes	1	Bacillus cereus AH676	Fibronectin type III domain protein	HEVGHLHQQAPWQWTGMGE	[291,295]	HEVGH
YP_002366602.1	6e-78	295	NA	NA	0	YP_002366602.1	293	1.4e-84	293	yes	1	Bacillus cereus B4264	S-layer domain protein	HEAGHQRQQTWKWSGLTE	[286,290]	HEAGH
ZP_04238966.1	2e-77	293	NA	NA	0	ZP_04238966.1	293	1.3e-84	293	yes	1	Bacillus cereus Rock1-15	Fibronectin type III domain protein	HEIAHGYQAGFDNQGIFTGE	[266,270]	HEIAH
ZP_04138897.1	2e-77	293	NA	NA	0	ZP_04138897.1	293	1.3e-84	293	yes	1	Bacillus thuringiensis Bt407	Fibronectin type III domain protein	HEVGHLHQQEPWKWSKVRE	[291,295]	HEVGH
ZP_04140245.1	2e-40	171	NA	NA	0	ZP_04132535.1	293	1.3e-84	293	yes	1	Bacillus thuringiensis serovar thuringiensis str. T01001	Fibronectin type III domain protein	HEAGHLRQQSPWKFYNMTEVQNNIYSLSVE	[296,300]	HEAGH
ZP_04171806.1	7e-82	308	7.9e-07	NA	0	ZP_04171806.1	292	2.6e-84	292	yes		Bacillus mycoides DSM 2048	S-layer domain protein	HEVGHLHQQAPWFWSGIGE	[292,296]	HEVGH
ZP_04320752.1	1e-74	285	NA	NA	0	ZP_04320752.1	290	9.8e-84	290	yes	1	Bacillus cereus ATCC 10876	Fibronectin type III domain protein	HEAGHTRQQNPWTWASNGMTE	[296,300]	HEAGH
ZP_04278345.1	2e-77	293	NA	NA	0	ZP_04278345.1	290	9.3e-84	290	yes		Bacillus cereus m1550	Fibronectin type III domain protein	HEAGHMRQQTPWNFKNMTEVQVNLYSLAVE	[276,280]	HEAGH
XP_683371.3	3e-94	349	NA	NA	0	XP_683371.3	289	2.6e-83	289	yes		Danio rerio	PREDICTED: hypothetical protein	HEAGHARQQYPWTWNDLRGMGE	[272,276]	HEAGH
YP_002155459.1	1e-51	208	NA	NA	0	YP_002155459.1	289	1.7e-83	289	yes		Vibrio fischeri MJ11	inner membrane lipoprotein	HEAGHTKQQYPWTWDGVVE	[296,300]	HEAGH
NP_001095394.1	2e-87	327	NA	NA	0	NP_001095394.1	288	4.1e-83	288	yes		Bos taurus	hypothetical protein LOC510320	HEIAHGYQAGFDNQGIFTGE	[275,279]	HEIAH
NP_001092524.1	5e-94	349	NA	NA	0	NP_001092524.1	287	8.4e-83	287	yes		Bos taurus	hypothetical protein LOC533126	HEVGHLHQQEPWKWSKVRE	[291,295]	HEVGH
NP_001126070.1	3e-72	276	NA	NA	0	NP_001126070.1	287	1.2e-82	287	yes		Pongo abelii	hypothetical protein LOC100173022	HEAGHARQQYPWTWNDLRGMGE	[272,276]	HEAGH
ZP_04231342.1	3e-80	303	NA	NA	0	ZP_04231342.1	286	1.8e-82	286	yes	1	Bacillus cereus Rock3-29	Fibronectin type III domain protein	HEAGHARQQYPWTWNDLRGMGE	[32,36]	HEAGH
ZP_04071470.1	1e-76	291	NA	NA	0	ZP_04071470.1	286	1.4e-82	286	yes		Bacillus thuringiensis IBL 200	Fibronectin type III domain protein	HEVGHLHQQAPWFWSGVGE	[291,295]	HEVGH
ZP_01959759.1	4e-64	249	NA	NA	0	ZP_01959759.1	286	2.5e-82	286	yes		Bacteroides caccae ATCC 43185	hypothetical protein BACCAC_01368	HEAGHARQQYPWTWNDLRGMGE	[32,36]	HEAGH
NP_055534.1	3e-93	346	NA	NA	0	NP_055534.1	286	1.6e-82	286	yes		Homo sapiens	hypothetical protein LOC9747	HEIAHGYQAGFDNQGIFTGE	[264,268]	HEIAH
NP_084206.1	1e-91	340	NA	NA	0	NP_084206.1	286	1.4e-82	286	yes		Mus musculus	hypothetical protein LOC77574	HEVGHLHQQAPWFWSGVGE	[291,295]	HEVGH
XP_519454.2	3e-93	346	NA	NA	0	XP_519454.2	286	1.6e-82	286	yes		Pan troglodytes	PREDICTED: similar to KIAA0738 protein	HEVGHLHQQEPWKWSKVRE	[291,295]	HEVGH
NP_001009534.1	1e-87	327	NA	NA	0	NP_001009534.1	286	1.4e-82	286	yes		Rattus norvegicus	experimental autoimmune prostatitis antigen 2 homolog	HEAGHLRQQSPWKFYNMTEVQNNIYSLSVE	[296,300]	HEAGH
XP_342676.3	5e-91	339	NA	NA	0	XP_342676.3	285	2.9e-82	285	yes		Rattus norvegicus	PREDICTED: hypothetical protein	HEIAHGYQAGFDNQGIFTGE	[275,279]	HEIAH
XP_001072497.1	5e-91	339	NA	NA	0	XP_001072497.1	285	3e-82	285	yes		Rattus norvegicus	PREDICTED: hypothetical protein	HEAGHLRQQSPWKFYNMTEVQNNIYSLSVE	[296,300]	HEAGH
ZP_01955015.1	1e-56	225	NA	NA	0	ZP_01955015.1	285	3.3e-82	285	yes		Vibrio cholerae MZO-3	accessory colonization factor AcfD	HEVGHLHQQAPWFWSGVGE	[303,307]	HEVGH
ZP_04225257.1	4e-93	345	NA	3e-09	30.5	ZP_04225257.1	315	1.9e-91	284.5	yes	1	Bacillus cereus Rock3-42	hypothetical protein bcere0021_48880	HELGHNHQSPPFTMEGQTEVSVNIFSMVCE	[495,499]	HELGH	229094178
YP_039079.1	2e-93	347	NA	1.8e-08	28	YP_039079.1	312	2.1e-90	284	yes	1	Bacillus thuringiensis serovar konkukian str. 97-27	wall-associated protein	HEIGHGYQMSFRNDRYFWNGE	[247,251]	HEIGH	49481519
ZP_04236724.1	2e-77	293	NA	NA	0	ZP_04236724.1	284	7.3e-82	284	yes	1	Bacillus cereus Rock3-28	Fibronectin type III domain protein	HEIAHGYQAGFDNQGIFTGE	[252,256]	HEIAH
XP_001502235.2	2e-93	347	NA	NA	0	XP_001502235.2	284	8.8e-82	284	yes		Equus caballus	PREDICTED: hypothetical protein	HEAGHLRQQSPWKFYNMTEVQNNIYSLSVE	[296,300]	HEAGH
XP_539846.2	2e-93	347	NA	NA	0	XP_539846.2	283	1.9e-81	283	yes		Canis familiaris	PREDICTED: hypothetical protein XP_539846 isoform 1	HEAGHLRQQSPWKFYNMTEVQNNIYSLSVE	[276,280]	HEAGH
XP_848591.1	2e-93	347	NA	NA	0	XP_848591.1	283	1.9e-81	283	yes		Canis familiaris	PREDICTED: hypothetical protein XP_843498 isoform 2	HEVGHLHQQAPWFWSGIGE	[292,296]	HEVGH
ZP_04005476.1	2e-70	270	NA	NA	0	ZP_04005476.1	283	1.7e-81	283	yes		Escherichia coli 83972	lipoprotein AcfD precursor	HEIAHGYQAGFDNQGIFTGE	[264,268]	HEIAH
ZP_03043208.1	3e-70	270	NA	NA	0	ZP_03043208.1	283	1.6e-81	283	yes		Escherichia coli E22	conserved hypothetical protein	HEVGHLHQQAPWFWSGVGE	[303,307]	HEVGH
YP_002409370.1	1e-70	271	NA	NA	0	YP_002409370.1	283	1.7e-81	283	yes		Escherichia coli IAI39	inner membrane lipoprotein	HEVGHLHQQAPWEWEDLGE	[291,295]	HEVGH
YP_003236130.1	3e-71	273	NA	NA	0	YP_003236130.1	283	1.7e-81	283	yes		Escherichia coli O111:H- str. 11128	putative lipoprotein AcfD homolog precursor	HEVGHLHQQEPWKWSKVRE	[290,294]	HEVGH
YP_002414113.1	2e-70	270	NA	NA	0	YP_002414113.1	283	1.7e-81	283	yes		Escherichia coli UMN026	inner membrane lipoprotein	HEIAHGYQAGFDNQGIFTGE	[255,259]	HEIAH
ZP_04872202.1	4e-71	273	NA	NA	0	ZP_04872202.1	283	1.1e-81	283	yes		Escherichia sp. 1_1_43	conserved hypothetical protein	HEAGHLRQQVPWRFYNMGEVQNNIYSLAVE	[282,286]	HEAGH
XP_001521332.1	4e-87	325	NA	NA	0	XP_001521332.1	283	1.1e-81	283	yes		Ornithorhynchus anatinus	PREDICTED: similar to BC011487 protein	HEAGHLRQQSPWKFYNMTEVQNNIYSLSVE	[296,300]	HEAGH
NP_981933.1	5e-87	325	NA	0.53	3.3	NP_981933.1	286	1.5e-82	282.7	yes		Mus musculus	experimental autoimmune prostatitis antigen 2	HEVGHLHQQAPWFWSGIGE	[292,296]	HEVGH	42794267
ZP_03068889.1	1e-70	271	NA	NA	0	ZP_03068889.1	282	2.1e-81	282	yes		Escherichia coli 101-1	conserved hypothetical protein	HEIAHGYQAGFDNQGIFTGE	[264,268]	HEIAH
YP_002294524.1	2e-70	270	NA	NA	0	YP_002294524.1	282	2.3e-81	282	yes		Escherichia coli SE11	hypothetical protein ECSE_3249	HEAGHLRQQWPWNFYNMTEVQNNIYSLSVE	[296,300]	HEAGH
ZP_05438313.1	2e-69	267	NA	NA	0	ZP_05438313.1	282	3.1e-81	282	yes		Escherichia sp. 4_1_40B	inner membrane lipoprotein	HEAGHLRQQVPWRFYNMGEVQNNIYSLAVE	[295,299]	HEAGH
YP_002447016.1	6e-82	308	NA	7.3e-09	29.3	YP_002447016.1	311	5.9e-90	281.7	yes		Bacillus cereus G9842	S-layer domain protein	HEIGHGYQMSFRNDRYFWNGE	[247,251]	HEIGH	218898605
ZP_04068100.1	1e-81	307	NA	6.9e-09	29.3	ZP_04068100.1	311	5.9e-90	281.7	yes		Bacillus thuringiensis IBL 4222	S-layer domain protein	HELGHQRQITRTWSWRAMTEVTVNIYSLANLRE	[500,504]	HELGH	228903993
ZP_04428328.1	2e-87	327	NA	0.00075	12.7	ZP_04428328.1	294	6.7e-85	281.3	yes		Planctomyces limnophilus DSM 3776	hypothetical protein PlimDRAFT_30570	HEAGHKRQQQPWTWDDRRGTWE	[299,303]	HEAGH	229539192
ZP_04122922.1	4e-94	349	NA	1.4e-07	25	ZP_04122922.1	306	1.6e-88	281	yes	1	Bacillus thuringiensis serovar pakistani str. T13001	hypothetical protein bthur0005_47520	HEVGHLHQQEPWKWSKVRE	[291,295]	HEVGH	228961305
ZP_04247877.1	1e-78	298	NA	NA	0	ZP_04247877.1	281	6.4e-81	281	yes	1	Bacillus cereus Rock1-3	hypothetical protein bcere0017_47900	HEIAHGYQAGFDNQGIFTGE	[264,268]	HEIAH
YP_670934.1	3e-69	266	NA	NA	0	YP_670934.1	281	6e-81	281	yes		Escherichia coli 536	putative lipoprotein AcfD precursor	HEVGHIHQQVPWLSEGMGE	[290,294]	HEVGH
YP_003046028.1	5e-70	269	NA	NA	0	YP_003046028.1	281	6.1e-81	281	yes		Escherichia coli B str. REL606	predicted inner membrane lipoprotein	HEIAHGYQAGFDNQGIFTGE	[264,268]	HEIAH
YP_003035019.1	7e-71	272	NA	NA	0	YP_003035019.1	281	6.8e-81	281	yes		Escherichia coli BL21(DE3)	lipoprotein AcfD-like protein	HEVGHLHQQAPWFWSGVGE	[291,295]	HEVGH
YP_002927888.1	7e-71	272	NA	NA	0	YP_002927888.1	281	6.8e-81	281	yes		Escherichia coli BW2952	putative inner membrane lipoprotein	HEAGHLRQQSPWKFYNMTEVQNNIYSLSVE	[296,300]	HEAGH
ZP_03033388.1	7e-70	268	NA	NA	0	ZP_03033388.1	281	5.7e-81	281	yes		Escherichia coli F11	conserved hypothetical protein	HEVGHLHQQAPWFWSGIGE	[292,296]	HEVGH
YP_026189.1	7e-71	272	NA	NA	0	YP_026189.1	281	6.8e-81	281	yes		Escherichia coli str. K-12 substr. MG1655	predicted inner membrane lipoprotein	HEVGHLHQQEPWKWSKVRE	[291,295]	HEVGH
			NA	NA	0	AP_003528.1	281	6.8e-81	281	yes		Escherichia coli str. K-12 substr. W3110	predicted inner membrane lipoprotein	HEAGHARQQYPWTWNDLRGMGE	[272,276]	HEAGH
ZP_05432974.1	4e-70	269	NA	NA	0	ZP_05432974.1	281	6.3e-81	281	yes		Shigella sp. D9	hypothetical protein ShiD9_09354	HEVGHQHQQDTWLWDGLGE	[281,285]	HEVGH
ZP_03967680.1	2e-50	204	NA	NA	0	ZP_03967680.1	281	4.4e-81	281	yes		Sphingobacterium spiritivorum ATCC 33300	lipoprotein	HEVGHLHQQVPWQWDGLGE	[303,307]	HEVGH
ZP_04777486.1	1e-49	201	NA	NA	0	ZP_04777486.1	281	4.4e-81	281	yes		Sphingobacterium spiritivorum ATCC 33861	lipoprotein	HEIAHGYQAGFDNQGIFTGE	[255,259]	HEIAH
NP_981496.1	2e-94	350	NA	3.9e-09	30.2	NP_981496.1	311	5.2e-90	280.8	yes		Bacillus cereus ATCC 10987	hypothetical protein BCE_5203	HELGHQRQITRTWSWRAMTEVTVNIYSLANLRE	[500,504]	HELGH	42784249
ZP_04325889.1	2e-93	347	NA	7.4e-09	29.2	ZP_04325889.1	310	7.6e-90	280.8	yes		Bacillus cereus m1293	hypothetical protein bcere0001_47200	HEIAHGYQAGFDNQGIFTGE	[264,268]	HEIAH	229199209
ZP_04129181.1	2e-93	347	NA	5.9e-08	26.3	ZP_04129181.1	307	5e-89	280.7	yes		Bacillus thuringiensis serovar sotto str. T040	hypothetical protein bthur0004_49610	HEVGHQHQQDTWLWDGLGE	[272,276]	HEVGH	228968180
ZP_04264662.1	3e-87	326	NA	2.1e-07	24.4	ZP_04264662.1	305	2.2e-88	280.6	yes		Bacillus cereus BDRD-ST196	hypothetical protein bcere0014_47770	HEVGHLHQQEPWKWSKVRE	[291,295]	HEVGH	229135898
YP_854419.1	5e-68	262	NA	NA	0	YP_854419.1	280	1.5e-80	280	yes		Escherichia coli APEC O1	putative lipoprotein AcfD-like precursor	HEVGHLHQQEPWKWSKVRE	[291,295]	HEVGH
ZP_03030866.1	1e-71	274	NA	NA	0	ZP_03030866.1	280	9.6e-81	280	yes		Escherichia coli B7A	conserved hypothetical protein	HEIAHGYQAGFDNQGIFTGE	[275,279]	HEIAH
ZP_03048261.1	5e-70	269	NA	NA	0	ZP_03048261.1	280	1.4e-80	280	yes		Escherichia coli E110019	hypothetical protein EcE110019_1447	HEVGHQHQQDTWLWDGLGE	[281,285]	HEVGH
YP_002330723.1	1e-68	264	NA	NA	0	YP_002330723.1	280	1e-80	280	yes		Escherichia coli O127:H6 str. E2348/69	predicted inner membrane lipoprotein	HEAGHLRQQSPWKFYNMTEVQNNIYSLSVE	[296,300]	HEAGH
YP_002392955.1	4e-68	263	NA	NA	0	YP_002392955.1	280	1.5e-80	280	yes		Escherichia coli S88	inner membrane lipoprotein	HEAGHLRQQSPWKFYNMTEVQNNIYSLSVE	[296,300]	HEAGH
YP_542367.1	5e-68	262	NA	NA	0	YP_542367.1	280	1.5e-80	280	yes		Escherichia coli UTI89	putative lipoprotein AcfD-like precursor	HEVGHLHQQEPWKWSKVRE	[291,295]	HEVGH
ZP_04536768.1	5e-68	262	NA	NA	0	ZP_04536768.1	280	1.5e-80	280	yes		Escherichia sp. 3_2_53FAA	conserved hypothetical protein	HEAGHMRQQAPWNFKNMTEVQVNLYSLAVE	[297,301]	HEAGH
XP_001509330.1	2e-87	327	NA	NA	0	XP_001509330.1	280	9.4e-81	280	yes		Ornithorhynchus anatinus	PREDICTED: similar to seven transmembrane helix receptor	HEAGHARQQYPWTWNDLRGMGE	[2,6]	HEAGH
ZP_01985049.1	5e-54	216	NA	NA	0	ZP_01985049.1	280	1.4e-80	280	yes		Vibrio harveyi HY01	AcfD	HEIAHGYQAGFDNQGIFTGE	[273,277]	HEIAH
YP_001647664.1	2e-93	346	NA	9.4e-07	22.3	YP_001647664.1	302	2.4e-87	279.7	yes		Bacillus weihenstephanensis KBAB4	wall-associated protein precursor	HEVGHLHQQEPWKWSKVRE	[291,295]	HEVGH	163942780
YP_001878593.1	2e-50	204	NA	NA	0	YP_001878593.1	279	2.3e-80	279	yes		Akkermansia muciniphila ATCC BAA-835	putative lipoprotein	HEFGHGNQVAQMKGNGWTE	[675,679]	HEFGH
ZP_02998968.1	9e-71	271	NA	NA	0	ZP_02998968.1	279	2.5e-80	279	yes		Escherichia coli 53638	conserved hypothetical protein	HEFGHVNQVRPGLKWHGTTE	[260,264]	HEFGH
YP_001459760.1	2e-69	267	NA	NA	0	YP_001459760.1	279	2.4e-80	279	yes		Escherichia coli HS	hypothetical protein EcHS_A3142	HEVGHCNQTRPGLKWAGLTE	[589,593]	HEVGH
YP_001745231.1	2e-69	267	NA	NA	0	YP_001745231.1	279	2.4e-80	279	yes		Escherichia coli SMS-3-5	hypothetical protein EcSMS35_3251	HEIGHCNQTRPGLKWHGLTE	[664,668]	HEIGH
ZP_05908271.1	2e-55	221	NA	NA	0	ZP_05908271.1	279	3.2e-80	279	yes		Vibrio parahaemolyticus AQ4037	inner membrane lipoprotein	HEFGHGNQVAQMKGAGWAE	[669,673]	HEFGH
ZP_04297480.1	6e-92	342	NA	5.3e-07	23.1	ZP_04297480.1	302	3.3e-87	278.9	yes		Bacillus cereus AH621	hypothetical protein bcere0007_47240	HEVGHQHQQDTWLWEGLGE	[281,285]	HEVGH	229169782
ZP_04168944.1	4e-83	312	5.9e-06	7e-09	29.3	ZP_04168944.1	308	4.5e-89	278.7	yes		Bacillus mycoides DSM 2048	S-layer domain protein	HEIAHGYQAGFDNQGIFTGE	[264,268]	HEIAH	229011762
ZP_04130357.1	4e-81	306	NA	6.5e-09	29.4	ZP_04130357.1	308	3.6e-89	278.6	yes		Bacillus thuringiensis serovar sotto str. T040	hypothetical protein bthur0004_62240	HEIAHGYQAGFDNQGIFTGE	[264,268]	HEIAH	228969551
ZP_04200035.1	4e-92	342	NA	4.5e-07	23.4	ZP_04200035.1	302	3.2e-87	278.6	yes		Bacillus cereus AH603	hypothetical protein bcere0026_47920	HEAGHLRQQSPWKFYNMTEVQNNIYSLSVE	[296,300]	HEAGH	229062729
ZP_04140386.1	2e-80	304	6.2e-06	2e-08	27.8	ZP_04140386.1	306	1.5e-88	278.2	yes	1	Bacillus thuringiensis Bt407	S-layer domain protein	HEVGHLHQQAPWFWSGIGE	[292,296]	HEVGH	228980070
ZP_04103158.1	2e-80	304	6.2e-06	2e-08	27.8	ZP_04103158.1	306	1.5e-88	278.2	yes	1	Bacillus thuringiensis serovar berliner ATCC 10792	S-layer domain protein	HEVGHIHQQVPWLSEGMGE	[290,294]	HEVGH	228940592
ZP_04134096.1	2e-80	304	6.2e-06	2e-08	27.8	ZP_04134096.1	306	1.5e-88	278.2	yes	1	Bacillus thuringiensis serovar thuringiensis str. T01001	S-layer domain protein	HEIAHGYQAGFDNQGIFTGE	[264,268]	HEIAH	228973512
ZP_04303264.1	1e-89	334	NA	4.8e-09	29.9	ZP_04303264.1	308	3.4e-89	278.1	yes	1	Bacillus cereus MM3	hypothetical protein bcere0006_48340	HEIAHGYQAGFDNQGIFTGE	[264,268]	HEIAH	229175758
ZP_04160383.1	2e-76	290	NA	1.4e-07	25	ZP_04160383.1	303	1e-87	278	yes		Bacillus mycoides Rock3-17	Fibronectin type III domain protein	HEAGHARQQYPWTWNDLRGMGE	[272,276]	HEAGH	229000913
ZP_04233797.1	8e-81	305	NA	7.1e-09	29.3	ZP_04233797.1	307	7.5e-89	277.7	yes	1	Bacillus cereus Rock3-28	S-layer domain protein	HEVGHQHQQDTWLWDGLGE	[281,285]	HEVGH	229103110
ZP_04228026.1	3e-83	313	1.1e-05	6.2e-09	29.5	ZP_04228026.1	307	8.4e-89	277.5	yes	1	Bacillus cereus Rock3-29	S-layer domain protein	HEIAHGYQAGFDNQGIFTGE	[264,268]	HEIAH	229097059
ZP_04245415.1	4e-83	312	1.1e-05	6e-09	29.6	ZP_04245415.1	307	8e-89	277.4	yes	1	Bacillus cereus Rock1-3	S-layer domain protein	HEIAHGYQAGFDNQGIFTGE	[264,268]	HEIAH	229116021
ZP_04111067.1	5e-93	345	NA	5.8e-09	29.6	ZP_04111067.1	307	7.5e-89	277.4	yes	1	Bacillus thuringiensis serovar monterrey BGSC 4AJ1	hypothetical protein bthur0007_49140	HEVGHQHQQDTWLWDGLGE	[281,285]	HEVGH	228948790
YP_001645178.1	5e-84	315	NA	4.6e-09	29.9	YP_001645178.1	307	5e-89	277.1	yes		Bacillus weihenstephanensis KBAB4	S-layer domain-containing protein	HEIAHGYQAGFDNQGIFTGE	[264,268]	HEIAH	163940294
ZP_04842342.1	4e-64	249	NA	NA	0	ZP_04842342.1	277	8.3e-80	277	yes		Bacteroides sp. 3_2_5	conserved hypothetical protein	HELGHIHQTRPGLKWHGMTE	[679,683]	HELGH
YP_002404344.1	2e-68	263	NA	NA	0	YP_002404344.1	277	1.3e-79	277	yes		Escherichia coli 55989	inner membrane lipoprotein	HEIGHIHQLAIDWPSSTE	[501,505]	HEIGH
YP_001464429.1	9e-69	265	NA	NA	0	YP_001464429.1	277	1.2e-79	277	yes		Escherichia coli E24377A	hypothetical protein EcE24377A_3432	HEFGHVNQIRPGLKWVSTTE	[650,654]	HEFGH
YP_002399471.1	7e-68	261	NA	NA	0	YP_002399471.1	277	1.1e-79	277	yes		Escherichia coli ED1a	inner membrane lipoprotein	HEIGHVMQMRPWLTWGGMTE	[326,330]	HEIGH
YP_002388453.1	1e-67	261	NA	NA	0	YP_002388453.1	277	1.3e-79	277	yes		Escherichia coli IAI1	inner membrane lipoprotein	HEMGHVHQAAINWPSSTE	[587,591]	HEMGH
YP_002384010.1	1e-67	261	NA	NA	0	YP_002384010.1	277	1.3e-79	277	yes		Escherichia fergusonii ATCC 35469	inner membrane lipoprotein	HEIGHCNQTRLGVMWIGMTEVTNNIMSE	[654,658]	HEIGH
YP_002454093.1	4e-93	346	NA	8.2e-09	29.1	YP_002454093.1	306	1e-88	276.9	yes	1	Bacillus cereus AH820	wall-associated protein	HEVGHLHQQEPWKWSKVRE	[291,295]	HEVGH	218906259
ZP_04099141.1	5e-93	345	NA	8.2e-09	29.1	ZP_04099141.1	306	1.3e-88	276.9	yes	1	Bacillus thuringiensis serovar andalousiensis BGSC 4AW1	hypothetical protein bthur0009_47800	HEAGHLRQQSPWKFYNMTEVQNNIYSLSVE	[296,300]	HEAGH	228936343
ZP_04093100.1	6e-93	345	NA	8.2e-09	29.1	ZP_04093100.1	306	1e-88	276.9	yes	1	Bacillus thuringiensis serovar pondicheriensis BGSC 4BA1	hypothetical protein bthur0010_47720	HEVGHLHQQEPWKWSKVRE	[291,295]	HEVGH	228930090
ZP_04298287.1	5e-83	312	9.9e-06	3.5e-09	30.3	ZP_04298287.1	307	9.6e-89	276.7	yes		Bacillus cereus AH621	S-layer domain protein	HEVGHQHQQDTWLWDGLGE	[281,285]	HEVGH	229170643
ZP_04253785.1	5e-93	345	NA	1.1e-08	28.7	ZP_04253785.1	305	2.5e-88	276.3	yes	1	Bacillus cereus 95/8201	hypothetical protein bcere0016_48840	HEVGHLHQQEPWKWSKVRE	[288,292]	HEVGH	229124600
ZP_00739797.1	9e-81	305	0.021	2e-08	27.9	ZP_00739797.1	304	5.4e-88	276.1	yes		Bacillus thuringiensis serovar israelensis ATCC 35	Wall-associated protein precursor	HEIAHGYQAGFDNQGIFTGE	[264,268]	HEIAH	75759716
YP_212553.1	6e-64	248	NA	NA	0	YP_212553.1	276	2.2e-79	276	yes		Bacteroides fragilis NCTC 9343	putative lipoprotein	HEIGHCNQTRPGVKWIGLTEVTNNIMSE	[663,667]	HEIGH
			NA	NA	0	YP_100380.1	276	2.2e-79	276	yes		Bacteroides fragilis YCH46	hypothetical protein BF3101	HEIGHIHQKAINWPGCTE	[514,518]	HEIGH
ZP_06094201.1	6e-64	248	NA	NA	0	ZP_06094201.1	276	2.2e-79	276	yes		Bacteroides sp. 2_1_16	conserved hypothetical protein	HEIGHIHQRAINWPGSTE	[673,677]	HEIGH
ZP_04087543.1	5e-81	305	NA	8.4e-09	29.1	ZP_04087543.1	305	2.9e-88	275.9	yes	1	Bacillus thuringiensis serovar huazhongensis BGSC 4BD1	S-layer domain protein	HEAGHLRQQSPWKFYNMTEVQNNIYSLSVE	[296,300]	HEAGH	228924290
ZP_04320291.1	4e-89	332	NA	2.2e-10	34.3	ZP_04320291.1	310	6.7e-90	275.7	yes	1	Bacillus cereus ATCC 10876	hypothetical protein bcere0002_49870	HEIAHGYQAGFDNQGIFTGE	[264,268]	HEIAH	229193341
ZP_04142094.1	8e-92	341	NA	4.8e-07	23.3	ZP_04142094.1	299	1.8e-86	275.7	yes	1	Bacillus thuringiensis Bt407	hypothetical protein bthur0002_49580	HEVGHLHQQAPWEWEDLGE	[291,295]	HEVGH	228981799
ZP_04104770.1	8e-92	341	NA	4.8e-07	23.3	ZP_04104770.1	299	1.8e-86	275.7	yes	1	Bacillus thuringiensis serovar berliner ATCC 10792	hypothetical protein bthur0008_48610	HEAGHARQQYPWTWNDLRGMGE	[272,276]	HEAGH	228942230
ZP_04135719.1	8e-92	341	NA	4.8e-07	23.3	ZP_04135719.1	299	1.8e-86	275.7	yes	1	Bacillus thuringiensis serovar thuringiensis str. T01001	hypothetical protein bthur0003_49080				228975160
ZP_04200658.1	5e-83	312	NA	6.3e-09	29.5	ZP_04200658.1	305	3.4e-88	275.5	yes		Bacillus cereus AH603	S-layer domain protein	HEVGHLHQQEPWKWSKVRE	[288,292]	HEVGH	229065404
ZP_04262242.1	2e-82	310	NA	2.9e-09	30.6	ZP_04262242.1	306	1.4e-88	275.4	yes		Bacillus cereus BDRD-ST196	S-layer domain protein	HEIAHGYQAGFDNQGIFTGE	[264,268]	HEIAH	229133414
ZP_02900937.1	1e-67	261	NA	NA	0	ZP_02900937.1	275	3.9e-79	275	yes		Escherichia albertii TW07627	AcfD	HEIGHLHQGAIAWTGCFE	[670,674]	HEIGH
ZP_06155178.1	2e-51	207	NA	NA	0	ZP_06155178.1	275	4.5e-79	275	yes		Photobacterium damselae subsp. damsela	accessory colonization factor AcfD precursor	HEIGHNMDKLGKAE	[1091,1095]	HEIGH
ZP_06177065.1	2e-54	217	NA	NA	0	ZP_06177065.1	275	3.5e-79	275	yes		Vibrio harveyi 1DA3	hypothetical protein VME_34490	HEIGHVHQGAINWASTTE	[569,573]	HEIGH
ZP_03100442.1	7e-87	325	NA	4.5e-07	23.3	ZP_03100442.1	298	3e-86	274.7	yes	1	Bacillus cereus W	wall-associated protein	HEVGHLHQQEPWKWSKVRE	[288,292]	HEVGH	196033029
ZP_03100686.1	2e-92	343	NA	8.2e-09	29.1	ZP_03100686.1	303	1.4e-87	273.9	yes	1	Bacillus cereus W	wall-associated protein	HEIAHGYQAGFDNQGIFTGE	[252,256]	HEIAH	196033273
ZP_04265361.1	8e-77	292	NA	3.4e-08	27.1	ZP_04265361.1	301	3.6e-87	273.9	yes		Bacillus cereus BDRD-ST196	Fibronectin type III domain protein	HEAGHTRQQNPWTWASNGMTE	[296,300]	HEAGH	229136704
ZP_04074710.1	6e-93	345	NA	3.5e-10	33.6	ZP_04074710.1	307	9.6e-89	273.4	yes		Bacillus thuringiensis IBL 200	hypothetical protein bthur0013_50430	HEIAHGYQAGFDNQGIFTGE	[264,268]	HEIAH	228910901
ZP_04309267.1	3e-80	303	NA	1.2e-09	31.9	ZP_04309267.1	305	3.2e-88	273.1	yes	1	Bacillus cereus 172560W	S-layer domain protein	HEAGHMRQQTPWNFKNMTEVQVNLYSLAVE	[296,300]	HEAGH	229181971
ZP_04067686.1	1e-92	344	NA	4.5e-10	33.3	ZP_04067686.1	306	1.7e-88	272.7	yes		Bacillus thuringiensis IBL 4222	hypothetical protein bthur0014_47230	HEAGHLRQQSPWKFYNMTEVQNNIYSLSVE	[296,300]	HEAGH	228903564
ZP_00741467.1	7e-93	345	NA	4.5e-10	33.3	ZP_00741467.1	306	1.7e-88	272.7	yes		Bacillus thuringiensis serovar israelensis ATCC 35	Wall-associated protein precursor	HEAGHARQQYPWTWNDLRGMGE	[286,290]	HEAGH	75761505
YP_002369867.1	1e-91	340	NA	6.4e-09	29.5	YP_002369867.1	302	2.8e-87	272.5	yes	1	Bacillus cereus B4264	wall-associated protein	HEIAHGYQAGFDNQGIFTGE	[255,259]	HEIAH	218232772
ZP_04148407.1	5e-88	329	4.1e-06	8.5e-11	35.7	ZP_04148407.1	308	2.8e-89	272.3	yes	1	Bacillus thuringiensis serovar tochigiensis BGSC 4Y1	hypothetical protein bthur0001_49700	HEIAHGYQAGFDNQGIFTGE	[264,268]	HEIAH	228988313
ZP_04215346.1	1e-80	304	NA	6.8e-10	32.7	ZP_04215346.1	305	2.1e-88	272.3	yes	1	Bacillus cereus Rock4-2	S-layer domain protein	HEVGHLHQQRPWDWDAVGE	[291,295]	HEVGH	229082924
ZP_04194307.1	4e-90	335	NA	4.3e-09	30	ZP_04194307.1	302	2.8e-87	272	yes	1	Bacillus cereus AH676	hypothetical protein bcere0027_47080	HEAGHARQQYPWTWNDLRGMGE	[286,290]	HEAGH	229049750
ZP_03233872.1	1e-79	300	NA	8.7e-10	32.3	ZP_03233872.1	304	5.9e-88	271.7	yes	1	Bacillus cereus AH1134	fibronectin type III domain protein	HEVGHLHQQAPWFWSGIGE	[292,296]	HEVGH	206972950
ZP_03231149.1	3e-90	336	NA	3.2e-09	30.4	ZP_03231149.1	302	2.8e-87	271.6	yes	1	Bacillus cereus AH1134	wall-associated protein	HEIAHGYQAGFDNQGIFTGE	[264,268]	HEIAH	206970196
ZP_04259276.1	2e-90	337	NA	6.7e-09	29.4	ZP_04259276.1	301	3.9e-87	271.6	yes	1	Bacillus cereus BDRD-Cer4	hypothetical protein bcere0015_47530	HEVGHQHQQETWLWDGLGE	[281,285]	HEVGH	229130317
YP_001642566.1	9e-79	298	NA	2e-07	24.5	YP_001642566.1	296	2.2e-85	271.5	yes		Bacillus weihenstephanensis KBAB4	fibronectin type III domain-containing protein	HEIAHGYQAGFDNQGIFTGE	[266,270]	HEIAH	163943336
ZP_04275957.1	1e-90	337	NA	5.5e-09	29.7	ZP_04275957.1	301	3.8e-87	271.3	yes	1	Bacillus cereus BDRD-ST24	hypothetical protein bcere0012_47390	HEVGHLHQQEPWKWSKVRE	[282,286]	HEVGH	229147613
YP_002341115.1	9e-92	341	NA	5.6e-09	29.7	YP_002341115.1	301	3.8e-87	271.3	yes		Bacillus cereus AH187	wall-associated protein	HEVGHLHQQEPWKWSKVRE	[288,292]	HEVGH	217962543
ZP_04270324.1	1e-91	340	NA	5.5e-09	29.7	ZP_04270324.1	301	3.7e-87	271.3	yes		Bacillus cereus BDRD-ST26	hypothetical protein bcere0013_48840	HEIAHGYQAGFDNQGIFTGE	[232,236]	HEIAH	229141796
ZP_03237588.1	6e-92	342	NA	5.6e-09	29.7	ZP_03237588.1	301	3.8e-87	271.3	yes		Bacillus cereus H3081.97	wall-associated protein	HEVGHLHQQEPWKWSKVRE	[281,285]	HEVGH	206976683
YP_002532570.1	9e-92	341	NA	5.6e-09	29.7	YP_002532570.1	301	3.8e-87	271.3	yes		Bacillus cereus Q1	Wall-associated protein precursor	HEIAHGYQAGFDNQGIFTGE	[264,268]	HEIAH	222098512
ZP_04242042.1	2e-90	337	NA	5.2e-09	29.8	ZP_04242042.1	301	6.4e-87	271.2	yes	1	Bacillus cereus Rock1-15	hypothetical protein bcere0018_47450	HEIAHGYQAGFDNQGIFTGE	[252,256]	HEIAH	229112505
ZP_04214770.1	9e-92	341	NA	9.8e-09	28.9	ZP_04214770.1	300	1.1e-86	271.1	yes	1	Bacillus cereus Rock4-2	hypothetical protein bcere0023_49240	HEAGHLRQQSPWKFYNMTEVQNNIYSLSVE	[296,300]	HEAGH	229082307
YP_002752424.1	1e-91	340	NA	7.9e-08	25.9	YP_002752424.1	297	7.9e-86	271.1	yes		Bacillus cereus 03BB102	wall-associated protein	HEIAHGYQAGFDNQGIFTGE	[275,279]	HEIAH	225867046
ZP_03114768.1	1e-91	340	NA	7.9e-08	25.9	ZP_03114768.1	297	7.9e-86	271.1	yes		Bacillus cereus 03BB108	wall-associated protein	HEAGHARQQHPWTWNDLRGMGE	[276,280]	HEAGH	196047559
ZP_04314451.1	2e-91	340	NA	7.8e-08	25.9	ZP_04314451.1	297	7.8e-86	271.1	yes		Bacillus cereus BGSC 6E1	hypothetical protein bcere0004_48420	HEAGHLRQQSPWKFYNMTEVQNNIYSLSVE	[276,280]	HEAGH	229187307
YP_897294.1	1e-91	340	NA	7.9e-08	25.9	YP_897294.1	297	7.9e-86	271.1	yes		Bacillus thuringiensis str. Al Hakam	wall-associated protein	HEAGHKRQQQPWTWDDRRGTWE	[299,303]	HEAGH	118480143
ZP_00238015.1	5e-87	325	NA	5.9e-11	36.2	ZP_00238015.1	307	6.7e-89	270.8	yes		Bacillus cereus G9241	reticulocyte binding protein	HEVGHQHQQDTWLWDGLGE	[281,285]	HEVGH	47567302
ZP_04081237.1	7e-87	325	NA	2.2e-10	34.3	ZP_04081237.1	305	3.9e-88	270.7	yes	1	Bacillus thuringiensis serovar pulsiensis BGSC 4CC1	hypothetical protein bthur0012_49000	HEIAHGYQAGFDNQGIFTGE	[264,268]	HEIAH	228917696
ZP_04087070.1	2e-91	340	NA	4.4e-10	33.3	ZP_04087070.1	304	6.6e-88	270.7	yes	1	Bacillus thuringiensis serovar huazhongensis BGSC 4BD1	hypothetical protein bthur0011_47670	HEIAHGYQAGFDNQGIFTGE	[266,270]	HEIAH	228923792
ZP_04319929.1	2e-80	303	NA	3.9e-10	33.5	ZP_04319929.1	304	5.9e-88	270.5	yes	1	Bacillus cereus ATCC 10876	S-layer domain protein	HEVGHIHQQVPWLSEGMGE	[290,294]	HEVGH	229192972
NP_834723.1	1e-85	321	NA	6.3e-09	29.5	NP_834723.1	300	1.2e-86	270.5	yes	1	Bacillus cereus ATCC 14579	wall-associated protein precursor	HEVGHLHQQEPWKWSKVRE	[291,295]	HEVGH	30023092
ZP_04117334.1	6e-91	338	NA	6.4e-09	29.5	ZP_04117334.1	300	1.1e-86	270.5	yes	1	Bacillus thuringiensis serovar kurstaki str. T03a001	hypothetical protein bthur0006_46840	HEVGHLHQQAPWFWSGVGE	[291,295]	HEVGH	228955326
YP_002448623.1	1e-92	344	NA	5.4e-10	33	YP_002448623.1	303	8.2e-88	270	yes		Bacillus cereus G9842	wall-associated protein	HEAGHLRQQSPWKFYNMTEVQNNIYSLSVE	[296,300]	HEAGH	218900212
ZP_05282640.1	2e-62	244	NA	NA	0	ZP_05282640.1	270	1.2e-77	270	yes		Bacteroides fragilis 3_1_12	putative lipoprotein	HEIGHCNQTRPGLKWLGTTEVTNNIMSE	[647,651]	HEIGH
ZP_04308684.1	5e-91	339	NA	3.8e-09	30.2	ZP_04308684.1	300	1.1e-86	269.8	yes	1	Bacillus cereus 172560W	hypothetical protein bcere0005_46970	HEVGHQHQQDTWLWDGLGE	[281,285]	HEVGH	229181355
ZP_04206946.1	2e-80	303	NA	4.1e-10	33.4	ZP_04206946.1	303	8.6e-88	269.6	yes	1	Bacillus cereus F65185	S-layer domain protein	HEVGHQHQQDTWLWDGLGE	[281,285]	HEVGH	229073860
ZP_04188665.1	3e-92	342	NA	4e-07	23.5	ZP_04188665.1	293	1.2e-84	269.5	yes	1	Bacillus cereus AH1271	hypothetical protein bcere0028_47380	HEIAHGYQAGFDNQGIFTGE	[275,279]	HEIAH	229032704
ZP_04781251.1	9e-52	208	NA	NA	0	ZP_04781251.1	269	2.8e-77	269	yes		Sphingobacterium spiritivorum ATCC 33861	conserved hypothetical protein	HEIGHCNQTRPGLKWLGTTEVTNNIMSE	[654,658]	HEIGH
ZP_02925937.1	2e-86	324	NA	NA	0	ZP_02925937.1	269	2.8e-77	269	yes		Verrucomicrobium spinosum DSM 4136	hypothetical protein VspiD_04825	HEIGHIHQAAINWPGSTE	[573,577]	HEIGH
ZP_04117796.1	1e-79	300	NA	4.8e-10	33.2	ZP_04117796.1	302	2.2e-87	268.8	yes	1	Bacillus thuringiensis serovar kurstaki str. T03a001	S-layer domain protein	HEVGHQHQQDTWLWDGLGE	[272,276]	HEVGH	228955817
ZP_03969516.1	2e-51	207	NA	NA	0	ZP_03969516.1	268	5.9e-77	268	yes		Sphingobacterium spiritivorum ATCC 33300	conserved hypothetical protein	HEIGHVMQMSPQLTWGGMTE	[326,330]	HEIGH
ZP_00738692.1	2e-79	300	0.029	2.2e-07	24.4	ZP_00738692.1	292	2.7e-84	267.6	yes		Bacillus thuringiensis serovar israelensis ATCC 35	Wall-associated protein precursor	HEIAHGYQAGFDNQGIFTGE	[264,268]	HEIAH	75758573
ZP_04111485.1	2e-79	300	NA	2.8e-09	30.7	ZP_04111485.1	298	4.1e-86	267.3	yes	1	Bacillus thuringiensis serovar monterrey BGSC 4AJ1	S-layer domain protein	HEVGHLHQQEPWKWSKVRE	[291,295]	HEVGH	228949218
ZP_04112386.1	1e-80	304	NA	7.5e-08	25.9	ZP_04112386.1	293	1.4e-84	267.1	yes	1	Bacillus thuringiensis serovar monterrey BGSC 4AJ1	S-layer domain protein	HEVGHIHQQVPWLSEGMGE	[290,294]	HEVGH	228950208
ZP_01959885.1	3e-60	236	NA	NA	0	ZP_01959885.1	267	1.2e-76	267	yes		Bacteroides caccae ATCC 43185	hypothetical protein BACCAC_01495
ZP_04298280.1	2e-79	300	NA	3.7e-09	30.2	ZP_04298280.1	297	7.4e-86	266.8	yes		Bacillus cereus AH621	S-layer domain protein	HEVGHLHQQEPWKWSKVRE	[288,292]	HEVGH	229170635
ZP_04205749.1	1e-90	337	NA	8.7e-09	29	ZP_04205749.1	294	5.5e-85	265	yes	1	Bacillus cereus F65185	hypothetical protein bcere0025_47080	HEIAHGYQAGFDNQGIFTGE	[275,279]	HEIAH	229072547
ZP_03106796.1	1e-89	334	NA	7.5e-09	29.2	ZP_03106796.1	294	6e-85	264.8	yes	1	Bacillus cereus NVH0597-99	wall-associated protein	HEAGHARQQYPWTWNDLRGMGE	[276,280]	HEAGH	196039491
ZP_04291969.1	2e-83	313	NA	3e-08	27.2	ZP_04291969.1	292	3.3e-84	264.8	yes		Bacillus cereus R309803	hypothetical protein bcere0009_47940	HEAGHLRQQSPWKFYNMTEVQNNIYSLSVE	[296,300]	HEAGH	229164032
ZP_05418596.1	6e-60	235	NA	NA	0	ZP_05418596.1	264	8.2e-76	264	yes		Vibrio cholera CIRS 101	accessory colonization factor AcfD precursor	HEIGHVHQAAINWASSTE	[574,578]	HEIGH
ZP_01675490.1	6e-60	235	NA	NA	0	ZP_01675490.1	264	8.2e-76	264	yes		Vibrio cholerae 2740-80	lipoprotein, putative	HEIGHCNQTRPGLKWLGTTEVTNNIMSE	[654,658]	HEIGH
ZP_01974705.1	6e-60	235	NA	NA	0	ZP_01974705.1	264	8.2e-76	264	yes		Vibrio cholerae B33	lipoprotein, putative	HEIGHCNQTRPGLKWLGTTEVTNNIMSE	[654,658]	HEIGH
ZP_04400263.1	6e-60	235	NA	NA	0	ZP_04400263.1	264	8.2e-76	264	yes		Vibrio cholerae B33	accessory colonization factor AcfD precursor
ZP_04395055.1	6e-60	235	NA	NA	0	ZP_04395055.1	264	8.2e-76	264	yes		Vibrio cholerae BX 330286	accessory colonization factor AcfD precursor
ZP_06030335.1	6e-60	235	NA	NA	0	ZP_06030335.1	264	8.2e-76	264	yes		Vibrio cholerae INDRE 91/1	accessory colonization factor AcfD precursor	HEIGHCNQTRPGVLWGGNTEVTNNIMSE	[659,663]	HEIGH
YP_002809573.1	6e-60	235	NA	NA	0	YP_002809573.1	264	8.2e-76	264	yes		Vibrio cholerae M66-2	putative lipoprotein	HEIGHVHQAAINWASSTE	[574,578]	HEIGH
YP_002879212.1	6e-60	235	NA	NA	0	YP_002879212.1	264	8.2e-76	264	yes		Vibrio cholerae MJ-1236	accessory colonization factor AcfD precursor	HELGHMHQGAINWPSTTE	[689,693]	HELGH
ZP_05237331.1	6e-60	235	NA	NA	0	ZP_05237331.1	264	8.2e-76	264	yes		Vibrio cholerae MO10	accessory colonization factor AcfD	HEIGHVHQLAIDWMGSTE	[674,678]	HEIGH
ZP_01970715.1	6e-60	235	NA	NA	0	ZP_01970715.1	264	8.2e-76	264	yes		Vibrio cholerae NCTC 8457	lipoprotein, putative
NP_230493.1	6e-60	235	NA	NA	0	NP_230493.1	264	8.2e-76	264	yes		Vibrio cholerae O1 biovar El Tor str. N16961	hypothetical protein VC0845	HELGHNQQREQWEFPPHTTEATCNLWSVYVHE	[756,760]	HELGH
YP_001216326.1	2e-59	233	NA	NA	0	YP_001216326.1	264	7.6e-76	264	yes		Vibrio cholerae O395	putative lipoprotein	HELGHMHQGAINWPSTTE	[689,693]	HELGH
ZP_04407349.1	6e-60	235	NA	NA	0	ZP_04407349.1	264	8.2e-76	264	yes		Vibrio cholerae RC9	accessory colonization factor AcfD precursor	HELGHHHQQEPVNPGDVVEVTVNIFSLAVQREFE	[299,303]	HELGH
ZP_01679355.1	6e-60	235	NA	NA	0	ZP_01679355.1	264	8.2e-76	264	yes		Vibrio cholerae V52	lipoprotein, putative
YP_086361.1	2e-85	320	NA	4.9e-12	39.8	YP_086361.1	303	1.6e-87	263.2	yes	1	Bacillus cereus E33L	wall-associated protein	HEVGHLHQQEPWKWSKVRE	[234,238]	HEVGH	52140468
ZP_04200907.1	7e-81	305	1e-05	1.4e-07	25.1	ZP_04200907.1	288	5.6e-83	262.9	yes		Bacillus cereus AH603	S-layer domain protein	HEAGHLRQQSPWKFYNMTEVQNNIYSLSVE	[296,300]	HEAGH	229065680
ZP_01949281.1	2e-59	233	NA	NA	0	ZP_01949281.1	262	3e-75	262	yes		Vibrio cholerae 1587	accessory colonization factor AcfD	HELGHNMQRKWWTFEGTGE	[539,543]	HELGH
ZP_01981213.1	2e-59	233	NA	NA	0	ZP_01981213.1	262	3e-75	262	yes		Vibrio cholerae 623-39	AcfD
ZP_04960229.1	2e-59	234	NA	NA	0	ZP_04960229.1	262	4.1e-75	262	yes		Vibrio cholerae AM-19226	Large exoproteins involved in heme utilization or adhesion
ZP_04918555.1	2e-59	233	NA	NA	0	ZP_04918555.1	262	4.1e-75	262	yes		Vibrio cholerae V51	Large exoproteins involved in heme utilization or adhesion	HELGHNQQQEKWEFPPHTTEATCNLWSVYVHE	[757,761]	HELGH
ZP_04404639.1	1e-59	234	NA	NA	0	ZP_04404639.1	261	5.5e-75	261	yes		Vibrio cholerae TMA 21	accessory colonization factor AcfD precursor	HELGHRHQFWGIDFGELQE	[602,606]	HELGH
ZP_04618439.1	2e-70	270	NA	NA	0	ZP_04618439.1	261	8.9e-75	261	yes		Yersinia aldovae ATCC 35236	hypothetical protein yaldo0001_11520	HEIAHAYDFHFVRSGPVPLNE	[240,244]	HEIAH
ZP_04286723.1	2e-85	320	1.7e-06	6e-12	39.5	ZP_04286723.1	300	7.9e-87	260.5	yes		Bacillus cereus ATCC 4342	hypothetical protein bcere0010_48380	HEVGHLHQQEPWKWSKVRE	[291,295]	HEVGH	229158665
ZP_06051991.1	5e-60	235	NA	NA	0	ZP_06051991.1	260	1.1e-74	260	yes		Grimontia hollisae CIP 101886	accessory colonization factor AcfD precursor	HELGHNHQVGDWTFDGTVEVTCNLFSLYCME	[599,603]	HELGH
XP_001313628.1	9e-139	497	NA	NA	0	XP_001313628.1	260	1.4e-74	260	yes		Trichomonas vaginalis G3	Immuno-dominant variable surface antigen-like	HEVGHQMDISEREWGE	[562,566]	HEVGH
XP_001313082.1	4e-92	342	NA	NA	0	XP_001313082.1	260	1.8e-74	260	yes		Trichomonas vaginalis G3	Immuno-dominant variable surface antigen-like	HEIGHGYQDDFTRGE	[267,271]	HEIGH
ZP_05892431.1	1e-60	238	NA	NA	0	ZP_05892431.1	260	1.8e-74	260	yes		Vibrio parahaemolyticus AN-5034	hypothetical protein VparAN_19891	HEIGHGYQDDFTRGE	[267,271]	HEIGH
ZP_01988669.1	1e-59	234	NA	NA	0	ZP_01988669.1	260	1.6e-74	260	yes		Vibrio parahaemolyticus AQ3810	AcfD	HEIGHGYQDDFTRGE	[267,271]	HEIGH
ZP_05775657.1	1e-60	238	NA	NA	0	ZP_05775657.1	260	1.8e-74	260	yes		Vibrio parahaemolyticus K5030	hypothetical protein VparK_06627	HEIGHVIDEGNAIYGE	[1286,1290]	HEIGH
ZP_05903689.1	1e-60	238	NA	NA	0	ZP_05903689.1	260	1.8e-74	260	yes		Vibrio parahaemolyticus Peru-466	hypothetical protein VparP_03774	HEIGHVIDEGNAIYGE	[1300,1304]	HEIGH
NP_800886.1	1e-60	238	NA	NA	0	NP_800886.1	260	1.8e-74	260	yes		Vibrio parahaemolyticus RIMD 2210633	hypothetical protein VPA1376	HEIGHGYQDDFTRGE	[267,271]	HEIGH
YP_001007019.1	4e-71	272	NA	NA	0	YP_001007019.1	260	2e-74	260	yes		Yersinia enterocolitica subsp. enterocolitica 8081	hypothetical protein YE2830	HEIGHVTDIGKMTYSE	[145,149]	HEIGH
ZP_06039074.1	2e-61	240	NA	NA	0	ZP_06039074.1	259	2.9e-74	259	yes		Vibrio mimicus MB-451	accessory colonization factor AcfD precursor	HEIGHKADIGNRTYSE	[1245,1249]	HEIGH
ZP_06033510.1	6e-62	242	NA	NA	0	ZP_06033510.1	259	3.2e-74	259	yes		Vibrio mimicus VM223	accessory colonization factor AcfD precursor	HEMGHNFDTNNRTIVEVTNNMLPLHFE	[972,976]	HEMGH
ZP_03970216.1	1e-57	228	NA	NA	0	ZP_03970216.1	258	7.8e-74	258	yes		Sphingobacterium spiritivorum ATCC 33300	conserved hypothetical protein	HEFGHIFNTQYVVDGEVTNNLYAQE	[995,999]	HEFGH
ZP_04779511.1	3e-58	230	NA	NA	0	ZP_04779511.1	258	6.4e-74	258	yes		Sphingobacterium spiritivorum ATCC 33861	conserved hypothetical protein	HEFGHIFNTQYVVDGEVTNNLYAQE	[995,999]	HEFGH
XP_001582477.1	6e-125	451	NA	NA	0	XP_001582477.1	258	6.1e-74	258	yes		Trichomonas vaginalis G3	Immuno-dominant variable surface antigen-like	HELGHNFDTGGRTIVEVTNNMMPLFFE	[756,760]	HELGH
YP_001675698.1	4e-58	230	NA	0.0019	11.3	YP_001675698.1	269	1.9e-77	257.7	yes		Shewanella halifaxensis HAW-EB4	hypothetical protein Shal_3494	HEIGHCNQTRPGLKWLGTTEVTNNIMSE	[654,658]	HEIGH	167625404
YP_001878116.1	1e-80	304	NA	0.00039	13.6	YP_001878116.1	271	5.9e-78	257.4	yes		Akkermansia muciniphila ATCC BAA-835	hypothetical protein Amuc_1514				187736004
ZP_04413087.1	1e-60	238	NA	NA	0	ZP_04413087.1	257	1.6e-73	257	yes		Vibrio cholerae bv. albensis VL426	accessory colonization factor AcfD precursor	HELGHNFDTGGRTIVEVTNNMMPLFFE	[756,760]	HELGH
NP_759746.1	5e-60	236	NA	NA	0	NP_759746.1	257	1.3e-73	257	yes		Vibrio vulnificus CMCP6	hypothetical protein VV1_0767	HEFGHIFNTQYVVDGEVTNNLYAQE	[995,999]	HEFGH
XP_001583909.1	2e-127	459	NA	NA	0	XP_001583909.1	256	3.3e-73	256	yes		Trichomonas vaginalis G3	Immuno-dominant variable surface antigen-like	HELGHNFDTGGRTIVEVTNNMMPLFFE	[756,760]	HELGH
ZP_04617115.1	7e-72	275	NA	4.8e-05	16.6	ZP_04617115.1	272	3.5e-78	255.4	yes		Yersinia ruckeri ATCC 29473	hypothetical protein yruck0001_340	HEVGHVHQLQTYLSWGGLGE	[342,346]	HEVGH	238755783
ZP_01954520.1	8e-59	231	NA	0.0058	9.8	ZP_01954520.1	265	3.8e-76	255.2	yes		Vibrio cholerae MAK 757	accessory colonization factor AcfD	HEIGHCNQTRPGVLWGGNTEVTNNIMSE	[647,651]	HEIGH	153224613
XP_001521183.1	1e-76	291	NA	NA	0	XP_001521183.1	255	4.1e-73	255	yes		Ornithorhynchus anatinus	PREDICTED: similar to FLJ00264 protein	HEFGHIFNTKYVVDGEVTNNLYAQE	[227,231]	HEFGH
YP_001502491.1	1e-53	214	NA	NA	0	YP_001502491.1	254	1.2e-72	254	yes		Shewanella pealeana ATCC 700345	inner membrane lipoprotein	HEINHHYQKRYLNYSDEWGVGDEFSE	[330,334]	HEINH
XP_001330197.1	2e-109	400	NA	NA	0	XP_001330197.1	254	8.4e-73	254	yes		Trichomonas vaginalis G3	Immuno-dominant variable surface antigen-like		[287,291]	HEVGH
ZP_04916523.1	2e-60	237	NA	NA	0	ZP_04916523.1	253	1.8e-72	253	yes		Vibrio cholerae RC385	Large exoproteins involved in heme utilization or adhesion		[287,291]	HEVGH
ZP_06078833.1	1e-60	238	NA	NA	0	ZP_06078833.1	253	1.8e-72	253	yes		Vibrio sp. RC586	accessory colonization factor AcfD precursor	HEFGHIFNTQYVVDGEVTNNLYAQE	[995,999]	HEFGH
ZP_01960170.1	2e-45	188	NA	NA	0	ZP_01960170.1	252	4.3e-72	252	yes		Bacteroides caccae ATCC 43185	hypothetical protein BACCAC_01782	HEIGHNFDTNNRTIVEVTNNMLPLHFE	[972,976]	HEIGH
YP_003244709.1	3e-90	336	NA	5.6e-12	39.6	YP_003244709.1	290	1.2e-83	250.4	yes		Geobacillus sp. Y412MC10	hypothetical protein GYMC10_4682	HEAGHQRQQTPWTWDGLGE	[262,266]	HEAGH	261408468
ZP_01959767.1	3e-44	183	NA	NA	0	ZP_01959767.1	249	3.1e-71	249	yes		Bacteroides caccae ATCC 43185	hypothetical protein BACCAC_01376	HELGHNFDTGGRTIVEVTNNIMPLFFE	[534,538]	HELGH
ZP_04639817.1	1e-68	264	NA	NA	0	ZP_04639817.1	249	2.4e-71	249	yes		Yersinia mollaretii ATCC 43969	hypothetical protein ymoll0001_21340	HELGHNFDTGGRTIVEVTNNMMPLFFE	[756,760]	HELGH
ZP_04918705.1	9e-60	235	NA	0.0016	11.6	ZP_04918705.1	260	1.2e-74	248.4	yes		Vibrio cholerae V51	lipoprotein, putative	HEVGHQMDIMGRDWPE	[334,338]	HEVGH	254225091
ZP_05718328.1	4e-61	240	NA	0.003	10.7	ZP_05718328.1	259	2.6e-74	248.3	yes		Vibrio mimicus VM573	accessory colonization factor acfD	HEIGHEINEGAYAIAE	[1140,1144]	HEIGH	258623323
ZP_05715067.1	3e-59	233	NA	0.0017	11.5	ZP_05715067.1	259	2.9e-74	247.5	yes		Vibrio mimicus VM573	Accessory colonization factor AcfD	HELGHNFDTGGRTIVEVTNNMMPLFFE	[756,760]	HELGH	258620027
ZP_01959886.1	2e-53	213	NA	0.005	10	ZP_01959886.1	255	6.1e-73	245	yes		Bacteroides caccae ATCC 43185	hypothetical protein BACCAC_01496	HEFGHIFNTQYVVDGEVTNNLYAQE	[995,999]	HEFGH	153807218
ZP_03208622.1	7e-50	202	NA	4.6e-05	16.7	ZP_03208622.1	260	1.8e-74	243.3	yes		Bacteroides plebeius DSM 17135	hypothetical protein BACPLE_02278	HEIGHGYQNDFTRGE	[267,271]	HEIGH	198276091
ZP_01960247.1	2e-61	240	NA	NA	0	ZP_01960247.1	242	3.5e-69	242	yes		Bacteroides caccae ATCC 43185	hypothetical protein BACCAC_01859	HEELHRDDNSVNYDYDEKNCILGATE	[996,1000]	HEELH
XP_001310029.1	8e-116	421	NA	NA	0	XP_001310029.1	242	5.6e-69	242	yes		Trichomonas vaginalis G3	Immuno-dominant variable surface antigen-like	HEIGHRMDVSTRLYGE	[1213,1217]	HEIGH
YP_003041170.1	1e-60	238	NA	NA	0	YP_003041170.1	240	2e-68	240	yes		Photorhabdus asymbiotica	hypothetical protein PAU_02334	HEIGHNRQKPQWTFAGTEE	[777,781]	HEIGH
ZP_04846622.1	2e-59	233	NA	NA	0	ZP_04846622.1	239	3.1e-68	239	yes		Bacteroides sp. 1_1_6	conserved hypothetical protein	HELGHNQQRGVWEFPPHTTECTCNLWSLYVHE	[754,758]	HELGH
NP_811927.1	9e-59	231	NA	NA	0	NP_811927.1	239	3e-68	239	yes		Bacteroides thetaiotaomicron VPI-5482	hypothetical protein BT_3015	HEIGHNRQSSYWTFNGTEE	[805,809]	HEIGH
ZP_01960238.1	1e-61	241	NA	7.6e-05	16	ZP_01960238.1	246	2.4e-70	230	yes		Bacteroides caccae ATCC 43185	hypothetical protein BACCAC_01850	HELGHNFDTGGRTIVEVTNNMMPLFFE	[756,760]	HELGH	153807570
ZP_02327682.1	4e-74	283	NA	NA	0	ZP_02327682.1	229	3.1e-65	229	yes	1	Paenibacillus larvae subsp. larvae BRL-230010	S-layer domain protein	HEIGHNINQAQYAYSE	[1180,1184]	HEIGH
YP_001877245.1	4e-51	206	NA	NA	0	YP_001877245.1	229	3.5e-65	229	yes		Akkermansia muciniphila ATCC BAA-835	hypothetical protein Amuc_0627	HEMNHHMQGTYLRGGNWGIKEPGEE	[389,393]	HEMNH
ZP_04443744.1	8e-55	218	NA	NA	0	ZP_04443744.1	225	4.9e-64	225	yes		Listeria grayi DSM 20601	possible wall-associated protein precursor	HEMNHHMQGTYLKGGNWGISNPGEE	[388,392]	HEMNH
YP_204079.1	5e-43	179	NA	NA	0	YP_204079.1	223	3.3e-63	223	yes		Vibrio fischeri ES114	accessory colonization factor AcfD-like protein, inner membrane lipoprotein	HELGHNQQQHGWEFPPHTTEATCNLWSVYVHE	[757,761]	HELGH
YP_003154412.1	5e-54	216	NA	NA	0	YP_003154412.1	222	5.2e-63	222	yes		Brachybacterium faecium DSM 4810	hypothetical protein Bfae_09730
XP_001304497.1	4e-102	376	NA	NA	0	XP_001304497.1	215	7.1e-61	215	yes		Trichomonas vaginalis G3	Immuno-dominant variable surface antigen-like	HEVGHNAAETPLTVPGATE	[1298,1302]	HEVGH
XP_002377568.1	1e-58	231	NA	7.7e-06	19.3	XP_002377568.1	233	2.4e-66	213.7	yes	1	Aspergillus flavus NRRL3357	cell wall associated protein, putative	HELGHNQQRKVWEFPPHTTECTCNLWSVYVHE	[754,758]	HELGH	238492663
ZP_04781290.1	2e-53	213	NA	NA	0	ZP_04781290.1	213	2.1e-60	213	yes		Sphingobacterium spiritivorum ATCC 33861	possible wall-associated protein	HEVGHNAAETPLTVPGATE	[1305,1309]	HEVGH
XP_001825930.1	2e-57	227	NA	9.2e-06	19	XP_001825930.1	230	2e-65	211	yes	1	Aspergillus oryzae RIB40	hypothetical protein	HELGHNQQRKVWEFPPHTTECTCNLWSVYVHE	[750,754]	HELGH	169782936
ZP_03969571.1	3e-52	210	NA	NA	0	ZP_03969571.1	211	1e-59	211	yes		Sphingobacterium spiritivorum ATCC 33300	possible wall-associated protein	HEVGHNAAETPLTVPGATE	[1288,1292]	HEVGH
YP_003122217.1	9e-75	285	NA	3.9e-07	23.6	YP_003122217.1	230	1.7e-65	206.4	yes		Chitinophaga pinensis DSM 2588	hypothetical protein Cpin_2532				256421564
NP_795062.1	1e-46	191	NA	NA	0	NP_795062.1	203	4e-57	203	yes		Pseudomonas syringae pv. tomato str. DC3000	hypothetical protein PSPTO_5331	HEVGHNAAETPLTVPGATE	[1310,1314]	HEVGH
ZP_03399297.1	1e-46	191	NA	NA	0	ZP_03399297.1	203	4e-57	203	yes		Pseudomonas syringae pv. tomato T1	hypothetical protein PSPTOT1_2511	HEVGHNAAETPLTVPGATE	[1302,1306]	HEVGH
ZP_03642641.1	4e-46	189	NA	NA	0	ZP_03642641.1	201	9.7e-57	201	yes		Bacteroides coprophilus DSM 18228	hypothetical protein BACCOPRO_00998	HEVGHNAAETPLNVPGATE	[1304,1308]	HEVGH
ZP_04589884.1	2e-62	244	NA	NA	0	ZP_04589884.1	200	2.2e-56	200	yes		Pseudomonas syringae pv. oryzae str. 1_6	hypothetical protein Psyrpo1_21516	HEVGHNAAETPLNVPGATE	[1301,1305]	HEVGH
YP_237954.1	3e-50	203	NA	NA	0	YP_237954.1	200	3.5e-56	200	yes		Pseudomonas syringae pv. syringae B728a	hypothetical protein Psyr_4889	HEVGHNAAETPLTVPGATE	[1305,1309]	HEVGH
NP_794325.2	4e-57	226	NA	NA	0	NP_794325.2	198	9.1e-56	198	yes		Pseudomonas syringae pv. tomato str. DC3000	hypothetical protein PSPTO_4574	HEVGHNAAETPLTVPGATE	[1303,1307]	HEVGH
ZP_05722171.1	4e-47	193	NA	0.00022	14.5	ZP_05722171.1	212	8.2e-60	197.5	yes		Vibrio mimicus VM603	conserved hypothetical protein	HEAGHNAAETPLTVPGATE	[1305,1309]	HEAGH	258627388
ZP_01959638.1	1e-57	228	NA	NA	0	ZP_01959638.1	187	3.2e-52	187	yes		Bacteroides caccae ATCC 43185	hypothetical protein BACCAC_01246	HEVGHNAAETPLTVPGATE	[1303,1307]	HEVGH
ZP_04778523.1	6e-50	202	NA	NA	0	ZP_04778523.1	187	3.2e-52	187	yes		Sphingobacterium spiritivorum ATCC 33861	conserved hypothetical protein	HEVGHNAAETPLTVPGATE	[1260,1264]	HEVGH
ZP_03968927.1	1e-49	201	NA	NA	0	ZP_03968927.1	185	1.3e-51	185	yes		Sphingobacterium spiritivorum ATCC 33300	conserved hypothetical protein	HEVGHNAAETPLTVPGATE	[1261,1265]	HEVGH
XP_002613810.1	2e-76	290	NA	NA	0	XP_002613810.1	173	4.6e-48	173	yes		Branchiostoma floridae	hypothetical protein BRAFLDRAFT_85351	HEVGHNAAETPLTVPGATE	[1289,1293]	HEVGH
YP_237316.1	3e-59	233	NA	NA	0	YP_237316.1	169	5.3e-47	169	yes		Pseudomonas syringae pv. syringae B728a	hypothetical protein Psyr_4248	HEVGHNAAETPLNVPGATE	[1310,1314]	HEVGH
ZP_01960954.1	5e-60	236	NA	NA	0	ZP_01960954.1	149	6.8e-41	149	yes		Bacteroides caccae ATCC 43185	hypothetical protein BACCAC_02574	HEVGHNAAETPLNVPGATE	[1304,1308]	HEVGH
XP_002197366.1	5e-42	176	NA	NA	0	XP_002197366.1	148	1.8e-40	148	yes		Taeniopygia guttata	PREDICTED: similar to Protein FAM115C, partial	HEVGHNAAETPLTVPGATE	[1287,1291]	HEVGH
ZP_01961832.1	7e-60	235	NA	NA	0	ZP_01961832.1	147	4.4e-40	147	yes		Bacteroides caccae ATCC 43185	hypothetical protein BACCAC_03474	HEVGHNAAETPLTVPGATE	[1308,1312]	HEVGH
ZP_03207951.1	6e-63	245	NA	NA	0	ZP_03207951.1	142	1.6e-38	142	yes		Bacteroides plebeius DSM 17135	hypothetical protein BACPLE_01583	HEVGHNAAETPLTVPGATE	[1305,1309]	HEVGH
ZP_01961267.1	5e-64	249	NA	NA	0	ZP_01961267.1	140	6.7e-38	140	yes		Bacteroides caccae ATCC 43185	hypothetical protein BACCAC_02897	HEVGHNAAETPLNVPGATE	[1308,1312]	HEVGH
ZP_04847386.1	2e-64	250	NA	NA	0	ZP_04847386.1	134	2.8e-36	134	yes		Bacteroides sp. 1_1_6	conserved hypothetical protein	HEVGHNAAETPLNVPGATE	[1310,1314]	HEVGH
			NA	NA	0	NP_813155.1	134	2.8e-36	134	yes		Bacteroides thetaiotaomicron VPI-5482	hypothetical protein BT_4244	HEVGHNAAETPLTVPGATE	[1305,1309]	HEVGH
YP_001298266.1	3e-59	233	NA	NA	0	YP_001298266.1	134	4e-36	134	yes		Bacteroides vulgatus ATCC 8482	hypothetical protein BVU_0949	HEVGHNAAETPLTVPGATE	[1302,1306]	HEVGH
XP_001750305.1	2e-37	161	NA	NA	0	XP_001750305.1	133	4.9e-36	133	yes		Monosiga brevicollis MX1	hypothetical protein	HEVGHNAAETPLTVPGATE	[1303,1307]	HEVGH
ZP_01959768.1	3e-32	143	NA	NA	0	ZP_01959768.1	132	9.6e-36	132	yes		Bacteroides caccae ATCC 43185	hypothetical protein BACCAC_01377	HEVGHNAAETPLTVPGATE	[1303,1307]	HEVGH
XP_002139263.1	3e-51	207	NA	NA	0	XP_002139263.1	131	3.5e-35	131	yes		Cryptosporidium muris RN66	hypothetical protein	HEVGHNAAETPLNVPGATE	[1304,1308]	HEVGH
ZP_04834099.1	3e-41	173	NA	NA	0	ZP_04834099.1	131	3.1e-35	131	yes		Prevotella melaninogenica ATCC 25845	conserved hypothetical protein	HEVGHNAAETPLTVPGATE	[1304,1308]	HEVGH
ZP_01958589.1	1e-28	131	NA	NA	0	ZP_01958589.1	130	5.2e-35	130	yes		Bacteroides caccae ATCC 43185	hypothetical protein BACCAC_00161	HEVGHNAAETPLTVPGATE	[1307,1311]	HEVGH
YP_001877521.1	1e-44	184	NA	0.00083	12.6	YP_001877521.1	142	1.2e-38	129.4	yes		Akkermansia muciniphila ATCC BAA-835	hypothetical protein Amuc_0908	HEVGHNAAETPLTVPGATE	[1308,1312]	HEVGH	187735409
ZP_01960228.1	1e-62	245	NA	NA	0	ZP_01960228.1	127	4.4e-34	127	yes		Bacteroides caccae ATCC 43185	hypothetical protein BACCAC_01840	HEVGHNAAETPLTVPGATE	[1305,1309]	HEVGH
ZP_01960229.1	6e-63	245	NA	NA	0	ZP_01960229.1	126	8.5e-34	126	yes		Bacteroides caccae ATCC 43185	hypothetical protein BACCAC_01841	HEVGHNAAETPLNVPGATE	[1304,1308]	HEVGH
ZP_02954286.1	1e-55	221	NA	NA	0	ZP_02954286.1	124	2.9e-33	124	yes	1	Clostridium perfringens D str. JGS1721	putative antigenic protein NP1	HEIGHNINQGKYAIAE	[1111,1115]	HEIGH
ZP_01961967.1	8e-51	205	NA	NA	0	ZP_01961967.1	123	8e-33	123	yes		Bacteroides caccae ATCC 43185	hypothetical protein BACCAC_03612	HETGHEYQQGAWNWNVTGEITVNIYSLYVQE	[652,656]	HETGH
XP_001330484.1	8e-41	172	NA	NA	0	XP_001330484.1	121	2.8e-32	121	yes		Trichomonas vaginalis G3	hypothetical protein	HELGHEYQQRTWTWSDVGEVTVNLFSLYTQE	[677,681]	HELGH
XP_001579914.1	3e-68	263	NA	NA	0	XP_001579914.1	119	9.6e-32	119	yes		Trichomonas vaginalis G3	Immuno-dominant variable surface antigen-like	HELGHNLQTGKLNVHYVPAGSENTWSAYQNRAGE	[734,738]	HELGH
XP_001319600.1	2e-76	290	NA	NA	0	XP_001319600.1	117	3.7e-31	117	yes		Trichomonas vaginalis G3	Immuno-dominant variable surface antigen-like	HEVGHNAAEAPFTVEGATE	[1243,1247]	HEVGH
XP_001299523.1	8e-51	205	NA	NA	0	XP_001299523.1	114	2.9e-30	114	yes		Trichomonas vaginalis G3	Immuno-dominant variable surface antigen-like		[811,815]	HELGH
ZP_04105302.1	2e-35	154	NA	NA	0	ZP_04105302.1	113	1.1e-29	113	yes	1	Bacillus thuringiensis serovar berliner ATCC 10792	Fibronectin type III domain protein	HEIGHAYDLVFTQGTNLHE	[247,251]	HEIGH
XP_001388270.1	3e-32	143	NA	NA	0	XP_001388270.1	112	1.6e-29	112	yes		Cryptosporidium parvum Iowa II	hypothetical protein	HELGHAYDFVFTVNTRLIE	[244,248]	HELGH
ZP_04101632.1	8e-36	155	NA	NA	0	ZP_04101632.1	111	2.4e-29	111	yes	1	Bacillus thuringiensis serovar berliner ATCC 10792	Fibronectin type III domain protein	HELGHNQQRHGWEFPPHTTEATCNLWSVYVHE	[757,761]	HELGH
XP_002346094.1	3e-34	150	NA	NA	0	XP_002346094.1	110	5.9e-29	110	yes		Homo sapiens	PREDICTED: similar to FAM115A protein	HELGHNQQRHGWEFPPHTTEATCNLWSVYVHE	[757,761]	HELGH
ZP_04780830.1	3e-44	183	NA	4.1e-05	16.9	ZP_04780830.1	126	1e-33	109.1	yes		Sphingobacterium spiritivorum ATCC 33861	possible wall-associated protein	HEVGHNAAETPLTVPGATE	[1260,1264]	HEVGH	241893534
ZP_05415629.1	2e-33	147	NA	NA	0	ZP_05415629.1	109	1e-28	109	yes		Bacteroides finegoldii DSM 17565	conserved hypothetical protein	HELGHNQQRHGWEFPPHTTEATCNLWSVYVHE	[476,480]	HELGH
ZP_03966994.1	3e-44	183	NA	4.1e-05	16.9	ZP_03966994.1	124	4.4e-33	107.1	yes		Sphingobacterium spiritivorum ATCC 33300	possible wall-associated protein	HEVGHAYDFNFVTNVPVLSE	[252,256]	HEVGH	227536945
NP_757708.1	4e-47	193	NA	NA	0	NP_757708.1	107	4e-28	107	yes		Mycoplasma penetrans HF-2	integral membrane protein
ZP_05757374.1	2e-31	141	NA	NA	0	ZP_05757374.1	106	1.4e-27	106	yes		Bacteroides sp. D2	hypothetical protein BacD2_03774
XP_001737701.1	3e-69	266	NA	NA	0	XP_001737701.1	98	2.5e-25	98	yes		Entamoeba dispar SAW760	antigenic protein NP1	HEIGHGYEIPSDGLWIRDSFNNIFGTLYQLEYE	[337,341]	HEIGH
XP_654508.1	4e-69	266	NA	NA	0	XP_654508.1	97	5.9e-25	97	yes		Entamoeba histolytica HM-1:IMSS	immuno-dominant variable surface antigen	HEIGHGYEIPSDGLWIRDSFNNIFGTLYQLEYE	[479,483]	HEIGH
ZP_04845085.1	2e-34	151	NA	NA	0	ZP_04845085.1	95	2.6e-24	95	yes		Bacteroides sp. 1_1_6	coagulation factor 5/8 type	HEIGHGYEIPSDGLWIRDSFNNIFGTLYQLEYE	[479,483]	HEIGH
NP_809190.1	2e-34	151	NA	NA	0	NP_809190.1	95	2.6e-24	95	yes		Bacteroides thetaiotaomicron VPI-5482	hypothetical protein BT_0277	HESGHTYQNKMYQWRNMTE	[307,311]	HESGH
ZP_04136244.1	3e-31	140	NA	NA	0	ZP_04136244.1	92	1.5e-23	92	yes	1	Bacillus thuringiensis serovar thuringiensis str. T01001	Fibronectin type III domain protein	HEIGHAYDFQFVSNTPALNE	[242,246]	HEIGH
YP_698600.1	2e-49	201	NA	NA	0	YP_698600.1	92	2.4e-23	92	yes		Clostridium perfringens SM101	leucine rich repeat domain-containing protein	HEIGHGHEFAFVGTAPPLIE	[244,248]	HEIGH
XP_001322037.1	2e-41	174	NA	NA	0	XP_001322037.1	90	1.1e-22	90	yes		Trichomonas vaginalis G3	hypothetical protein	HELGHNQQRHGWEFPPHTTEATCNLWSVYVHE	[757,761]	HELGH
ZP_02211509.1	3e-49	200	NA	NA	0	ZP_02211509.1	89	1.5e-22	89	yes		Clostridium bartlettii DSM 16795	hypothetical protein CLOBAR_01122	HEIAHSFDAYFTWNYAHADIRE	[228,232]	HEIAH
ZP_02211508.1	2e-46	190	NA	NA	0	ZP_02211508.1	89	2.2e-22	89	yes		Clostridium bartlettii DSM 16795	hypothetical protein CLOBAR_01121	HEELHRDDNSVNYDYDEKNCILGATE	[996,1000]	HEELH
XP_001325313.1	3e-27	127	NA	NA	0	XP_001325313.1	88	3.6e-22	88	yes		Trichomonas vaginalis G3	hypothetical protein	HEFGHNLQESVWTFEGAGE	[965,969]	HEFGH
YP_695932.1	8e-49	198	NA	NA	0	YP_695932.1	87	9.3e-22	87	yes		Clostridium perfringens ATCC 13124	F5/8 type C domain-containing protein	HELGHNQQCRGWEFPPHTTEATCNLWSVYVHE	[758,762]	HELGH
NP_562197.1	1e-48	198	NA	NA	0	NP_562197.1	87	9.3e-22	87	yes		Clostridium perfringens str. 13	hypothetical protein CPE1281	HELGHNHQKSGWTFPPHTTEALCNLWTIYVHE	[748,752]	HELGH
ZP_02951972.1	1e-48	198	NA	NA	0	ZP_02951972.1	86	1.2e-21	86	yes	1	Clostridium perfringens D str. JGS1721	F5/8 type C domain protein
ZP_02638647.1	1e-47	194	NA	NA	0	ZP_02638647.1	86	1.4e-21	86	yes		Clostridium perfringens CPE str. F4969	F5/8 type C domain protein	HEYNHHFQVNPSNVSWGFIRNDQNE	[535,539]	HEYNH
ZP_02642699.1	3e-48	197	NA	NA	0	ZP_02642699.1	86	1.4e-21	86	yes		Clostridium perfringens NCTC 8239	F5/8 type C domain protein
ZP_02635227.1	2e-48	197	NA	NA	0	ZP_02635227.1	85	2.1e-21	85	yes		Clostridium perfringens B str. ATCC 3626	F5/8 type C domain protein	HENNHQNQGSWGYTGSGE	[73,77]	HENNH
XP_001326787.1	1e-31	141	NA	NA	0	XP_001326787.1	85	3.7e-21	85	yes		Trichomonas vaginalis G3	hypothetical protein	HELGHNQQRSGWELPPHTTEATCNLWSIYVNE	[752,756]	HELGH
ZP_04281429.1	4e-25	120	NA	NA	0	ZP_04281429.1	82	2.5e-20	82	yes		Bacillus cereus m1550	hypothetical protein bcere0011_47810	HELGHNQQRSGWELPPHTTEATCNLWSVYVSE	[819,823]	HELGH
YP_001573177.1	2e-33	147	NA	NA	0	YP_001573177.1	81	6e-20	81	yes		Salmonella enterica subsp. arizonae serovar 62:z4,z23:-- str. RSK2980	hypothetical protein SARI_04252	HELGHNQQRSNWEFPPHTSEATCNLWSVYVSE	[373,377]	HELGH
ZP_02641714.1	1e-42	178	NA	NA	0	ZP_02641714.1	78	5.2e-19	78	yes		Clostridium perfringens NCTC 8239	discoidin domain protein	HEIAHGYQAAFDNKGMYTGE	[92,96]	HEIAH
YP_695519.1	6e-42	176	NA	NA	0	YP_695519.1	77	9.7e-19	77	yes		Clostridium perfringens ATCC 13124	discoidin domain-containing protein	HEIAHGYQAAFDNKGMYTGE	[768,772]	HEIAH
XP_001310435.1	1e-25	122	NA	NA	0	XP_001310435.1	77	7.2e-19	77	yes		Trichomonas vaginalis G3	hypothetical protein	HEVGHTHQMNILNWSGLGE	[283,287]	HEVGH
XP_001297964.1	9e-25	119	NA	NA	0	XP_001297964.1	76	2.1e-18	76	yes		Trichomonas vaginalis G3	hypothetical protein
ZP_02953684.1	3e-57	226	NA	NA	0	ZP_02953684.1	74	6.9e-18	74	yes	1	Clostridium perfringens D str. JGS1721	discoidin domain protein
ZP_02631053.1	2e-58	230	NA	NA	0	ZP_02631053.1	74	5.8e-18	74	yes		Clostridium perfringens E str. JGS1987	discoidin domain protein	HESGHQRQQSPYTWSGGTGMTEVTVNLYSLAVQE	[234,238]	HESGH
ZP_02637411.1	4e-57	226	NA	NA	0	ZP_02637411.1	73	1.5e-17	73	yes		Clostridium perfringens B str. ATCC 3626	discoidin domain protein	HELGHNLQVNRLKVYGGRSGE	[696,700]	HELGH
ZP_02865871.1	4e-54	216	NA	NA	0	ZP_02865871.1	73	1.1e-17	73	yes		Clostridium perfringens C str. JGS1495	ABC transporter, permease protein	HELGHNLQVNRLKVYGGRSGE	[696,700]	HELGH
ZP_02637953.1	4e-57	226	NA	NA	0	ZP_02637953.1	73	1.5e-17	73	yes		Clostridium perfringens CPE str. F4969	discoidin domain protein	HELGHNLQVNRLKVYGGRSGE	[696,700]	HELGH
XP_001319139.1	4e-26	123	NA	NA	0	XP_001319139.1	73	1e-17	73	yes		Trichomonas vaginalis G3	hypothetical protein	HEFGHNHQQLFNTAGMTE	[675,679]	HEFGH
ZP_05129649.1	6e-42	176	NA	NA	0	ZP_05129649.1	72	2.6e-17	72	yes		Clostridium sp. 7_2_43FAA	leucine rich repeat domain-containing protein	HELGHNLQVNRLKVYGGRSGE	[696,700]	HELGH
XP_002610768.1	7e-31	139	NA	NA	0	XP_002610768.1	71	6.1e-17	71	yes		Branchiostoma floridae	hypothetical protein BRAFLDRAFT_91560	HESGHQRQLSPMTWGTGTGMTEVTVNLYSMAAQE	[250,254]	HESGH
XP_001323206.1	4e-28	129	NA	NA	0	XP_001323206.1	71	5.5e-17	71	yes		Trichomonas vaginalis G3	hypothetical protein	HELGHNLQVNRLKVYGGRSGE	[696,700]	HELGH
NP_757816.1	4e-27	126	NA	NA	0	NP_757816.1	69	1.5e-16	69	yes		Mycoplasma penetrans HF-2	hypothetical protein MYPE4300	HESGHQRQLSPMNWEDMTEVTVNIYSLATQERME	[251,255]	HESGH
XP_001326227.1	8e-28	129	NA	NA	0	XP_001326227.1	69	2.2e-16	69	yes		Trichomonas vaginalis G3	hypothetical protein	HELGHNQQRSGWEFRPHTTEATCNLWSVYVHE	[812,816]	HELGH
ZP_02035877.1	1e-36	158	NA	NA	0	ZP_02035877.1	66	1.6e-15	66	yes		Bacteroides capillosus ATCC 29799	hypothetical protein BACCAP_01474	HEYGHNFQYGWGWPSFRDYIE	[278,282]	HEYGH
XP_001317727.1	2e-28	131	NA	NA	0	XP_001317727.1	66	2.1e-15	66	yes		Trichomonas vaginalis G3	hypothetical protein
ZP_04847358.1	2e-33	147	NA	NA	0	ZP_04847358.1	64	8.7e-15	64	yes		Bacteroides sp. 1_1_6	conserved hypothetical protein	HEVGHNSAEAPFNVDGATE	[1310,1314]	HEVGH
NP_813183.1	2e-33	147	NA	NA	0	NP_813183.1	64	7.8e-15	64	yes		Bacteroides thetaiotaomicron VPI-5482	hypothetical protein BT_4272	HEVGHNSAEAPFNVDGATE	[1310,1314]	HEVGH
YP_001346070.1	3e-40	170	NA	NA	0	YP_001346070.1	64	7.7e-15	64	yes		Pseudomonas aeruginosa PA7	hypothetical protein PSPA7_0675	HEVGHNSAEAPFNVDGATE	[768,772]	HEVGH
YP_001759442.1	1e-43	181	NA	NA	0	YP_001759442.1	64	8.7e-15	64	yes		Shewanella woodyi ATCC 51908	hypothetical protein Swoo_1054	HEVGHNLATAPFVVPGSTEVTNNILALYMQE	[1265,1269]	HEVGH
ZP_04930535.1	6e-39	166	NA	NA	0	ZP_04930535.1	63	1.3e-14	63	yes		Pseudomonas aeruginosa C3719	hypothetical protein PACG_03268	HEVGHNSAEAPFNVDGATE	[1233,1237]	HEVGH
YP_002438177.1	6e-39	166	NA	NA	0	YP_002438177.1	63	1.3e-14	63	yes		Pseudomonas aeruginosa LESB58	hypothetical protein PLES_05691	HEVGHNAAEAPFNVDGATE	[1317,1321]	HEVGH
ZP_01363476.1	2e-39	167	NA	NA	0	ZP_01363476.1	63	1.1e-14	63	yes		Pseudomonas aeruginosa PACS2	hypothetical protein PaerPA_01000570	HELGHNLQTGKLNVHYVPAGSENTWSAYQNRAGE	[663,667]	HELGH
NP_249263.1	6e-39	166	NA	NA	0	NP_249263.1	63	1.3e-14	63	yes		Pseudomonas aeruginosa PAO1	hypothetical protein PA0572	HEVGHNSAEAPFNVDGATE	[1310,1314]	HEVGH
YP_788743.1	6e-39	166	NA	NA	0	YP_788743.1	63	1.1e-14	63	yes		Pseudomonas aeruginosa UCBPP-PA14	hypothetical protein PA14_07430	HEVGHNSAEAPFNVDGATE	[1310,1314]	HEVGH
ZP_04936986.1	6e-39	166	NA	NA	0	ZP_04936986.1	62	2.7e-14	62	yes		Pseudomonas aeruginosa 2192	hypothetical protein PA2G_04490	HEVGHNAAEAPFVVEGATE	[1297,1301]	HEVGH
NP_716077.1	1e-36	158	NA	NA	0	NP_716077.1	62	3e-14	62	yes		Shewanella oneidensis MR-1	hypothetical protein SO_0440	HEVGHNSAEAPFNVDGATE	[1314,1318]	HEVGH
XP_001319601.1	9e-38	162	NA	NA	0	XP_001319601.1	61	4.8e-14	61	yes		Trichomonas vaginalis G3	Immuno-dominant variable surface antigen-like	HEVGHNSAEAPFNVDGATE	[1310,1314]	HEVGH
YP_001048819.1	2e-30	137	NA	NA	0	YP_001048819.1	59	2.1e-13	59	yes		Shewanella baltica OS155	hypothetical protein Sbal_0418	HEVGHNLASAPFSAPGSTEVTNNLLALYMQELE	[1272,1276]	HEVGH
YP_732580.1	4e-33	146	NA	NA	0	YP_732580.1	58	3.7e-13	58	yes		Shewanella sp. MR-4	hypothetical protein Shewmr4_0443	HEIGHNLAAAPFMMAGSTEVTNNILALYMQEQRE	[1259,1263]	HEIGH
YP_739623.1	2e-35	154	NA	NA	0	YP_739623.1	58	3.8e-13	58	yes		Shewanella sp. MR-7	hypothetical protein Shewmr7_3586	HEVGHNLASAPFMMAGSTEVTNNILALYMQEQRE	[1259,1263]	HEVGH
ZP_04922420.1	5e-53	212	NA	NA	0	ZP_04922420.1	58	4.4e-13	58	yes		Vibrio sp. Ex25	conserved hypothetical protein	HEVGHNAAEAPFNVDGATE	[1317,1321]	HEVGH
YP_001368103.1	2e-31	141	NA	NA	0	YP_001368103.1	57	1.1e-12	57	yes		Shewanella baltica OS185	hypothetical protein Shew185_3916		[709,713]	HELGH
YP_001556458.1	3e-31	140	NA	NA	0	YP_001556458.1	57	1e-12	57	yes		Shewanella baltica OS195	hypothetical protein Sbal195_4038	HEVGHNAAEAPFNVDGATE	[174,178]	HEVGH
YP_868088.1	7e-35	152	NA	NA	0	YP_868088.1	57	7.2e-13	57	yes		Shewanella sp. ANA-3	hypothetical protein Shewana3_0439	HEVGHNAAEAPFNVDGATE	[1317,1321]	HEVGH
ZP_01260413.1	1e-53	214	NA	NA	0	ZP_01260413.1	57	8.4e-13	57	yes		Vibrio alginolyticus 12G01	hypothetical protein V12G01_20798	HEVGHNSAEAPFNVDGATE	[1338,1342]	HEVGH
ZP_05945865.1	6e-49	199	NA	NA	0	ZP_05945865.1	57	1.2e-12	57	yes		Vibrio orientalis CIP 102891	hypothetical protein VIA_003317	HEVGHNAAEAPFVVEGATE	[1286,1290]	HEVGH
YP_003286593.1	2e-54	217	NA	NA	0	YP_003286593.1	57	1.2e-12	57	yes		Vibrio sp. Ex25	hypothetical protein VEA_003968	HEVGHNAAEAPFVVEGATE	[1155,1159]	HEVGH
ZP_02953260.1	2e-41	174	NA	NA	0	ZP_02953260.1	56	2.3e-12	56	yes	1	Clostridium perfringens D str. JGS1721	discoidin domain protein	HEVGHNLASAPFNVVGSTEVVNNILALYMQEKRE	[1224,1228]	HEVGH
YP_001093051.1	1e-41	175	NA	NA	0	YP_001093051.1	56	2.5e-12	56	yes		Shewanella loihica PV-4	hypothetical protein Shew_0921	HELGHGLEKGRFRFAGWE	[685,689]	HELGH
YP_001920091.1	1e-51	208	NA	NA	0	YP_001920091.1	55	3.9e-12	55	yes		Clostridium botulinum E3 str. Alaska E43	fibronectin type III domain protein	HELGHGLEKGRFRFAGWE	[685,689]	HELGH
ZP_02076735.1	3e-43	180	NA	NA	0	ZP_02076735.1	55	3.9e-12	55	yes		Eubacterium dolichum DSM 3991	hypothetical protein EUBDOL_00526	HEVGHNAAEAPFVVEGATE	[1286,1290]	HEVGH
YP_002359742.1	2e-30	137	NA	NA	0	YP_002359742.1	55	3.3e-12	55	yes		Shewanella baltica OS223	hypothetical protein Sbal223_3842	HELGHGLEKGRFRFAGWE	[685,689]	HELGH
ZP_01990000.1	1e-51	208	NA	NA	0	ZP_01990000.1	55	3.7e-12	55	yes		Vibrio parahaemolyticus AQ3810	conserved hypothetical protein	HELGHGLEKGRFRFAGWE	[685,689]	HELGH
NP_935128.1	4e-45	186	NA	NA	0	NP_935128.1	55	3.5e-12	55	yes		Vibrio vulnificus YJ016	hypothetical protein VV2335	HEVGHNAAEAPFVVEGATE	[1286,1290]	HEVGH
ZP_04823618.1	1e-50	204	NA	NA	0	ZP_04823618.1	54	9.2e-12	54	yes		Clostridium botulinum E1 str. 'BoNT E Beluga'	fibronectin type III domain protein	HELGHGLERGRFRFAGWE	[690,694]	HELGH
YP_926273.1	3e-31	140	NA	NA	0	YP_926273.1	54	7.9e-12	54	yes		Shewanella amazonensis SB2B	hypothetical protein Sama_0393	HELGHGLEKGRFRFAGWE	[685,689]	HELGH
ZP_06181693.1	2e-53	213	NA	NA	0	ZP_06181693.1	54	5.7e-12	54	yes		Vibrio alginolyticus 40B	hypothetical protein VMC_31230	HELGHGLEKGRFRFAGWE	[366,370]	HELGH
ZP_05730303.1	2e-29	134	NA	NA	0	ZP_05730303.1	53	1.6e-11	53	yes		Pantoea sp. At-9b	hypothetical protein Pat9bDRAFT_3619	HELGHGLEKGRFRFAGWE	[708,712]	HELGH
YP_001500761.1	4e-44	183	NA	NA	0	YP_001500761.1	53	1.8e-11	53	yes		Shewanella pealeana ATCC 700345	hypothetical protein Spea_0899		[740,744]	HELGH
ZP_05776554.1	4e-50	203	NA	NA	0	ZP_05776554.1	53	1.4e-11	53	yes		Vibrio parahaemolyticus K5030	hypothetical protein VparK_11235	HELGHGLERGRFRFAGWE	[690,694]	HELGH
ZP_05906413.1	4e-50	203	NA	NA	0	ZP_05906413.1	53	1.4e-11	53	yes		Vibrio parahaemolyticus Peru-466	hypothetical protein VparP_17696	HEVGHNAAEAPFNVDGATE	[1296,1300]	HEVGH
NP_797381.1	4e-50	203	NA	NA	0	NP_797381.1	53	1.4e-11	53	yes		Vibrio parahaemolyticus RIMD 2210633	hypothetical protein VP1002	HELGHGLEKGRFRFAGWE	[685,689]	HELGH
ZP_01814153.1	6e-44	182	NA	NA	0	ZP_01814153.1	53	1.9e-11	53	yes		Vibrionales bacterium SWAT-3	hypothetical protein VSWAT3_23194	HELGHNQQKTNWELPPHTTEATCNLWSVYVHE	[739,743]	HELGH
ZP_06051982.1	1e-36	158	NA	NA	0	ZP_06051982.1	52	2.5e-11	52	yes		Grimontia hollisae CIP 101886	hypothetical protein VHA_001146	HEIGHAYDLVFTQGTNLHE	[247,251]	HEIGH
ZP_05911847.1	2e-50	204	NA	NA	0	ZP_05911847.1	52	2.7e-11	52	yes		Vibrio parahaemolyticus AQ4037	hypothetical protein VparAQ_22344	HELGHHYQMPAWTFDNDTE	[298,302]	HELGH
ZP_02426874.1	2e-38	164	NA	NA	0	ZP_02426874.1	51	7e-11	51	yes		Clostridium ramosum DSM 1402	hypothetical protein CLORAM_00251	HEIAHGYQGGFIDDKYFSTRE	[245,249]	HEIAH
ZP_04563254.1	4e-38	163	NA	NA	0	ZP_04563254.1	51	7e-11	51	yes		Mollicutes bacterium D7	conserved hypothetical protein	HEIAHGYQGGFIDDKYFSTRE	[245,249]	HEIAH
ZP_05120656.1	7e-48	195	NA	NA	0	ZP_05120656.1	51	8.7e-11	51	yes		Vibrio parahaemolyticus 16	hypothetical protein VPMS16_1840	HEIAHGYQGGFIDDKYFSTRE	[222,226]	HEIAH
NP_760966.1	9e-45	185	NA	NA	0	NP_760966.1	51	6.6e-11	51	yes		Vibrio vulnificus CMCP6	hypothetical protein VV1_2105	HELGHHYQMPAWTFDNDTE	[295,299]	HELGH
XP_001319226.1	3e-12	77.1	NA	NA	0	XP_001319226.1	50	1.4e-10	50	yes		Trichomonas vaginalis G3	hypothetical protein	HEIAHGYQGGFIDDKYFSTRE	[245,249]	HEIAH
XP_001327547.1	8e-24	116	NA	NA	0	XP_001327547.1	49	2.7e-10	49	yes		Trichomonas vaginalis G3	hypothetical protein	HEIAHGYQGGFIDDKYFSTRE	[250,254]	HEIAH
ZP_03292590.1	3e-38	163	NA	NA	0	ZP_03292590.1	48	5.4e-10	48	yes		Clostridium hiranonis DSM 13275	hypothetical protein CLOHIR_00533	HEIAHGYQGGFIDDKYFSTRE	[222,226]	HEIAH
NP_757817.1	9e-19	99.1	NA	NA	0	NP_757817.1	48	5.9e-10	48	yes		Mycoplasma penetrans HF-2	putative integral membrane protein	HEIAHGYQGGFIDDKYFSTRE	[245,249]	HEIAH
YP_001673185.1	3e-43	179	NA	NA	0	YP_001673185.1	48	6.6e-10	48	yes		Shewanella halifaxensis HAW-EB4	hypothetical protein Shal_0951	HEIAHGYQGGFIDDKYFSTRE	[245,249]	HEIAH
ZP_01955094.1	3e-34	150	NA	NA	0	ZP_01955094.1	48	7e-10	48	yes		Vibrio cholerae MZO-3	conserved hypothetical protein	HEIAHGYQGGFIDDKYFSTRE	[222,226]	HEIAH
ZP_06117837.1	7e-41	172	NA	NA	0	ZP_06117837.1	46	1.5e-09	46	yes		Clostridium hathewayi DSM 13479	coagulation factor 5/8 type domain protein	HEIAHGYQGGFIDDKYFSTRE	[245,249]	HEIAH
YP_434232.1	2e-36	157	NA	NA	0	YP_434232.1	46	2.8e-09	46	yes		Hahella chejuensis KCTC 2396	hypothetical protein HCH_03041	HEIAHGYQGGFIDDKYFSTRE	[250,254]	HEIAH
ZP_01064757.1	4e-47	193	NA	NA	0	ZP_01064757.1	45	3.2e-09	45	yes		Vibrio sp. MED222	hypothetical protein MED222_12503	HEIAHGYQGGFIDDKYFSTRE	[245,249]	HEIAH
YP_002416673.1	2e-46	191	NA	NA	0	YP_002416673.1	44	1.1e-08	44	yes		Vibrio splendidus LGP32	hypothetical protein VS_1058	HEIAHGYQGGFIDDKYFSTRE	[245,249]	HEIAH
XP_001580677.1	3e-18	97.1	NA	NA	0	XP_001580677.1	43	1.3e-08	43	yes		Trichomonas vaginalis G3	hypothetical protein	HEIAHGYQGGFIDDKYFSTRE	[245,249]	HEIAH
XP_001583210.1	2e-28	131	NA	2e-05	17.9	XP_001583210.1	60	9.7e-14	42.1	yes		Trichomonas vaginalis G3	F5/8 type C domain containing protein	HEIGHNQAANWLNVVGAGETANNVLALYTQE	[1334,1338]	HEIGH	154420390
ZP_05981011.2	1e-45	188	NA	NA	0	ZP_05981011.2	42	3.3e-08	42	yes		Subdoligranulum variabile DSM 15176	putative fibronectin type III domain protein	HEIAHGYQGGFIDDKYFSTRE	[245,249]	HEIAH
ZP_01802287.1	3e-26	124	NA	NA	0	ZP_01802287.1	39	2.9e-07	39	yes		Clostridium difficile QCD-32g58	hypothetical protein CdifQ_04003262	HEIAHGYQGGFIDDKYFSTRE	[245,249]	HEIAH
YP_003182171.1	2e-35	154	NA	0.011	8.8	YP_003182171.1	43	2e-08	34.2	yes		Eggerthella lenta DSM 2243	coagulation factor 5/8 type domain protein	HEIAHGYQGGFIDDKYFSTRE	[245,249]	HEIAH	257791565
ZP_02240735.1	5e-20	103	2e-50	1.4e-54	180.4	ZP_02240735.1	63	1.6e-14	-117.4	no	1	Paenibacillus larvae subsp. larvae BRL-230010	enhancin family protein	HEVGHNAAEAPFVVEGATE	[1297,1301]	HEVGH	166240863
ZP_05862111.1	2e-21	108	2.1e-22	5.7e-61	201.6	ZP_05862111.1	43	2.2e-08	-158.6	no		Lactobacillus jensenii 115-3-CHN	enhancing factor	HEIAHGYQGGFIDDKYFSTRE	[245,249]	HEIAH	260661197
ZP_05556372.1	6e-22	109	2.1e-22	1.2e-60	200.6	ZP_05556372.1	42	3.7e-08	-158.6	no		Lactobacillus jensenii 27-2-CHN	enhancin family protein	HEIAHGYQGGFIDDKYFSTRE	[250,254]	HEIAH	256850983
ZP_06337521.1	2e-21	108	2.7e-22	1.3e-60	200.4	ZP_06337521.1	41	8.3e-08	-159.4	no		Lactobacillus jensenii 208-1	putative enhancing factor	HEIAHGYQGGFIDDKYFSTRE	[250,254]	HEIAH	282932063
ZP_02954459.1	7e-37	159	6.8e-69	2e-92	305.6	ZP_02954459.1	68	4.3e-16	-237.6	no	1	Clostridium perfringens D str. JGS1721	putative enhancin family protein	HEIGHGYQGVFMNDVDLPVGE	[240,244]	HEIGH	182626718
ZP_02329259.1	4e-26	123	6.1e-105	1.1e-101	336.3	ZP_02329259.1	77	1e-18	-259.3	no	1	Paenibacillus larvae subsp. larvae BRL-230010	enhancin family protein	HELGHNQQRHGWEFPPHTTEATCNLWSVYVHE	[909,913]	HELGH	167464170
ZP_02954276.1	5e-39	166	3.8e-74	9.5e-106	349.7	ZP_02954276.1	72	2.4e-17	-277.7	no	1	Clostridium perfringens D str. JGS1721	LRR adjacent family	HELGHNLQVNRLKVYGGRSGE	[670,674]	HELGH	182626527
ZP_04624151.1	2e-17	94.8	3.3e-149	1.1e-115	382.5	ZP_04624151.1	63	1.2e-14	-319.5	no		Yersinia kristensenii ATCC 33638	Enhancing factor (Viral)	HEVGHNSAEAPFNVDGATE	[1310,1314]	HEVGH	238763185
YP_245638.1	6e-37	159	2e-104	2.9e-125	414.2	YP_245638.1	69	2.6e-16	-345.2	no	1	Bacillus cereus E33L	enhancin family protein	HELGHNHQKPGWTFRPHTTEALCNLWSIYVHE	[748,752]	HELGH	67078018
ZP_04274345.1	2e-39	167	3.6e-105	2.3e-126	417.9	ZP_04274345.1	69	2.5e-16	-348.9	no	1	Bacillus cereus BDRD-ST24	Metallprotease, enhancin				229145966
NP_848341.1	7e-16	89.4	4.5e-76	7.7e-122	402.9	NP_848341.1	47	9e-10	-355.9	no		Choristoneura fumiferana MNPV	enhancin-like	HEIAHGYQGGFIDDKYFSTRE	[245,249]	HEIAH	30387262
ZP_04234601.1	1e-41	174	2.5e-132	1.4e-151	501.3	ZP_04234601.1	67	7.1e-16	-434.3	no	1	Bacillus cereus Rock3-28	Metallprotease, enhancin	HEIGHGYQGVFMNDVDLPVGE	[240,244]	HEIGH	229103923
ZP_04085415.1	5e-41	173	8.1e-133	4.2e-153	506.2	ZP_04085415.1	69	1.7e-16	-437.2	no	1	Bacillus thuringiensis serovar huazhongensis BGSC 4BD1	Metallprotease, enhancin	HELGHNQQRSGWEFRPHTTEATCNLWSVYVHE	[758,762]	HELGH	228922105
ZP_05185152.1	2e-42	177	2.8e-135	1.2e-153	508.1	ZP_05185152.1	67	1.1e-15	-441.1	no	1	Bacillus anthracis str. A1055	metallprotease, enhancin family protein	HEVGHNFQQTSTWSWSDLGE	[334,338]	HEVGH	254723364
NP_833119.1	6e-41	172	1.9e-129	4.4e-153	506.2	NP_833119.1	65	4.6e-15	-441.2	no	1	Bacillus cereus ATCC 14579	enhancin	HEVGHNSAEAPFNVDGATE	[1310,1314]	HEVGH	30021488
ZP_04257640.1	3e-41	173	1.3e-134	2.7e-154	510.2	ZP_04257640.1	68	5.4e-16	-442.2	no	1	Bacillus cereus BDRD-Cer4	Metallprotease, enhancin	HEIGHGYQGVFMNDVDLPVGE	[240,244]	HEIGH	229128662
ZP_00393637.1	4e-42	176	8.8e-135	2e-154	510.6	ZP_00393637.1	67	1.1e-15	-443.6	no	1	Bacillus anthracis str. A2012	hypothetical protein Bant_01004104	HEVGHVHQTRPYLSWGGLGE	[332,336]	HEVGH	65320678
YP_020076.1	4e-42	176	2.8e-135	1.1e-154	511.4	YP_020076.1	67	1.1e-15	-444.4	no	1	Bacillus anthracis str. 'Ames Ancestor'	enhancin family protein	HELGHNMQQGRVWSFDGNGE	[327,331]	HELGH	47528727
NP_845726.1	4e-42	176	2.8e-135	1.1e-154	511.4	NP_845726.1	67	1.1e-15	-444.4	no	1	Bacillus anthracis str. Ames	enhancin family protein	HEFGHLMQMQPIDWDGLGEVTVNIFSLKAE	[309,313]	HEFGH	30263349
ZP_05213285.1	4e-42	176	2.8e-135	1.1e-154	511.4	ZP_05213285.1	67	1.1e-15	-444.4	no	1	Bacillus anthracis str. Australia 94	metallprotease, enhancin family protein	HEFGHVNQVRPNMKWVGTTE	[300,304]	HEFGH	254761261
YP_002813791.1	4e-42	176	2.8e-135	1.1e-154	511.4	YP_002813791.1	67	1.1e-15	-444.4	no	1	Bacillus anthracis str. CDC 684	metallprotease, enhancin family	HEVGHNFQQTSTWSWSDLGE	[334,338]	HEVGH	227813782
YP_029447.1	4e-42	176	2.8e-135	1.1e-154	511.4	YP_029447.1	67	1.1e-15	-444.4	no	1	Bacillus anthracis str. Sterne	enhancin family protein	HEVGHVHQTRPYLSWGGLGE	[332,336]	HEVGH	49186195
ZP_05204784.1	4e-42	176	2.8e-135	1.1e-154	511.4	ZP_05204784.1	67	1.1e-15	-444.4	no	1	Bacillus anthracis str. Vollum	metallprotease, enhancin family protein	HEFGHLMQMQPIDWDGLGEVTVNIFSLKAE	[309,313]	HEFGH	254752748
ZP_05196135.1	4e-42	176	2.8e-135	1.1e-154	511.4	ZP_05196135.1	67	1.1e-15	-444.4	no	1	Bacillus anthracis str. Western North Ameri	metallprotease, enhancin family protein	HEIGHNINQGSYAVVEVTNNYFSQISQAHE	[1179,1183]	HEIGH	254738432
ZP_02933074.1	4e-42	176	2.8e-135	1.1e-154	511.4	ZP_02933074.1	67	1.1e-15	-444.4	no		Bacillus anthracis str. A0174	metallprotease, enhancin family	HELGHNLQTNRLNVQYATAANSDNWTGYGSRAGE	[785,789]	HELGH	177650073
ZP_02395688.1	4e-42	176	2.8e-135	1.1e-154	511.4	ZP_02395688.1	67	1.1e-15	-444.4	no		Bacillus anthracis str. A0193	metallprotease, enhancin family	HELGHNLQTNRLNVQYATAANRDNWAGYGSRAGE	[785,789]	HELGH	167637408
YP_002867605.1	4e-42	176	2.8e-135	1.1e-154	511.4	YP_002867605.1	67	1.1e-15	-444.4	no		Bacillus anthracis str. A0248	metallprotease, enhancin family	HELGHNLQTNRLNVQYATAANRDNWAGYGSRAGE	[785,789]	HELGH	229603590
ZP_02895627.1	4e-42	176	2.8e-135	1.1e-154	511.4	ZP_02895627.1	67	1.1e-15	-444.4	no		Bacillus anthracis str. A0389	metallprotease, enhancin family	HELGHGLEKGKLRFDGHE	[771,775]	HELGH	170705162
ZP_02213488.1	4e-42	176	2.8e-135	1.1e-154	511.4	ZP_02213488.1	67	1.1e-15	-444.4	no		Bacillus anthracis str. A0488	metallprotease, enhancin family	HEFGHVNQVRPNMKWVGTTE	[299,303]	HEFGH	165868828
ZP_03017932.1	4e-42	176	2.8e-135	1.1e-154	511.4	ZP_03017932.1	67	1.1e-15	-444.4	no		Bacillus anthracis Tsiankovskii-I	metallprotease, enhancin family	HELGHNQQQQAWEFPPHTTEATCNLWSVYVHEE	[760,764]	HELGH	190565011
ZP_05149820.1	4e-42	176	NA	9.4e-155	511.7	ZP_05149820.1	67	1.1e-15	-444.7	no	1	Bacillus anthracis str. CNEVA-9066	metallprotease, enhancin family protein	HELGHNMQQGRVWSFDGNGE	[327,331]	HELGH	254685961
			NA	9.4e-155	511.7	ZP_05200087.1	67	1.1e-15	-444.7	no	1	Bacillus anthracis str. Kruger B	metallprotease, enhancin family protein	HEIGHLHQLWPITPYTVLGE	[304,308]	HEIGH	254742402
ZP_02390091.1	4e-42	176	1.5e-135	9.4e-155	511.7	ZP_02390091.1	67	1.1e-15	-444.7	no		Bacillus anthracis str. A0442	metallprotease, enhancin family	HEVGHNAAETPLTVPGATE	[1261,1265]	HEVGH	167631764
ZP_02876223.1	4e-42	176	NA	9.4e-155	511.7	ZP_02876223.1	67	1.1e-15	-444.7	no		Bacillus anthracis str. A0465	metallprotease, enhancin family	HEIGHLHQLWPITPYTVLGE	[304,308]	HEIGH	170684998
ZP_04097503.1	2e-41	174	NA	1.7e-154	510.9	ZP_04097503.1	66	1.3e-15	-444.9	no	1	Bacillus thuringiensis serovar andalousiensis BGSC 4AW1	Metallprotease, enhancin	HEYAHNFQQNWGFGWFYSYSE	[359,363]	HEYAH	228934670
YP_037494.1	2e-41	174	NA	1.7e-154	510.9	YP_037494.1	66	1.3e-15	-444.9	no	1	Bacillus thuringiensis serovar konkukian str. 97-27	enhancin family protein	HEYHHQFQNNWGWSYWGEVTNNVLNMIDMALLCE	[352,356]	HEYHH	49479004
ZP_04223521.1	7e-40	169	5.6e-137	5.7e-155	512.4	ZP_04223521.1	67	1.1e-15	-445.4	no	1	Bacillus cereus Rock3-42	Metallprotease, enhancin				229092349
ZP_04121263.1	2e-41	174	3.1e-136	3.8e-155	513	ZP_04121263.1	67	6.2e-16	-446	no	1	Bacillus thuringiensis serovar pakistani str. T13001	Metallprotease, enhancin	HEIGHGYQGVFMNDVDLPVGE	[240,244]	HEIGH	228959582
ZP_04079571.1	1e-41	174	2.2e-135	3.7e-155	513.1	ZP_04079571.1	67	8e-16	-446.1	no	1	Bacillus thuringiensis serovar pulsiensis BGSC 4CC1	Metallprotease, enhancin	HELGHNLQTNRLNVQYAAAGDGDNWAGYGSRAGE	[787,791]	HELGH	228915998
YP_002368097.1	2e-40	171	3.3e-136	1.2e-154	511.3	YP_002368097.1	65	3.4e-15	-446.3	no	1	Bacillus cereus B4264	metallprotease, enhancin family				218235717
YP_002452359.1	7e-42	175	6.1e-137	2.5e-155	513.6	YP_002452359.1	67	1.1e-15	-446.6	no	1	Bacillus cereus AH820	metallprotease, enhancin family				218904525
ZP_03105337.1	1e-41	174	0	2.4e-155	513.7	ZP_03105337.1	67	8.5e-16	-446.7	no	1	Bacillus cereus NVH0597-99	metallprotease, enhancin family	HELGHGLERGRLRFDGHE	[770,774]	HELGH	196038027
ZP_04140245.1	2e-40	171	NA	1.2e-155	514.7	ZP_04140245.1	67	8.3e-16	-447.7	no	1	Bacillus thuringiensis Bt407	Metallprotease, enhancin	HELGHNLQTNRLNVQYAAANNSDNWAGYSSRAGE	[789,793]	HELGH	228979925
ZP_04103016.1	2e-40	171	2.6e-137	1.2e-155	514.7	ZP_04103016.1	67	8.3e-16	-447.7	no	1	Bacillus thuringiensis serovar berliner ATCC 10792	Metallprotease, enhancin	HELGHNLQTNRLNVQYAAANNSDNWAGYSSRAGE	[789,793]	HELGH	228940447
ZP_04133950.1	2e-40	171	NA	1.2e-155	514.7	ZP_04133950.1	67	8.3e-16	-447.7	no	1	Bacillus thuringiensis serovar thuringiensis str. T01001	Metallprotease, enhancin		[768,772]	HELGH	228973362
ZP_04146606.1	1e-41	174	3.6e-135	2.6e-156	516.9	ZP_04146606.1	69	2.1e-16	-447.9	no	1	Bacillus thuringiensis serovar tochigiensis BGSC 4Y1	Metallprotease, enhancin				228986470
ZP_04252126.1	2e-41	174	NA	7.4e-156	515.4	ZP_04252126.1	67	1e-15	-448.4	no	1	Bacillus cereus 95/8201	Metallprotease, enhancin	HELGHNLQTNRLNVQYATAANSDNWTGYGSRAGE	[785,789]	HELGH	229122918
ZP_03102903.1	2e-41	174	0	7.4e-156	515.4	ZP_03102903.1	67	1e-15	-448.4	no	1	Bacillus cereus W	metallprotease, enhancin family		[768,772]	HELGH	196035499
ZP_04109312.1	2e-41	174	NA	7.4e-156	515.4	ZP_04109312.1	67	1e-15	-448.4	no	1	Bacillus thuringiensis serovar monterrey BGSC 4AJ1	Metallprotease, enhancin	HEIGHNLAAAPFNVKGATE	[1223,1227]	HEIGH	228947015
ZP_04091477.1	2e-41	174	1.8e-137	7.2e-156	515.4	ZP_04091477.1	67	8.4e-16	-448.4	no	1	Bacillus thuringiensis serovar pondicheriensis BGSC 4BA1	Metallprotease, enhancin	HEVGHNAAEAPFNVDGATE	[1294,1298]	HEVGH	228928437
ZP_04192671.1	7e-42	175	5.7e-137	9.4e-156	515	ZP_04192671.1	66	1.2e-15	-449	no	1	Bacillus cereus AH676	Metallprotease, enhancin	HEIGHQFQSNWGWGSYGEVTNNVLNYIHYSMMTE	[94,98]	HEIGH	229047048
ZP_04246240.1	3e-38	163	NA	8.4e-157	518.5	ZP_04246240.1	69	1.6e-16	-449.5	no	1	Bacillus cereus Rock1-3	Metallprotease, enhancin	HEYGHHYQTSYNSYGPFGE	[474,478]	HEYGH	229116856
ZP_04228801.1	3e-38	163	1.5e-137	8.4e-157	518.5	ZP_04228801.1	69	1.6e-16	-449.5	no	1	Bacillus cereus Rock3-29	Metallprotease, enhancin	HEYGHHYQTSYNSYGPFGE	[474,478]	HEYGH	229097848
ZP_04240369.1	4e-41	173	2.1e-138	1.4e-156	517.7	ZP_04240369.1	68	5.5e-16	-449.7	no	1	Bacillus cereus Rock1-15	Metallprotease, enhancin	HEIGHGYQGVFMNDVDPPVGE	[240,244]	HEIGH	229110806
ZP_04115705.1	2e-40	171	4.2e-137	1.6e-155	514.2	ZP_04115705.1	64	4.9e-15	-450.2	no	1	Bacillus thuringiensis serovar kurstaki str. T03a001	Metallprotease, enhancin	HEVGHNSAEAPFNVDGATE	[1310,1314]	HEVGH	228953665
YP_084679.1	1e-42	178	0	4.7e-157	519.3	YP_084679.1	69	2.7e-16	-450.3	no	1	Bacillus cereus E33L	enhancin family protein	HEFGHQNQMQWSWNGLGE	[333,337]	HEFGH	52142151
ZP_03230028.1	1e-40	171	0	4.9e-156	516	ZP_03230028.1	65	3.4e-15	-451	no	1	Bacillus cereus AH1134	metallprotease, enhancin family				206969073
ZP_04318470.1	1e-40	171	2.4e-139	1.8e-156	517.4	ZP_04318470.1	66	2.3e-15	-451.4	no	1	Bacillus cereus ATCC 10876	Metallprotease, enhancin				229191487
ZP_04213119.1	1e-40	171	1.8e-139	1.8e-156	517.4	ZP_04213119.1	66	2.2e-15	-451.4	no	1	Bacillus cereus Rock4-2	Metallprotease, enhancin				229080599
ZP_04301600.1	1e-42	178	1.2e-138	9.6e-158	521.6	ZP_04301600.1	70	1.3e-16	-451.6	no	1	Bacillus cereus MM3	Metallprotease, enhancin	HEYGHHYQTSYNSYGLFGE	[449,453]	HEYGH	229174064
ZP_04307018.1	2e-40	171	4.5e-140	1e-156	518.2	ZP_04307018.1	66	2.1e-15	-452.2	no	1	Bacillus cereus 172560W	Metallprotease, enhancin				229179668
ZP_03218530.1	1e-24	118	0	4.9e-153	506	ZP_03218530.1	53	1.4e-11	-453	no		Salmonella enterica subsp. enterica serovar Javiana str. GA_	viral enhancin protein	HEVGHNAAEAPFNVDGATE	[1315,1319]	HEVGH	204927328
YP_002242378.1	6e-25	119	0	4e-152	503	YP_002242378.1	50	1.5e-10	-453	no		Salmonella enterica subsp. enterica serovar Enteri	putative viral enhancing factor	HEIAHGYQGGFIDDKYFSTRE	[245,249]	HEIAH	207855727
ZP_04204064.1	2e-40	171	6.4e-140	8.5e-157	518.5	ZP_04204064.1	65	3.3e-15	-453.5	no	1	Bacillus cereus F65185	Metallprotease, enhancin	HEYAHHFQNGWTYGNWGEVSNNALNLISMATMME	[38,42]	HEYAH	229070836
YP_002214171.1	5e-25	119	0	4.2e-153	506.3	YP_002214171.1	50	1.5e-10	-456.3	no		Salmonella enterica subsp. enterica serovar Dublin str. CT_	viral enhancin protein	HEIAHGYQGGFIDDKYFSTRE	[245,249]	HEIAH	198246109
YP_002113233.1	8e-25	119	NA	2.8e-154	510.1	YP_002113233.1	52	3.8e-11	-458.1	no		Salmonella enterica subsp. enterica serovar Schwarzengrund	viral enhancin protein	HELGHHYQMPAWTFNGNTE	[298,302]	HELGH	194735270
ZP_02660045.1	8e-25	119	1.3e-146	2.8e-154	510.1	ZP_02660045.1	52	3.8e-11	-458.1	no		Salmonella enterica subsp. enterica serovar Schwarzengrund s	viral enhancin protein	HEIAHGYQGGFIDDKYFSTRE	[250,254]	HEIAH	168234987
YP_002854632.1	3e-14	84	2.8e-172	6.2e-168	555.3	YP_002854632.1	45	3.5e-09	-510.3	no		Euproctis pseudoconspersa nucleopolyhedrovirus	vef	HEIAHGYQGGFIDDKYFSTRE	[250,254]	HEIAH	228861612
ZP_06206112.1	2e-22	110	5.5e-242	4.5e-175	578.9	ZP_06206112.1	66	1.5e-15	-512.9	no		Yersinia pestis KIM D27	viral enhancin protein				270489038
XP_002544486.1	6e-31	139	0	4.8e-235	777.2	XP_002544486.1	74	6.2e-18	-703.2	no		Uncinocarpus reesii 1704	hypothetical protein UREG_04003	HELGHNHQKGDWTFQGTGE	[625,629]	HELGH	258571365
YP_002804477.1	3e-35	154	0	1e-247	819.1	YP_002804477.1	72	2.3e-17	-747.1	no		Clostridium botulinum A2 str. Kyoto	viral enhancin protein	HELGHNLQVNRLKVYGGRSGE	[681,685]	HELGH	226949386
YP_001781652.1	2e-33	147	0	1.3e-246	815.4	YP_001781652.1	66	1.8e-15	-749.4	no		Clostridium botulinum B1 str. Okra	enhancing factor	HEYHHHFQSGWGFANPGEVTNNVLNLIDMVLICE	[351,355]	HEYHH	170756226
ZP_02618432.1	1e-33	148	0	1.7e-247	818.4	ZP_02618432.1	67	8.2e-16	-751.4	no		Clostridium botulinum Bf	enhancing factor	HELGHNLQTNRLNVQYAAANNSDNWAGYSSRAGE	[789,793]	HELGH	168183768
YP_002863079.1	2e-33	147	0	1e-247	819.2	YP_002863079.1	67	8.2e-16	-752.2	no		Clostridium botulinum Ba4 str. 657	enhancing factor	HELGHNLQTNRLNVQYAAANNSDNRAGYSSRAGE	[783,787]	HELGH	237795527
YP_001391397.1	3e-34	150	0	2.2e-254	841.2	YP_001391397.1	71	5.9e-17	-770.2	no		Clostridium botulinum F str. Langeland	enhancing factor	HESGHQRQIDPMTWAGMTEVTVNIYSLATQE	[214,218]	HESGH	153941402
ZP_02239994.1	1e-22	111	NA	3.2e-254	840.7	x	65	4.1e-15	-775.7	no		Yersinia pestis biovar Antiqua str. B42003004	viral enhancin protein				166213959
ZP_02222610.1	1e-22	111	0	3.2e-254	840.7	ZP_02222610.1	65	4.1e-15	-775.7	no		Yersinia pestis biovar Orientalis str. F1991016	viral enhancin protein				165926778
ZP_02311074.1	1e-22	111	NA	3.2e-254	840.7	ZP_02311074.1	65	4.1e-15	-775.7	no		Yersinia pestis biovar Orientalis str. MG05-1020	viral enhancin protein				167419321
YP_001649135.1	2e-12	78.3	0	6.4e-255	843	YP_001649135.1	56	1.7e-12	-787	no		Helicoverpa armigera granulovirus	enhancin-3	HELGHGLEKGRFRFAGWE	[685,689]	HELGH	164519348
NP_059302.1	6e-12	76.3	0	3.7e-254	840.4	NP_059302.1	52	2.6e-11	-788.4	no		Xestia c-nigrum granulovirus	ORF154	HELGHAYDFVFTVNTRLIE	[244,248]	HELGH	9635404
NP_613172.1	3e-08	64	0	5.6e-250	826.6	NP_613172.1	34	7.6e-06	-792.6	no		Mamestra configurata NPV-A	viral enhancing factor VEF	HELGHHYQMPAWTFDNDVE	[297,301]	HELGH	20069968
YP_001605310.1	1e-22	111	NA	3.1e-261	863.8	YP_001605310.1	65	4.3e-15	-798.8	no		Yersinia pestis Angola	enhancing factor				162418142
YP_653848.1	1e-22	111	0	3.1e-261	863.8	YP_653848.1	65	4.3e-15	-798.8	no		Yersinia pestis Antiqua	enhancing factor	HEYGHHFQSGWGISGTGETTNNVINFITYAMLTE	[361,365]	HEYGH	108809932
ZP_02231354.1	1e-22	111	NA	3.1e-261	863.8	ZP_02231354.1	65	4.3e-15	-798.8	no		Yersinia pestis biovar Antiqua str. E1979001	viral enhancin protein				166010456
ZP_02307965.1	1e-22	111	NA	3.1e-261	863.8	ZP_02307965.1	65	4.3e-15	-798.8	no		Yersinia pestis biovar Antiqua str. UG05-0454	viral enhancin protein				167402512
ZP_02317890.1	1e-22	111	NA	3.1e-261	863.8	ZP_02317890.1	65	4.3e-15	-798.8	no		Yersinia pestis biovar Mediaevalis str. K1973002	viral enhancin protein	HEWGHHYDNRDTTEAE	[415,419]	HEWGH	167426137
NP_991886.1	1e-22	111	NA	3.1e-261	863.8	NP_991886.1	65	4.3e-15	-798.8	no		Yersinia pestis biovar Microtus str. 91001	enhancing factor	HEYAHHFQYFWGWGDYGEVSNNVLNLISMSLMTE	[355,359]	HEYAH	45440347
ZP_04462443.1	1e-22	111	NA	3.1e-261	863.8	ZP_04462443.1	65	4.3e-15	-798.8	no		Yersinia pestis biovar Orientalis str. India 195	Enhancing factor	HENGHAYDFGPTEEAE	[371,375]	HENGH	229842288
ZP_02224939.1	1e-22	111	NA	3.1e-261	863.8	ZP_02224939.1	65	4.3e-15	-798.8	no		Yersinia pestis biovar Orientalis str. IP275	viral enhancin protein	HEYAHHFQNGWEFGAWGEVSNNVLNLISMSLMTE	[355,359]	HEYAH	165936371
ZP_04460366.1	1e-22	111	NA	3.1e-261	863.8	ZP_04460366.1	65	4.3e-15	-798.8	no		Yersinia pestis biovar Orientalis str. PEXU2	Enhancing factor	HEIGHGYQGGFMSDRYLGTGE	[244,248]	HEIGH	229840207
ZP_01917344.1	1e-22	111	NA	3.1e-261	863.8	ZP_01917344.1	65	4.3e-15	-798.8	no		Yersinia pestis CA88-4125	enhancin	HEIGHNHQRGNFTFEGTGEVTNNVFGLYCYTE	[603,607]	HEIGH	150260616
YP_002345418.1	1e-22	111	NA	3.1e-261	863.8	YP_002345418.1	65	4.3e-15	-798.8	no		Yersinia pestis CO92	enhancing factor (viral)	HELGHGLEKGRFRFSGWE	[685,689]	HELGH	218927543
ZP_02335350.1	1e-22	111	NA	3.1e-261	863.8	ZP_02335350.1	65	4.3e-15	-798.8	no		Yersinia pestis FV-1	enhancing factor (viral)	HELGHGLEKGRFRFSGWE	[685,689]	HELGH	167470646
NP_667934.1	1e-22	111	0	3.1e-261	863.8	NP_667934.1	65	4.3e-15	-798.8	no		Yersinia pestis KIM	enhancing factor	HEVGHNSAEAPFNVDGATE	[1310,1314]	HEVGH	22124511
ZP_04519087.1	1e-22	111	NA	3.1e-261	863.8	ZP_04519087.1	65	4.3e-15	-798.8	no		Yersinia pestis Nepal516	Enhancing factor	HEVGHNSAEAPFNVDGATE	[1310,1314]	HEVGH	229903974
YP_649257.1	1e-22	111	NA	3.1e-261	863.8	YP_649257.1	65	4.3e-15	-798.8	no		Yersinia pestis Nepal516	enhancing factor	HEVGHNAAEAPFVVEGATE	[1294,1298]	HEVGH	108813490
ZP_04456764.1	1e-22	111	NA	3.1e-261	863.8	ZP_04456764.1	65	4.3e-15	-798.8	no		Yersinia pestis Pestoides A	Enhancing factor	HEVGHNAAEAPFVVEGATE	[1294,1298]	HEVGH	229836598
YP_001164956.1	1e-22	111	0	3.1e-261	863.8	YP_001164956.1	65	4.3e-15	-798.8	no		Yersinia pestis Pestoides F	enhancing factor	HEVGHNAAEAPFVVEGATE	[1297,1301]	HEVGH	145600880
YP_001870865.1	5e-24	116	0	1.1e-261	865.4	YP_001870865.1	65	4.3e-15	-800.4	no		Yersinia pseudotuberculosis PB1/+	peptidase M60 viral enhancin protein	HEVGHNAAEAPFNVDGATE	[1315,1319]	HEVGH	186893753
YP_001402703.1	5e-24	116	0	1.6e-262	868.1	YP_001402703.1	65	4.3e-15	-803.1	no		Yersinia pseudotuberculosis IP 31758	viral enhancin protein	HEVGHNSAEAPFNVDGATE	[1310,1314]	HEVGH	153947720
YP_001722552.1	5e-24	116	NA	1.5e-262	868.2	YP_001722552.1	65	4.3e-15	-803.2	no		Yersinia pseudotuberculosis YPIII	peptidase M60 viral enhancin protein	HEVGHNSAEAPFNVDGATE	[1310,1314]	HEVGH	170026047
NP_047797.1	2e-22	111	0	4.1e-255	843.6	NP_047797.1	39	3e-07	-804.6	no		Lymantria dispar MNPV	viral enhancing factor 2	HEIAHGYQGGFIDDKYFSTRE	[245,249]	HEIAH	9631127
NP_047702.1	2e-15	87.9	0	3.1e-261	863.8	NP_047702.1	57	8.5e-13	-806.8	no		Lymantria dispar MNPV	viral enhancing factor 1	HEVGHNAAEAPFNVDGATE	[1320,1324]	HEVGH	9631032
YP_068937.1	5e-24	116	0	7e-264	872.6	YP_068937.1	65	4.3e-15	-807.6	no		Yersinia pseudotuberculosis IP 32953	enhancing factor	HEVGHNSAEAPFNVDGATE	[1310,1314]	HEVGH	51594746
YP_001649134.1	4e-21	107	0	6.6e-271	895.8	YP_001649134.1	57	1.2e-12	-838.8	no		Helicoverpa armigera granulovirus	enhancin-2	HELGHGLEKGRFRFADWE	[727,731]	HELGH	164519347
XP_001817345.1	3e-32	143	0	1.8e-276	914.2	XP_001817345.1	74	5.5e-18	-840.2	no	1	Aspergillus oryzae RIB40	hypothetical protein	HEIGHNLASAPFSMTGGTEVTNNILALYMQE	[1302,1306]	HEIGH	169765748
XP_002372411.1	4e-32	143	0	1.2e-276	914.8	XP_002372411.1	74	5.5e-18	-840.8	no	1	Aspergillus flavus NRRL3357	viral-enhancing factor, putative	HELGHTYEPMKENFNLFSEIQVNRYSIE	[325,329]	HELGH	238482345
NP_059300.1	6e-22	109	0	5.6e-277	915.9	NP_059300.1	55	2.7e-12	-860.9	no		Xestia c-nigrum granulovirus	ORF152	HEVGHNAAEAPFVVEGATE	[1286,1290]	HEVGH	9635402

## Sheet: PF13402 and PF03272 positive
PSI-Blast ReSeq accession	PSI-Blast e-value	PSI-Blast score	M60 enhancin PF03272 ipr e-value	Enhancin PF03272 HMMER E-value	Enhancin PF03272 HMMER score	HMMER RefSeq accession	M60-like PF13402 HMMER score	M60-like PF13402 HMMER E-value	PF13402 minus PF03272 HMMER scores	M60-like PF13402 415 dataset	Taxa with both PF13402 & PF03272 hits	Taxa	Description	gluzincin-like sequence	HEXXH position	HEXXH motif	gi
YP_086361.1	2e-85	320	NA	4.9e-12	39.8	YP_086361.1	303	1.6e-87	263.2	yes	1	Bacillus cereus E33L	wall-associated protein	HEVGHLHQQEPWKWSKVRE	[234,238]	HEVGH	52140468
YP_003244709.1	3e-90	336	NA	5.6e-12	39.6	YP_003244709.1	290	1.2e-83	250.4	yes		Geobacillus sp. Y412MC10	hypothetical protein GYMC10_4682	HEAGHQRQQTPWTWDGLGE	[262,266]	HEAGH	261408468
ZP_04286723.1	2e-85	320	1.7e-06	6e-12	39.5	ZP_04286723.1	300	7.9e-87	260.5	yes		Bacillus cereus ATCC 4342	hypothetical protein bcere0010_48380	HEVGHLHQQEPWKWSKVRE	[291,295]	HEVGH	229158665
ZP_00238015.1	5e-87	325	NA	5.9e-11	36.2	ZP_00238015.1	307	6.7e-89	270.8	yes		Bacillus cereus G9241	reticulocyte binding protein	HEVGHQHQQDTWLWDGLGE	[281,285]	HEVGH	47567302
ZP_04148407.1	5e-88	329	4.1e-06	8.5e-11	35.7	ZP_04148407.1	308	2.8e-89	272.3	yes	1	Bacillus thuringiensis serovar tochigiensis BGSC 4Y1	hypothetical protein bthur0001_49700	HEIAHGYQAGFDNQGIFTGE	[264,268]	HEIAH	228988313
ZP_04320291.1	4e-89	332	NA	2.2e-10	34.3	ZP_04320291.1	310	6.7e-90	275.7	yes	1	Bacillus cereus ATCC 10876	hypothetical protein bcere0002_49870	HEIAHGYQAGFDNQGIFTGE	[264,268]	HEIAH	229193341
ZP_04081237.1	7e-87	325	NA	2.2e-10	34.3	ZP_04081237.1	305	3.9e-88	270.7	yes	1	Bacillus thuringiensis serovar pulsiensis BGSC 4CC1	hypothetical protein bthur0012_49000	HEIAHGYQAGFDNQGIFTGE	[264,268]	HEIAH	228917696
ZP_04074710.1	6e-93	345	NA	3.5e-10	33.6	ZP_04074710.1	307	9.6e-89	273.4	yes		Bacillus thuringiensis IBL 200	hypothetical protein bthur0013_50430	HEIAHGYQAGFDNQGIFTGE	[264,268]	HEIAH	228910901
ZP_04319929.1	2e-80	303	NA	3.9e-10	33.5	ZP_04319929.1	304	5.9e-88	270.5	yes	1	Bacillus cereus ATCC 10876	S-layer domain protein	HEVGHIHQQVPWLSEGMGE	[290,294]	HEVGH	229192972
ZP_04206946.1	2e-80	303	NA	4.1e-10	33.4	ZP_04206946.1	303	8.6e-88	269.6	yes	1	Bacillus cereus F65185	S-layer domain protein	HEVGHQHQQDTWLWDGLGE	[281,285]	HEVGH	229073860
ZP_04087070.1	2e-91	340	NA	4.4e-10	33.3	ZP_04087070.1	304	6.6e-88	270.7	yes	1	Bacillus thuringiensis serovar huazhongensis BGSC 4BD1	hypothetical protein bthur0011_47670	HEIAHGYQAGFDNQGIFTGE	[266,270]	HEIAH	228923792
ZP_04067686.1	1e-92	344	NA	4.5e-10	33.3	ZP_04067686.1	306	1.7e-88	272.7	yes		Bacillus thuringiensis IBL 4222	hypothetical protein bthur0014_47230	HEAGHLRQQSPWKFYNMTEVQNNIYSLSVE	[296,300]	HEAGH	228903564
ZP_00741467.1	7e-93	345	NA	4.5e-10	33.3	ZP_00741467.1	306	1.7e-88	272.7	yes		Bacillus thuringiensis serovar israelensis ATCC 35	Wall-associated protein precursor	HEAGHARQQYPWTWNDLRGMGE	[286,290]	HEAGH	75761505
ZP_04117796.1	1e-79	300	NA	4.8e-10	33.2	ZP_04117796.1	302	2.2e-87	268.8	yes	1	Bacillus thuringiensis serovar kurstaki str. T03a001	S-layer domain protein	HEVGHQHQQDTWLWDGLGE	[272,276]	HEVGH	228955817
YP_002448623.1	1e-92	344	NA	5.4e-10	33	YP_002448623.1	303	8.2e-88	270	yes		Bacillus cereus G9842	wall-associated protein	HEAGHLRQQSPWKFYNMTEVQNNIYSLSVE	[296,300]	HEAGH	218900212
ZP_04215346.1	1e-80	304	NA	6.8e-10	32.7	ZP_04215346.1	305	2.1e-88	272.3	yes	1	Bacillus cereus Rock4-2	S-layer domain protein	HEVGHLHQQRPWDWDAVGE	[291,295]	HEVGH	229082924
ZP_03233872.1	1e-79	300	NA	8.7e-10	32.3	ZP_03233872.1	304	5.9e-88	271.7	yes	1	Bacillus cereus AH1134	fibronectin type III domain protein	HEVGHLHQQAPWFWSGIGE	[292,296]	HEVGH	206972950
ZP_04309267.1	3e-80	303	NA	1.2e-09	31.9	ZP_04309267.1	305	3.2e-88	273.1	yes	1	Bacillus cereus 172560W	S-layer domain protein	HEAGHMRQQTPWNFKNMTEVQVNLYSLAVE	[296,300]	HEAGH	229181971
ZP_04111485.1	2e-79	300	NA	2.8e-09	30.7	ZP_04111485.1	298	4.1e-86	267.3	yes	1	Bacillus thuringiensis serovar monterrey BGSC 4AJ1	S-layer domain protein	HEVGHLHQQEPWKWSKVRE	[291,295]	HEVGH	228949218
ZP_04262242.1	2e-82	310	NA	2.9e-09	30.6	ZP_04262242.1	306	1.4e-88	275.4	yes		Bacillus cereus BDRD-ST196	S-layer domain protein	HEIAHGYQAGFDNQGIFTGE	[264,268]	HEIAH	229133414
ZP_04225257.1	4e-93	345	NA	3e-09	30.5	ZP_04225257.1	315	1.9e-91	284.5	yes	1	Bacillus cereus Rock3-42	hypothetical protein bcere0021_48880	HELGHNHQSPPFTMEGQTEVSVNIFSMVCE	[495,499]	HELGH	229094178
ZP_03231149.1	3e-90	336	NA	3.2e-09	30.4	ZP_03231149.1	302	2.8e-87	271.6	yes	1	Bacillus cereus AH1134	wall-associated protein	HEIAHGYQAGFDNQGIFTGE	[264,268]	HEIAH	206970196
ZP_04298287.1	5e-83	312	9.9e-06	3.5e-09	30.3	ZP_04298287.1	307	9.6e-89	276.7	yes		Bacillus cereus AH621	S-layer domain protein	HEVGHQHQQDTWLWDGLGE	[281,285]	HEVGH	229170643
ZP_04308684.1	5e-91	339	NA	3.8e-09	30.2	ZP_04308684.1	300	1.1e-86	269.8	yes	1	Bacillus cereus 172560W	hypothetical protein bcere0005_46970	HEVGHQHQQDTWLWDGLGE	[281,285]	HEVGH	229181355
ZP_04298280.1	2e-79	300	NA	3.7e-09	30.2	ZP_04298280.1	297	7.4e-86	266.8	yes		Bacillus cereus AH621	S-layer domain protein	HEVGHLHQQEPWKWSKVRE	[288,292]	HEVGH	229170635
NP_981496.1	2e-94	350	NA	3.9e-09	30.2	NP_981496.1	311	5.2e-90	280.8	yes		Bacillus cereus ATCC 10987	hypothetical protein BCE_5203	HELGHQRQITRTWSWRAMTEVTVNIYSLANLRE	[500,504]	HELGH	42784249
ZP_04194307.1	4e-90	335	NA	4.3e-09	30	ZP_04194307.1	302	2.8e-87	272	yes	1	Bacillus cereus AH676	hypothetical protein bcere0027_47080	HEAGHARQQYPWTWNDLRGMGE	[286,290]	HEAGH	229049750
ZP_04303264.1	1e-89	334	NA	4.8e-09	29.9	ZP_04303264.1	308	3.4e-89	278.1	yes	1	Bacillus cereus MM3	hypothetical protein bcere0006_48340	HEIAHGYQAGFDNQGIFTGE	[264,268]	HEIAH	229175758
YP_001645178.1	5e-84	315	NA	4.6e-09	29.9	YP_001645178.1	307	5e-89	277.1	yes		Bacillus weihenstephanensis KBAB4	S-layer domain-containing protein	HEIAHGYQAGFDNQGIFTGE	[264,268]	HEIAH	163940294
ZP_04242042.1	2e-90	337	NA	5.2e-09	29.8	ZP_04242042.1	301	6.4e-87	271.2	yes	1	Bacillus cereus Rock1-15	hypothetical protein bcere0018_47450	HEIAHGYQAGFDNQGIFTGE	[252,256]	HEIAH	229112505
ZP_04275957.1	1e-90	337	NA	5.5e-09	29.7	ZP_04275957.1	301	3.8e-87	271.3	yes	1	Bacillus cereus BDRD-ST24	hypothetical protein bcere0012_47390	HEVGHLHQQEPWKWSKVRE	[282,286]	HEVGH	229147613
YP_002341115.1	9e-92	341	NA	5.6e-09	29.7	YP_002341115.1	301	3.8e-87	271.3	yes		Bacillus cereus AH187	wall-associated protein	HEVGHLHQQEPWKWSKVRE	[288,292]	HEVGH	217962543
ZP_04270324.1	1e-91	340	NA	5.5e-09	29.7	ZP_04270324.1	301	3.7e-87	271.3	yes		Bacillus cereus BDRD-ST26	hypothetical protein bcere0013_48840	HEIAHGYQAGFDNQGIFTGE	[232,236]	HEIAH	229141796
ZP_03237588.1	6e-92	342	NA	5.6e-09	29.7	ZP_03237588.1	301	3.8e-87	271.3	yes		Bacillus cereus H3081.97	wall-associated protein	HEVGHLHQQEPWKWSKVRE	[281,285]	HEVGH	206976683
YP_002532570.1	9e-92	341	NA	5.6e-09	29.7	YP_002532570.1	301	3.8e-87	271.3	yes		Bacillus cereus Q1	Wall-associated protein precursor	HEIAHGYQAGFDNQGIFTGE	[264,268]	HEIAH	222098512
ZP_04245415.1	4e-83	312	1.1e-05	6e-09	29.6	ZP_04245415.1	307	8e-89	277.4	yes	1	Bacillus cereus Rock1-3	S-layer domain protein	HEIAHGYQAGFDNQGIFTGE	[264,268]	HEIAH	229116021
ZP_04111067.1	5e-93	345	NA	5.8e-09	29.6	ZP_04111067.1	307	7.5e-89	277.4	yes	1	Bacillus thuringiensis serovar monterrey BGSC 4AJ1	hypothetical protein bthur0007_49140	HEVGHQHQQDTWLWDGLGE	[281,285]	HEVGH	228948790
NP_834723.1	1e-85	321	NA	6.3e-09	29.5	NP_834723.1	300	1.2e-86	270.5	yes	1	Bacillus cereus ATCC 14579	wall-associated protein precursor	HEVGHLHQQEPWKWSKVRE	[291,295]	HEVGH	30023092
YP_002369867.1	1e-91	340	NA	6.4e-09	29.5	YP_002369867.1	302	2.8e-87	272.5	yes	1	Bacillus cereus B4264	wall-associated protein	HEIAHGYQAGFDNQGIFTGE	[255,259]	HEIAH	218232772
ZP_04228026.1	3e-83	313	1.1e-05	6.2e-09	29.5	ZP_04228026.1	307	8.4e-89	277.5	yes	1	Bacillus cereus Rock3-29	S-layer domain protein	HEIAHGYQAGFDNQGIFTGE	[264,268]	HEIAH	229097059
ZP_04117334.1	6e-91	338	NA	6.4e-09	29.5	ZP_04117334.1	300	1.1e-86	270.5	yes	1	Bacillus thuringiensis serovar kurstaki str. T03a001	hypothetical protein bthur0006_46840	HEVGHLHQQAPWFWSGVGE	[291,295]	HEVGH	228955326
ZP_04200658.1	5e-83	312	NA	6.3e-09	29.5	ZP_04200658.1	305	3.4e-88	275.5	yes		Bacillus cereus AH603	S-layer domain protein	HEVGHLHQQEPWKWSKVRE	[288,292]	HEVGH	229065404
ZP_04259276.1	2e-90	337	NA	6.7e-09	29.4	ZP_04259276.1	301	3.9e-87	271.6	yes	1	Bacillus cereus BDRD-Cer4	hypothetical protein bcere0015_47530	HEVGHQHQQETWLWDGLGE	[281,285]	HEVGH	229130317
ZP_04130357.1	4e-81	306	NA	6.5e-09	29.4	ZP_04130357.1	308	3.6e-89	278.6	yes		Bacillus thuringiensis serovar sotto str. T040	hypothetical protein bthur0004_62240	HEIAHGYQAGFDNQGIFTGE	[264,268]	HEIAH	228969551
ZP_04233797.1	8e-81	305	NA	7.1e-09	29.3	ZP_04233797.1	307	7.5e-89	277.7	yes	1	Bacillus cereus Rock3-28	S-layer domain protein	HEVGHQHQQDTWLWDGLGE	[281,285]	HEVGH	229103110
YP_002447016.1	6e-82	308	NA	7.3e-09	29.3	YP_002447016.1	311	5.9e-90	281.7	yes		Bacillus cereus G9842	S-layer domain protein	HEIGHGYQMSFRNDRYFWNGE	[247,251]	HEIGH	218898605
ZP_04168944.1	4e-83	312	5.9e-06	7e-09	29.3	ZP_04168944.1	308	4.5e-89	278.7	yes		Bacillus mycoides DSM 2048	S-layer domain protein	HEIAHGYQAGFDNQGIFTGE	[264,268]	HEIAH	229011762
ZP_04068100.1	1e-81	307	NA	6.9e-09	29.3	ZP_04068100.1	311	5.9e-90	281.7	yes		Bacillus thuringiensis IBL 4222	S-layer domain protein	HELGHQRQITRTWSWRAMTEVTVNIYSLANLRE	[500,504]	HELGH	228903993
ZP_03106796.1	1e-89	334	NA	7.5e-09	29.2	ZP_03106796.1	294	6e-85	264.8	yes	1	Bacillus cereus NVH0597-99	wall-associated protein	HEAGHARQQYPWTWNDLRGMGE	[276,280]	HEAGH	196039491
ZP_04325889.1	2e-93	347	NA	7.4e-09	29.2	ZP_04325889.1	310	7.6e-90	280.8	yes		Bacillus cereus m1293	hypothetical protein bcere0001_47200	HEIAHGYQAGFDNQGIFTGE	[264,268]	HEIAH	229199209
YP_002454093.1	4e-93	346	NA	8.2e-09	29.1	YP_002454093.1	306	1e-88	276.9	yes	1	Bacillus cereus AH820	wall-associated protein	HEVGHLHQQEPWKWSKVRE	[291,295]	HEVGH	218906259
ZP_03100686.1	2e-92	343	NA	8.2e-09	29.1	ZP_03100686.1	303	1.4e-87	273.9	yes	1	Bacillus cereus W	wall-associated protein	HEIAHGYQAGFDNQGIFTGE	[252,256]	HEIAH	196033273
ZP_04099141.1	5e-93	345	NA	8.2e-09	29.1	ZP_04099141.1	306	1.3e-88	276.9	yes	1	Bacillus thuringiensis serovar andalousiensis BGSC 4AW1	hypothetical protein bthur0009_47800	HEAGHLRQQSPWKFYNMTEVQNNIYSLSVE	[296,300]	HEAGH	228936343
ZP_04087543.1	5e-81	305	NA	8.4e-09	29.1	ZP_04087543.1	305	2.9e-88	275.9	yes	1	Bacillus thuringiensis serovar huazhongensis BGSC 4BD1	S-layer domain protein	HEAGHLRQQSPWKFYNMTEVQNNIYSLSVE	[296,300]	HEAGH	228924290
ZP_04093100.1	6e-93	345	NA	8.2e-09	29.1	ZP_04093100.1	306	1e-88	276.9	yes	1	Bacillus thuringiensis serovar pondicheriensis BGSC 4BA1	hypothetical protein bthur0010_47720	HEVGHLHQQEPWKWSKVRE	[291,295]	HEVGH	228930090
ZP_04205749.1	1e-90	337	NA	8.7e-09	29	ZP_04205749.1	294	5.5e-85	265	yes	1	Bacillus cereus F65185	hypothetical protein bcere0025_47080	HEIAHGYQAGFDNQGIFTGE	[275,279]	HEIAH	229072547
ZP_04214770.1	9e-92	341	NA	9.8e-09	28.9	ZP_04214770.1	300	1.1e-86	271.1	yes	1	Bacillus cereus Rock4-2	hypothetical protein bcere0023_49240	HEAGHLRQQSPWKFYNMTEVQNNIYSLSVE	[296,300]	HEAGH	229082307
ZP_04253785.1	5e-93	345	NA	1.1e-08	28.7	ZP_04253785.1	305	2.5e-88	276.3	yes	1	Bacillus cereus 95/8201	hypothetical protein bcere0016_48840	HEVGHLHQQEPWKWSKVRE	[288,292]	HEVGH	229124600
YP_039079.1	2e-93	347	NA	1.8e-08	28	YP_039079.1	312	2.1e-90	284	yes	1	Bacillus thuringiensis serovar konkukian str. 97-27	wall-associated protein	HEIGHGYQMSFRNDRYFWNGE	[247,251]	HEIGH	49481519
ZP_00739797.1	9e-81	305	0.021	2e-08	27.9	ZP_00739797.1	304	5.4e-88	276.1	yes		Bacillus thuringiensis serovar israelensis ATCC 35	Wall-associated protein precursor	HEIAHGYQAGFDNQGIFTGE	[264,268]	HEIAH	75759716
ZP_04140386.1	2e-80	304	6.2e-06	2e-08	27.8	ZP_04140386.1	306	1.5e-88	278.2	yes	1	Bacillus thuringiensis Bt407	S-layer domain protein	HEVGHLHQQAPWFWSGIGE	[292,296]	HEVGH	228980070
ZP_04103158.1	2e-80	304	6.2e-06	2e-08	27.8	ZP_04103158.1	306	1.5e-88	278.2	yes	1	Bacillus thuringiensis serovar berliner ATCC 10792	S-layer domain protein	HEVGHIHQQVPWLSEGMGE	[290,294]	HEVGH	228940592
ZP_04134096.1	2e-80	304	6.2e-06	2e-08	27.8	ZP_04134096.1	306	1.5e-88	278.2	yes	1	Bacillus thuringiensis serovar thuringiensis str. T01001	S-layer domain protein	HEIAHGYQAGFDNQGIFTGE	[264,268]	HEIAH	228973512
ZP_04291969.1	2e-83	313	NA	3e-08	27.2	ZP_04291969.1	292	3.3e-84	264.8	yes		Bacillus cereus R309803	hypothetical protein bcere0009_47940	HEAGHLRQQSPWKFYNMTEVQNNIYSLSVE	[296,300]	HEAGH	229164032
ZP_04265361.1	8e-77	292	NA	3.4e-08	27.1	ZP_04265361.1	301	3.6e-87	273.9	yes		Bacillus cereus BDRD-ST196	Fibronectin type III domain protein	HEAGHTRQQNPWTWASNGMTE	[296,300]	HEAGH	229136704
ZP_04129181.1	2e-93	347	NA	5.9e-08	26.3	ZP_04129181.1	307	5e-89	280.7	yes		Bacillus thuringiensis serovar sotto str. T040	hypothetical protein bthur0004_49610	HEVGHQHQQDTWLWDGLGE	[272,276]	HEVGH	228968180
ZP_04112386.1	1e-80	304	NA	7.5e-08	25.9	ZP_04112386.1	293	1.4e-84	267.1	yes	1	Bacillus thuringiensis serovar monterrey BGSC 4AJ1	S-layer domain protein	HEVGHIHQQVPWLSEGMGE	[290,294]	HEVGH	228950208
YP_002752424.1	1e-91	340	NA	7.9e-08	25.9	YP_002752424.1	297	7.9e-86	271.1	yes		Bacillus cereus 03BB102	wall-associated protein	HEIAHGYQAGFDNQGIFTGE	[275,279]	HEIAH	225867046
ZP_03114768.1	1e-91	340	NA	7.9e-08	25.9	ZP_03114768.1	297	7.9e-86	271.1	yes		Bacillus cereus 03BB108	wall-associated protein	HEAGHARQQHPWTWNDLRGMGE	[276,280]	HEAGH	196047559
ZP_04314451.1	2e-91	340	NA	7.8e-08	25.9	ZP_04314451.1	297	7.8e-86	271.1	yes		Bacillus cereus BGSC 6E1	hypothetical protein bcere0004_48420	HEAGHLRQQSPWKFYNMTEVQNNIYSLSVE	[276,280]	HEAGH	229187307
YP_897294.1	1e-91	340	NA	7.9e-08	25.9	YP_897294.1	297	7.9e-86	271.1	yes		Bacillus thuringiensis str. Al Hakam	wall-associated protein	HEAGHKRQQQPWTWDDRRGTWE	[299,303]	HEAGH	118480143
ZP_04200907.1	7e-81	305	1e-05	1.4e-07	25.1	ZP_04200907.1	288	5.6e-83	262.9	yes		Bacillus cereus AH603	S-layer domain protein	HEAGHLRQQSPWKFYNMTEVQNNIYSLSVE	[296,300]	HEAGH	229065680
ZP_04122922.1	4e-94	349	NA	1.4e-07	25	ZP_04122922.1	306	1.6e-88	281	yes	1	Bacillus thuringiensis serovar pakistani str. T13001	hypothetical protein bthur0005_47520	HEVGHLHQQEPWKWSKVRE	[291,295]	HEVGH	228961305
ZP_04160383.1	2e-76	290	NA	1.4e-07	25	ZP_04160383.1	303	1e-87	278	yes		Bacillus mycoides Rock3-17	Fibronectin type III domain protein	HEAGHARQQYPWTWNDLRGMGE	[272,276]	HEAGH	229000913
YP_001642566.1	9e-79	298	NA	2e-07	24.5	YP_001642566.1	296	2.2e-85	271.5	yes		Bacillus weihenstephanensis KBAB4	fibronectin type III domain-containing protein	HEIAHGYQAGFDNQGIFTGE	[266,270]	HEIAH	163943336
ZP_04264662.1	3e-87	326	NA	2.1e-07	24.4	ZP_04264662.1	305	2.2e-88	280.6	yes		Bacillus cereus BDRD-ST196	hypothetical protein bcere0014_47770	HEVGHLHQQEPWKWSKVRE	[291,295]	HEVGH	229135898
ZP_00738692.1	2e-79	300	0.029	2.2e-07	24.4	ZP_00738692.1	292	2.7e-84	267.6	yes		Bacillus thuringiensis serovar israelensis ATCC 35	Wall-associated protein precursor	HEIAHGYQAGFDNQGIFTGE	[264,268]	HEIAH	75758573
YP_003122217.1	9e-75	285	NA	3.9e-07	23.6	YP_003122217.1	230	1.7e-65	206.4	yes		Chitinophaga pinensis DSM 2588	hypothetical protein Cpin_2532				256421564
ZP_04188665.1	3e-92	342	NA	4e-07	23.5	ZP_04188665.1	293	1.2e-84	269.5	yes	1	Bacillus cereus AH1271	hypothetical protein bcere0028_47380	HEIAHGYQAGFDNQGIFTGE	[275,279]	HEIAH	229032704
ZP_04200035.1	4e-92	342	NA	4.5e-07	23.4	ZP_04200035.1	302	3.2e-87	278.6	yes		Bacillus cereus AH603	hypothetical protein bcere0026_47920	HEAGHLRQQSPWKFYNMTEVQNNIYSLSVE	[296,300]	HEAGH	229062729
ZP_03100442.1	7e-87	325	NA	4.5e-07	23.3	ZP_03100442.1	298	3e-86	274.7	yes	1	Bacillus cereus W	wall-associated protein	HEVGHLHQQEPWKWSKVRE	[288,292]	HEVGH	196033029
ZP_04142094.1	8e-92	341	NA	4.8e-07	23.3	ZP_04142094.1	299	1.8e-86	275.7	yes	1	Bacillus thuringiensis Bt407	hypothetical protein bthur0002_49580	HEVGHLHQQAPWEWEDLGE	[291,295]	HEVGH	228981799
ZP_04104770.1	8e-92	341	NA	4.8e-07	23.3	ZP_04104770.1	299	1.8e-86	275.7	yes	1	Bacillus thuringiensis serovar berliner ATCC 10792	hypothetical protein bthur0008_48610	HEAGHARQQYPWTWNDLRGMGE	[272,276]	HEAGH	228942230
ZP_04135719.1	8e-92	341	NA	4.8e-07	23.3	ZP_04135719.1	299	1.8e-86	275.7	yes	1	Bacillus thuringiensis serovar thuringiensis str. T01001	hypothetical protein bthur0003_49080				228975160
ZP_04297480.1	6e-92	342	NA	5.3e-07	23.1	ZP_04297480.1	302	3.3e-87	278.9	yes		Bacillus cereus AH621	hypothetical protein bcere0007_47240	HEVGHQHQQDTWLWEGLGE	[281,285]	HEVGH	229169782
YP_001647664.1	2e-93	346	NA	9.4e-07	22.3	YP_001647664.1	302	2.4e-87	279.7	yes		Bacillus weihenstephanensis KBAB4	wall-associated protein precursor	HEVGHLHQQEPWKWSKVRE	[291,295]	HEVGH	163942780
XP_002377568.1	1e-58	231	NA	7.7e-06	19.3	XP_002377568.1	233	2.4e-66	213.7	yes	1	Aspergillus flavus NRRL3357	cell wall associated protein, putative	HELGHNQQRKVWEFPPHTTECTCNLWSVYVHE	[754,758]	HELGH	238492663
XP_001825930.1	2e-57	227	NA	9.2e-06	19	XP_001825930.1	230	2e-65	211	yes	1	Aspergillus oryzae RIB40	hypothetical protein	HELGHNQQRKVWEFPPHTTECTCNLWSVYVHE	[750,754]	HELGH	169782936
XP_001583210.1	2e-28	131	NA	2e-05	17.9	XP_001583210.1	60	9.7e-14	42.1	yes		Trichomonas vaginalis G3	F5/8 type C domain containing protein	HEIGHNQAANWLNVVGAGETANNVLALYTQE	[1334,1338]	HEIGH	154420390
ZP_03966994.1	3e-44	183	NA	4.1e-05	16.9	ZP_03966994.1	124	4.4e-33	107.1	yes		Sphingobacterium spiritivorum ATCC 33300	possible wall-associated protein	HEVGHAYDFNFVTNVPVLSE	[252,256]	HEVGH	227536945
ZP_04780830.1	3e-44	183	NA	4.1e-05	16.9	ZP_04780830.1	126	1e-33	109.1	yes		Sphingobacterium spiritivorum ATCC 33861	possible wall-associated protein	HEVGHNAAETPLTVPGATE	[1260,1264]	HEVGH	241893534
ZP_03208622.1	7e-50	202	NA	4.6e-05	16.7	ZP_03208622.1	260	1.8e-74	243.3	yes		Bacteroides plebeius DSM 17135	hypothetical protein BACPLE_02278	HEIGHGYQNDFTRGE	[267,271]	HEIGH	198276091
ZP_04617115.1	7e-72	275	NA	4.8e-05	16.6	ZP_04617115.1	272	3.5e-78	255.4	yes		Yersinia ruckeri ATCC 29473	hypothetical protein yruck0001_340	HEVGHVHQLQTYLSWGGLGE	[342,346]	HEVGH	238755783
ZP_01960238.1	1e-61	241	NA	7.6e-05	16	ZP_01960238.1	246	2.4e-70	230	yes		Bacteroides caccae ATCC 43185	hypothetical protein BACCAC_01850	HELGHNFDTGGRTIVEVTNNMMPLFFE	[756,760]	HELGH	153807570
ZP_05722171.1	4e-47	193	NA	0.00022	14.5	ZP_05722171.1	212	8.2e-60	197.5	yes		Vibrio mimicus VM603	conserved hypothetical protein	HEAGHNAAETPLTVPGATE	[1305,1309]	HEAGH	258627388
YP_003244705.1	4e-94	349	NA	0.00024	14.3	YP_003244705.1	320	1e-92	305.7	yes		Geobacillus sp. Y412MC10	hypothetical protein GYMC10_4678	HEIGHCYQHPFNWRSMSE	[458,462]	HEIGH	261408464
YP_001878116.1	1e-80	304	NA	0.00039	13.6	YP_001878116.1	271	5.9e-78	257.4	yes		Akkermansia muciniphila ATCC BAA-835	hypothetical protein Amuc_1514				187736004
ZP_04428328.1	2e-87	327	NA	0.00075	12.7	ZP_04428328.1	294	6.7e-85	281.3	yes		Planctomyces limnophilus DSM 3776	hypothetical protein PlimDRAFT_30570	HEAGHKRQQQPWTWDDRRGTWE	[299,303]	HEAGH	229539192
YP_001877521.1	1e-44	184	NA	0.00083	12.6	YP_001877521.1	142	1.2e-38	129.4	yes		Akkermansia muciniphila ATCC BAA-835	hypothetical protein Amuc_0908	HEVGHNAAETPLTVPGATE	[1308,1312]	HEVGH	187735409
ZP_04918705.1	9e-60	235	NA	0.0016	11.6	ZP_04918705.1	260	1.2e-74	248.4	yes		Vibrio cholerae V51	lipoprotein, putative	HEVGHQMDIMGRDWPE	[334,338]	HEVGH	254225091
ZP_05715067.1	3e-59	233	NA	0.0017	11.5	ZP_05715067.1	259	2.9e-74	247.5	yes		Vibrio mimicus VM573	Accessory colonization factor AcfD	HELGHNFDTGGRTIVEVTNNMMPLFFE	[756,760]	HELGH	258620027
YP_001675698.1	4e-58	230	NA	0.0019	11.3	YP_001675698.1	269	1.9e-77	257.7	yes		Shewanella halifaxensis HAW-EB4	hypothetical protein Shal_3494	HEIGHCNQTRPGLKWLGTTEVTNNIMSE	[654,658]	HEIGH	167625404
ZP_05718328.1	4e-61	240	NA	0.003	10.7	ZP_05718328.1	259	2.6e-74	248.3	yes		Vibrio mimicus VM573	accessory colonization factor acfD	HEIGHEINEGAYAIAE	[1140,1144]	HEIGH	258623323
ZP_01959886.1	2e-53	213	NA	0.005	10	ZP_01959886.1	255	6.1e-73	245	yes		Bacteroides caccae ATCC 43185	hypothetical protein BACCAC_01496	HEFGHIFNTQYVVDGEVTNNLYAQE	[995,999]	HEFGH	153807218
ZP_03133174.1	2e-96	356	NA	0.0048	10	ZP_03133174.1	306	1.2e-88	296	yes		Chthoniobacter flavus Ellin428	conserved hypothetical protein	HEVGHLHQQEPWKWSKVRE	[291,295]	HEVGH	196234345
ZP_01954520.1	8e-59	231	NA	0.0058	9.8	ZP_01954520.1	265	3.8e-76	255.2	yes		Vibrio cholerae MAK 757	accessory colonization factor AcfD	HEIGHCNQTRPGVLWGGNTEVTNNIMSE	[647,651]	HEIGH	153224613
YP_003182171.1	2e-35	154	NA	0.011	8.8	YP_003182171.1	43	2e-08	34.2	yes		Eggerthella lenta DSM 2243	coagulation factor 5/8 type domain protein	HEIAHGYQGGFIDDKYFSTRE	[245,249]	HEIAH	257791565
NP_666286.1	4e-90	335	NA	0.015	8.4	NP_666286.1	304	5.3e-88	295.6	yes		Mus musculus	hypothetical protein LOC232748	HEVGHLHQQEPWKWSKVRE	[288,292]	HEVGH	22122713
XP_001092570.1	2e-92	343	NA	0.059	6.4	XP_001092570.1	309	1.3e-89	302.6	yes		Macaca mulatta	PREDICTED: hypothetical protein	HEIAHGYQAGFDNQGIFTGE	[264,268]	HEIAH	109068737
XP_519453.2	1e-92	344	NA	0.11	5.5	XP_519453.2	307	6.9e-89	301.5	yes		Pan troglodytes	PREDICTED: hypothetical protein	HEIAHGYQAGFDNQGIFTGE	[264,268]	HEIAH	114616552
NP_981933.1	5e-87	325	NA	0.53	3.3	NP_981933.1	286	1.5e-82	282.7	yes		Mus musculus	experimental autoimmune prostatitis antigen 2	HEVGHLHQQAPWFWSGIGE	[292,296]	HEVGH	42794267

## Sheet: Taxa counts PF13402
			Taxa PF13402	Counts PF13402	Taxonomy
			Akkermansia muciniphila ATCC BAA-835	4	Verrucomicrobia
Count of Taxa			Aspergillus flavus NRRL3357	1	Eukaryota - Fungi
Row Labels	Total		Aspergillus oryzae RIB40	1	Eukaryota - Fungi
Akkermansia muciniphila ATCC BAA-835	4		Bacillus anthracis str. 'Ames Ancestor'	1	Firmicutes
Aspergillus flavus NRRL3357	1		Bacillus anthracis str. A1055	1	Firmicutes
Aspergillus oryzae RIB40	1		Bacillus anthracis str. A2012	1	Firmicutes
Bacillus anthracis str. 'Ames Ancestor'	1		Bacillus anthracis str. Ames	1	Firmicutes
Bacillus anthracis str. A1055	1		Bacillus anthracis str. Australia 94	1	Firmicutes
Bacillus anthracis str. A2012	1		Bacillus anthracis str. CDC 684	1	Firmicutes
Bacillus anthracis str. Ames	1		Bacillus anthracis str. CNEVA-9066	1	Firmicutes
Bacillus anthracis str. Australia 94	1		Bacillus anthracis str. Kruger B	1	Firmicutes
Bacillus anthracis str. CDC 684	1		Bacillus anthracis str. Sterne	1	Firmicutes
Bacillus anthracis str. CNEVA-9066	1		Bacillus anthracis str. Vollum	1	Firmicutes
Bacillus anthracis str. Kruger B	1		Bacillus anthracis str. Western North Ameri	1	Firmicutes
Bacillus anthracis str. Sterne	1		Bacillus cereus 03BB102	1	Firmicutes
Bacillus anthracis str. Vollum	1		Bacillus cereus 03BB108	1	Firmicutes
Bacillus anthracis str. Western North Ameri	1		Bacillus cereus 172560W	2	Firmicutes
Bacillus cereus 03BB102	1		Bacillus cereus 95/8201	2	Firmicutes
Bacillus cereus 03BB108	1		Bacillus cereus AH1134	3	Firmicutes
Bacillus cereus 172560W	2		Bacillus cereus AH1271	1	Firmicutes
Bacillus cereus 95/8201	2		Bacillus cereus AH187	1	Firmicutes
Bacillus cereus AH1134	3		Bacillus cereus AH603	3	Firmicutes
Bacillus cereus AH1271	1		Bacillus cereus AH621	3	Firmicutes
Bacillus cereus AH187	1		Bacillus cereus AH676	2	Firmicutes
Bacillus cereus AH603	3		Bacillus cereus AH820	2	Firmicutes
Bacillus cereus AH621	3		Bacillus cereus ATCC 10876	3	Firmicutes
Bacillus cereus AH676	2		Bacillus cereus ATCC 10987	1	Firmicutes
Bacillus cereus AH820	2		Bacillus cereus ATCC 14579	1	Firmicutes
Bacillus cereus ATCC 10876	3		Bacillus cereus ATCC 4342	1	Firmicutes
Bacillus cereus ATCC 10987	1		Bacillus cereus B4264	2	Firmicutes
Bacillus cereus ATCC 14579	1		Bacillus cereus BDRD-Cer4	1	Firmicutes
Bacillus cereus ATCC 4342	1		Bacillus cereus BDRD-ST196	3	Firmicutes
Bacillus cereus B4264	2		Bacillus cereus BDRD-ST24	1	Firmicutes
Bacillus cereus BDRD-Cer4	1		Bacillus cereus BDRD-ST26	1	Firmicutes
Bacillus cereus BDRD-ST196	3		Bacillus cereus BGSC 6E1	1	Firmicutes
Bacillus cereus BDRD-ST24	1		Bacillus cereus E33L	1	Firmicutes
Bacillus cereus BDRD-ST26	1		Bacillus cereus F65185	2	Firmicutes
Bacillus cereus BGSC 6E1	1		Bacillus cereus G9241	1	Firmicutes
Bacillus cereus E33L	1		Bacillus cereus G9842	2	Firmicutes
Bacillus cereus F65185	2		Bacillus cereus H3081.97	1	Firmicutes
Bacillus cereus G9241	1		Bacillus cereus m1293	1	Firmicutes
Bacillus cereus G9842	2		Bacillus cereus m1550	2	Firmicutes
Bacillus cereus H3081.97	1		Bacillus cereus MM3	2	Firmicutes
Bacillus cereus m1293	1		Bacillus cereus NVH0597-99	1	Firmicutes
Bacillus cereus m1550	2		Bacillus cereus Q1	1	Firmicutes
Bacillus cereus MM3	2		Bacillus cereus R309803	1	Firmicutes
Bacillus cereus NVH0597-99	1		Bacillus cereus Rock1-15	2	Firmicutes
Bacillus cereus Q1	1		Bacillus cereus Rock1-3	4	Firmicutes
Bacillus cereus R309803	1		Bacillus cereus Rock3-28	3	Firmicutes
Bacillus cereus Rock1-15	2		Bacillus cereus Rock3-29	3	Firmicutes
Bacillus cereus Rock1-3	4		Bacillus cereus Rock3-42	1	Firmicutes
Bacillus cereus Rock3-28	3		Bacillus cereus Rock4-2	2	Firmicutes
Bacillus cereus Rock3-29	3		Bacillus cereus subsp. cytotoxis NVH 391-98	1	Firmicutes
Bacillus cereus Rock3-42	1		Bacillus cereus W	2	Firmicutes
Bacillus cereus Rock4-2	2		Bacillus mycoides DSM 2048	2	Firmicutes
Bacillus cereus subsp. cytotoxis NVH 391-98	1		Bacillus mycoides Rock3-17	1	Firmicutes
Bacillus cereus W	2		Bacillus pseudomycoides DSM 12442	2	Firmicutes
Bacillus mycoides DSM 2048	2		Bacillus thuringiensis Bt407	3	Firmicutes
Bacillus mycoides Rock3-17	1		Bacillus thuringiensis IBL 200	2	Firmicutes
Bacillus pseudomycoides DSM 12442	2		Bacillus thuringiensis IBL 4222	2	Firmicutes
Bacillus thuringiensis Bt407	3		Bacillus thuringiensis serovar andalousiensis BGSC 4AW1	1	Firmicutes
Bacillus thuringiensis IBL 200	2		Bacillus thuringiensis serovar berliner ATCC 10792	4	Firmicutes
Bacillus thuringiensis IBL 4222	2		Bacillus thuringiensis serovar huazhongensis BGSC 4BD1	2	Firmicutes
Bacillus thuringiensis serovar andalousiensis BGSC 4AW1	1		Bacillus thuringiensis serovar israelensis ATCC 35	3	Firmicutes
Bacillus thuringiensis serovar berliner ATCC 10792	4		Bacillus thuringiensis serovar konkukian str. 97-27	1	Firmicutes
Bacillus thuringiensis serovar huazhongensis BGSC 4BD1	2		Bacillus thuringiensis serovar kurstaki str. T03a001	2	Firmicutes
Bacillus thuringiensis serovar israelensis ATCC 35	3		Bacillus thuringiensis serovar monterrey BGSC 4AJ1	3	Firmicutes
Bacillus thuringiensis serovar konkukian str. 97-27	1		Bacillus thuringiensis serovar pakistani str. T13001	1	Firmicutes
Bacillus thuringiensis serovar kurstaki str. T03a001	2		Bacillus thuringiensis serovar pondicheriensis BGSC 4BA1	2	Firmicutes
Bacillus thuringiensis serovar monterrey BGSC 4AJ1	3		Bacillus thuringiensis serovar pulsiensis BGSC 4CC1	1	Firmicutes
Bacillus thuringiensis serovar pakistani str. T13001	1		Bacillus thuringiensis serovar sotto str. T040	2	Firmicutes
Bacillus thuringiensis serovar pondicheriensis BGSC 4BA1	2		Bacillus thuringiensis serovar thuringiensis str. T01001	4	Firmicutes
Bacillus thuringiensis serovar pulsiensis BGSC 4CC1	1		Bacillus thuringiensis serovar tochigiensis BGSC 4Y1	1	Firmicutes
Bacillus thuringiensis serovar sotto str. T040	2		Bacillus thuringiensis str. Al Hakam	1	Firmicutes
Bacillus thuringiensis serovar thuringiensis str. T01001	4		Bacillus weihenstephanensis KBAB4	3	Firmicutes
Bacillus thuringiensis serovar tochigiensis BGSC 4Y1	1		Bacteroides caccae ATCC 43185	16	Bacteroidetes
Bacillus thuringiensis str. Al Hakam	1		Bacteroides capillosus ATCC 29799	1	Bacteroidetes
Bacillus weihenstephanensis KBAB4	3		Bacteroides coprophilus DSM 18228	1	Bacteroidetes
Bacteroides caccae ATCC 43185	16		Bacteroides finegoldii DSM 17565	1	Bacteroidetes
Bacteroides capillosus ATCC 29799	1		Bacteroides fragilis 3_1_12	1	Bacteroidetes
Bacteroides coprophilus DSM 18228	1		Bacteroides fragilis NCTC 9343	1	Bacteroidetes
Bacteroides finegoldii DSM 17565	1		Bacteroides fragilis YCH46	1	Bacteroidetes
Bacteroides fragilis 3_1_12	1		Bacteroides plebeius DSM 17135	2	Bacteroidetes
Bacteroides fragilis NCTC 9343	1		Bacteroides sp. 1_1_6	4	Bacteroidetes
Bacteroides fragilis YCH46	1		Bacteroides sp. 2_1_16	1	Bacteroidetes
Bacteroides plebeius DSM 17135	2		Bacteroides sp. 3_2_5	1	Bacteroidetes
Bacteroides sp. 1_1_6	4		Bacteroides sp. D2	1	Bacteroidetes
Bacteroides sp. 2_1_16	1		Bacteroides thetaiotaomicron VPI-5482	4	Bacteroidetes
Bacteroides sp. 3_2_5	1		Bacteroides vulgatus ATCC 8482	1	Bacteroidetes
Bacteroides sp. D2	1		Bos taurus	2	Eukaryota - Metazoa
Bacteroides thetaiotaomicron VPI-5482	4		Brachybacterium faecium DSM 4810	1	Actinobacteria
Bacteroides vulgatus ATCC 8482	1		Branchiostoma floridae	2	Eukaryota - Metazoa
Bos taurus	2		Canis familiaris	3	Eukaryota - Metazoa
Brachybacterium faecium DSM 4810	1		Chitinophaga pinensis DSM 2588	1	Bacteroidetes
Branchiostoma floridae	2		Chthoniobacter flavus Ellin428	1	Verrucomicrobia
Canis familiaris	3		Clostridium bartlettii DSM 16795	2	Firmicutes
Chitinophaga pinensis DSM 2588	1		Clostridium botulinum E1 str. 'BoNT E Beluga'	1	Firmicutes
Chthoniobacter flavus Ellin428	1		Clostridium botulinum E3 str. Alaska E43	1	Firmicutes
Clostridium bartlettii DSM 16795	2		Clostridium difficile QCD-32g58	1	Firmicutes
Clostridium botulinum E1 str. 'BoNT E Beluga'	1		Clostridium hathewayi DSM 13479	1	Firmicutes
Clostridium botulinum E3 str. Alaska E43	1		Clostridium hiranonis DSM 13275	1	Firmicutes
Clostridium difficile QCD-32g58	1		Clostridium perfringens ATCC 13124	2	Firmicutes
Clostridium hathewayi DSM 13479	1		Clostridium perfringens B str. ATCC 3626	2	Firmicutes
Clostridium hiranonis DSM 13275	1		Clostridium perfringens C str. JGS1495	1	Firmicutes
Clostridium perfringens ATCC 13124	2		Clostridium perfringens CPE str. F4969	2	Firmicutes
Clostridium perfringens B str. ATCC 3626	2		Clostridium perfringens D str. JGS1721	4	Firmicutes
Clostridium perfringens C str. JGS1495	1		Clostridium perfringens E str. JGS1987	1	Firmicutes
Clostridium perfringens CPE str. F4969	2		Clostridium perfringens NCTC 8239	2	Firmicutes
Clostridium perfringens D str. JGS1721	4		Clostridium perfringens SM101	1	Firmicutes
Clostridium perfringens E str. JGS1987	1		Clostridium perfringens str. 13	1	Firmicutes
Clostridium perfringens NCTC 8239	2		Clostridium ramosum DSM 1402	1	Firmicutes
Clostridium perfringens SM101	1		Clostridium sp. 7_2_43FAA	1	Firmicutes
Clostridium perfringens str. 13	1		Cryptosporidium muris RN66	1	Eukaryota - Apicomplexa
Clostridium ramosum DSM 1402	1		Cryptosporidium parvum Iowa II	1	Eukaryota - Apicomplexa
Clostridium sp. 7_2_43FAA	1		Danio rerio	4	Eukaryota - Metazoa
Cryptosporidium muris RN66	1		Eggerthella lenta DSM 2243	1	Actinobacteria
Cryptosporidium parvum Iowa II	1		Entamoeba dispar SAW760	1	Eukaryota - Amoebozoa
Danio rerio	4		Entamoeba histolytica HM-1:IMSS	1	Eukaryota - Amoebozoa
Eggerthella lenta DSM 2243	1		Equus caballus	2	Eukaryota - Metazoa
Entamoeba dispar SAW760	1		Escherichia albertii TW07627	1	Proteobacteria
Entamoeba histolytica HM-1:IMSS	1		Escherichia coli 101-1	1	Proteobacteria
Equus caballus	2		Escherichia coli 536	1	Proteobacteria
Escherichia albertii TW07627	1		Escherichia coli 53638	1	Proteobacteria
Escherichia coli 101-1	1		Escherichia coli 55989	1	Proteobacteria
Escherichia coli 536	1		Escherichia coli 83972	1	Proteobacteria
Escherichia coli 53638	1		Escherichia coli APEC O1	1	Proteobacteria
Escherichia coli 55989	1		Escherichia coli B str. REL606	1	Proteobacteria
Escherichia coli 83972	1		Escherichia coli B7A	1	Proteobacteria
Escherichia coli APEC O1	1		Escherichia coli BL21(DE3)	1	Proteobacteria
Escherichia coli B str. REL606	1		Escherichia coli BW2952	1	Proteobacteria
Escherichia coli B7A	1		Escherichia coli E110019	1	Proteobacteria
Escherichia coli BL21(DE3)	1		Escherichia coli E22	1	Proteobacteria
Escherichia coli BW2952	1		Escherichia coli E24377A	1	Proteobacteria
Escherichia coli E110019	1		Escherichia coli ED1a	1	Proteobacteria
Escherichia coli E22	1		Escherichia coli F11	1	Proteobacteria
Escherichia coli E24377A	1		Escherichia coli HS	1	Proteobacteria
Escherichia coli ED1a	1		Escherichia coli IAI1	1	Proteobacteria
Escherichia coli F11	1		Escherichia coli IAI39	1	Proteobacteria
Escherichia coli HS	1		Escherichia coli O111:H- str. 11128	1	Proteobacteria
Escherichia coli IAI1	1		Escherichia coli O127:H6 str. E2348/69	1	Proteobacteria
Escherichia coli IAI39	1		Escherichia coli S88	1	Proteobacteria
Escherichia coli O111:H- str. 11128	1		Escherichia coli SE11	1	Proteobacteria
Escherichia coli O127:H6 str. E2348/69	1		Escherichia coli SMS-3-5	1	Proteobacteria
Escherichia coli S88	1		Escherichia coli str. K-12 substr. MG1655	1	Proteobacteria
Escherichia coli SE11	1		Escherichia coli str. K-12 substr. W3110	1	Proteobacteria
Escherichia coli SMS-3-5	1		Escherichia coli UMN026	1	Proteobacteria
Escherichia coli str. K-12 substr. MG1655	1		Escherichia coli UTI89	1	Proteobacteria
Escherichia coli str. K-12 substr. W3110	1		Escherichia fergusonii ATCC 35469	1	Proteobacteria
Escherichia coli UMN026	1		Escherichia sp. 1_1_43	1	Proteobacteria
Escherichia coli UTI89	1		Escherichia sp. 3_2_53FAA	1	Proteobacteria
Escherichia fergusonii ATCC 35469	1		Escherichia sp. 4_1_40B	1	Proteobacteria
Escherichia sp. 1_1_43	1		Eubacterium dolichum DSM 3991	1	Firmicutes
Escherichia sp. 3_2_53FAA	1		Geobacillus sp. Y412MC10	2	Firmicutes
Escherichia sp. 4_1_40B	1		Grimontia hollisae CIP 101886	2	Proteobacteria
Eubacterium dolichum DSM 3991	1		Hahella chejuensis KCTC 2396	1	Proteobacteria
Geobacillus sp. Y412MC10	2		Homo sapiens	5	Eukaryota - Metazoa
Grimontia hollisae CIP 101886	2		Listeria grayi DSM 20601	1	Firmicutes
Hahella chejuensis KCTC 2396	1		Macaca mulatta	1	Eukaryota - Metazoa
Homo sapiens	5		Mollicutes bacterium D7	1	Firmicutes
Listeria grayi DSM 20601	1		Monosiga brevicollis MX1	1	Eukaryota - Choanoflagellida
Macaca mulatta	1		Mus musculus	3	Eukaryota - Metazoa
Mollicutes bacterium D7	1		Mycoplasma penetrans HF-2	3	Tenericutes
Monosiga brevicollis MX1	1		Ornithorhynchus anatinus	3	Eukaryota - Metazoa
Mus musculus	3		Paenibacillus larvae subsp. larvae BRL-230010	1	Firmicutes
Mycoplasma penetrans HF-2	3		Pan troglodytes	2	Eukaryota - Metazoa
Ornithorhynchus anatinus	3		Pantoea sp. At-9b	1	Proteobacteria
Paenibacillus larvae subsp. larvae BRL-230010	1		Photobacterium damselae subsp. damsela	1	Proteobacteria
Pan troglodytes	2		Photorhabdus asymbiotica	1	Proteobacteria
Pantoea sp. At-9b	1		Planctomyces limnophilus DSM 3776	1	Planctomycetes
Photobacterium damselae subsp. damsela	1		Pongo abelii	1	Eukaryota - Metazoa
Photorhabdus asymbiotica	1		Prevotella melaninogenica ATCC 25845	1	Bacteroidetes
Planctomyces limnophilus DSM 3776	1		Pseudomonas aeruginosa 2192	1	Proteobacteria
Pongo abelii	1		Pseudomonas aeruginosa C3719	1	Proteobacteria
Prevotella melaninogenica ATCC 25845	1		Pseudomonas aeruginosa LESB58	1	Proteobacteria
Pseudomonas aeruginosa 2192	1		Pseudomonas aeruginosa PA7	1	Proteobacteria
Pseudomonas aeruginosa C3719	1		Pseudomonas aeruginosa PACS2	1	Proteobacteria
Pseudomonas aeruginosa LESB58	1		Pseudomonas aeruginosa PAO1	1	Proteobacteria
Pseudomonas aeruginosa PA7	1		Pseudomonas aeruginosa UCBPP-PA14	1	Proteobacteria
Pseudomonas aeruginosa PACS2	1		Pseudomonas syringae pv. oryzae str. 1_6	1	Proteobacteria
Pseudomonas aeruginosa PAO1	1		Pseudomonas syringae pv. syringae B728a	2	Proteobacteria
Pseudomonas aeruginosa UCBPP-PA14	1		Pseudomonas syringae pv. tomato str. DC3000	2	Proteobacteria
Pseudomonas syringae pv. oryzae str. 1_6	1		Pseudomonas syringae pv. tomato T1	1	Proteobacteria
Pseudomonas syringae pv. syringae B728a	2		Rattus norvegicus	5	Eukaryota - Metazoa
Pseudomonas syringae pv. tomato str. DC3000	2		Salmonella enterica subsp. arizonae serovar 62:z4,z23:-- str. RSK2980	1	Proteobacteria
Pseudomonas syringae pv. tomato T1	1		Shewanella amazonensis SB2B	1	Proteobacteria
Rattus norvegicus	5		Shewanella baltica OS155	1	Proteobacteria
Salmonella enterica subsp. arizonae serovar 62:z4,z23:-- str. RSK2980	1		Shewanella baltica OS185	1	Proteobacteria
Shewanella amazonensis SB2B	1		Shewanella baltica OS195	1	Proteobacteria
Shewanella baltica OS155	1		Shewanella baltica OS223	1	Proteobacteria
Shewanella baltica OS185	1		Shewanella halifaxensis HAW-EB4	2	Proteobacteria
Shewanella baltica OS195	1		Shewanella loihica PV-4	1	Proteobacteria
Shewanella baltica OS223	1		Shewanella oneidensis MR-1	1	Proteobacteria
Shewanella halifaxensis HAW-EB4	2		Shewanella pealeana ATCC 700345	2	Proteobacteria
Shewanella loihica PV-4	1		Shewanella sp. ANA-3	1	Proteobacteria
Shewanella oneidensis MR-1	1		Shewanella sp. MR-4	1	Proteobacteria
Shewanella pealeana ATCC 700345	2		Shewanella sp. MR-7	1	Proteobacteria
Shewanella sp. ANA-3	1		Shewanella woodyi ATCC 51908	1	Proteobacteria
Shewanella sp. MR-4	1		Shigella sp. D9	1	Proteobacteria
Shewanella sp. MR-7	1		Sphingobacterium spiritivorum ATCC 33300	6	Bacteroidetes
Shewanella woodyi ATCC 51908	1		Sphingobacterium spiritivorum ATCC 33861	6	Bacteroidetes
Shigella sp. D9	1		Subdoligranulum variabile DSM 15176	1	Firmicutes
Sphingobacterium spiritivorum ATCC 33300	6		Taeniopygia guttata	2	Eukaryota - Metazoa
Sphingobacterium spiritivorum ATCC 33861	6		Trichomonas vaginalis G3	25	Eukaryota - Parabasalia
Subdoligranulum variabile DSM 15176	1		Verrucomicrobium spinosum DSM 4136	1	Verrucomicrobia
Taeniopygia guttata	2		Vibrio alginolyticus 12G01	1	Proteobacteria
Trichomonas vaginalis G3	25		Vibrio alginolyticus 40B	1	Proteobacteria
Verrucomicrobium spinosum DSM 4136	1		Vibrio cholera CIRS 101	1	Proteobacteria
Vibrio alginolyticus 12G01	1		Vibrio cholerae 1587	1	Proteobacteria
Vibrio alginolyticus 40B	1		Vibrio cholerae 2740-80	1	Proteobacteria
Vibrio cholera CIRS 101	1		Vibrio cholerae 623-39	1	Proteobacteria
Vibrio cholerae 1587	1		Vibrio cholerae AM-19226	1	Proteobacteria
Vibrio cholerae 2740-80	1		Vibrio cholerae B33	2	Proteobacteria
Vibrio cholerae 623-39	1		Vibrio cholerae bv. albensis VL426	1	Proteobacteria
Vibrio cholerae AM-19226	1		Vibrio cholerae BX 330286	1	Proteobacteria
Vibrio cholerae B33	2		Vibrio cholerae INDRE 91/1	1	Proteobacteria
Vibrio cholerae bv. albensis VL426	1		Vibrio cholerae M66-2	1	Proteobacteria
Vibrio cholerae BX 330286	1		Vibrio cholerae MAK 757	1	Proteobacteria
Vibrio cholerae INDRE 91/1	1		Vibrio cholerae MJ-1236	1	Proteobacteria
Vibrio cholerae M66-2	1		Vibrio cholerae MO10	1	Proteobacteria
Vibrio cholerae MAK 757	1		Vibrio cholerae MZO-3	2	Proteobacteria
Vibrio cholerae MJ-1236	1		Vibrio cholerae NCTC 8457	1	Proteobacteria
Vibrio cholerae MO10	1		Vibrio cholerae O1 biovar El Tor str. N16961	1	Proteobacteria
Vibrio cholerae MZO-3	2		Vibrio cholerae O395	1	Proteobacteria
Vibrio cholerae NCTC 8457	1		Vibrio cholerae RC385	1	Proteobacteria
Vibrio cholerae O1 biovar El Tor str. N16961	1		Vibrio cholerae RC9	1	Proteobacteria
Vibrio cholerae O395	1		Vibrio cholerae TMA 21	1	Proteobacteria
Vibrio cholerae RC385	1		Vibrio cholerae V51	2	Proteobacteria
Vibrio cholerae RC9	1		Vibrio cholerae V52	1	Proteobacteria
Vibrio cholerae TMA 21	1		Vibrio fischeri ES114	1	Proteobacteria
Vibrio cholerae V51	2		Vibrio fischeri MJ11	1	Proteobacteria
Vibrio cholerae V52	1		Vibrio harveyi 1DA3	1	Proteobacteria
Vibrio fischeri ES114	1		Vibrio harveyi HY01	1	Proteobacteria
Vibrio fischeri MJ11	1		Vibrio mimicus MB-451	1	Proteobacteria
Vibrio harveyi 1DA3	1		Vibrio mimicus VM223	1	Proteobacteria
Vibrio harveyi HY01	1		Vibrio mimicus VM573	2	Proteobacteria
Vibrio mimicus MB-451	1		Vibrio mimicus VM603	1	Proteobacteria
Vibrio mimicus VM223	1		Vibrio orientalis CIP 102891	1	Proteobacteria
Vibrio mimicus VM573	2		Vibrio parahaemolyticus 16	1	Proteobacteria
Vibrio mimicus VM603	1		Vibrio parahaemolyticus AN-5034	1	Proteobacteria
Vibrio orientalis CIP 102891	1		Vibrio parahaemolyticus AQ3810	2	Proteobacteria
Vibrio parahaemolyticus 16	1		Vibrio parahaemolyticus AQ4037	2	Proteobacteria
Vibrio parahaemolyticus AN-5034	1		Vibrio parahaemolyticus K5030	2	Proteobacteria
Vibrio parahaemolyticus AQ3810	2		Vibrio parahaemolyticus Peru-466	2	Proteobacteria
Vibrio parahaemolyticus AQ4037	2		Vibrio parahaemolyticus RIMD 2210633	2	Proteobacteria
Vibrio parahaemolyticus K5030	2		Vibrio sp. Ex25	2	Proteobacteria
Vibrio parahaemolyticus Peru-466	2		Vibrio sp. MED222	1	Proteobacteria
Vibrio parahaemolyticus RIMD 2210633	2		Vibrio sp. RC586	1	Proteobacteria
Vibrio sp. Ex25	2		Vibrio splendidus LGP32	1	Proteobacteria
Vibrio sp. MED222	1		Vibrio vulnificus CMCP6	2	Proteobacteria
Vibrio sp. RC586	1		Vibrio vulnificus YJ016	1	Proteobacteria
Vibrio splendidus LGP32	1		Vibrionales bacterium SWAT-3	1	Proteobacteria
Vibrio vulnificus CMCP6	2		Xenopus laevis	1	Eukaryota - Metazoa
Vibrio vulnificus YJ016	1		Yersinia aldovae ATCC 35236	1	Proteobacteria
Vibrionales bacterium SWAT-3	1		Yersinia enterocolitica subsp. enterocolitica 8081	1	Proteobacteria
Xenopus laevis	1		Yersinia mollaretii ATCC 43969	1	Proteobacteria
Yersinia aldovae ATCC 35236	1		Yersinia ruckeri ATCC 29473	1	Proteobacteria
Yersinia enterocolitica subsp. enterocolitica 8081	1
Yersinia mollaretii ATCC 43969	1
Yersinia ruckeri ATCC 29473	1
(blank)
Grand Total	415

## Sheet: Dual PF13402 & PF03272
PSI-Blast ReSeq accession	PSI-Blast e-value	PSI-Blast score	M60 enhancin PF03272 ipr e-value	Enhancin PF03272 HMMER E-value	Enhancin PF03272 HMMER score	HMMER RefSeq accession	M60-like PF13402 HMMER score	M60-like PF13402 HMMER E-value	PF13402 minus PF03272 HMMER scores	M60-like PF13402 415 dataset	Taxa dually hit PF13402 & PF03272	Taxa	Description	gluzincin-like sequence	HEXXH position	HEXXH motif	gi
XP_002377568.1	1e-58	231	NA	7.7e-06	19.3	XP_002377568.1	233	2.4e-66	213.7	yes	1	Aspergillus flavus NRRL3357	cell wall associated protein, putative	HELGHNQQRKVWEFPPHTTECTCNLWSVYVHE	[754,758]	HELGH	238492663
XP_002372411.1	4e-32	143	0	1.2e-276	914.8	XP_002372411.1	74	5.5e-18	-840.8	no	1	Aspergillus flavus NRRL3357	viral-enhancing factor, putative	HELGHTYEPMKENFNLFSEIQVNRYSIE	[325,329]	HELGH	238482345
XP_001825930.1	2e-57	227	NA	9.2e-06	19	XP_001825930.1	230	2e-65	211	yes	1	Aspergillus oryzae RIB40	hypothetical protein	HELGHNQQRKVWEFPPHTTECTCNLWSVYVHE	[750,754]	HELGH	169782936
XP_001817345.1	3e-32	143	0	1.8e-276	914.2	XP_001817345.1	74	5.5e-18	-840.2	no	1	Aspergillus oryzae RIB40	hypothetical protein	HEIGHNLASAPFSMTGGTEVTNNILALYMQE	[1302,1306]	HEIGH	169765748
YP_021963.1	4e-85	319	NA	NA	0	YP_021963.1	307	5.5e-89	307	yes	1	Bacillus anthracis str. 'Ames Ancestor'	hypothetical protein GBAA5305	HEVGHQHQQDTWLWDGLGE	[281,285]	HEVGH
YP_020076.1	4e-42	176	2.8e-135	1.1e-154	511.4	YP_020076.1	67	1.1e-15	-444.4	no	1	Bacillus anthracis str. 'Ames Ancestor'	enhancin family protein	HELGHNMQQGRVWSFDGNGE	[327,331]	HELGH	47528727
ZP_05186275.1	1e-85	321	NA	NA	0	ZP_05186275.1	307	5.1e-89	307	yes	1	Bacillus anthracis str. A1055	wall-associated protein	HEIAHGYQAGFDNQGIFTGE	[264,268]	HEIAH
ZP_05185152.1	2e-42	177	2.8e-135	1.2e-153	508.1	ZP_05185152.1	67	1.1e-15	-441.1	no	1	Bacillus anthracis str. A1055	metallprotease, enhancin family protein	HEVGHNFQQTSTWSWSDLGE	[334,338]	HEVGH	254723364
ZP_00390010.1	8e-85	318	NA	NA	0	ZP_00390010.1	307	5.2e-89	307	yes	1	Bacillus anthracis str. A2012	hypothetical protein Bant_01000177	HEVGHQHQQDTWLWDGLGE	[281,285]	HEVGH
ZP_00393637.1	4e-42	176	8.8e-135	2e-154	510.6	ZP_00393637.1	67	1.1e-15	-443.6	no	1	Bacillus anthracis str. A2012	hypothetical protein Bant_01004104	HEVGHVHQTRPYLSWGGLGE	[332,336]	HEVGH	65320678
NP_847482.1	4e-85	319	NA	NA	0	NP_847482.1	307	5.5e-89	307	yes	1	Bacillus anthracis str. Ames	hypothetical protein BA_5305	HEIAHGYQAGFDNQGIFTGE	[264,268]	HEIAH
NP_845726.1	4e-42	176	2.8e-135	1.1e-154	511.4	NP_845726.1	67	1.1e-15	-444.4	no	1	Bacillus anthracis str. Ames	enhancin family protein	HEFGHLMQMQPIDWDGLGEVTVNIFSLKAE	[309,313]	HEFGH	30263349
ZP_05208995.1	4e-85	319	NA	NA	0	ZP_05208995.1	307	5.5e-89	307	yes	1	Bacillus anthracis str. Australia 94	hypothetical protein BantA9_01517	HEVGHQHQQDTWLWDGLGE	[281,285]	HEVGH
ZP_05213285.1	4e-42	176	2.8e-135	1.1e-154	511.4	ZP_05213285.1	67	1.1e-15	-444.4	no	1	Bacillus anthracis str. Australia 94	metallprotease, enhancin family protein	HEFGHVNQVRPNMKWVGTTE	[300,304]	HEFGH	254761261
YP_002817846.1	4e-85	319	NA	NA	0	YP_002817846.1	307	5.5e-89	307	yes	1	Bacillus anthracis str. CDC 684	hypothetical protein BAMEG_5358	HEIAHGYQAGFDNQGIFTGE	[264,268]	HEIAH
YP_002813791.1	4e-42	176	2.8e-135	1.1e-154	511.4	YP_002813791.1	67	1.1e-15	-444.4	no	1	Bacillus anthracis str. CDC 684	metallprotease, enhancin family	HEVGHNFQQTSTWSWSDLGE	[334,338]	HEVGH	227813782
ZP_05150351.1	4e-85	319	NA	NA	0	ZP_05150351.1	307	5.5e-89	307	yes	1	Bacillus anthracis str. CNEVA-9066	hypothetical protein BantC_21900	HEIAHGYQAGFDNQGIFTGE	[264,268]	HEIAH
ZP_05149820.1	4e-42	176	NA	9.4e-155	511.7	ZP_05149820.1	67	1.1e-15	-444.7	no	1	Bacillus anthracis str. CNEVA-9066	metallprotease, enhancin family protein	HELGHNMQQGRVWSFDGNGE	[327,331]	HELGH	254685961
ZP_05201895.1	4e-85	319	NA	NA	0	ZP_05201895.1	307	5.5e-89	307	yes	1	Bacillus anthracis str. Kruger B	hypothetical protein BantKB_24984	HEVGHQHQQDTWLWDGLGE	[281,285]	HEVGH
			NA	9.4e-155	511.7	ZP_05200087.1	67	1.1e-15	-444.7	no	1	Bacillus anthracis str. Kruger B	metallprotease, enhancin family protein	HEIGHLHQLWPITPYTVLGE	[304,308]	HEIGH	254742402
YP_031170.1	4e-85	319	NA	NA	0	YP_031170.1	307	5.5e-89	307	yes	1	Bacillus anthracis str. Sterne	hypothetical protein BAS4929	HEIAHGYQAGFDNQGIFTGE	[264,268]	HEIAH
YP_029447.1	4e-42	176	2.8e-135	1.1e-154	511.4	YP_029447.1	67	1.1e-15	-444.4	no	1	Bacillus anthracis str. Sterne	enhancin family protein	HEVGHVHQTRPYLSWGGLGE	[332,336]	HEVGH	49186195
ZP_05203030.1	4e-85	319	NA	NA	0	ZP_05203030.1	307	5.5e-89	307	yes	1	Bacillus anthracis str. Vollum	hypothetical protein BantV_00927	HEVGHQHQQDTWLWDGLGE	[281,285]	HEVGH
ZP_05204784.1	4e-42	176	2.8e-135	1.1e-154	511.4	ZP_05204784.1	67	1.1e-15	-444.4	no	1	Bacillus anthracis str. Vollum	metallprotease, enhancin family protein	HEFGHLMQMQPIDWDGLGEVTVNIFSLKAE	[309,313]	HEFGH	254752748
ZP_05193406.1	4e-85	319	NA	NA	0	ZP_05193406.1	307	5.5e-89	307	yes	1	Bacillus anthracis str. Western North Ameri	hypothetical protein BantWNA_11134	HEIAHGYQAGFDNQGIFTGE	[264,268]	HEIAH
ZP_05196135.1	4e-42	176	2.8e-135	1.1e-154	511.4	ZP_05196135.1	67	1.1e-15	-444.4	no	1	Bacillus anthracis str. Western North Ameri	metallprotease, enhancin family protein	HEIGHNINQGSYAVVEVTNNYFSQISQAHE	[1179,1183]	HEIGH	254738432
ZP_04309267.1	3e-80	303	NA	1.2e-09	31.9	ZP_04309267.1	305	3.2e-88	273.1	yes	1	Bacillus cereus 172560W	S-layer domain protein	HEAGHMRQQTPWNFKNMTEVQVNLYSLAVE	[296,300]	HEAGH	229181971
ZP_04308684.1	5e-91	339	NA	3.8e-09	30.2	ZP_04308684.1	300	1.1e-86	269.8	yes	1	Bacillus cereus 172560W	hypothetical protein bcere0005_46970	HEVGHQHQQDTWLWDGLGE	[281,285]	HEVGH	229181355
ZP_04307018.1	2e-40	171	4.5e-140	1e-156	518.2	ZP_04307018.1	66	2.1e-15	-452.2	no	1	Bacillus cereus 172560W	Metallprotease, enhancin				229179668
ZP_04253786.1	3e-87	326	NA	NA	0	ZP_04253786.1	299	2.2e-86	299	yes	1	Bacillus cereus 95/8201	hypothetical protein bcere0016_48850	HEAGHARQQYPWTWNDLRGMGE	[286,290]	HEAGH
ZP_04253785.1	5e-93	345	NA	1.1e-08	28.7	ZP_04253785.1	305	2.5e-88	276.3	yes	1	Bacillus cereus 95/8201	hypothetical protein bcere0016_48840	HEVGHLHQQEPWKWSKVRE	[288,292]	HEVGH	229124600
ZP_04252126.1	2e-41	174	NA	7.4e-156	515.4	ZP_04252126.1	67	1e-15	-448.4	no	1	Bacillus cereus 95/8201	Metallprotease, enhancin	HELGHNLQTNRLNVQYATAANSDNWTGYGSRAGE	[785,789]	HELGH	229122918
ZP_03234378.1	4e-76	289	NA	NA	0	ZP_03234378.1	294	4.8e-85	294	yes	1	Bacillus cereus AH1134	fibronectin type III domain protein	HEAGHLRQQSPWKFYNMTEVQNNIYSLSVE	[296,300]	HEAGH
ZP_03233872.1	1e-79	300	NA	8.7e-10	32.3	ZP_03233872.1	304	5.9e-88	271.7	yes	1	Bacillus cereus AH1134	fibronectin type III domain protein	HEVGHLHQQAPWFWSGIGE	[292,296]	HEVGH	206972950
ZP_03231149.1	3e-90	336	NA	3.2e-09	30.4	ZP_03231149.1	302	2.8e-87	271.6	yes	1	Bacillus cereus AH1134	wall-associated protein	HEIAHGYQAGFDNQGIFTGE	[264,268]	HEIAH	206970196
ZP_03230028.1	1e-40	171	0	4.9e-156	516	ZP_03230028.1	65	3.4e-15	-451	no	1	Bacillus cereus AH1134	metallprotease, enhancin family				206969073
ZP_04191382.1	2e-77	293	NA	NA	0	ZP_04191382.1	293	1.3e-84	293	yes	1	Bacillus cereus AH676	Fibronectin type III domain protein	HEVGHLHQQAPWQWTGMGE	[291,295]	HEVGH
ZP_04194307.1	4e-90	335	NA	4.3e-09	30	ZP_04194307.1	302	2.8e-87	272	yes	1	Bacillus cereus AH676	hypothetical protein bcere0027_47080	HEAGHARQQYPWTWNDLRGMGE	[286,290]	HEAGH	229049750
ZP_04192671.1	7e-42	175	5.7e-137	9.4e-156	515	ZP_04192671.1	66	1.2e-15	-449	no	1	Bacillus cereus AH676	Metallprotease, enhancin	HEIGHQFQSNWGWGSYGEVTNNVLNYIHYSMMTE	[94,98]	HEIGH	229047048
YP_002454094.1	1e-86	324	NA	NA	0	YP_002454094.1	296	1.1e-85	296	yes	1	Bacillus cereus AH820	wall-associated protein	HEMGHQRQPNPWTWNGLGE	[284,288]	HEMGH
YP_002454093.1	4e-93	346	NA	8.2e-09	29.1	YP_002454093.1	306	1e-88	276.9	yes	1	Bacillus cereus AH820	wall-associated protein	HEVGHLHQQEPWKWSKVRE	[291,295]	HEVGH	218906259
YP_002452359.1	7e-42	175	6.1e-137	2.5e-155	513.6	YP_002452359.1	67	1.1e-15	-446.6	no	1	Bacillus cereus AH820	metallprotease, enhancin family				218904525
ZP_04320752.1	1e-74	285	NA	NA	0	ZP_04320752.1	290	9.8e-84	290	yes	1	Bacillus cereus ATCC 10876	Fibronectin type III domain protein	HEAGHTRQQNPWTWASNGMTE	[296,300]	HEAGH
ZP_04320291.1	4e-89	332	NA	2.2e-10	34.3	ZP_04320291.1	310	6.7e-90	275.7	yes	1	Bacillus cereus ATCC 10876	hypothetical protein bcere0002_49870	HEIAHGYQAGFDNQGIFTGE	[264,268]	HEIAH	229193341
ZP_04319929.1	2e-80	303	NA	3.9e-10	33.5	ZP_04319929.1	304	5.9e-88	270.5	yes	1	Bacillus cereus ATCC 10876	S-layer domain protein	HEVGHIHQQVPWLSEGMGE	[290,294]	HEVGH	229192972
ZP_04318470.1	1e-40	171	2.4e-139	1.8e-156	517.4	ZP_04318470.1	66	2.3e-15	-451.4	no	1	Bacillus cereus ATCC 10876	Metallprotease, enhancin				229191487
NP_834723.1	1e-85	321	NA	6.3e-09	29.5	NP_834723.1	300	1.2e-86	270.5	yes	1	Bacillus cereus ATCC 14579	wall-associated protein precursor	HEVGHLHQQEPWKWSKVRE	[291,295]	HEVGH	30023092
NP_833119.1	6e-41	172	1.9e-129	4.4e-153	506.2	NP_833119.1	65	4.6e-15	-441.2	no	1	Bacillus cereus ATCC 14579	enhancin	HEVGHNSAEAPFNVDGATE	[1310,1314]	HEVGH	30021488
YP_002366602.1	6e-78	295	NA	NA	0	YP_002366602.1	293	1.4e-84	293	yes	1	Bacillus cereus B4264	S-layer domain protein	HEAGHQRQQTWKWSGLTE	[286,290]	HEAGH
YP_002369867.1	1e-91	340	NA	6.4e-09	29.5	YP_002369867.1	302	2.8e-87	272.5	yes	1	Bacillus cereus B4264	wall-associated protein	HEIAHGYQAGFDNQGIFTGE	[255,259]	HEIAH	218232772
YP_002368097.1	2e-40	171	3.3e-136	1.2e-154	511.3	YP_002368097.1	65	3.4e-15	-446.3	no	1	Bacillus cereus B4264	metallprotease, enhancin family				218235717
ZP_04259276.1	2e-90	337	NA	6.7e-09	29.4	ZP_04259276.1	301	3.9e-87	271.6	yes	1	Bacillus cereus BDRD-Cer4	hypothetical protein bcere0015_47530	HEVGHQHQQETWLWDGLGE	[281,285]	HEVGH	229130317
ZP_04257640.1	3e-41	173	1.3e-134	2.7e-154	510.2	ZP_04257640.1	68	5.4e-16	-442.2	no	1	Bacillus cereus BDRD-Cer4	Metallprotease, enhancin	HEIGHGYQGVFMNDVDLPVGE	[240,244]	HEIGH	229128662
ZP_04275957.1	1e-90	337	NA	5.5e-09	29.7	ZP_04275957.1	301	3.8e-87	271.3	yes	1	Bacillus cereus BDRD-ST24	hypothetical protein bcere0012_47390	HEVGHLHQQEPWKWSKVRE	[282,286]	HEVGH	229147613
ZP_04274345.1	2e-39	167	3.6e-105	2.3e-126	417.9	ZP_04274345.1	69	2.5e-16	-348.9	no	1	Bacillus cereus BDRD-ST24	Metallprotease, enhancin				229145966
YP_086361.1	2e-85	320	NA	4.9e-12	39.8	YP_086361.1	303	1.6e-87	263.2	yes	1	Bacillus cereus E33L	wall-associated protein	HEVGHLHQQEPWKWSKVRE	[234,238]	HEVGH	52140468
YP_245638.1	6e-37	159	2e-104	2.9e-125	414.2	YP_245638.1	69	2.6e-16	-345.2	no	1	Bacillus cereus E33L	enhancin family protein	HELGHNHQKPGWTFRPHTTEALCNLWSIYVHE	[748,752]	HELGH	67078018
YP_084679.1	1e-42	178	0	4.7e-157	519.3	YP_084679.1	69	2.7e-16	-450.3	no	1	Bacillus cereus E33L	enhancin family protein	HEFGHQNQMQWSWNGLGE	[333,337]	HEFGH	52142151
ZP_04206946.1	2e-80	303	NA	4.1e-10	33.4	ZP_04206946.1	303	8.6e-88	269.6	yes	1	Bacillus cereus F65185	S-layer domain protein	HEVGHQHQQDTWLWDGLGE	[281,285]	HEVGH	229073860
ZP_04205749.1	1e-90	337	NA	8.7e-09	29	ZP_04205749.1	294	5.5e-85	265	yes	1	Bacillus cereus F65185	hypothetical protein bcere0025_47080	HEIAHGYQAGFDNQGIFTGE	[275,279]	HEIAH	229072547
ZP_04204064.1	2e-40	171	6.4e-140	8.5e-157	518.5	ZP_04204064.1	65	3.3e-15	-453.5	no	1	Bacillus cereus F65185	Metallprotease, enhancin	HEYAHHFQNGWTYGNWGEVSNNALNLISMATMME	[38,42]	HEYAH	229070836
ZP_04300725.1	3e-76	289	NA	NA	0	ZP_04300725.1	298	4.9e-86	298	yes	1	Bacillus cereus MM3	Fibronectin type III domain protein	HEVGHLHQQIPWLSKGMGE	[290,294]	HEVGH
ZP_04303264.1	1e-89	334	NA	4.8e-09	29.9	ZP_04303264.1	308	3.4e-89	278.1	yes	1	Bacillus cereus MM3	hypothetical protein bcere0006_48340	HEIAHGYQAGFDNQGIFTGE	[264,268]	HEIAH	229175758
ZP_04301600.1	1e-42	178	1.2e-138	9.6e-158	521.6	ZP_04301600.1	70	1.3e-16	-451.6	no	1	Bacillus cereus MM3	Metallprotease, enhancin	HEYGHHYQTSYNSYGLFGE	[449,453]	HEYGH	229174064
ZP_03106796.1	1e-89	334	NA	7.5e-09	29.2	ZP_03106796.1	294	6e-85	264.8	yes	1	Bacillus cereus NVH0597-99	wall-associated protein	HEAGHARQQYPWTWNDLRGMGE	[276,280]	HEAGH	196039491
ZP_03105337.1	1e-41	174	0	2.4e-155	513.7	ZP_03105337.1	67	8.5e-16	-446.7	no	1	Bacillus cereus NVH0597-99	metallprotease, enhancin family	HELGHGLERGRLRFDGHE	[770,774]	HELGH	196038027
ZP_04238966.1	2e-77	293	NA	NA	0	ZP_04238966.1	293	1.3e-84	293	yes	1	Bacillus cereus Rock1-15	Fibronectin type III domain protein	HEIAHGYQAGFDNQGIFTGE	[266,270]	HEIAH
ZP_04242042.1	2e-90	337	NA	5.2e-09	29.8	ZP_04242042.1	301	6.4e-87	271.2	yes	1	Bacillus cereus Rock1-15	hypothetical protein bcere0018_47450	HEIAHGYQAGFDNQGIFTGE	[252,256]	HEIAH	229112505
ZP_04240369.1	4e-41	173	2.1e-138	1.4e-156	517.7	ZP_04240369.1	68	5.5e-16	-449.7	no	1	Bacillus cereus Rock1-15	Metallprotease, enhancin	HEIGHGYQGVFMNDVDPPVGE	[240,244]	HEIGH	229110806
ZP_04248750.1	7e-84	315	NA	NA	0	ZP_04248750.1	306	1.1e-88	306	yes	1	Bacillus cereus Rock1-3	S-layer domain protein	HEIAHGYQAGFDNQGIFTGE	[255,259]	HEIAH
ZP_04248460.1	5e-78	295	NA	NA	0	ZP_04248460.1	305	3.8e-88	305	yes	1	Bacillus cereus Rock1-3	Fibronectin type III domain protein	HEAGHARQQYPWTWNDLRGMGE	[272,276]	HEAGH
ZP_04247877.1	1e-78	298	NA	NA	0	ZP_04247877.1	281	6.4e-81	281	yes	1	Bacillus cereus Rock1-3	hypothetical protein bcere0017_47900	HEIAHGYQAGFDNQGIFTGE	[264,268]	HEIAH
ZP_04245415.1	4e-83	312	1.1e-05	6e-09	29.6	ZP_04245415.1	307	8e-89	277.4	yes	1	Bacillus cereus Rock1-3	S-layer domain protein	HEIAHGYQAGFDNQGIFTGE	[264,268]	HEIAH	229116021
ZP_04246240.1	3e-38	163	NA	8.4e-157	518.5	ZP_04246240.1	69	1.6e-16	-449.5	no	1	Bacillus cereus Rock1-3	Metallprotease, enhancin	HEYGHHYQTSYNSYGPFGE	[474,478]	HEYGH	229116856
ZP_04237054.1	1e-78	298	NA	NA	0	ZP_04237054.1	305	3.4e-88	305	yes	1	Bacillus cereus Rock3-28	Fibronectin type III domain protein	HEAGHLRQQWPWNFYNMTEVQNNIYSLSVE	[296,300]	HEAGH
ZP_04236724.1	2e-77	293	NA	NA	0	ZP_04236724.1	284	7.3e-82	284	yes	1	Bacillus cereus Rock3-28	Fibronectin type III domain protein	HEIAHGYQAGFDNQGIFTGE	[252,256]	HEIAH
ZP_04233797.1	8e-81	305	NA	7.1e-09	29.3	ZP_04233797.1	307	7.5e-89	277.7	yes	1	Bacillus cereus Rock3-28	S-layer domain protein	HEVGHQHQQDTWLWDGLGE	[281,285]	HEVGH	229103110
ZP_04234601.1	1e-41	174	2.5e-132	1.4e-151	501.3	ZP_04234601.1	67	7.1e-16	-434.3	no	1	Bacillus cereus Rock3-28	Metallprotease, enhancin	HEIGHGYQGVFMNDVDLPVGE	[240,244]	HEIGH	229103923
			NA	NA	0	ZP_04231422.1	305	3.4e-88	305	yes	1	Bacillus cereus Rock3-29	Fibronectin type III domain protein	HEAGHLRQQSPWKFYNMTEVQNNIYSLSVE	[296,300]	HEAGH
ZP_04231342.1	3e-80	303	NA	NA	0	ZP_04231342.1	286	1.8e-82	286	yes	1	Bacillus cereus Rock3-29	Fibronectin type III domain protein	HEAGHARQQYPWTWNDLRGMGE	[32,36]	HEAGH
ZP_04228026.1	3e-83	313	1.1e-05	6.2e-09	29.5	ZP_04228026.1	307	8.4e-89	277.5	yes	1	Bacillus cereus Rock3-29	S-layer domain protein	HEIAHGYQAGFDNQGIFTGE	[264,268]	HEIAH	229097059
ZP_04228801.1	3e-38	163	1.5e-137	8.4e-157	518.5	ZP_04228801.1	69	1.6e-16	-449.5	no	1	Bacillus cereus Rock3-29	Metallprotease, enhancin	HEYGHHYQTSYNSYGPFGE	[474,478]	HEYGH	229097848
ZP_04225257.1	4e-93	345	NA	3e-09	30.5	ZP_04225257.1	315	1.9e-91	284.5	yes	1	Bacillus cereus Rock3-42	hypothetical protein bcere0021_48880	HELGHNHQSPPFTMEGQTEVSVNIFSMVCE	[495,499]	HELGH	229094178
ZP_04223521.1	7e-40	169	5.6e-137	5.7e-155	512.4	ZP_04223521.1	67	1.1e-15	-445.4	no	1	Bacillus cereus Rock3-42	Metallprotease, enhancin				229092349
ZP_04215346.1	1e-80	304	NA	6.8e-10	32.7	ZP_04215346.1	305	2.1e-88	272.3	yes	1	Bacillus cereus Rock4-2	S-layer domain protein	HEVGHLHQQRPWDWDAVGE	[291,295]	HEVGH	229082924
ZP_04214770.1	9e-92	341	NA	9.8e-09	28.9	ZP_04214770.1	300	1.1e-86	271.1	yes	1	Bacillus cereus Rock4-2	hypothetical protein bcere0023_49240	HEAGHLRQQSPWKFYNMTEVQNNIYSLSVE	[296,300]	HEAGH	229082307
ZP_04213119.1	1e-40	171	1.8e-139	1.8e-156	517.4	ZP_04213119.1	66	2.2e-15	-451.4	no	1	Bacillus cereus Rock4-2	Metallprotease, enhancin				229080599
ZP_03100442.1	7e-87	325	NA	4.5e-07	23.3	ZP_03100442.1	298	3e-86	274.7	yes	1	Bacillus cereus W	wall-associated protein	HEVGHLHQQEPWKWSKVRE	[288,292]	HEVGH	196033029
ZP_03100686.1	2e-92	343	NA	8.2e-09	29.1	ZP_03100686.1	303	1.4e-87	273.9	yes	1	Bacillus cereus W	wall-associated protein	HEIAHGYQAGFDNQGIFTGE	[252,256]	HEIAH	196033273
ZP_03102903.1	2e-41	174	0	7.4e-156	515.4	ZP_03102903.1	67	1e-15	-448.4	no	1	Bacillus cereus W	metallprotease, enhancin family		[768,772]	HELGH	196035499
ZP_04138897.1	2e-77	293	NA	NA	0	ZP_04138897.1	293	1.3e-84	293	yes	1	Bacillus thuringiensis Bt407	Fibronectin type III domain protein	HEVGHLHQQEPWKWSKVRE	[291,295]	HEVGH
ZP_04140386.1	2e-80	304	6.2e-06	2e-08	27.8	ZP_04140386.1	306	1.5e-88	278.2	yes	1	Bacillus thuringiensis Bt407	S-layer domain protein	HEVGHLHQQAPWFWSGIGE	[292,296]	HEVGH	228980070
ZP_04142094.1	8e-92	341	NA	4.8e-07	23.3	ZP_04142094.1	299	1.8e-86	275.7	yes	1	Bacillus thuringiensis Bt407	hypothetical protein bthur0002_49580	HEVGHLHQQAPWEWEDLGE	[291,295]	HEVGH	228981799
ZP_04140245.1	2e-40	171	NA	1.2e-155	514.7	ZP_04140245.1	67	8.3e-16	-447.7	no	1	Bacillus thuringiensis Bt407	Metallprotease, enhancin	HELGHNLQTNRLNVQYAAANNSDNWAGYSSRAGE	[789,793]	HELGH	228979925
ZP_04099141.1	5e-93	345	NA	8.2e-09	29.1	ZP_04099141.1	306	1.3e-88	276.9	yes	1	Bacillus thuringiensis serovar andalousiensis BGSC 4AW1	hypothetical protein bthur0009_47800	HEAGHLRQQSPWKFYNMTEVQNNIYSLSVE	[296,300]	HEAGH	228936343
ZP_04097503.1	2e-41	174	NA	1.7e-154	510.9	ZP_04097503.1	66	1.3e-15	-444.9	no	1	Bacillus thuringiensis serovar andalousiensis BGSC 4AW1	Metallprotease, enhancin	HEYAHNFQQNWGFGWFYSYSE	[359,363]	HEYAH	228934670
ZP_04103158.1	2e-80	304	6.2e-06	2e-08	27.8	ZP_04103158.1	306	1.5e-88	278.2	yes	1	Bacillus thuringiensis serovar berliner ATCC 10792	S-layer domain protein	HEVGHIHQQVPWLSEGMGE	[290,294]	HEVGH	228940592
ZP_04104770.1	8e-92	341	NA	4.8e-07	23.3	ZP_04104770.1	299	1.8e-86	275.7	yes	1	Bacillus thuringiensis serovar berliner ATCC 10792	hypothetical protein bthur0008_48610	HEAGHARQQYPWTWNDLRGMGE	[272,276]	HEAGH	228942230
ZP_04105302.1	2e-35	154	NA	NA	0	ZP_04105302.1	113	1.1e-29	113	yes	1	Bacillus thuringiensis serovar berliner ATCC 10792	Fibronectin type III domain protein	HEIGHAYDLVFTQGTNLHE	[247,251]	HEIGH
ZP_04101632.1	8e-36	155	NA	NA	0	ZP_04101632.1	111	2.4e-29	111	yes	1	Bacillus thuringiensis serovar berliner ATCC 10792	Fibronectin type III domain protein	HELGHNQQRHGWEFPPHTTEATCNLWSVYVHE	[757,761]	HELGH
ZP_04103016.1	2e-40	171	2.6e-137	1.2e-155	514.7	ZP_04103016.1	67	8.3e-16	-447.7	no	1	Bacillus thuringiensis serovar berliner ATCC 10792	Metallprotease, enhancin	HELGHNLQTNRLNVQYAAANNSDNWAGYSSRAGE	[789,793]	HELGH	228940447
ZP_04087543.1	5e-81	305	NA	8.4e-09	29.1	ZP_04087543.1	305	2.9e-88	275.9	yes	1	Bacillus thuringiensis serovar huazhongensis BGSC 4BD1	S-layer domain protein	HEAGHLRQQSPWKFYNMTEVQNNIYSLSVE	[296,300]	HEAGH	228924290
ZP_04087070.1	2e-91	340	NA	4.4e-10	33.3	ZP_04087070.1	304	6.6e-88	270.7	yes	1	Bacillus thuringiensis serovar huazhongensis BGSC 4BD1	hypothetical protein bthur0011_47670	HEIAHGYQAGFDNQGIFTGE	[266,270]	HEIAH	228923792
ZP_04085415.1	5e-41	173	8.1e-133	4.2e-153	506.2	ZP_04085415.1	69	1.7e-16	-437.2	no	1	Bacillus thuringiensis serovar huazhongensis BGSC 4BD1	Metallprotease, enhancin	HELGHNQQRSGWEFRPHTTEATCNLWSVYVHE	[758,762]	HELGH	228922105
YP_039079.1	2e-93	347	NA	1.8e-08	28	YP_039079.1	312	2.1e-90	284	yes	1	Bacillus thuringiensis serovar konkukian str. 97-27	wall-associated protein	HEIGHGYQMSFRNDRYFWNGE	[247,251]	HEIGH	49481519
YP_037494.1	2e-41	174	NA	1.7e-154	510.9	YP_037494.1	66	1.3e-15	-444.9	no	1	Bacillus thuringiensis serovar konkukian str. 97-27	enhancin family protein	HEYHHQFQNNWGWSYWGEVTNNVLNMIDMALLCE	[352,356]	HEYHH	49479004
ZP_04117334.1	6e-91	338	NA	6.4e-09	29.5	ZP_04117334.1	300	1.1e-86	270.5	yes	1	Bacillus thuringiensis serovar kurstaki str. T03a001	hypothetical protein bthur0006_46840	HEVGHLHQQAPWFWSGVGE	[291,295]	HEVGH	228955326
ZP_04117796.1	1e-79	300	NA	4.8e-10	33.2	ZP_04117796.1	302	2.2e-87	268.8	yes	1	Bacillus thuringiensis serovar kurstaki str. T03a001	S-layer domain protein	HEVGHQHQQDTWLWDGLGE	[272,276]	HEVGH	228955817
ZP_04115705.1	2e-40	171	4.2e-137	1.6e-155	514.2	ZP_04115705.1	64	4.9e-15	-450.2	no	1	Bacillus thuringiensis serovar kurstaki str. T03a001	Metallprotease, enhancin	HEVGHNSAEAPFNVDGATE	[1310,1314]	HEVGH	228953665
ZP_04111067.1	5e-93	345	NA	5.8e-09	29.6	ZP_04111067.1	307	7.5e-89	277.4	yes	1	Bacillus thuringiensis serovar monterrey BGSC 4AJ1	hypothetical protein bthur0007_49140	HEVGHQHQQDTWLWDGLGE	[281,285]	HEVGH	228948790
ZP_04111485.1	2e-79	300	NA	2.8e-09	30.7	ZP_04111485.1	298	4.1e-86	267.3	yes	1	Bacillus thuringiensis serovar monterrey BGSC 4AJ1	S-layer domain protein	HEVGHLHQQEPWKWSKVRE	[291,295]	HEVGH	228949218
ZP_04112386.1	1e-80	304	NA	7.5e-08	25.9	ZP_04112386.1	293	1.4e-84	267.1	yes	1	Bacillus thuringiensis serovar monterrey BGSC 4AJ1	S-layer domain protein	HEVGHIHQQVPWLSEGMGE	[290,294]	HEVGH	228950208
ZP_04109312.1	2e-41	174	NA	7.4e-156	515.4	ZP_04109312.1	67	1e-15	-448.4	no	1	Bacillus thuringiensis serovar monterrey BGSC 4AJ1	Metallprotease, enhancin	HEIGHNLAAAPFNVKGATE	[1223,1227]	HEIGH	228947015
ZP_04122922.1	4e-94	349	NA	1.4e-07	25	ZP_04122922.1	306	1.6e-88	281	yes	1	Bacillus thuringiensis serovar pakistani str. T13001	hypothetical protein bthur0005_47520	HEVGHLHQQEPWKWSKVRE	[291,295]	HEVGH	228961305
ZP_04121263.1	2e-41	174	3.1e-136	3.8e-155	513	ZP_04121263.1	67	6.2e-16	-446	no	1	Bacillus thuringiensis serovar pakistani str. T13001	Metallprotease, enhancin	HEIGHGYQGVFMNDVDLPVGE	[240,244]	HEIGH	228959582
ZP_04093101.1	5e-87	325	NA	NA	0	ZP_04093101.1	300	8.1e-87	300	yes	1	Bacillus thuringiensis serovar pondicheriensis BGSC 4BA1	hypothetical protein bthur0010_47730	HEAGHLRQQSPWKFYNMTEVQNNIYSLSVE	[322,326]	HEAGH
ZP_04093100.1	6e-93	345	NA	8.2e-09	29.1	ZP_04093100.1	306	1e-88	276.9	yes	1	Bacillus thuringiensis serovar pondicheriensis BGSC 4BA1	hypothetical protein bthur0010_47720	HEVGHLHQQEPWKWSKVRE	[291,295]	HEVGH	228930090
ZP_04091477.1	2e-41	174	1.8e-137	7.2e-156	515.4	ZP_04091477.1	67	8.4e-16	-448.4	no	1	Bacillus thuringiensis serovar pondicheriensis BGSC 4BA1	Metallprotease, enhancin	HEVGHNAAEAPFNVDGATE	[1294,1298]	HEVGH	228928437
ZP_04081237.1	7e-87	325	NA	2.2e-10	34.3	ZP_04081237.1	305	3.9e-88	270.7	yes	1	Bacillus thuringiensis serovar pulsiensis BGSC 4CC1	hypothetical protein bthur0012_49000	HEIAHGYQAGFDNQGIFTGE	[264,268]	HEIAH	228917696
ZP_04079571.1	1e-41	174	2.2e-135	3.7e-155	513.1	ZP_04079571.1	67	8e-16	-446.1	no	1	Bacillus thuringiensis serovar pulsiensis BGSC 4CC1	Metallprotease, enhancin	HELGHNLQTNRLNVQYAAAGDGDNWAGYGSRAGE	[787,791]	HELGH	228915998
ZP_04140245.1	2e-40	171	NA	NA	0	ZP_04132535.1	293	1.3e-84	293	yes	1	Bacillus thuringiensis serovar thuringiensis str. T01001	Fibronectin type III domain protein	HEAGHLRQQSPWKFYNMTEVQNNIYSLSVE	[296,300]	HEAGH
ZP_04134096.1	2e-80	304	6.2e-06	2e-08	27.8	ZP_04134096.1	306	1.5e-88	278.2	yes	1	Bacillus thuringiensis serovar thuringiensis str. T01001	S-layer domain protein	HEIAHGYQAGFDNQGIFTGE	[264,268]	HEIAH	228973512
ZP_04135719.1	8e-92	341	NA	4.8e-07	23.3	ZP_04135719.1	299	1.8e-86	275.7	yes	1	Bacillus thuringiensis serovar thuringiensis str. T01001	hypothetical protein bthur0003_49080				228975160
ZP_04136244.1	3e-31	140	NA	NA	0	ZP_04136244.1	92	1.5e-23	92	yes	1	Bacillus thuringiensis serovar thuringiensis str. T01001	Fibronectin type III domain protein	HEIGHAYDFQFVSNTPALNE	[242,246]	HEIGH
ZP_04133950.1	2e-40	171	NA	1.2e-155	514.7	ZP_04133950.1	67	8.3e-16	-447.7	no	1	Bacillus thuringiensis serovar thuringiensis str. T01001	Metallprotease, enhancin		[768,772]	HELGH	228973362
ZP_04148407.1	5e-88	329	4.1e-06	8.5e-11	35.7	ZP_04148407.1	308	2.8e-89	272.3	yes	1	Bacillus thuringiensis serovar tochigiensis BGSC 4Y1	hypothetical protein bthur0001_49700	HEIAHGYQAGFDNQGIFTGE	[264,268]	HEIAH	228988313
ZP_04146606.1	1e-41	174	3.6e-135	2.6e-156	516.9	ZP_04146606.1	69	2.1e-16	-447.9	no	1	Bacillus thuringiensis serovar tochigiensis BGSC 4Y1	Metallprotease, enhancin				228986470
ZP_02954286.1	1e-55	221	NA	NA	0	ZP_02954286.1	124	2.9e-33	124	yes	1	Clostridium perfringens D str. JGS1721	putative antigenic protein NP1	HEIGHNINQGKYAIAE	[1111,1115]	HEIGH
ZP_02951972.1	1e-48	198	NA	NA	0	ZP_02951972.1	86	1.2e-21	86	yes	1	Clostridium perfringens D str. JGS1721	F5/8 type C domain protein
ZP_02953684.1	3e-57	226	NA	NA	0	ZP_02953684.1	74	6.9e-18	74	yes	1	Clostridium perfringens D str. JGS1721	discoidin domain protein
ZP_02953260.1	2e-41	174	NA	NA	0	ZP_02953260.1	56	2.3e-12	56	yes	1	Clostridium perfringens D str. JGS1721	discoidin domain protein	HEVGHNLASAPFNVVGSTEVVNNILALYMQEKRE	[1224,1228]	HEVGH
ZP_02954459.1	7e-37	159	6.8e-69	2e-92	305.6	ZP_02954459.1	68	4.3e-16	-237.6	no	1	Clostridium perfringens D str. JGS1721	putative enhancin family protein	HEIGHGYQGVFMNDVDLPVGE	[240,244]	HEIGH	182626718
ZP_02954276.1	5e-39	166	3.8e-74	9.5e-106	349.7	ZP_02954276.1	72	2.4e-17	-277.7	no	1	Clostridium perfringens D str. JGS1721	LRR adjacent family	HELGHNLQVNRLKVYGGRSGE	[670,674]	HELGH	182626527
ZP_02327682.1	4e-74	283	NA	NA	0	ZP_02327682.1	229	3.1e-65	229	yes	1	Paenibacillus larvae subsp. larvae BRL-230010	S-layer domain protein	HEIGHNINQAQYAYSE	[1180,1184]	HEIGH
ZP_02240735.1	5e-20	103	2e-50	1.4e-54	180.4	ZP_02240735.1	63	1.6e-14	-117.4	no	1	Paenibacillus larvae subsp. larvae BRL-230010	enhancin family protein	HEVGHNAAEAPFVVEGATE	[1297,1301]	HEVGH	166240863
ZP_02329259.1	4e-26	123	6.1e-105	1.1e-101	336.3	ZP_02329259.1	77	1e-18	-259.3	no	1	Paenibacillus larvae subsp. larvae BRL-230010	enhancin family protein	HELGHNQQRHGWEFPPHTTEATCNLWSVYVHE	[909,913]	HELGH	167464170

## Sheet: Taxa dually hit
			Taxa	counts	Taxa high ranking
			Aspergillus flavus NRRL3357	2	Eukarya - Fungi
Count of Taxa			Aspergillus oryzae RIB40	2	Eukarya - Fungi
Row Labels	Total		Bacillus anthracis str. 'Ames Ancestor'	2	Bacteria - Firmicutes
Aspergillus flavus NRRL3357	2		Bacillus anthracis str. A1055	2	Bacteria - Firmicutes
Aspergillus oryzae RIB40	2		Bacillus anthracis str. A2012	2	Bacteria - Firmicutes
Bacillus anthracis str. 'Ames Ancestor'	2		Bacillus anthracis str. Ames	2	Bacteria - Firmicutes
Bacillus anthracis str. A1055	2		Bacillus anthracis str. Australia 94	2	Bacteria - Firmicutes
Bacillus anthracis str. A2012	2		Bacillus anthracis str. CDC 684	2	Bacteria - Firmicutes
Bacillus anthracis str. Ames	2		Bacillus anthracis str. CNEVA-9066	2	Bacteria - Firmicutes
Bacillus anthracis str. Australia 94	2		Bacillus anthracis str. Kruger B	2	Bacteria - Firmicutes
Bacillus anthracis str. CDC 684	2		Bacillus anthracis str. Sterne	2	Bacteria - Firmicutes
Bacillus anthracis str. CNEVA-9066	2		Bacillus anthracis str. Vollum	2	Bacteria - Firmicutes
Bacillus anthracis str. Kruger B	2		Bacillus anthracis str. Western North Ameri	2	Bacteria - Firmicutes
Bacillus anthracis str. Sterne	2		Bacillus cereus 172560W	3	Bacteria - Firmicutes
Bacillus anthracis str. Vollum	2		Bacillus cereus 95/8201	3	Bacteria - Firmicutes
Bacillus anthracis str. Western North Ameri	2		Bacillus cereus AH1134	4	Bacteria - Firmicutes
Bacillus cereus 172560W	3		Bacillus cereus AH676	3	Bacteria - Firmicutes
Bacillus cereus 95/8201	3		Bacillus cereus AH820	3	Bacteria - Firmicutes
Bacillus cereus AH1134	4		Bacillus cereus ATCC 10876	4	Bacteria - Firmicutes
Bacillus cereus AH1271	1		Bacillus cereus ATCC 14579	2	Bacteria - Firmicutes
Bacillus cereus AH676	3		Bacillus cereus B4264	3	Bacteria - Firmicutes
Bacillus cereus AH820	3		Bacillus cereus BDRD-Cer4	2	Bacteria - Firmicutes
Bacillus cereus ATCC 10876	4		Bacillus cereus BDRD-ST24	2	Bacteria - Firmicutes
Bacillus cereus ATCC 14579	2		Bacillus cereus E33L	3	Bacteria - Firmicutes
Bacillus cereus B4264	3		Bacillus cereus F65185	3	Bacteria - Firmicutes
Bacillus cereus BDRD-Cer4	2		Bacillus cereus MM3	3	Bacteria - Firmicutes
Bacillus cereus BDRD-ST24	2		Bacillus cereus NVH0597-99	2	Bacteria - Firmicutes
Bacillus cereus E33L	3		Bacillus cereus Rock1-15	3	Bacteria - Firmicutes
Bacillus cereus F65185	3		Bacillus cereus Rock1-3	5	Bacteria - Firmicutes
Bacillus cereus MM3	3		Bacillus cereus Rock3-28	4	Bacteria - Firmicutes
Bacillus cereus NVH0597-99	2		Bacillus cereus Rock3-29	4	Bacteria - Firmicutes
Bacillus cereus Rock1-15	3		Bacillus cereus Rock3-42	2	Bacteria - Firmicutes
Bacillus cereus Rock1-3	5		Bacillus cereus Rock4-2	3	Bacteria - Firmicutes
Bacillus cereus Rock3-28	4		Bacillus cereus W	3	Bacteria - Firmicutes
Bacillus cereus Rock3-29	4		Bacillus thuringiensis Bt407	4	Bacteria - Firmicutes
Bacillus cereus Rock3-42	2		Bacillus thuringiensis serovar andalousiensis BGSC 4AW1	2	Bacteria - Firmicutes
Bacillus cereus Rock4-2	3		Bacillus thuringiensis serovar berliner ATCC 10792	5	Bacteria - Firmicutes
Bacillus cereus W	3		Bacillus thuringiensis serovar huazhongensis BGSC 4BD1	3	Bacteria - Firmicutes
Bacillus thuringiensis Bt407	4		Bacillus thuringiensis serovar konkukian str. 97-27	2	Bacteria - Firmicutes
Bacillus thuringiensis serovar andalousiensis BGSC 4AW1	2		Bacillus thuringiensis serovar kurstaki str. T03a001	3	Bacteria - Firmicutes
Bacillus thuringiensis serovar berliner ATCC 10792	5		Bacillus thuringiensis serovar monterrey BGSC 4AJ1	4	Bacteria - Firmicutes
Bacillus thuringiensis serovar huazhongensis BGSC 4BD1	3		Bacillus thuringiensis serovar pakistani str. T13001	2	Bacteria - Firmicutes
Bacillus thuringiensis serovar konkukian str. 97-27	2		Bacillus thuringiensis serovar pondicheriensis BGSC 4BA1	3	Bacteria - Firmicutes
Bacillus thuringiensis serovar kurstaki str. T03a001	3		Bacillus thuringiensis serovar pulsiensis BGSC 4CC1	2	Bacteria - Firmicutes
Bacillus thuringiensis serovar monterrey BGSC 4AJ1	4		Bacillus thuringiensis serovar thuringiensis str. T01001	5	Bacteria - Firmicutes
Bacillus thuringiensis serovar pakistani str. T13001	2		Bacillus thuringiensis serovar tochigiensis BGSC 4Y1	2	Bacteria - Firmicutes
Bacillus thuringiensis serovar pondicheriensis BGSC 4BA1	3		Clostridium perfringens D str. JGS1721	6	Bacteria - Firmicutes
Bacillus thuringiensis serovar pulsiensis BGSC 4CC1	2		Paenibacillus larvae subsp. larvae BRL-230010	3	Bacteria - Firmicutes
Bacillus thuringiensis serovar thuringiensis str. T01001	5
Bacillus thuringiensis serovar tochigiensis BGSC 4Y1	2
Clostridium perfringens D str. JGS1721	6
Paenibacillus larvae subsp. larvae BRL-230010	3
(blank)
Grand Total	137
