# Supplementary material for: A Novel Extracellular Metallopeptidase Domain Shared by Animal Host-Associated Mutualistic and Pathogenic Microbes
Source: PLoS One. 2012 Jan 27;7(1):e30287. doi: 10.1371/journal.pone.0030287 (PMC3267712; doi:10.1371/journal.pone.0030287)
Supplement: Table S3 — Table listing all 38 MEROPS entries positive for the PF13402 profile (e-value ≤1.00E-05). (XLSX) [file pone.0030287.s010.xlsx]

## Sheet: Sheet1
Merops ID	Merops description	M60-like/PF13402 HMMer e-value	M60-like/PF13402 HMMer Score	M60-like/PF13402 start	M60-like/PF13402 end	Merops M60/enhacin start-end	M60/enhacin/PF03272 InterProScan hits
MER151941	MER151941 - family M60 unassigned peptidases (Bacillus cereus) [M60.UPW]#M60#{peptidase unit: 223-427}	1.1e-91	310.5	82	377	223-427	not hit
MER150257	MER150257 - family M60 unassigned peptidases (Bacillus cereus) [M60.UPW]#M60#{peptidase unit: 209-420}	2.5e-86	292.9	75	370	209-420	not hit
MER111749	MER111749 - family M60 unassigned peptidases (Akkermansia muciniphila) [M60.UPW]#M60#{peptidase unit: 250-458}	5.1e-67	229.5	100	403	250-458	not hit
MER178106	MER178106 - family M60 unassigned peptidases (Paenibacillus larvae) [M60.UPW]#M60#{peptidase unit: 536-870}	7.8e-21	77.8	624	856	536-870	yes
MER191074	MER191074 - enhancin-like peptidase {bacteria} (Uncinocarpus reesii) [M60.003]#M60#{peptidase unit: 6-780}	4.4e-20	75.3	102	332	6-780	yes
MER137019	MER137019 - enhancin-like peptidase {bacteria} (Aspergillus oryzae) [M60.003]#M60#{peptidase unit: 4-777}	4.9e-20	75.1	112	327	4-777	yes
MER162601	MER162601 - enhancin-like peptidase {bacteria} (Aspergillus flavus) [M60.003]#M60#{peptidase unit: 4-777}	4.9e-20	75.1	112	327	4-777	yes
MER095523	MER095523 - enhancin-like peptidase {bacteria} (Clostridium botulinum) [M60.003]#M60#{peptidase unit: 31-788}	3.9e-19	72.2	61	296	31-788	yes
MER125977	MER125977 - family M60 unassigned peptidases (Clostridium perfringens) [M60.UPW]#M60#{peptidase unit: 68-763}	4.4e-19	72	140	364	68-763	yes
MER066138	MER066138 - enhancin-like peptidase {bacteria} (Bacillus cereus) [M60.003]#M60#{peptidase unit: 23-543}	2.6e-18	69.5	137	348	23-543	yes
MER042489	MER042489 - enhancin-like peptidase {bacteria} (Bacillus thuringiensis) [M60.003]#M60#{peptidase unit: 23-742}	1.2e-17	67.3	136	344	23-742	yes
MER028974	MER028974 - enhancin-like peptidase {bacteria} (Bacillus cereus) [M60.003]#M60#{peptidase unit: 23-742}	1.2e-17	67.3	136	344	23-742	yes
MER028844	MER028844 - enhancin-like peptidase {bacteria} (Bacillus anthracis) [M60.003]#M60#{peptidase unit: 23-742}	1.5e-17	67	136	344	23-742	yes
MER035718	MER035718 - enhancin-like peptidase {bacteria} (Yersinia pestis) [M60.003]#M60#{peptidase unit: 5-779}	3.3e-17	65.8	119	328	5-779	yes
MER042490	MER042490 - enhancin-like peptidase {bacteria} (Yersinia pseudotuberculosis) [M60.003]#M60#{peptidase unit: 1-774}	3.4e-17	65.8	114	323	1-774	yes
MER150255	MER150255 - enhancin-like peptidase {bacteria} (Bacillus cereus) [M60.003]#M60#{peptidase unit: 23-742}	4.3e-17	65.5	136	344	23-742	yes
MER191081	MER191081 - enhancin-like peptidase {bacteria} (Yersinia kristensenii) [M60.003]#M60#{peptidase unit: 5-306}	1.3e-16	63.9	120	288	5-306	yes
MER191079	MER191079 - family M60 unassigned peptidases (Paenibacillus larvae) [M60.UPW]#M60#{peptidase unit: 1-217}	2.4e-16	63	7	180	1-217	yes
MER014453	MER014453 - enhancin (Lymantria dispar nucleopolyhedrovirus) [M60.001]#M60#{peptidase unit: 1-782}	9e-15	57.9	101	319	1-782	yes
MER014457	MER014457 - family M60 unassigned peptidases (Heliothis armigera granulovirus) [M60.UPW]#M60#{peptidase unit: 1-786}	1.5e-14	57.2	99	324	1-786	yes
MER136846	MER136846 - family M60 unassigned peptidases (Helicoverpa armigera granulovirus) [M60.UPW]#M60#{peptidase unit: 1-786}	1.5e-14	57.2	99	324	1-786	yes
MER125816	MER125816 - family M60 unassigned peptidases (Helicoverpa armigera granulovirus) [M60.UPW]#M60#{peptidase unit: 4-788}	2.3e-14	56.5	105	326	4-788	yes
MER014455	MER014455 - family M60 unassigned peptidases (Xestia C-nigrum granulovirus) [M60.UPW]#M60#{peptidase unit: 4-788}	4.9e-14	55.4	105	326	4-788	yes
MER014461	MER014461 - family M60 unassigned peptidases (Xestia C-nigrum granulovirus) [M60.UPW]#M60#{peptidase unit: 1-786}	2.7e-13	53	99	324	1-786	yes
MER014459	MER014459 - family M60 unassigned peptidases (Choristoneura fumiferana granulovirus) [M60.UPW]#M60#{peptidase unit: 1-787}	2.8e-13	53	97	323	1-787	yes
MER014458	MER014458 - family M60 unassigned peptidases (Pseudaletia unipuncta granulovirus) [M60.UPW]#M60#{peptidase unit: 1-787}	8.3e-13	51.4	104	323	1-787	yes
MER014456	MER014456 - family M60 unassigned peptidases (Trichoplusia ni granulovirus) [M60.UPW]#M60#{peptidase unit: 1-787}	9.5e-13	51.2	99	323	1-787	yes
MER125723	MER125723 - enhancin-like peptidase {bacteria} (Salmonella enterica) [M60.003]#M60#{peptidase unit: 12-770}	1.4e-12	50.6	38	284	12-770	yes
MER034983	MER034983 - family M60 unassigned peptidases (Choristoneura fumiferana nuclear polyhedrosis virus) [M60.UPW]#M60#{peptidase unit: 1-757}	3.5e-12	49.3	32	316	1-757	yes
MER191077	MER191077 - enhancin-2 (Euproctis pseudoconspersa nucleopolyhedrovirus) [M60.002]#M60#{peptidase unit: 7-743}	5.9e-11	45.3	95	283	7-743	yes
MER014454	MER014454 - enhancin-2 (Lymantria dispar nucleopolyhedrovirus) [M60.002]#M60#{peptidase unit: 1-788}	3.3e-09	39.6	96	275	1-788	yes
MER030203	MER030203 - family M60 unassigned peptidases (Mamestra configurata nucleopolyhedrovirus) [M60.UPW]#M60#{peptidase unit: 1-734}	8.9e-08	34.9	130	290	1-734	yes
MER118974	MER118974 - family M60 unassigned peptidases (Mamestra configurata nucleopolyhedrovirus A) [M60.UPW]#M60#{peptidase unit: 1-734}	9e-08	34.9	130	290	1-734	yes
MER118934	MER118934 - family M60 unassigned peptidases (Agrotis segetum nucleopolyhedrovirus) [M60.UPW]#M60#{peptidase unit: 7-749}	1.5e-07	34.1	60	281	7-749	yes
MER191076	MER191076 - family M60 unassigned peptidases (Helicoverpa armigera multiple nucleopolyhedrovirus) [M60.UPW]#M60#{peptidae unit: 1-734}	1.8e-07	33.9	126	279	1-734	yes
MER191073	MER191073 - family M60 unassigned peptidases (Mamestra brassicae MNPV) [M60.UPW]#M60#{peptidase unit: 1-734}	2e-07	33.7	126	279	1-734	yes
MER029638	MER029638 - family M60 unassigned peptidases (Mamestra configurata nucleopolyhedrovirus B) [M60.UPW]#M60#{peptidase unit: 1-734}	2.3e-07	33.5	130	279	1-734	yes
MER191080	MER191080 - enhancin-like peptidase {bacteria} (Listeria grayi) [M60.003]#M60#{peptidase unit: 4-509}	1.6e-06	30.8	7	120	4-509	yes
