# Supplementary material for: A Novel Extracellular Metallopeptidase Domain Shared by Animal Host-Associated Mutualistic and Pathogenic Microbes
Source: PLoS One. 2012 Jan 27;7(1):e30287. doi: 10.1371/journal.pone.0030287 (PMC3267712; doi:10.1371/journal.pone.0030287)
Supplement: Table S6 — Table listing all the bacterial taxa encoding proteins with the M60-like/PF13402 domain without evidence for being associated with animal hosts. (XLSX) [file pone.0030287.s013.xlsx]

## Sheet: Sheet1 (2)
Taxa possessing the PF13402 domain	Habitat - isolation source	Disease via/in	Number of PF13402 domain per taxa	HEXXH motif	TMD	SP or lipop
Bacteria
Firmicutes
Bacillus mycoides*	Soil/plants	Plant disease	1-2(3)	Yes	-	+(2)
Bacillus pseudomycoides DSM 12442	Soil	-	2	Yes	+(1)	+(1)
Geobacillus sp. Y412MC10	Soil	-	2	Yes	-	Yes
Bacteroidetes
Chitinophaga pinensis DSM 2588	Soil - pine litter	-	1	Yes	-	Yes
Proteobacteria
Hahella chejuensis KCTC 2396	Marine sediment	Dinoflagellates	1	-	-	Yes
Pseudomonas syringae*	Plant, fresh water, soil	Plant rot	1-2(6)	Yes	-	-
Shewanella amazonensis SB2B	Acquatic	-	1	Yes	-	Yes
Shewanella baltica*	Acquatic	-	1(4)	Yes	-	Yes
Shewanella halifaxensis HAW-EB4	Acquatic	-	2	Yes	-	Yes
Shewanella loihica PV-4	Acquatic	-	1	Yes	-	Yes
Shewanella oneidensis MR-1	Acquatic	-	1	Yes	-	Yes
Shewanella sp.*	Acquatic	-	1(3)	Yes	-	Yes
Vibrionales bacterium SWAT-3	Acquatic	-	1	Yes	-	Yes
Planctomycetes
Planctomyces limnophilus DSM 3776	Surface water	-	1	Yes	-	Yes
Verrucomicrobia
Chthoniobacter flavus Ellin428	Soil	-	1	Yes	-	Yes
*Taxa with more then one strain. See Table S5 for full listing of all species/strains and protein features
