# Supplementary material for: A Novel Extracellular Metallopeptidase Domain Shared by Animal Host-Associated Mutualistic and Pathogenic Microbes
Source: PLoS One. 2012 Jan 27;7(1):e30287. doi: 10.1371/journal.pone.0030287 (PMC3267712; doi:10.1371/journal.pone.0030287)
Supplement: Table S7 — Table listing all InterProScan hits for the 415 M60-like/PF13402 positive proteins (non-redundant list as InterProScan considers only one protein among identical entries). (XLSX) [file pone.0030287.s014.xlsx]

## Sheet: InterPro 415 PF13402 entries
Accesion	Taxa	Length	db	Enrty	Description	start	end	E-value	InterPro	Description	Go term
YP_001877245.1	Akkermansia muciniphila ATCC BAA-835	506	PatternScan	PS00142	ZINC_PROTEASE	322	331	0	NULL	NULL
YP_001877521.1	Akkermansia muciniphila ATCC BAA-835	747	superfamily	SSF49785	Gal_bind_like	35	163	3.5e-07	IPR008979	Galactose-binding like
ZP_04309267.1	Bacillus cereus 172560W	746	HMMPfam	PF02839	CBM_5_12	697	733	2.3e-06	IPR003610	Carbohydrate-binding family V/XII	Molecular Function: hydrolase activity, hydrolyzing O-glycosyl compounds (GO:0004553), Cellular Component: extracellular region (GO:0005576), Biological Process: carbohydrate metabolic process (GO:0005975), Molecular Function: carbohydrate binding (GO:0030246)
ZP_04309267.1	Bacillus cereus 172560W	746	ProfileScan	PS50853	FN3	606	690	13.842	IPR003961	Fibronectin, type III
ZP_04309267.1	Bacillus cereus 172560W	746	superfamily	SSF49265	Fibronectin type III	603	691	8.9e-16	IPR008957	Fibronectin, type III-like fold
ZP_04309267.1	Bacillus cereus 172560W	746	superfamily	SSF51055	Carbohydrate binding domain	699	743	4e-07	IPR003610	Carbohydrate-binding family V/XII	Molecular Function: hydrolase activity, hydrolyzing O-glycosyl compounds (GO:0004553), Cellular Component: extracellular region (GO:0005576), Biological Process: carbohydrate metabolic process (GO:0005975), Molecular Function: carbohydrate binding (GO:0030246)
ZP_04309267.1	Bacillus cereus 172560W	746	HMMSmart	SM00060	no description	606	679	2.7e-08	IPR003961	Fibronectin, type III
ZP_04309267.1	Bacillus cereus 172560W	746	HMMSmart	SM00495	no description	697	743	0.0011	IPR003610	Carbohydrate-binding family V/XII	Molecular Function: hydrolase activity, hydrolyzing O-glycosyl compounds (GO:0004553), Cellular Component: extracellular region (GO:0005576), Biological Process: carbohydrate metabolic process (GO:0005975), Molecular Function: carbohydrate binding (GO:0030246)
ZP_04309267.1	Bacillus cereus 172560W	746	HMMPfam	PF00041	fn3	606	683	7.9e-13	IPR003961	Fibronectin, type III
ZP_03233872.1	Bacillus cereus AH1134	746	HMMPfam	PF02839	CBM_5_12	697	733	0.0048	IPR003610	Carbohydrate-binding family V/XII	Molecular Function: hydrolase activity, hydrolyzing O-glycosyl compounds (GO:0004553), Cellular Component: extracellular region (GO:0005576), Biological Process: carbohydrate metabolic process (GO:0005975), Molecular Function: carbohydrate binding (GO:0030246)
ZP_03233872.1	Bacillus cereus AH1134	746	superfamily	SSF51055	CBM_5_12	699	743	3.9e-07	IPR003610	Carbohydrate-binding family V/XII	Molecular Function: hydrolase activity, hydrolyzing O-glycosyl compounds (GO:0004553), Cellular Component: extracellular region (GO:0005576), Biological Process: carbohydrate metabolic process (GO:0005975), Molecular Function: carbohydrate binding (GO:0030246)
ZP_03233872.1	Bacillus cereus AH1134	746	HMMSmart	SM00060	FN3	606	679	5.5e-11	IPR003961	Fibronectin, type III
ZP_03233872.1	Bacillus cereus AH1134	746	superfamily	SSF49265	FN_III-like	603	691	2.9e-15	IPR008957	Fibronectin, type III-like fold
ZP_03233872.1	Bacillus cereus AH1134	746	ProfileScan	PS50853	FN3	606	690	0	IPR003961	Fibronectin, type III
ZP_03233872.1	Bacillus cereus AH1134	746	HMMSmart	SM00495	ChtBD3	697	743	2.8e-06	IPR003610	Carbohydrate-binding family V/XII	Molecular Function: hydrolase activity, hydrolyzing O-glycosyl compounds (GO:0004553), Cellular Component: extracellular region (GO:0005576), Biological Process: carbohydrate metabolic process (GO:0005975), Molecular Function: carbohydrate binding (GO:0030246)
ZP_03233872.1	Bacillus cereus AH1134	746	HMMPfam	PF00041	fn3	606	683	1.7e-09	IPR003961	Fibronectin, type III
ZP_03234378.1	Bacillus cereus AH1134	733	superfamily	SSF49785	Gal_bind_like	438	589	1.2e-33	IPR008979	Galactose-binding like
ZP_03234378.1	Bacillus cereus AH1134	733	superfamily	SSF49785	Gal_bind_like	597	732	5.1e-32	IPR008979	Galactose-binding like
ZP_03234378.1	Bacillus cereus AH1134	733	ProfileScan	PS50022	FA58C_3	449	591	0	IPR000421	Coagulation factor 5/8 type, C-terminal	Biological Process: cell adhesion (GO:0007155)
ZP_03234378.1	Bacillus cereus AH1134	733	ProfileScan	PS50022	FA58C_3	592	733	0	IPR000421	Coagulation factor 5/8 type, C-terminal	Biological Process: cell adhesion (GO:0007155)
ZP_03234378.1	Bacillus cereus AH1134	733	HMMPfam	PF00754	F5_F8_type_C	464	586	2.3e-34	IPR000421	Coagulation factor 5/8 type, C-terminal	Biological Process: cell adhesion (GO:0007155)
ZP_03234378.1	Bacillus cereus AH1134	733	HMMPfam	PF00754	F5_F8_type_C	606	728	1.8e-31	IPR000421	Coagulation factor 5/8 type, C-terminal	Biological Process: cell adhesion (GO:0007155)
ZP_04200907.1	Bacillus cereus AH603	748	HMMPfam	PF03272	Enhancin	472	521	1e-05	IPR004954	Peptidase M60, viral enhancin protein	Biological Process: viral reproduction (GO:0016032)
ZP_04200907.1	Bacillus cereus AH603	748	HMMPfam	PF02839	CBM_5_12	699	735	3.4e-05	IPR003610	Carbohydrate-binding family V/XII	Molecular Function: hydrolase activity, hydrolyzing O-glycosyl compounds (GO:0004553), Cellular Component: extracellular region (GO:0005576), Biological Process: carbohydrate metabolic process (GO:0005975), Molecular Function: carbohydrate binding (GO:0030246)
ZP_04200907.1	Bacillus cereus AH603	748	HMMSmart	SM00060	no description	608	681	1.6e-08	IPR003961	Fibronectin, type III
ZP_04200907.1	Bacillus cereus AH603	748	HMMSmart	SM00495	no description	699	745	0.00018	IPR003610	Carbohydrate-binding family V/XII	Molecular Function: hydrolase activity, hydrolyzing O-glycosyl compounds (GO:0004553), Cellular Component: extracellular region (GO:0005576), Biological Process: carbohydrate metabolic process (GO:0005975), Molecular Function: carbohydrate binding (GO:0030246)
ZP_04200907.1	Bacillus cereus AH603	748	ProfileScan	PS50853	FN3	608	692	13.749	IPR003961	Fibronectin, type III
ZP_04200907.1	Bacillus cereus AH603	748	superfamily	SSF49265	Fibronectin type III	605	693	4.1e-15	IPR008957	Fibronectin, type III-like fold
ZP_04200907.1	Bacillus cereus AH603	748	superfamily	SSF51055	Carbohydrate binding domain	701	745	4.5e-07	IPR003610	Carbohydrate-binding family V/XII	Molecular Function: hydrolase activity, hydrolyzing O-glycosyl compounds (GO:0004553), Cellular Component: extracellular region (GO:0005576), Biological Process: carbohydrate metabolic process (GO:0005975), Molecular Function: carbohydrate binding (GO:0030246)
ZP_04200907.1	Bacillus cereus AH603	748	HMMPfam	PF00041	fn3	608	685	5.7e-11	IPR003961	Fibronectin, type III
ZP_04298280.1	Bacillus cereus AH621	746	HMMPfam	PF02839	CBM_5_12	697	733	0.00011	IPR003610	Carbohydrate-binding family V/XII	Molecular Function: hydrolase activity, hydrolyzing O-glycosyl compounds (GO:0004553), Cellular Component: extracellular region (GO:0005576), Biological Process: carbohydrate metabolic process (GO:0005975), Molecular Function: carbohydrate binding (GO:0030246)
ZP_04298280.1	Bacillus cereus AH621	746	ProfileScan	PS50853	FN3	606	690	14.263	IPR003961	Fibronectin, type III
ZP_04298280.1	Bacillus cereus AH621	746	superfamily	SSF49265	Fibronectin type III	603	691	1.2e-15	IPR008957	Fibronectin, type III-like fold
ZP_04298280.1	Bacillus cereus AH621	746	superfamily	SSF51055	Carbohydrate binding domain	699	743	3e-07	IPR003610	Carbohydrate-binding family V/XII	Molecular Function: hydrolase activity, hydrolyzing O-glycosyl compounds (GO:0004553), Cellular Component: extracellular region (GO:0005576), Biological Process: carbohydrate metabolic process (GO:0005975), Molecular Function: carbohydrate binding (GO:0030246)
ZP_04298280.1	Bacillus cereus AH621	746	HMMSmart	SM00060	no description	606	679	8.4e-09	IPR003961	Fibronectin, type III
ZP_04298280.1	Bacillus cereus AH621	746	HMMSmart	SM00495	no description	697	743	0.00088	IPR003610	Carbohydrate-binding family V/XII	Molecular Function: hydrolase activity, hydrolyzing O-glycosyl compounds (GO:0004553), Cellular Component: extracellular region (GO:0005576), Biological Process: carbohydrate metabolic process (GO:0005975), Molecular Function: carbohydrate binding (GO:0030246)
ZP_04298280.1	Bacillus cereus AH621	746	HMMPfam	PF00041	fn3	606	683	2.5e-13	IPR003961	Fibronectin, type III
ZP_04298287.1	Bacillus cereus AH621	735	HMMPfam	PF03272	Enhancin	606	655	9.9e-06	IPR004954	Peptidase M60, viral enhancin protein	Biological Process: viral reproduction (GO:0016032)
ZP_04319929.1	Bacillus cereus ATCC 10876	746	HMMPfam	PF02839	CBM_5_12	697	733	4.2e-05	IPR003610	Carbohydrate-binding family V/XII	Molecular Function: hydrolase activity, hydrolyzing O-glycosyl compounds (GO:0004553), Cellular Component: extracellular region (GO:0005576), Biological Process: carbohydrate metabolic process (GO:0005975), Molecular Function: carbohydrate binding (GO:0030246)
ZP_04319929.1	Bacillus cereus ATCC 10876	746	superfamily	SSF49265	Fibronectin type III	603	691	8.9e-16	IPR008957	Fibronectin, type III-like fold
ZP_04319929.1	Bacillus cereus ATCC 10876	746	superfamily	SSF51055	Carbohydrate binding domain	699	743	4.6e-07	IPR003610	Carbohydrate-binding family V/XII	Molecular Function: hydrolase activity, hydrolyzing O-glycosyl compounds (GO:0004553), Cellular Component: extracellular region (GO:0005576), Biological Process: carbohydrate metabolic process (GO:0005975), Molecular Function: carbohydrate binding (GO:0030246)
ZP_04319929.1	Bacillus cereus ATCC 10876	746	HMMSmart	SM00060	no description	606	679	2.7e-08	IPR003961	Fibronectin, type III
ZP_04319929.1	Bacillus cereus ATCC 10876	746	HMMSmart	SM00495	no description	697	743	0.00087	IPR003610	Carbohydrate-binding family V/XII	Molecular Function: hydrolase activity, hydrolyzing O-glycosyl compounds (GO:0004553), Cellular Component: extracellular region (GO:0005576), Biological Process: carbohydrate metabolic process (GO:0005975), Molecular Function: carbohydrate binding (GO:0030246)
ZP_04319929.1	Bacillus cereus ATCC 10876	746	ProfileScan	PS50853	FN3	606	690	13.842	IPR003961	Fibronectin, type III
ZP_04319929.1	Bacillus cereus ATCC 10876	746	HMMPfam	PF00041	fn3	606	683	7.9e-13	IPR003961	Fibronectin, type III
ZP_04320752.1	Bacillus cereus ATCC 10876	719	HMMPfam	PF00754	F5_F8_type_C	450	572	1.8e-34	IPR000421	Coagulation factor 5/8 type, C-terminal	Biological Process: cell adhesion (GO:0007155)
ZP_04320752.1	Bacillus cereus ATCC 10876	719	HMMPfam	PF00754	F5_F8_type_C	592	714	1.5e-31	IPR000421	Coagulation factor 5/8 type, C-terminal	Biological Process: cell adhesion (GO:0007155)
ZP_04320752.1	Bacillus cereus ATCC 10876	719	superfamily	SSF49785	Galactose-binding domain-like	424	575	1.2e-33	IPR008979	Galactose-binding like
ZP_04320752.1	Bacillus cereus ATCC 10876	719	superfamily	SSF49785	Galactose-binding domain-like	583	718	5.1e-32	IPR008979	Galactose-binding like
ZP_04320752.1	Bacillus cereus ATCC 10876	719	ProfileScan	PS50022	FA58C_3	435	577	22.756	IPR000421	Coagulation factor 5/8 type, C-terminal	Biological Process: cell adhesion (GO:0007155)
ZP_04320752.1	Bacillus cereus ATCC 10876	719	ProfileScan	PS50022	FA58C_3	578	719	18.578	IPR000421	Coagulation factor 5/8 type, C-terminal	Biological Process: cell adhesion (GO:0007155)
ZP_04286723.1	Bacillus cereus ATCC 4342	1458	HMMPfam	PF03272	Enhancin	1336	1425	1.7e-06	IPR004954	Peptidase M60, viral enhancin protein	Biological Process: viral reproduction (GO:0016032)
YP_002366602.1	Bacillus cereus B4264	591	superfamily	SSF49785	Galactose-binding domain-like	438	590	1.2e-33	IPR008979	Galactose-binding like
YP_002366602.1	Bacillus cereus B4264	591	ProfileScan	PS50022	FA58C_3	449	591	23.466	IPR000421	Coagulation factor 5/8 type, C-terminal	Biological Process: cell adhesion (GO:0007155)
YP_002366602.1	Bacillus cereus B4264	591	HMMPfam	PF00754	F5_F8_type_C	464	586	1.3e-32	IPR000421	Coagulation factor 5/8 type, C-terminal	Biological Process: cell adhesion (GO:0007155)
ZP_04262242.1	Bacillus cereus BDRD-ST196	748	HMMPfam	PF02839	CBM_5_12	699	735	9e-07	IPR003610	Carbohydrate-binding family V/XII	Molecular Function: hydrolase activity, hydrolyzing O-glycosyl compounds (GO:0004553), Cellular Component: extracellular region (GO:0005576), Biological Process: carbohydrate metabolic process (GO:0005975), Molecular Function: carbohydrate binding (GO:0030246)
ZP_04262242.1	Bacillus cereus BDRD-ST196	748	superfamily	SSF49265	Fibronectin type III	605	693	1.1e-14	IPR008957	Fibronectin, type III-like fold
ZP_04262242.1	Bacillus cereus BDRD-ST196	748	superfamily	SSF51055	Carbohydrate binding domain	701	745	4.3e-07	IPR003610	Carbohydrate-binding family V/XII	Molecular Function: hydrolase activity, hydrolyzing O-glycosyl compounds (GO:0004553), Cellular Component: extracellular region (GO:0005576), Biological Process: carbohydrate metabolic process (GO:0005975), Molecular Function: carbohydrate binding (GO:0030246)
ZP_04262242.1	Bacillus cereus BDRD-ST196	748	HMMSmart	SM00060	no description	608	681	1.2e-07	IPR003961	Fibronectin, type III
ZP_04262242.1	Bacillus cereus BDRD-ST196	748	HMMSmart	SM00495	no description	699	745	0.0013	IPR003610	Carbohydrate-binding family V/XII	Molecular Function: hydrolase activity, hydrolyzing O-glycosyl compounds (GO:0004553), Cellular Component: extracellular region (GO:0005576), Biological Process: carbohydrate metabolic process (GO:0005975), Molecular Function: carbohydrate binding (GO:0030246)
ZP_04262242.1	Bacillus cereus BDRD-ST196	748	ProfileScan	PS50853	FN3	608	692	13.795	IPR003961	Fibronectin, type III
ZP_04262242.1	Bacillus cereus BDRD-ST196	748	HMMPfam	PF00041	fn3	608	685	7.5e-13	IPR003961	Fibronectin, type III
ZP_04206946.1	Bacillus cereus F65185	772	HMMPfam	PF02839	CBM_5_12	723	759	4.2e-05	IPR003610	Carbohydrate-binding family V/XII	Molecular Function: hydrolase activity, hydrolyzing O-glycosyl compounds (GO:0004553), Cellular Component: extracellular region (GO:0005576), Biological Process: carbohydrate metabolic process (GO:0005975), Molecular Function: carbohydrate binding (GO:0030246)
ZP_04206946.1	Bacillus cereus F65185	772	HMMSmart	SM00060	no description	632	705	2.7e-08	IPR003961	Fibronectin, type III
ZP_04206946.1	Bacillus cereus F65185	772	HMMSmart	SM00495	no description	723	769	0.00087	IPR003610	Carbohydrate-binding family V/XII	Molecular Function: hydrolase activity, hydrolyzing O-glycosyl compounds (GO:0004553), Cellular Component: extracellular region (GO:0005576), Biological Process: carbohydrate metabolic process (GO:0005975), Molecular Function: carbohydrate binding (GO:0030246)
ZP_04206946.1	Bacillus cereus F65185	772	ProfileScan	PS50853	FN3	632	716	13.842	IPR003961	Fibronectin, type III
ZP_04206946.1	Bacillus cereus F65185	772	superfamily	SSF49265	Fibronectin type III	629	717	8.9e-16	IPR008957	Fibronectin, type III-like fold
ZP_04206946.1	Bacillus cereus F65185	772	superfamily	SSF51055	Carbohydrate binding domain	725	769	4.6e-07	IPR003610	Carbohydrate-binding family V/XII	Molecular Function: hydrolase activity, hydrolyzing O-glycosyl compounds (GO:0004553), Cellular Component: extracellular region (GO:0005576), Biological Process: carbohydrate metabolic process (GO:0005975), Molecular Function: carbohydrate binding (GO:0030246)
ZP_04206946.1	Bacillus cereus F65185	772	HMMPfam	PF00041	fn3	632	709	7.9e-13	IPR003961	Fibronectin, type III
ZP_04278345.1	Bacillus cereus m1550	577	HMMPfam	PF00754	F5_F8_type_C	450	572	2.4e-32	IPR000421	Coagulation factor 5/8 type, C-terminal	Biological Process: cell adhesion (GO:0007155)
ZP_04278345.1	Bacillus cereus m1550	577	superfamily	SSF49785	Galactose-binding domain-like	424	576	1.9e-33	IPR008979	Galactose-binding like
ZP_04278345.1	Bacillus cereus m1550	577	ProfileScan	PS50022	FA58C_3	435	577	23.466	IPR000421	Coagulation factor 5/8 type, C-terminal	Biological Process: cell adhesion (GO:0007155)
ZP_04300725.1	Bacillus cereus MM3	593	HMMPfam	PF00754	F5_F8_type_C	466	588	3.6e-31	IPR000421	Coagulation factor 5/8 type, C-terminal	Biological Process: cell adhesion (GO:0007155)
ZP_04300725.1	Bacillus cereus MM3	593	ProfileScan	PS50022	FA58C_3	449	593	23.931	IPR000421	Coagulation factor 5/8 type, C-terminal	Biological Process: cell adhesion (GO:0007155)
ZP_04300725.1	Bacillus cereus MM3	593	superfamily	SSF49785	Galactose-binding domain-like	438	592	2.6e-33	IPR008979	Galactose-binding like
ZP_04238966.1	Bacillus cereus Rock1-15	577	HMMPfam	PF00754	F5_F8_type_C	450	572	1.3e-32	IPR000421	Coagulation factor 5/8 type, C-terminal	Biological Process: cell adhesion (GO:0007155)
ZP_04238966.1	Bacillus cereus Rock1-15	577	superfamily	SSF49785	Galactose-binding domain-like	424	576	1.2e-33	IPR008979	Galactose-binding like
ZP_04238966.1	Bacillus cereus Rock1-15	577	ProfileScan	PS50022	FA58C_3	435	577	23.466	IPR000421	Coagulation factor 5/8 type, C-terminal	Biological Process: cell adhesion (GO:0007155)
ZP_04245415.1	Bacillus cereus Rock1-3	849	HMMPfam	PF03272	Enhancin	586	635	1.1e-05	IPR004954	Peptidase M60, viral enhancin protein	Biological Process: viral reproduction (GO:0016032)
ZP_04247877.1	Bacillus cereus Rock1-3	752	HMMPfam	PF07523	Big_3	455	524	5.8e-05	IPR011080	Bacterial Ig-like
ZP_04247877.1	Bacillus cereus Rock1-3	752	HMMPfam	PF07523	Big_3	538	607	0.031	IPR011080	Bacterial Ig-like
ZP_04247877.1	Bacillus cereus Rock1-3	752	PatternScan	PS00178	AA_TRNA_LIGASE_I	457	467	NA	IPR001412	Aminoacyl-tRNA synthetase, class I, conserved site	Molecular Function: nucleotide binding (GO:0000166), Molecular Function: aminoacyl-tRNA ligase activity (GO:0004812), Molecular Function: ATP binding (GO:0005524), Cellular Component: cytoplasm (GO:0005737), Biological Process: translation (GO:0006412), Biological Process: tRNA aminoacylation for protein translation (GO:0006418)
ZP_04248460.1	Bacillus cereus Rock1-3	612	HMMPfam	PF00754	F5_F8_type_C	475	601	1.7e-33	IPR000421	Coagulation factor 5/8 type, C-terminal	Biological Process: cell adhesion (GO:0007155)
ZP_04248460.1	Bacillus cereus Rock1-3	612	superfamily	SSF49785	Galactose-binding domain-like	451	604	6.6e-34	IPR008979	Galactose-binding like
ZP_04248460.1	Bacillus cereus Rock1-3	612	ProfileScan	PS50022	FA58C_3	462	606	23.658	IPR000421	Coagulation factor 5/8 type, C-terminal	Biological Process: cell adhesion (GO:0007155)
ZP_04248750.1	Bacillus cereus Rock1-3	1064	HMMPfam	PF07523	Big_3	462	532	2.1e-06	IPR011080	Bacterial Ig-like
ZP_04248750.1	Bacillus cereus Rock1-3	1064	HMMPfam	PF07523	Big_3	546	615	0.0049	IPR011080	Bacterial Ig-like
ZP_04248750.1	Bacillus cereus Rock1-3	1064	HMMPfam	PF07523	Big_3	795	864	0.0099	IPR011080	Bacterial Ig-like
ZP_04248750.1	Bacillus cereus Rock1-3	1064	superfamily	SSF49313	Cadherin-like	871	954	0.0035	IPR015919	Cadherin-like	Molecular Function: calcium ion binding (GO:0005509), Cellular Component: membrane (GO:0016020)
ZP_04248750.1	Bacillus cereus Rock1-3	1064	superfamily	SSF49313	Cadherin-like	539	615	0.0062	IPR015919	Cadherin-like	Molecular Function: calcium ion binding (GO:0005509), Cellular Component: membrane (GO:0016020)
ZP_04248750.1	Bacillus cereus Rock1-3	1064	HMMPfam	PF00746	Gram_pos_anchor	1021	1058	4.4e-08	IPR001899	Surface protein from Gram-positive cocci, anchor region	Cellular Component: cell surface (GO:0009986)
ZP_04233797.1	Bacillus cereus Rock3-28	748	HMMPfam	PF02839	CBM_5_12	699	735	0.00064	IPR003610	Carbohydrate-binding family V/XII	Molecular Function: hydrolase activity, hydrolyzing O-glycosyl compounds (GO:0004553), Cellular Component: extracellular region (GO:0005576), Biological Process: carbohydrate metabolic process (GO:0005975), Molecular Function: carbohydrate binding (GO:0030246)
ZP_04233797.1	Bacillus cereus Rock3-28	748	ProfileScan	PS50853	FN3	608	692	13.955	IPR003961	Fibronectin, type III
ZP_04233797.1	Bacillus cereus Rock3-28	748	HMMSmart	SM00060	no description	608	681	4.7e-08	IPR003961	Fibronectin, type III
ZP_04233797.1	Bacillus cereus Rock3-28	748	HMMSmart	SM00495	no description	699	745	0.001	IPR003610	Carbohydrate-binding family V/XII	Molecular Function: hydrolase activity, hydrolyzing O-glycosyl compounds (GO:0004553), Cellular Component: extracellular region (GO:0005576), Biological Process: carbohydrate metabolic process (GO:0005975), Molecular Function: carbohydrate binding (GO:0030246)
ZP_04233797.1	Bacillus cereus Rock3-28	748	superfamily	SSF49265	Fibronectin type III	605	693	2.1e-15	IPR008957	Fibronectin, type III-like fold
ZP_04233797.1	Bacillus cereus Rock3-28	748	superfamily	SSF51055	Carbohydrate binding domain	701	745	3.8e-06	IPR003610	Carbohydrate-binding family V/XII	Molecular Function: hydrolase activity, hydrolyzing O-glycosyl compounds (GO:0004553), Cellular Component: extracellular region (GO:0005576), Biological Process: carbohydrate metabolic process (GO:0005975), Molecular Function: carbohydrate binding (GO:0030246)
ZP_04233797.1	Bacillus cereus Rock3-28	748	HMMPfam	PF00041	fn3	608	685	2e-12	IPR003961	Fibronectin, type III
ZP_04236724.1	Bacillus cereus Rock3-28	764	HMMPfam	PF07523	Big_3	467	536	0.00065	IPR011080	Bacterial Ig-like
ZP_04236724.1	Bacillus cereus Rock3-28	764	HMMPfam	PF07523	Big_3	550	619	0.0062	IPR011080	Bacterial Ig-like
ZP_04237054.1	Bacillus cereus Rock3-28	612	HMMPfam	PF00754	F5_F8_type_C	475	601	1.7e-33	IPR000421	Coagulation factor 5/8 type, C-terminal	Biological Process: cell adhesion (GO:0007155)
ZP_04237054.1	Bacillus cereus Rock3-28	612	ProfileScan	PS50022	FA58C_3	462	606	23.658	IPR000421	Coagulation factor 5/8 type, C-terminal	Biological Process: cell adhesion (GO:0007155)
ZP_04237054.1	Bacillus cereus Rock3-28	612	superfamily	SSF49785	Galactose-binding domain-like	451	604	6.6e-34	IPR008979	Galactose-binding like
ZP_04228026.1	Bacillus cereus Rock3-29	869	HMMPfam	PF03272	Enhancin	606	655	1.1e-05	IPR004954	Peptidase M60, viral enhancin protein	Biological Process: viral reproduction (GO:0016032)
ZP_04231342.1	Bacillus cereus Rock3-29	752	HMMPfam	PF07523	Big_3	455	524	3.1e-05	IPR011080	Bacterial Ig-like
ZP_04231342.1	Bacillus cereus Rock3-29	752	HMMPfam	PF07523	Big_3	538	607	0.031	IPR011080	Bacterial Ig-like
ZP_04215346.1	Bacillus cereus Rock4-2	746	HMMPfam	PF02839	CBM_5_12	697	733	4.2e-05	IPR003610	Carbohydrate-binding family V/XII	Molecular Function: hydrolase activity, hydrolyzing O-glycosyl compounds (GO:0004553), Cellular Component: extracellular region (GO:0005576), Biological Process: carbohydrate metabolic process (GO:0005975), Molecular Function: carbohydrate binding (GO:0030246)
ZP_04215346.1	Bacillus cereus Rock4-2	746	HMMSmart	SM00060	no description	606	679	5.9e-08	IPR003961	Fibronectin, type III
ZP_04215346.1	Bacillus cereus Rock4-2	746	HMMSmart	SM00495	no description	697	743	0.00087	IPR003610	Carbohydrate-binding family V/XII	Molecular Function: hydrolase activity, hydrolyzing O-glycosyl compounds (GO:0004553), Cellular Component: extracellular region (GO:0005576), Biological Process: carbohydrate metabolic process (GO:0005975), Molecular Function: carbohydrate binding (GO:0030246)
ZP_04215346.1	Bacillus cereus Rock4-2	746	ProfileScan	PS50853	FN3	606	690	13.532	IPR003961	Fibronectin, type III
ZP_04215346.1	Bacillus cereus Rock4-2	746	superfamily	SSF49265	Fibronectin type III	603	691	1.5e-15	IPR008957	Fibronectin, type III-like fold
ZP_04215346.1	Bacillus cereus Rock4-2	746	superfamily	SSF51055	Carbohydrate binding domain	699	743	4.6e-07	IPR003610	Carbohydrate-binding family V/XII	Molecular Function: hydrolase activity, hydrolyzing O-glycosyl compounds (GO:0004553), Cellular Component: extracellular region (GO:0005576), Biological Process: carbohydrate metabolic process (GO:0005975), Molecular Function: carbohydrate binding (GO:0030246)
ZP_04215346.1	Bacillus cereus Rock4-2	746	HMMPfam	PF00041	fn3	606	683	4.9e-11	IPR003961	Fibronectin, type III
YP_001376651.1	Bacillus cereus subsp. cytotoxis NVH 391-98	876	ProfileScan	PS51272	SLH	759	814	0	IPR001119	S-layer homology region
YP_001376651.1	Bacillus cereus subsp. cytotoxis NVH 391-98	876	ProfileScan	PS51272	SLH	816	876	0	IPR001119	S-layer homology region
YP_001376651.1	Bacillus cereus subsp. cytotoxis NVH 391-98	876	ProfileScan	PS51272	SLH	695	758	0	IPR001119	S-layer homology region
YP_001376651.1	Bacillus cereus subsp. cytotoxis NVH 391-98	876	HMMPfam	PF00395	SLH	699	741	2.7e-05	IPR001119	S-layer homology region
YP_001376651.1	Bacillus cereus subsp. cytotoxis NVH 391-98	876	HMMPfam	PF00395	SLH	756	800	2.7e-05	IPR001119	S-layer homology region
YP_001376651.1	Bacillus cereus subsp. cytotoxis NVH 391-98	876	HMMPfam	PF00395	SLH	820	862	0.0078	IPR001119	S-layer homology region
ZP_04168944.1	Bacillus mycoides DSM 2048	735	HMMPfam	PF03272	Enhancin	472	521	5.9e-06	IPR004954	Peptidase M60, viral enhancin protein	Biological Process: viral reproduction (GO:0016032)
ZP_04168944.1	Bacillus mycoides DSM 2048	735	HMMPfam	PF03272	Enhancin	606	655	4.1e-06	IPR004954	Peptidase M60, viral enhancin protein	Biological Process: viral reproduction (GO:0016032)
ZP_04171806.1	Bacillus mycoides DSM 2048	728	HMMPfam	PF03272	Enhancin	452	501	7.9e-07	IPR004954	Peptidase M60, viral enhancin protein	Biological Process: viral reproduction (GO:0016032)
ZP_04171806.1	Bacillus mycoides DSM 2048	728	HMMPfam	PF02839	CBM_5_12	679	715	3.4e-05	IPR003610	Carbohydrate-binding family V/XII	Molecular Function: hydrolase activity, hydrolyzing O-glycosyl compounds (GO:0004553), Cellular Component: extracellular region (GO:0005576), Biological Process: carbohydrate metabolic process (GO:0005975), Molecular Function: carbohydrate binding (GO:0030246)
ZP_04171806.1	Bacillus mycoides DSM 2048	728	superfamily	SSF49265	Fibronectin type III	585	673	3.4e-15	IPR008957	Fibronectin, type III-like fold
ZP_04171806.1	Bacillus mycoides DSM 2048	728	superfamily	SSF51055	Carbohydrate binding domain	681	725	4.5e-07	IPR003610	Carbohydrate-binding family V/XII	Molecular Function: hydrolase activity, hydrolyzing O-glycosyl compounds (GO:0004553), Cellular Component: extracellular region (GO:0005576), Biological Process: carbohydrate metabolic process (GO:0005975), Molecular Function: carbohydrate binding (GO:0030246)
ZP_04171806.1	Bacillus mycoides DSM 2048	728	HMMSmart	SM00060	no description	588	661	7.5e-09	IPR003961	Fibronectin, type III
ZP_04171806.1	Bacillus mycoides DSM 2048	728	HMMSmart	SM00495	no description	679	725	0.00018	IPR003610	Carbohydrate-binding family V/XII	Molecular Function: hydrolase activity, hydrolyzing O-glycosyl compounds (GO:0004553), Cellular Component: extracellular region (GO:0005576), Biological Process: carbohydrate metabolic process (GO:0005975), Molecular Function: carbohydrate binding (GO:0030246)
ZP_04171806.1	Bacillus mycoides DSM 2048	728	ProfileScan	PS50853	FN3	588	672	13.96	IPR003961	Fibronectin, type III
ZP_04171806.1	Bacillus mycoides DSM 2048	728	HMMPfam	PF00041	fn3	588	665	2.8e-13	IPR003961	Fibronectin, type III
ZP_04154891.1	Bacillus pseudomycoides DSM 12442	823	HMMPfam	PF05738	Cna_B	602	670	3.4e-13	IPR008454	Collagen-binding surface protein Cna-like, B region
ZP_04154891.1	Bacillus pseudomycoides DSM 12442	823	superfamily	SSF49464	Carboxypeptidase regulatory domain	594	691	1.2e-08	IPR008969	Carboxypeptidase-like, regulatory region
ZP_04154891.1	Bacillus pseudomycoides DSM 12442	823	HMMPfam	PF00746	Gram_pos_anchor	783	821	8.8e-08	IPR001899	Surface protein from Gram-positive cocci, anchor region	Cellular Component: cell surface (GO:0009986)
ZP_04140386.1	Bacillus thuringiensis Bt407	746	HMMPfam	PF03272	Enhancin	470	519	6.2e-06	IPR004954	Peptidase M60, viral enhancin protein	Biological Process: viral reproduction (GO:0016032)
ZP_04140386.1	Bacillus thuringiensis Bt407	746	HMMPfam	PF02839	CBM_5_12	697	733	4.2e-05	IPR003610	Carbohydrate-binding family V/XII	Molecular Function: hydrolase activity, hydrolyzing O-glycosyl compounds (GO:0004553), Cellular Component: extracellular region (GO:0005576), Biological Process: carbohydrate metabolic process (GO:0005975), Molecular Function: carbohydrate binding (GO:0030246)
ZP_04140386.1	Bacillus thuringiensis Bt407	746	superfamily	SSF49265	Fibronectin type III	603	691	1.2e-14	IPR008957	Fibronectin, type III-like fold
ZP_04140386.1	Bacillus thuringiensis Bt407	746	superfamily	SSF51055	Carbohydrate binding domain	699	743	5.4e-07	IPR003610	Carbohydrate-binding family V/XII	Molecular Function: hydrolase activity, hydrolyzing O-glycosyl compounds (GO:0004553), Cellular Component: extracellular region (GO:0005576), Biological Process: carbohydrate metabolic process (GO:0005975), Molecular Function: carbohydrate binding (GO:0030246)
ZP_04140386.1	Bacillus thuringiensis Bt407	746	HMMSmart	SM00060	no description	606	679	6.4e-08	IPR003961	Fibronectin, type III
ZP_04140386.1	Bacillus thuringiensis Bt407	746	HMMSmart	SM00495	no description	697	743	0.00037	IPR003610	Carbohydrate-binding family V/XII	Molecular Function: hydrolase activity, hydrolyzing O-glycosyl compounds (GO:0004553), Cellular Component: extracellular region (GO:0005576), Biological Process: carbohydrate metabolic process (GO:0005975), Molecular Function: carbohydrate binding (GO:0030246)
ZP_04140386.1	Bacillus thuringiensis Bt407	746	ProfileScan	PS50853	FN3	606	690	13.692	IPR003961	Fibronectin, type III
ZP_04140386.1	Bacillus thuringiensis Bt407	746	HMMPfam	PF00041	fn3	606	683	2.1e-12	IPR003961	Fibronectin, type III
ZP_04071470.1	Bacillus thuringiensis IBL 200	577	ProfileScan	PS50022	FA58C_3	435	577	23.494	IPR000421	Coagulation factor 5/8 type, C-terminal	Biological Process: cell adhesion (GO:0007155)
ZP_04071470.1	Bacillus thuringiensis IBL 200	577	superfamily	SSF49785	Galactose-binding domain-like	424	576	9.9e-34	IPR008979	Galactose-binding like
ZP_04071470.1	Bacillus thuringiensis IBL 200	577	HMMPfam	PF00754	F5_F8_type_C	450	572	1.2e-32	IPR000421	Coagulation factor 5/8 type, C-terminal	Biological Process: cell adhesion (GO:0007155)
ZP_04101632.1	Bacillus thuringiensis serovar berliner ATCC 10792	337	ProfileScan	PS50022	FA58C_3	195	337	23.466	IPR000421	Coagulation factor 5/8 type, C-terminal	Biological Process: cell adhesion (GO:0007155)
ZP_04101632.1	Bacillus thuringiensis serovar berliner ATCC 10792	337	superfamily	SSF49785	Galactose-binding domain-like	184	336	1.2e-33	IPR008979	Galactose-binding like
ZP_04101632.1	Bacillus thuringiensis serovar berliner ATCC 10792	337	HMMPfam	PF00754	F5_F8_type_C	210	332	1.3e-32	IPR000421	Coagulation factor 5/8 type, C-terminal	Biological Process: cell adhesion (GO:0007155)
ZP_04105302.1	Bacillus thuringiensis serovar berliner ATCC 10792	479	ProfileScan	PS50022	FA58C_3	195	337	22.811	IPR000421	Coagulation factor 5/8 type, C-terminal	Biological Process: cell adhesion (GO:0007155)
ZP_04105302.1	Bacillus thuringiensis serovar berliner ATCC 10792	479	ProfileScan	PS50022	FA58C_3	340	479	18.688	IPR000421	Coagulation factor 5/8 type, C-terminal	Biological Process: cell adhesion (GO:0007155)
ZP_04105302.1	Bacillus thuringiensis serovar berliner ATCC 10792	479	superfamily	SSF49785	Galactose-binding domain-like	184	335	1.4e-33	IPR008979	Galactose-binding like
ZP_04105302.1	Bacillus thuringiensis serovar berliner ATCC 10792	479	superfamily	SSF49785	Galactose-binding domain-like	343	478	6.5e-33	IPR008979	Galactose-binding like
ZP_04105302.1	Bacillus thuringiensis serovar berliner ATCC 10792	479	HMMPfam	PF00754	F5_F8_type_C	210	332	6.1e-34	IPR000421	Coagulation factor 5/8 type, C-terminal	Biological Process: cell adhesion (GO:0007155)
ZP_04105302.1	Bacillus thuringiensis serovar berliner ATCC 10792	479	HMMPfam	PF00754	F5_F8_type_C	352	474	3.9e-33	IPR000421	Coagulation factor 5/8 type, C-terminal	Biological Process: cell adhesion (GO:0007155)
ZP_04087070.1	Bacillus thuringiensis serovar huazhongensis BGSC 4BD1	1286	PatternScan	PS00189	LIPOYL	517	546	NA	IPR003016	2-oxo acid dehydrogenase, lipoyl-binding site
ZP_00738692.1	Bacillus thuringiensis serovar israelensis ATCC 35	733	HMMPfam	PF00041	fn3	592	669	3.9e-10	IPR003961	Fibronectin, type III
ZP_00738692.1	Bacillus thuringiensis serovar israelensis ATCC 35	733	HMMSmart	SM00495	ChtBD3	683	729	0.00024	IPR003610	Carbohydrate-binding family V/XII	Molecular Function: hydrolase activity, hydrolyzing O-glycosyl compounds (GO:0004553), Cellular Component: extracellular region (GO:0005576), Biological Process: carbohydrate metabolic process (GO:0005975), Molecular Function: carbohydrate binding (GO:0030246)
ZP_00738692.1	Bacillus thuringiensis serovar israelensis ATCC 35	733	HMMSmart	SM00060	FN3	592	665	4e-09	IPR003961	Fibronectin, type III
ZP_00738692.1	Bacillus thuringiensis serovar israelensis ATCC 35	733	superfamily	SSF51055	CBM_5_12	685	729	6.3e-07	IPR003610	Carbohydrate-binding family V/XII	Molecular Function: hydrolase activity, hydrolyzing O-glycosyl compounds (GO:0004553), Cellular Component: extracellular region (GO:0005576), Biological Process: carbohydrate metabolic process (GO:0005975), Molecular Function: carbohydrate binding (GO:0030246)
ZP_00738692.1	Bacillus thuringiensis serovar israelensis ATCC 35	733	superfamily	SSF49265	FN_III-like	589	677	1.9e-15	IPR008957	Fibronectin, type III-like fold
ZP_00738692.1	Bacillus thuringiensis serovar israelensis ATCC 35	733	ProfileScan	PS50853	FN3	592	676	0	IPR003961	Fibronectin, type III
ZP_00738692.1	Bacillus thuringiensis serovar israelensis ATCC 35	733	PatternScan	PS00678	WD_REPEATS_1	423	437	0	IPR001680	WD40 repeat
ZP_00738692.1	Bacillus thuringiensis serovar israelensis ATCC 35	733	HMMPfam	PF03272	Enhancin	462	505	0.029	IPR004954	Peptidase M60, viral enhancin protein	Biological Process: viral reproduction (GO:0016032)
ZP_00738692.1	Bacillus thuringiensis serovar israelensis ATCC 35	733	HMMPfam	PF02839	CBM_5_12	683	719	0.17	IPR003610	Carbohydrate-binding family V/XII	Molecular Function: hydrolase activity, hydrolyzing O-glycosyl compounds (GO:0004553), Cellular Component: extracellular region (GO:0005576), Biological Process: carbohydrate metabolic process (GO:0005975), Molecular Function: carbohydrate binding (GO:0030246)
ZP_00739797.1	Bacillus thuringiensis serovar israelensis ATCC 35	746	HMMPfam	PF00041	fn3	606	683	1.7e-09	IPR003961	Fibronectin, type III
ZP_00739797.1	Bacillus thuringiensis serovar israelensis ATCC 35	746	HMMSmart	SM00495	ChtBD3	697	743	0.00095	IPR003610	Carbohydrate-binding family V/XII	Molecular Function: hydrolase activity, hydrolyzing O-glycosyl compounds (GO:0004553), Cellular Component: extracellular region (GO:0005576), Biological Process: carbohydrate metabolic process (GO:0005975), Molecular Function: carbohydrate binding (GO:0030246)
ZP_00739797.1	Bacillus thuringiensis serovar israelensis ATCC 35	746	HMMSmart	SM00060	FN3	606	679	2e-08	IPR003961	Fibronectin, type III
ZP_00739797.1	Bacillus thuringiensis serovar israelensis ATCC 35	746	superfamily	SSF51055	CBM_5_12	699	743	3.9e-07	IPR003610	Carbohydrate-binding family V/XII	Molecular Function: hydrolase activity, hydrolyzing O-glycosyl compounds (GO:0004553), Cellular Component: extracellular region (GO:0005576), Biological Process: carbohydrate metabolic process (GO:0005975), Molecular Function: carbohydrate binding (GO:0030246)
ZP_00739797.1	Bacillus thuringiensis serovar israelensis ATCC 35	746	superfamily	SSF49265	FN_III-like	603	691	8.9e-16	IPR008957	Fibronectin, type III-like fold
ZP_00739797.1	Bacillus thuringiensis serovar israelensis ATCC 35	746	ProfileScan	PS50853	FN3	606	690	0	IPR003961	Fibronectin, type III
ZP_00739797.1	Bacillus thuringiensis serovar israelensis ATCC 35	746	HMMPfam	PF03272	Enhancin	470	519	0.021	IPR004954	Peptidase M60, viral enhancin protein	Biological Process: viral reproduction (GO:0016032)
ZP_00739797.1	Bacillus thuringiensis serovar israelensis ATCC 35	746	HMMPfam	PF02839	CBM_5_12	697	733	0.0048	IPR003610	Carbohydrate-binding family V/XII	Molecular Function: hydrolase activity, hydrolyzing O-glycosyl compounds (GO:0004553), Cellular Component: extracellular region (GO:0005576), Biological Process: carbohydrate metabolic process (GO:0005975), Molecular Function: carbohydrate binding (GO:0030246)
ZP_04117796.1	Bacillus thuringiensis serovar kurstaki str. T03a001	726	HMMPfam	PF02839	CBM_5_12	677	713	4.2e-05	IPR003610	Carbohydrate-binding family V/XII	Molecular Function: hydrolase activity, hydrolyzing O-glycosyl compounds (GO:0004553), Cellular Component: extracellular region (GO:0005576), Biological Process: carbohydrate metabolic process (GO:0005975), Molecular Function: carbohydrate binding (GO:0030246)
ZP_04117796.1	Bacillus thuringiensis serovar kurstaki str. T03a001	726	HMMSmart	SM00060	no description	586	659	2.7e-08	IPR003961	Fibronectin, type III
ZP_04117796.1	Bacillus thuringiensis serovar kurstaki str. T03a001	726	HMMSmart	SM00495	no description	677	723	0.00087	IPR003610	Carbohydrate-binding family V/XII	Molecular Function: hydrolase activity, hydrolyzing O-glycosyl compounds (GO:0004553), Cellular Component: extracellular region (GO:0005576), Biological Process: carbohydrate metabolic process (GO:0005975), Molecular Function: carbohydrate binding (GO:0030246)
ZP_04117796.1	Bacillus thuringiensis serovar kurstaki str. T03a001	726	ProfileScan	PS50853	FN3	586	670	13.842	IPR003961	Fibronectin, type III
ZP_04117796.1	Bacillus thuringiensis serovar kurstaki str. T03a001	726	superfamily	SSF49265	Fibronectin type III	583	671	8.9e-16	IPR008957	Fibronectin, type III-like fold
ZP_04117796.1	Bacillus thuringiensis serovar kurstaki str. T03a001	726	superfamily	SSF51055	Carbohydrate binding domain	679	723	4.6e-07	IPR003610	Carbohydrate-binding family V/XII	Molecular Function: hydrolase activity, hydrolyzing O-glycosyl compounds (GO:0004553), Cellular Component: extracellular region (GO:0005576), Biological Process: carbohydrate metabolic process (GO:0005975), Molecular Function: carbohydrate binding (GO:0030246)
ZP_04117796.1	Bacillus thuringiensis serovar kurstaki str. T03a001	726	HMMPfam	PF00041	fn3	586	663	7.9e-13	IPR003961	Fibronectin, type III
ZP_04111485.1	Bacillus thuringiensis serovar monterrey BGSC 4AJ1	746	HMMPfam	PF02839	CBM_5_12	697	733	0.00016	IPR003610	Carbohydrate-binding family V/XII	Molecular Function: hydrolase activity, hydrolyzing O-glycosyl compounds (GO:0004553), Cellular Component: extracellular region (GO:0005576), Biological Process: carbohydrate metabolic process (GO:0005975), Molecular Function: carbohydrate binding (GO:0030246)
ZP_04111485.1	Bacillus thuringiensis serovar monterrey BGSC 4AJ1	746	HMMSmart	SM00060	no description	606	679	1.5e-09	IPR003961	Fibronectin, type III
ZP_04111485.1	Bacillus thuringiensis serovar monterrey BGSC 4AJ1	746	HMMSmart	SM00495	no description	697	743	0.00025	IPR003610	Carbohydrate-binding family V/XII	Molecular Function: hydrolase activity, hydrolyzing O-glycosyl compounds (GO:0004553), Cellular Component: extracellular region (GO:0005576), Biological Process: carbohydrate metabolic process (GO:0005975), Molecular Function: carbohydrate binding (GO:0030246)
ZP_04111485.1	Bacillus thuringiensis serovar monterrey BGSC 4AJ1	746	ProfileScan	PS50853	FN3	606	690	14.333	IPR003961	Fibronectin, type III
ZP_04111485.1	Bacillus thuringiensis serovar monterrey BGSC 4AJ1	746	superfamily	SSF49265	Fibronectin type III	603	691	8.7e-16	IPR008957	Fibronectin, type III-like fold
ZP_04111485.1	Bacillus thuringiensis serovar monterrey BGSC 4AJ1	746	superfamily	SSF51055	Carbohydrate binding domain	699	743	2.7e-07	IPR003610	Carbohydrate-binding family V/XII	Molecular Function: hydrolase activity, hydrolyzing O-glycosyl compounds (GO:0004553), Cellular Component: extracellular region (GO:0005576), Biological Process: carbohydrate metabolic process (GO:0005975), Molecular Function: carbohydrate binding (GO:0030246)
ZP_04111485.1	Bacillus thuringiensis serovar monterrey BGSC 4AJ1	746	HMMPfam	PF00041	fn3	606	683	6.4e-14	IPR003961	Fibronectin, type III
ZP_04112386.1	Bacillus thuringiensis serovar monterrey BGSC 4AJ1	746	HMMPfam	PF02839	CBM_5_12	696	732	3e-05	IPR003610	Carbohydrate-binding family V/XII	Molecular Function: hydrolase activity, hydrolyzing O-glycosyl compounds (GO:0004553), Cellular Component: extracellular region (GO:0005576), Biological Process: carbohydrate metabolic process (GO:0005975), Molecular Function: carbohydrate binding (GO:0030246)
ZP_04112386.1	Bacillus thuringiensis serovar monterrey BGSC 4AJ1	746	HMMSmart	SM00060	no description	605	678	1.3e-08	IPR003961	Fibronectin, type III
ZP_04112386.1	Bacillus thuringiensis serovar monterrey BGSC 4AJ1	746	HMMSmart	SM00495	no description	696	742	0.0011	IPR003610	Carbohydrate-binding family V/XII	Molecular Function: hydrolase activity, hydrolyzing O-glycosyl compounds (GO:0004553), Cellular Component: extracellular region (GO:0005576), Biological Process: carbohydrate metabolic process (GO:0005975), Molecular Function: carbohydrate binding (GO:0030246)
ZP_04112386.1	Bacillus thuringiensis serovar monterrey BGSC 4AJ1	746	PatternScan	PS00678	WD_REPEATS_1	436	450	NA	IPR001680	WD40 repeat
ZP_04112386.1	Bacillus thuringiensis serovar monterrey BGSC 4AJ1	746	ProfileScan	PS50853	FN3	605	689	13.814	IPR003961	Fibronectin, type III
ZP_04112386.1	Bacillus thuringiensis serovar monterrey BGSC 4AJ1	746	superfamily	SSF49265	Fibronectin type III	602	690	4.3e-15	IPR008957	Fibronectin, type III-like fold
ZP_04112386.1	Bacillus thuringiensis serovar monterrey BGSC 4AJ1	746	superfamily	SSF51055	Carbohydrate binding domain	698	742	4e-07	IPR003610	Carbohydrate-binding family V/XII	Molecular Function: hydrolase activity, hydrolyzing O-glycosyl compounds (GO:0004553), Cellular Component: extracellular region (GO:0005576), Biological Process: carbohydrate metabolic process (GO:0005975), Molecular Function: carbohydrate binding (GO:0030246)
ZP_04112386.1	Bacillus thuringiensis serovar monterrey BGSC 4AJ1	746	HMMPfam	PF00041	fn3	605	682	3.2e-13	IPR003961	Fibronectin, type III
ZP_04136244.1	Bacillus thuringiensis serovar thuringiensis str. T01001	449	ProfileScan	PS50022	FA58C_3	165	307	22.811	IPR000421	Coagulation factor 5/8 type, C-terminal	Biological Process: cell adhesion (GO:0007155)
ZP_04136244.1	Bacillus thuringiensis serovar thuringiensis str. T01001	449	ProfileScan	PS50022	FA58C_3	310	449	18.688	IPR000421	Coagulation factor 5/8 type, C-terminal	Biological Process: cell adhesion (GO:0007155)
ZP_04136244.1	Bacillus thuringiensis serovar thuringiensis str. T01001	449	superfamily	SSF49785	Galactose-binding domain-like	154	305	1.4e-33	IPR008979	Galactose-binding like
ZP_04136244.1	Bacillus thuringiensis serovar thuringiensis str. T01001	449	superfamily	SSF49785	Galactose-binding domain-like	313	448	6.5e-33	IPR008979	Galactose-binding like
ZP_04136244.1	Bacillus thuringiensis serovar thuringiensis str. T01001	449	HMMPfam	PF00754	F5_F8_type_C	180	302	6.1e-34	IPR000421	Coagulation factor 5/8 type, C-terminal	Biological Process: cell adhesion (GO:0007155)
ZP_04136244.1	Bacillus thuringiensis serovar thuringiensis str. T01001	449	HMMPfam	PF00754	F5_F8_type_C	322	444	3.9e-33	IPR000421	Coagulation factor 5/8 type, C-terminal	Biological Process: cell adhesion (GO:0007155)
YP_001642566.1	Bacillus weihenstephanensis KBAB4	749	HMMPfam	PF00041	fn3	609	686	1.4e-11	IPR003961	Fibronectin, type III
YP_001642566.1	Bacillus weihenstephanensis KBAB4	749	HMMSmart	SM00060	FN3	609	682	3.1e-12	IPR003961	Fibronectin, type III
YP_001642566.1	Bacillus weihenstephanensis KBAB4	749	superfamily	SSF51055	CBM_5_12	702	746	3.6e-07	IPR003610	Carbohydrate-binding family V/XII	Molecular Function: hydrolase activity, hydrolyzing O-glycosyl compounds (GO:0004553), Cellular Component: extracellular region (GO:0005576), Biological Process: carbohydrate metabolic process (GO:0005975), Molecular Function: carbohydrate binding (GO:0030246)
YP_001642566.1	Bacillus weihenstephanensis KBAB4	749	superfamily	SSF49265	FN_III-like	606	694	3.1e-16	IPR008957	Fibronectin, type III-like fold
YP_001642566.1	Bacillus weihenstephanensis KBAB4	749	ProfileScan	PS50853	FN3	609	693	0	IPR003961	Fibronectin, type III
YP_001642566.1	Bacillus weihenstephanensis KBAB4	749	HMMSmart	SM00495	ChtBD3	700	746	2.3e-06	IPR003610	Carbohydrate-binding family V/XII	Molecular Function: hydrolase activity, hydrolyzing O-glycosyl compounds (GO:0004553), Cellular Component: extracellular region (GO:0005576), Biological Process: carbohydrate metabolic process (GO:0005975), Molecular Function: carbohydrate binding (GO:0030246)
YP_001642566.1	Bacillus weihenstephanensis KBAB4	749	HMMPfam	PF02839	CBM_5_12	700	736	0.2	IPR003610	Carbohydrate-binding family V/XII	Molecular Function: hydrolase activity, hydrolyzing O-glycosyl compounds (GO:0004553), Cellular Component: extracellular region (GO:0005576), Biological Process: carbohydrate metabolic process (GO:0005975), Molecular Function: carbohydrate binding (GO:0030246)
ZP_01958589.1	Bacteroides caccae ATCC 43185	977	superfamily	SSF49785	Gal_bind_like	213	375	4.1e-09	IPR008979	Galactose-binding like
ZP_01958589.1	Bacteroides caccae ATCC 43185	977	ProfileScan	PS51257	PROKAR_LIPOPROTEIN	1	25	0	NULL	NULL
ZP_01959638.1	Bacteroides caccae ATCC 43185	800	superfamily	SSF49785	Gal_bind_like	119	284	5.5e-13	IPR008979	Galactose-binding like
ZP_01959638.1	Bacteroides caccae ATCC 43185	800	ProfileScan	PS51257	PROKAR_LIPOPROTEIN	1	32	0	NULL	NULL
ZP_01959638.1	Bacteroides caccae ATCC 43185	800	HMMPfam	PF00754	F5_F8_type_C	147	281	1.5e-07	IPR000421	Coagulation factor 5/8 type, C-terminal	Biological Process: cell adhesion (GO:0007155)
ZP_01959759.1	Bacteroides caccae ATCC 43185	937	superfamily	SSF49785	Gal_bind_like	245	374	9.6e-16	IPR008979	Galactose-binding like
ZP_01959759.1	Bacteroides caccae ATCC 43185	937	HMMPfam	PF00754	F5_F8_type_C	236	367	3.7e-05	IPR000421	Coagulation factor 5/8 type, C-terminal	Biological Process: cell adhesion (GO:0007155)
ZP_01959767.1	Bacteroides caccae ATCC 43185	558	PatternScan	PS00430	TONB_DEPENDENT_REC_1	1	69	0	IPR010916	TonB box, conserved site
ZP_01959768.1	Bacteroides caccae ATCC 43185	973	ProfileScan	PS51257	PROKAR_LIPOPROTEIN	1	19	0	NULL	NULL
ZP_01959885.1	Bacteroides caccae ATCC 43185	959	superfamily	SSF49785	Gal_bind_like	228	391	1.1e-12	IPR008979	Galactose-binding like
ZP_01959885.1	Bacteroides caccae ATCC 43185	959	HMMPfam	PF00754	F5_F8_type_C	249	384	0.044	IPR000421	Coagulation factor 5/8 type, C-terminal	Biological Process: cell adhesion (GO:0007155)
ZP_01959886.1	Bacteroides caccae ATCC 43185	510	PatternScan	PS00142	ZINC_PROTEASE	323	332	0	NULL	NULL
ZP_01960170.1	Bacteroides caccae ATCC 43185	951	superfamily	SSF49785	Gal_bind_like	205	359	8.4e-19	IPR008979	Galactose-binding like
ZP_01960170.1	Bacteroides caccae ATCC 43185	951	ProfileScan	PS51257	PROKAR_LIPOPROTEIN	1	23	0	NULL	NULL
ZP_01960170.1	Bacteroides caccae ATCC 43185	951	HMMPfam	PF00754	F5_F8_type_C	231	356	1.6e-09	IPR000421	Coagulation factor 5/8 type, C-terminal	Biological Process: cell adhesion (GO:0007155)
ZP_01960228.1	Bacteroides caccae ATCC 43185	799	superfamily	SSF49785	Gal_bind_like	33	194	2.2e-20	IPR008979	Galactose-binding like
ZP_01960228.1	Bacteroides caccae ATCC 43185	799	ProfileScan	PS51257	PROKAR_LIPOPROTEIN	1	23	0	NULL	NULL
ZP_01960228.1	Bacteroides caccae ATCC 43185	799	HMMPfam	PF00754	F5_F8_type_C	59	187	2.3e-08	IPR000421	Coagulation factor 5/8 type, C-terminal	Biological Process: cell adhesion (GO:0007155)
ZP_01960229.1	Bacteroides caccae ATCC 43185	886	superfamily	SSF49785	Gal_bind_like	110	269	1e-12	IPR008979	Galactose-binding like
ZP_01960229.1	Bacteroides caccae ATCC 43185	886	HMMPfam	PF00754	F5_F8_type_C	134	266	1.7e-06	IPR000421	Coagulation factor 5/8 type, C-terminal	Biological Process: cell adhesion (GO:0007155)
ZP_01960238.1	Bacteroides caccae ATCC 43185	958	superfamily	SSF49785	Gal_bind_like	205	366	9.7e-35	IPR008979	Galactose-binding like
ZP_01960238.1	Bacteroides caccae ATCC 43185	958	ProfileScan	PS50022	FA58C_3	222	364	0	IPR000421	Coagulation factor 5/8 type, C-terminal	Biological Process: cell adhesion (GO:0007155)
ZP_01960238.1	Bacteroides caccae ATCC 43185	958	ProfileScan	PS51257	PROKAR_LIPOPROTEIN	1	20	0	NULL	NULL
ZP_01960238.1	Bacteroides caccae ATCC 43185	958	HMMPfam	PF00754	F5_F8_type_C	231	359	3.4e-26	IPR000421	Coagulation factor 5/8 type, C-terminal	Biological Process: cell adhesion (GO:0007155)
ZP_01960247.1	Bacteroides caccae ATCC 43185	956	superfamily	SSF49785	Gal_bind_like	211	372	1.1e-28	IPR008979	Galactose-binding like
ZP_01960247.1	Bacteroides caccae ATCC 43185	956	ProfileScan	PS50022	FA58C_3	211	370	0	IPR000421	Coagulation factor 5/8 type, C-terminal	Biological Process: cell adhesion (GO:0007155)
ZP_01960247.1	Bacteroides caccae ATCC 43185	956	ProfileScan	PS51257	PROKAR_LIPOPROTEIN	1	25	0	NULL	NULL
ZP_01960247.1	Bacteroides caccae ATCC 43185	956	PatternScan	PS00678	WD_REPEATS_1	708	722	0	IPR001680	WD40 repeat
ZP_01960247.1	Bacteroides caccae ATCC 43185	956	HMMPfam	PF00754	F5_F8_type_C	237	365	6e-21	IPR000421	Coagulation factor 5/8 type, C-terminal	Biological Process: cell adhesion (GO:0007155)
ZP_01960954.1	Bacteroides caccae ATCC 43185	796	superfamily	SSF49785	Gal_bind_like	49	208	6.1e-15	IPR008979	Galactose-binding like
ZP_01960954.1	Bacteroides caccae ATCC 43185	796	HMMPfam	PF00754	F5_F8_type_C	75	201	0.34	IPR000421	Coagulation factor 5/8 type, C-terminal	Biological Process: cell adhesion (GO:0007155)
ZP_01961267.1	Bacteroides caccae ATCC 43185	954	superfamily	SSF49785	Gal_bind_like	214	371	1.9e-16	IPR008979	Galactose-binding like
ZP_01961267.1	Bacteroides caccae ATCC 43185	954	ProfileScan	PS51257	PROKAR_LIPOPROTEIN	1	28	0	NULL	NULL
ZP_01961832.1	Bacteroides caccae ATCC 43185	857	superfamily	SSF49785	Gal_bind_like	107	268	3e-13	IPR008979	Galactose-binding like
ZP_01961967.1	Bacteroides caccae ATCC 43185	952	superfamily	SSF49785	Gal_bind_like	216	371	7.6e-14	IPR008979	Galactose-binding like
ZP_01961967.1	Bacteroides caccae ATCC 43185	952	ProfileScan	PS51257	PROKAR_LIPOPROTEIN	1	27	0	NULL	NULL
ZP_02035877.1	Bacteroides capillosus ATCC 29799	1622	HMMPfam	PF00041	fn3	393	471	8.3e-06	IPR003961	Fibronectin, type III
ZP_02035877.1	Bacteroides capillosus ATCC 29799	1622	HMMPfam	PF00041	fn3	484	563	2.7e-11	IPR003961	Fibronectin, type III
ZP_02035877.1	Bacteroides capillosus ATCC 29799	1622	superfamily	SSF49785	Gal_bind_like	616	728	1.3e-09	IPR008979	Galactose-binding like
ZP_02035877.1	Bacteroides capillosus ATCC 29799	1622	superfamily	SSF63446	Cellulos_enz_dockerin_1	174	223	6.7e-06	IPR016134	Cellulosome enzyme, dockerin type I	Biological Process: polysaccharide catabolic process (GO:0000272)
ZP_02035877.1	Bacteroides capillosus ATCC 29799	1622	PatternScan	PS00018	EF_HAND_1	204	216	0	IPR018247	EF-HAND 1
ZP_02035877.1	Bacteroides capillosus ATCC 29799	1622	HMMSmart	SM00060	FN3	484	560	1.2e-13	IPR003961	Fibronectin, type III
ZP_02035877.1	Bacteroides capillosus ATCC 29799	1622	HMMSmart	SM00060	FN3	394	468	1.2e-08	IPR003961	Fibronectin, type III
ZP_02035877.1	Bacteroides capillosus ATCC 29799	1622	superfamily	SSF49265	FN_III-like	477	579	8.8e-17	IPR008957	Fibronectin, type III-like fold
ZP_02035877.1	Bacteroides capillosus ATCC 29799	1622	superfamily	SSF49265	FN_III-like	408	497	5.1e-11	IPR008957	Fibronectin, type III-like fold
ZP_02035877.1	Bacteroides capillosus ATCC 29799	1622	PatternScan	PS00142	ZINC_PROTEASE	1088	1097	0	NULL	NULL
ZP_02035877.1	Bacteroides capillosus ATCC 29799	1622	ProfileScan	PS50853	FN3	393	477	0	IPR003961	Fibronectin, type III
ZP_02035877.1	Bacteroides capillosus ATCC 29799	1622	ProfileScan	PS50853	FN3	1253	1338	0	IPR003961	Fibronectin, type III
ZP_02035877.1	Bacteroides capillosus ATCC 29799	1622	ProfileScan	PS50853	FN3	484	570	0	IPR003961	Fibronectin, type III
ZP_05415629.1	Bacteroides finegoldii DSM 17565	705	superfamily	SSF49785	Gal_bind_like	511	672	8.9e-10	IPR008979	Galactose-binding like
ZP_05415629.1	Bacteroides finegoldii DSM 17565	705	ProfileScan	PS50022	FA58C_3	562	665	0	IPR000421	Coagulation factor 5/8 type, C-terminal	Biological Process: cell adhesion (GO:0007155)
ZP_05415629.1	Bacteroides finegoldii DSM 17565	705	ProfileScan	PS51257	PROKAR_LIPOPROTEIN	1	29	0	NULL	NULL
ZP_05282640.1	Bacteroides fragilis 3_1_12	932	HMMPfam	PF00754	F5_F8_type_C	220	354	5.2e-15	IPR000421	Coagulation factor 5/8 type, C-terminal	Biological Process: cell adhesion (GO:0007155)
ZP_05282640.1	Bacteroides fragilis 3_1_12	932	superfamily	SSF49785	Galactose-binding domain-like	190	361	2.1e-24	IPR008979	Galactose-binding like
YP_212553.1	Bacteroides fragilis NCTC 9343	939	ProfileScan	PS51257	PROKAR_LIPOPROTEIN	1	21	6	NULL	NULL
YP_212553.1	Bacteroides fragilis NCTC 9343	939	superfamily	SSF49785	Galactose-binding domain-like	196	368	3e-24	IPR008979	Galactose-binding like
YP_212553.1	Bacteroides fragilis NCTC 9343	939	HMMPfam	PF00754	F5_F8_type_C	227	361	3.1e-15	IPR000421	Coagulation factor 5/8 type, C-terminal	Biological Process: cell adhesion (GO:0007155)
ZP_03207951.1	Bacteroides plebeius DSM 17135	856	superfamily	SSF49785	Gal_bind_like	112	272	1.7e-18	IPR008979	Galactose-binding like
ZP_03207951.1	Bacteroides plebeius DSM 17135	856	ProfileScan	PS51257	PROKAR_LIPOPROTEIN	1	23	0	NULL	NULL
ZP_03207951.1	Bacteroides plebeius DSM 17135	856	HMMPfam	PF00754	F5_F8_type_C	138	265	4.2e-08	IPR000421	Coagulation factor 5/8 type, C-terminal	Biological Process: cell adhesion (GO:0007155)
ZP_04846622.1	Bacteroides sp. 1_1_6	956	HMMPfam	PF00754	F5_F8_type_C	222	350	2.1e-27	IPR000421	Coagulation factor 5/8 type, C-terminal	Biological Process: cell adhesion (GO:0007155)
ZP_04846622.1	Bacteroides sp. 1_1_6	956	superfamily	SSF49785	Galactose-binding domain-like	196	357	2.1e-33	IPR008979	Galactose-binding like
ZP_04846622.1	Bacteroides sp. 1_1_6	956	ProfileScan	PS50022	FA58C_3	213	355	9.731	IPR000421	Coagulation factor 5/8 type, C-terminal	Biological Process: cell adhesion (GO:0007155)
ZP_04847358.1	Bacteroides sp. 1_1_6	996	HMMPfam	PF00754	F5_F8_type_C	236	363	1.1e-07	IPR000421	Coagulation factor 5/8 type, C-terminal	Biological Process: cell adhesion (GO:0007155)
ZP_04847358.1	Bacteroides sp. 1_1_6	996	superfamily	SSF49785	Galactose-binding domain-like	210	366	4.2e-17	IPR008979	Galactose-binding like
ZP_04847358.1	Bacteroides sp. 1_1_6	996	ProfileScan	PS51257	PROKAR_LIPOPROTEIN	1	26	6	NULL	NULL
ZP_04842342.1	Bacteroides sp. 3_2_5	939	HMMPfam	PF00754	F5_F8_type_C	227	361	3.1e-15	IPR000421	Coagulation factor 5/8 type, C-terminal	Biological Process: cell adhesion (GO:0007155)
ZP_04842342.1	Bacteroides sp. 3_2_5	939	superfamily	SSF49785	Galactose-binding domain-like	196	368	3e-24	IPR008979	Galactose-binding like
ZP_04842342.1	Bacteroides sp. 3_2_5	939	ProfileScan	PS51257	PROKAR_LIPOPROTEIN	1	21	6	NULL	NULL
ZP_05757374.1	Bacteroides sp. D2	814	ProfileScan	PS51257	PROKAR_LIPOPROTEIN	1	24	6	NULL	NULL
ZP_05757374.1	Bacteroides sp. D2	814	PatternScan	PS01159	WW_DOMAIN_1	262	286	NA	IPR001202	WW/Rsp5/WWP	Molecular Function: protein binding (GO:0005515)
NP_809190.1	Bacteroides thetaiotaomicron VPI-5482	705	superfamily	SSF49785	Gal_bind_like	499	680	1.6e-12	IPR008979	Galactose-binding like
NP_809190.1	Bacteroides thetaiotaomicron VPI-5482	705	ProfileScan	PS50022	FA58C_3	523	693	0	IPR000421	Coagulation factor 5/8 type, C-terminal	Biological Process: cell adhesion (GO:0007155)
NP_809190.1	Bacteroides thetaiotaomicron VPI-5482	705	ProfileScan	PS51257	PROKAR_LIPOPROTEIN	1	27	0	NULL	NULL
NP_809190.1	Bacteroides thetaiotaomicron VPI-5482	705	HMMPfam	PF00754	F5_F8_type_C	543	598	0.43	IPR000421	Coagulation factor 5/8 type, C-terminal	Biological Process: cell adhesion (GO:0007155)
NP_811927.1	Bacteroides thetaiotaomicron VPI-5482	968	superfamily	SSF49785	Gal_bind_like	208	369	3.4e-34	IPR008979	Galactose-binding like
NP_811927.1	Bacteroides thetaiotaomicron VPI-5482	968	ProfileScan	PS50022	FA58C_3	225	367	0	IPR000421	Coagulation factor 5/8 type, C-terminal	Biological Process: cell adhesion (GO:0007155)
NP_811927.1	Bacteroides thetaiotaomicron VPI-5482	968	ProfileScan	PS51257	PROKAR_LIPOPROTEIN	1	21	0	NULL	NULL
NP_811927.1	Bacteroides thetaiotaomicron VPI-5482	968	HMMPfam	PF00754	F5_F8_type_C	234	362	1.3e-26	IPR000421	Coagulation factor 5/8 type, C-terminal	Biological Process: cell adhesion (GO:0007155)
NP_813155.1	Bacteroides thetaiotaomicron VPI-5482	857	superfamily	SSF49785	Gal_bind_like	113	273	7.9e-21	IPR008979	Galactose-binding like
NP_813155.1	Bacteroides thetaiotaomicron VPI-5482	857	ProfileScan	PS51257	PROKAR_LIPOPROTEIN	1	23	0	NULL	NULL
NP_813155.1	Bacteroides thetaiotaomicron VPI-5482	857	HMMPfam	PF00754	F5_F8_type_C	139	266	5.9e-08	IPR000421	Coagulation factor 5/8 type, C-terminal	Biological Process: cell adhesion (GO:0007155)
NP_813183.1	Bacteroides thetaiotaomicron VPI-5482	996	superfamily	SSF49785	Gal_bind_like	210	366	2.5e-17	IPR008979	Galactose-binding like
NP_813183.1	Bacteroides thetaiotaomicron VPI-5482	996	ProfileScan	PS51257	PROKAR_LIPOPROTEIN	1	26	0	NULL	NULL
NP_813183.1	Bacteroides thetaiotaomicron VPI-5482	996	HMMPfam	PF00754	F5_F8_type_C	236	363	6.1e-05	IPR000421	Coagulation factor 5/8 type, C-terminal	Biological Process: cell adhesion (GO:0007155)
YP_001298266.1	Bacteroides vulgatus ATCC 8482	969	superfamily	SSF49785	Gal_bind_like	211	368	8.9e-16	IPR008979	Galactose-binding like
YP_001298266.1	Bacteroides vulgatus ATCC 8482	969	ProfileScan	PS51257	PROKAR_LIPOPROTEIN	1	22	0	NULL	NULL
YP_003154412.1	Brachybacterium faecium DSM 4810	464	ProfileScan	PS51318	TAT	1	33	8.839	IPR017909	Twin arginine translocation signal, Tat
XP_002613810.1	Branchiostoma floridae	676	PatternScan	PS00142	ZINC_PROTEASE	536	545	0	NULL	NULL
XP_002613810.1	Branchiostoma floridae	676	HMMPfam	PF03989	DNA_gyraseA_C	58	108	0.025	IPR006691	DNA gyrase/topoisomerase IV, subunit A, C-terminal beta-pinwheel	Molecular Function: DNA binding (GO:0003677), Molecular Function: DNA topoisomerase activity (GO:0003916), Molecular Function: ATP binding (GO:0005524), Cellular Component: chromosome (GO:0005694), Biological Process: DNA topological change (GO:0006265)
ZP_02211508.1	Clostridium bartlettii DSM 16795	1263	HMMPfam	PF08305	NPCBM	646	789	2.1e-31	IPR013222	Glycosyl hydrolase family 98, putative carbohydrate-binding module
ZP_02211508.1	Clostridium bartlettii DSM 16795	1263	HMMPfam	PF08305	NPCBM	865	1012	6e-60	IPR013222	Glycosyl hydrolase family 98, putative carbohydrate-binding module
ZP_02211508.1	Clostridium bartlettii DSM 16795	1263	PatternScan	PS00018	EF_HAND_1	216	228	0	IPR018247	EF-HAND 1
ZP_02211508.1	Clostridium bartlettii DSM 16795	1263	PatternScan	PS00142	ZINC_PROTEASE	331	340	0	NULL	NULL
ZP_02211508.1	Clostridium bartlettii DSM 16795	1263	superfamily	SSF52058	SSF52058	1074	1169	5.5e-10	NULL	NULL
ZP_02211508.1	Clostridium bartlettii DSM 16795	1263	HMMSmart	SM00776	NPCBM	867	1012	1.3e-58	IPR013222	Glycosyl hydrolase family 98, putative carbohydrate-binding module
ZP_02211508.1	Clostridium bartlettii DSM 16795	1263	HMMSmart	SM00776	NPCBM	648	789	1.3e-34	IPR013222	Glycosyl hydrolase family 98, putative carbohydrate-binding module
ZP_02211509.1	Clostridium bartlettii DSM 16795	2011	HMMPfam	PF08305	NPCBM	876	1020	5.3e-32	IPR013222	Glycosyl hydrolase family 98, putative carbohydrate-binding module
ZP_02211509.1	Clostridium bartlettii DSM 16795	2011	HMMPfam	PF08305	NPCBM	1392	1539	7.2e-36	IPR013222	Glycosyl hydrolase family 98, putative carbohydrate-binding module
ZP_02211509.1	Clostridium bartlettii DSM 16795	2011	HMMPfam	PF08305	NPCBM	1615	1762	4.9e-55	IPR013222	Glycosyl hydrolase family 98, putative carbohydrate-binding module
ZP_02211509.1	Clostridium bartlettii DSM 16795	2011	superfamily	SSF49785	Gal_bind_like	93	231	4.9e-15	IPR008979	Galactose-binding like
ZP_02211509.1	Clostridium bartlettii DSM 16795	2011	superfamily	SSF49785	Gal_bind_like	1107	1261	2.8e-24	IPR008979	Galactose-binding like
ZP_02211509.1	Clostridium bartlettii DSM 16795	2011	ProfileScan	PS50022	FA58C_3	1106	1259	0	IPR000421	Coagulation factor 5/8 type, C-terminal	Biological Process: cell adhesion (GO:0007155)
ZP_02211509.1	Clostridium bartlettii DSM 16795	2011	PatternScan	PS00142	ZINC_PROTEASE	559	568	0	NULL	NULL
ZP_02211509.1	Clostridium bartlettii DSM 16795	2011	superfamily	SSF52058	SSF52058	1824	1910	5.1e-07	NULL	NULL
ZP_02211509.1	Clostridium bartlettii DSM 16795	2011	HMMSmart	SM00776	NPCBM	878	1020	2e-37	IPR013222	Glycosyl hydrolase family 98, putative carbohydrate-binding module
ZP_02211509.1	Clostridium bartlettii DSM 16795	2011	HMMSmart	SM00776	NPCBM	1394	1539	3.8e-36	IPR013222	Glycosyl hydrolase family 98, putative carbohydrate-binding module
ZP_02211509.1	Clostridium bartlettii DSM 16795	2011	HMMSmart	SM00776	NPCBM	1617	1762	5.3e-56	IPR013222	Glycosyl hydrolase family 98, putative carbohydrate-binding module
ZP_02211509.1	Clostridium bartlettii DSM 16795	2011	HMMPfam	PF00754	F5_F8_type_C	98	227	2.2e-05	IPR000421	Coagulation factor 5/8 type, C-terminal	Biological Process: cell adhesion (GO:0007155)
ZP_02211509.1	Clostridium bartlettii DSM 16795	2011	HMMPfam	PF00754	F5_F8_type_C	1124	1254	9.4e-17	IPR000421	Coagulation factor 5/8 type, C-terminal	Biological Process: cell adhesion (GO:0007155)
ZP_04823618.1	Clostridium botulinum E1 str. 'BoNT E Beluga'	1872	HMMPfam	PF00754	F5_F8_type_C	1573	1707	2e-09	IPR000421	Coagulation factor 5/8 type, C-terminal	Biological Process: cell adhesion (GO:0007155)
ZP_04823618.1	Clostridium botulinum E1 str. 'BoNT E Beluga'	1872	ProfileScan	PS50022	FA58C_3	1553	1712	15.001	IPR000421	Coagulation factor 5/8 type, C-terminal	Biological Process: cell adhesion (GO:0007155)
ZP_04823618.1	Clostridium botulinum E1 str. 'BoNT E Beluga'	1872	ProfileScan	PS50853	FN3	544	637	13.165	IPR003961	Fibronectin, type III
ZP_04823618.1	Clostridium botulinum E1 str. 'BoNT E Beluga'	1872	ProfileScan	PS50853	FN3	639	728	13.579	IPR003961	Fibronectin, type III
ZP_04823618.1	Clostridium botulinum E1 str. 'BoNT E Beluga'	1872	HMMSmart	SM00060	no description	548	627	0.35	IPR003961	Fibronectin, type III
ZP_04823618.1	Clostridium botulinum E1 str. 'BoNT E Beluga'	1872	HMMSmart	SM00060	no description	643	718	0.00013	IPR003961	Fibronectin, type III
ZP_04823618.1	Clostridium botulinum E1 str. 'BoNT E Beluga'	1872	PatternScan	PS00018	EF_HAND_1	372	384	NA	IPR018247	EF-HAND 1
ZP_04823618.1	Clostridium botulinum E1 str. 'BoNT E Beluga'	1872	PatternScan	PS00018	EF_HAND_1	1209	1221	NA	IPR018247	EF-HAND 1
ZP_04823618.1	Clostridium botulinum E1 str. 'BoNT E Beluga'	1872	PatternScan	PS00142	ZINC_PROTEASE	1283	1292	NA	NULL	NULL
ZP_04823618.1	Clostridium botulinum E1 str. 'BoNT E Beluga'	1872	superfamily	SSF49785	Galactose-binding domain-like	1543	1717	2.3e-13	IPR008979	Galactose-binding like
ZP_04823618.1	Clostridium botulinum E1 str. 'BoNT E Beluga'	1872	superfamily	SSF49265	Fibronectin type III	629	737	9.9e-12	IPR008957	Fibronectin, type III-like fold
ZP_04823618.1	Clostridium botulinum E1 str. 'BoNT E Beluga'	1872	superfamily	SSF49265	Fibronectin type III	543	639	4.6e-10	IPR008957	Fibronectin, type III-like fold
ZP_04823618.1	Clostridium botulinum E1 str. 'BoNT E Beluga'	1872	superfamily	SSF49785	Galactose-binding domain-like	754	897	3.8e-07	IPR008979	Galactose-binding like
ZP_04823618.1	Clostridium botulinum E1 str. 'BoNT E Beluga'	1872	HMMPfam	PF00041	fn3	548	630	3.3e-08	IPR003961	Fibronectin, type III
ZP_04823618.1	Clostridium botulinum E1 str. 'BoNT E Beluga'	1872	HMMPfam	PF00041	fn3	643	721	1.9e-06	IPR003961	Fibronectin, type III
YP_001920091.1	Clostridium botulinum E3 str. Alaska E43	1886	HMMPfam	PF00041	fn3	657	735	0.0041	IPR003961	Fibronectin, type III
YP_001920091.1	Clostridium botulinum E3 str. Alaska E43	1886	HMMPfam	PF00041	fn3	562	644	0.0001	IPR003961	Fibronectin, type III
YP_001920091.1	Clostridium botulinum E3 str. Alaska E43	1886	superfamily	SSF49785	Gal_bind_like	1599	1728	6.1e-13	IPR008979	Galactose-binding like
YP_001920091.1	Clostridium botulinum E3 str. Alaska E43	1886	superfamily	SSF49785	Gal_bind_like	768	911	1.1e-07	IPR008979	Galactose-binding like
YP_001920091.1	Clostridium botulinum E3 str. Alaska E43	1886	PatternScan	PS00018	EF_HAND_1	1223	1235	0	IPR018247	EF-HAND 1
YP_001920091.1	Clostridium botulinum E3 str. Alaska E43	1886	PatternScan	PS00018	EF_HAND_1	386	398	0	IPR018247	EF-HAND 1
YP_001920091.1	Clostridium botulinum E3 str. Alaska E43	1886	HMMSmart	SM00060	FN3	562	641	0.001	IPR003961	Fibronectin, type III
YP_001920091.1	Clostridium botulinum E3 str. Alaska E43	1886	HMMSmart	SM00060	FN3	657	732	2.7e-07	IPR003961	Fibronectin, type III
YP_001920091.1	Clostridium botulinum E3 str. Alaska E43	1886	ProfileScan	PS50022	FA58C_3	1567	1726	0	IPR000421	Coagulation factor 5/8 type, C-terminal	Biological Process: cell adhesion (GO:0007155)
YP_001920091.1	Clostridium botulinum E3 str. Alaska E43	1886	PatternScan	PS00142	ZINC_PROTEASE	1297	1306	0	NULL	NULL
YP_001920091.1	Clostridium botulinum E3 str. Alaska E43	1886	superfamily	SSF49265	FN_III-like	643	751	5.1e-12	IPR008957	Fibronectin, type III-like fold
YP_001920091.1	Clostridium botulinum E3 str. Alaska E43	1886	superfamily	SSF49265	FN_III-like	557	653	6.5e-10	IPR008957	Fibronectin, type III-like fold
YP_001920091.1	Clostridium botulinum E3 str. Alaska E43	1886	ProfileScan	PS50853	FN3	653	742	0	IPR003961	Fibronectin, type III
YP_001920091.1	Clostridium botulinum E3 str. Alaska E43	1886	ProfileScan	PS50853	FN3	558	651	0	IPR003961	Fibronectin, type III
YP_001920091.1	Clostridium botulinum E3 str. Alaska E43	1886	HMMPfam	PF00754	F5_F8_type_C	1587	1721	3.5e-06	IPR000421	Coagulation factor 5/8 type, C-terminal	Biological Process: cell adhesion (GO:0007155)
ZP_01802287.1	Clostridium difficile QCD-32g58	834	PatternScan	PS00018	EF_HAND_1	64	76	NA	IPR018247	EF-HAND 1
ZP_01802287.1	Clostridium difficile QCD-32g58	834	ProfileScan	PS50022	FA58C_3	447	640	11.697	IPR000421	Coagulation factor 5/8 type, C-terminal	Biological Process: cell adhesion (GO:0007155)
ZP_01802287.1	Clostridium difficile QCD-32g58	834	superfamily	SSF49785	Galactose-binding domain-like	469	645	2e-06	IPR008979	Galactose-binding like
ZP_06117837.1	Clostridium hathewayi DSM 13479	1749	HMMPfam	PF00754	F5_F8_type_C	1459	1591	1.1e-05	IPR000421	Coagulation factor 5/8 type, C-terminal	Biological Process: cell adhesion (GO:0007155)
ZP_06117837.1	Clostridium hathewayi DSM 13479	1749	PatternScan	PS00018	EF_HAND_1	171	183	NA	IPR018247	EF-HAND 1
ZP_06117837.1	Clostridium hathewayi DSM 13479	1749	PatternScan	PS00018	EF_HAND_1	203	215	NA	IPR018247	EF-HAND 1
ZP_06117837.1	Clostridium hathewayi DSM 13479	1749	PatternScan	PS00591	GLYCOSYL_HYDROL_F10	1583	1593	NA	IPR001000	Glycoside hydrolase, family 10	Molecular Function: hydrolase activity, hydrolyzing O-glycosyl compounds (GO:0004553), Biological Process: carbohydrate metabolic process (GO:0005975)
ZP_06117837.1	Clostridium hathewayi DSM 13479	1749	superfamily	SSF49265	Fibronectin type III	497	608	2.7e-12	IPR008957	Fibronectin, type III-like fold
ZP_06117837.1	Clostridium hathewayi DSM 13479	1749	superfamily	SSF49785	Galactose-binding domain-like	1429	1598	7e-11	IPR008979	Galactose-binding like
ZP_06117837.1	Clostridium hathewayi DSM 13479	1749	superfamily	SSF63446	Type I dockerin domain	164	225	2.7e-08	IPR016134	Cellulosome enzyme, dockerin type I	Biological Process: polysaccharide catabolic process (GO:0000272)
ZP_06117837.1	Clostridium hathewayi DSM 13479	1749	superfamily	SSF49265	Fibronectin type III	414	505	9.2e-08	IPR008957	Fibronectin, type III-like fold
ZP_06117837.1	Clostridium hathewayi DSM 13479	1749	superfamily	SSF49785	Galactose-binding domain-like	606	766	3.2e-07	IPR008979	Galactose-binding like
ZP_06117837.1	Clostridium hathewayi DSM 13479	1749	HMMSmart	SM00060	no description	415	496	0.00037	IPR003961	Fibronectin, type III
ZP_06117837.1	Clostridium hathewayi DSM 13479	1749	HMMSmart	SM00060	no description	512	589	0.00042	IPR003961	Fibronectin, type III
ZP_06117837.1	Clostridium hathewayi DSM 13479	1749	ProfileScan	PS50022	FA58C_3	1429	1596	12.025	IPR000421	Coagulation factor 5/8 type, C-terminal	Biological Process: cell adhesion (GO:0007155)
ZP_06117837.1	Clostridium hathewayi DSM 13479	1749	ProfileScan	PS50853	FN3	414	506	13.571	IPR003961	Fibronectin, type III
ZP_06117837.1	Clostridium hathewayi DSM 13479	1749	ProfileScan	PS50853	FN3	512	598	14.448	IPR003961	Fibronectin, type III
ZP_06117837.1	Clostridium hathewayi DSM 13479	1749	HMMPfam	PF00041	fn3	418	499	8.8e-06	IPR003961	Fibronectin, type III
ZP_06117837.1	Clostridium hathewayi DSM 13479	1749	HMMPfam	PF00041	fn3	512	592	6.2e-08	IPR003961	Fibronectin, type III
ZP_03292590.1	Clostridium hiranonis DSM 13275	1937	HMMPfam	PF00041	fn3	421	502	0.0074	IPR003961	Fibronectin, type III
ZP_03292590.1	Clostridium hiranonis DSM 13275	1937	HMMPfam	PF00041	fn3	555	650	2e-07	IPR003961	Fibronectin, type III
ZP_03292590.1	Clostridium hiranonis DSM 13275	1937	superfamily	SSF49785	Gal_bind_like	708	830	5.9e-10	IPR008979	Galactose-binding like
ZP_03292590.1	Clostridium hiranonis DSM 13275	1937	superfamily	SSF49785	Gal_bind_like	1566	1765	3.4e-07	IPR008979	Galactose-binding like
ZP_03292590.1	Clostridium hiranonis DSM 13275	1937	superfamily	SSF63446	Cellulos_enz_dockerin_1	170	235	3.3e-09	IPR016134	Cellulosome enzyme, dockerin type I	Biological Process: polysaccharide catabolic process (GO:0000272)
ZP_03292590.1	Clostridium hiranonis DSM 13275	1937	PatternScan	PS00018	EF_HAND_1	204	216	0	IPR018247	EF-HAND 1
ZP_03292590.1	Clostridium hiranonis DSM 13275	1937	HMMSmart	SM00060	FN3	422	502	0.0056	IPR003961	Fibronectin, type III
ZP_03292590.1	Clostridium hiranonis DSM 13275	1937	HMMSmart	SM00060	FN3	555	647	1.6e-08	IPR003961	Fibronectin, type III
ZP_03292590.1	Clostridium hiranonis DSM 13275	1937	ProfileScan	PS50022	FA58C_3	1580	1760	0	IPR000421	Coagulation factor 5/8 type, C-terminal	Biological Process: cell adhesion (GO:0007155)
ZP_03292590.1	Clostridium hiranonis DSM 13275	1937	superfamily	SSF49265	FN_III-like	552	658	5.6e-09	IPR008957	Fibronectin, type III-like fold
ZP_03292590.1	Clostridium hiranonis DSM 13275	1937	ProfileScan	PS50853	FN3	422	513	0	IPR003961	Fibronectin, type III
ZP_03292590.1	Clostridium hiranonis DSM 13275	1937	ProfileScan	PS50853	FN3	551	657	0	IPR003961	Fibronectin, type III
ZP_03292590.1	Clostridium hiranonis DSM 13275	1937	HMMPfam	PF00754	F5_F8_type_C	1581	1758	0.00032	IPR000421	Coagulation factor 5/8 type, C-terminal	Biological Process: cell adhesion (GO:0007155)
ZP_03292590.1	Clostridium hiranonis DSM 13275	1937	HMMPfam	PF00404	Dockerin_1	204	224	2.8e-06	IPR018242	Dockerin type 1
YP_695519.1	Clostridium perfringens ATCC 13124	2142	HMMPfam	PF08305	NPCBM	1296	1438	3.7e-36	IPR013222	Glycosyl hydrolase family 98, putative carbohydrate-binding module
YP_695519.1	Clostridium perfringens ATCC 13124	2142	HMMPfam	PF08305	NPCBM	1515	1663	8.2e-53	IPR013222	Glycosyl hydrolase family 98, putative carbohydrate-binding module
YP_695519.1	Clostridium perfringens ATCC 13124	2142	HMMPfam	PF08305	NPCBM	1739	1888	1.2e-55	IPR013222	Glycosyl hydrolase family 98, putative carbohydrate-binding module
YP_695519.1	Clostridium perfringens ATCC 13124	2142	HMMPfam	PF07554	FIVAR	1893	1944	0.00068	IPR011490	Uncharacterised sugar-binding
YP_695519.1	Clostridium perfringens ATCC 13124	2142	superfamily	SSF49785	Gal_bind_like	48	208	6.2e-20	IPR008979	Galactose-binding like
YP_695519.1	Clostridium perfringens ATCC 13124	2142	superfamily	SSF49785	Gal_bind_like	272	428	1.7e-20	IPR008979	Galactose-binding like
YP_695519.1	Clostridium perfringens ATCC 13124	2142	superfamily	SSF49785	Gal_bind_like	513	652	2.2e-20	IPR008979	Galactose-binding like
YP_695519.1	Clostridium perfringens ATCC 13124	2142	superfamily	SSF52058	SSF52058	1953	2049	1.3e-07	NULL	NULL
YP_695519.1	Clostridium perfringens ATCC 13124	2142	HMMSmart	SM00776	NPCBM	1297	1438	2.2e-41	IPR013222	Glycosyl hydrolase family 98, putative carbohydrate-binding module
YP_695519.1	Clostridium perfringens ATCC 13124	2142	HMMSmart	SM00776	NPCBM	1516	1663	6e-59	IPR013222	Glycosyl hydrolase family 98, putative carbohydrate-binding module
YP_695519.1	Clostridium perfringens ATCC 13124	2142	HMMSmart	SM00776	NPCBM	1741	1888	9.3e-60	IPR013222	Glycosyl hydrolase family 98, putative carbohydrate-binding module
YP_695519.1	Clostridium perfringens ATCC 13124	2142	ProfileScan	PS50022	FA58C_3	60	206	0	IPR000421	Coagulation factor 5/8 type, C-terminal	Biological Process: cell adhesion (GO:0007155)
YP_695519.1	Clostridium perfringens ATCC 13124	2142	ProfileScan	PS50022	FA58C_3	280	426	0	IPR000421	Coagulation factor 5/8 type, C-terminal	Biological Process: cell adhesion (GO:0007155)
YP_695519.1	Clostridium perfringens ATCC 13124	2142	PatternScan	PS00142	ZINC_PROTEASE	969	978	0	NULL	NULL
YP_695519.1	Clostridium perfringens ATCC 13124	2142	HMMPfam	PF00754	F5_F8_type_C	71	201	1.8e-17	IPR000421	Coagulation factor 5/8 type, C-terminal	Biological Process: cell adhesion (GO:0007155)
YP_695519.1	Clostridium perfringens ATCC 13124	2142	HMMPfam	PF00754	F5_F8_type_C	295	421	3.9e-17	IPR000421	Coagulation factor 5/8 type, C-terminal	Biological Process: cell adhesion (GO:0007155)
YP_695519.1	Clostridium perfringens ATCC 13124	2142	HMMPfam	PF00754	F5_F8_type_C	518	646	3.2e-18	IPR000421	Coagulation factor 5/8 type, C-terminal	Biological Process: cell adhesion (GO:0007155)
YP_695932.1	Clostridium perfringens ATCC 13124	1687	HMMPfam	PF08305	NPCBM	1080	1227	7.1e-78	IPR013222	Glycosyl hydrolase family 98, putative carbohydrate-binding module
YP_695932.1	Clostridium perfringens ATCC 13124	1687	HMMPfam	PF08305	NPCBM	1303	1450	1.5e-75	IPR013222	Glycosyl hydrolase family 98, putative carbohydrate-binding module
YP_695932.1	Clostridium perfringens ATCC 13124	1687	HMMPfam	PF07554	FIVAR	226	282	0.00018	IPR011490	Uncharacterised sugar-binding
YP_695932.1	Clostridium perfringens ATCC 13124	1687	HMMPfam	PF07554	FIVAR	1455	1504	0.05	IPR011490	Uncharacterised sugar-binding
YP_695932.1	Clostridium perfringens ATCC 13124	1687	superfamily	SSF49785	Gal_bind_like	70	212	5.3e-21	IPR008979	Galactose-binding like
YP_695932.1	Clostridium perfringens ATCC 13124	1687	superfamily	SSF49785	Gal_bind_like	295	434	2.1e-19	IPR008979	Galactose-binding like
YP_695932.1	Clostridium perfringens ATCC 13124	1687	superfamily	SSF52058	SSF52058	1536	1603	4.6e-08	NULL	NULL
YP_695932.1	Clostridium perfringens ATCC 13124	1687	PatternScan	PS00599	AA_TRANSFER_CLASS_2	1348	1357	0	IPR001917	Aminotransferase, class-II, pyridoxal-phosphate binding site	Biological Process: metabolic process (GO:0008152), Molecular Function: transferase activity (GO:0016740)
YP_695932.1	Clostridium perfringens ATCC 13124	1687	HMMSmart	SM00776	NPCBM	1081	1227	1.9e-76	IPR013222	Glycosyl hydrolase family 98, putative carbohydrate-binding module
YP_695932.1	Clostridium perfringens ATCC 13124	1687	HMMSmart	SM00776	NPCBM	1305	1450	1.7e-75	IPR013222	Glycosyl hydrolase family 98, putative carbohydrate-binding module
YP_695932.1	Clostridium perfringens ATCC 13124	1687	PatternScan	PS00142	ZINC_PROTEASE	753	762	0	NULL	NULL
YP_695932.1	Clostridium perfringens ATCC 13124	1687	HMMPfam	PF00754	F5_F8_type_C	75	206	6.1e-17	IPR000421	Coagulation factor 5/8 type, C-terminal	Biological Process: cell adhesion (GO:0007155)
YP_695932.1	Clostridium perfringens ATCC 13124	1687	HMMPfam	PF00754	F5_F8_type_C	300	428	5.9e-15	IPR000421	Coagulation factor 5/8 type, C-terminal	Biological Process: cell adhesion (GO:0007155)
ZP_02635227.1	Clostridium perfringens B str. ATCC 3626	1688	HMMPfam	PF08305	NPCBM	1303	1450	1.5e-74	IPR013222	Glycosyl hydrolase family 98, putative carbohydrate-binding module
ZP_02635227.1	Clostridium perfringens B str. ATCC 3626	1688	HMMPfam	PF08305	NPCBM	1080	1227	7.1e-78	IPR013222	Glycosyl hydrolase family 98, putative carbohydrate-binding module
ZP_02635227.1	Clostridium perfringens B str. ATCC 3626	1688	HMMPfam	PF07554	FIVAR	1455	1504	0.05	IPR011490	Uncharacterised sugar-binding
ZP_02635227.1	Clostridium perfringens B str. ATCC 3626	1688	HMMPfam	PF07554	FIVAR	226	282	0.00024	IPR011490	Uncharacterised sugar-binding
ZP_02635227.1	Clostridium perfringens B str. ATCC 3626	1688	superfamily	SSF49785	Gal_bind_like	295	434	8.5e-20	IPR008979	Galactose-binding like
ZP_02635227.1	Clostridium perfringens B str. ATCC 3626	1688	superfamily	SSF49785	Gal_bind_like	70	212	5.1e-22	IPR008979	Galactose-binding like
ZP_02635227.1	Clostridium perfringens B str. ATCC 3626	1688	PatternScan	PS00142	ZINC_PROTEASE	753	762	0	NULL	NULL
ZP_02635227.1	Clostridium perfringens B str. ATCC 3626	1688	superfamily	SSF52058	SSF52058	1536	1603	4.6e-08	NULL	NULL
ZP_02635227.1	Clostridium perfringens B str. ATCC 3626	1688	PatternScan	PS00599	AA_TRANSFER_CLASS_2	1348	1357	0	IPR001917	Aminotransferase, class-II, pyridoxal-phosphate binding site	Biological Process: metabolic process (GO:0008152), Molecular Function: transferase activity (GO:0016740)
ZP_02635227.1	Clostridium perfringens B str. ATCC 3626	1688	HMMSmart	SM00776	NPCBM	1305	1450	8.5e-75	IPR013222	Glycosyl hydrolase family 98, putative carbohydrate-binding module
ZP_02635227.1	Clostridium perfringens B str. ATCC 3626	1688	HMMSmart	SM00776	NPCBM	1081	1227	1.9e-76	IPR013222	Glycosyl hydrolase family 98, putative carbohydrate-binding module
ZP_02635227.1	Clostridium perfringens B str. ATCC 3626	1688	HMMPfam	PF00754	F5_F8_type_C	300	428	3.8e-14	IPR000421	Coagulation factor 5/8 type, C-terminal	Biological Process: cell adhesion (GO:0007155)
ZP_02635227.1	Clostridium perfringens B str. ATCC 3626	1688	HMMPfam	PF00754	F5_F8_type_C	75	206	2e-17	IPR000421	Coagulation factor 5/8 type, C-terminal	Biological Process: cell adhesion (GO:0007155)
ZP_02637411.1	Clostridium perfringens B str. ATCC 3626	2156	HMMPfam	PF08305	NPCBM	1529	1677	1.1e-52	IPR013222	Glycosyl hydrolase family 98, putative carbohydrate-binding module
ZP_02637411.1	Clostridium perfringens B str. ATCC 3626	2156	HMMPfam	PF08305	NPCBM	1753	1902	1.8e-54	IPR013222	Glycosyl hydrolase family 98, putative carbohydrate-binding module
ZP_02637411.1	Clostridium perfringens B str. ATCC 3626	2156	HMMPfam	PF08305	NPCBM	1309	1452	4e-37	IPR013222	Glycosyl hydrolase family 98, putative carbohydrate-binding module
ZP_02637411.1	Clostridium perfringens B str. ATCC 3626	2156	HMMPfam	PF07554	FIVAR	1907	1958	7.1e-05	IPR011490	Uncharacterised sugar-binding
ZP_02637411.1	Clostridium perfringens B str. ATCC 3626	2156	superfamily	SSF49785	Gal_bind_like	513	652	2.2e-20	IPR008979	Galactose-binding like
ZP_02637411.1	Clostridium perfringens B str. ATCC 3626	2156	superfamily	SSF49785	Gal_bind_like	291	427	3.7e-20	IPR008979	Galactose-binding like
ZP_02637411.1	Clostridium perfringens B str. ATCC 3626	2156	superfamily	SSF49785	Gal_bind_like	66	207	1.3e-19	IPR008979	Galactose-binding like
ZP_02637411.1	Clostridium perfringens B str. ATCC 3626	2156	ProfileScan	PS50022	FA58C_3	280	426	0	IPR000421	Coagulation factor 5/8 type, C-terminal	Biological Process: cell adhesion (GO:0007155)
ZP_02637411.1	Clostridium perfringens B str. ATCC 3626	2156	ProfileScan	PS50022	FA58C_3	54	206	0	IPR000421	Coagulation factor 5/8 type, C-terminal	Biological Process: cell adhesion (GO:0007155)
ZP_02637411.1	Clostridium perfringens B str. ATCC 3626	2156	superfamily	SSF52058	SSF52058	1967	2063	2.1e-08	NULL	NULL
ZP_02637411.1	Clostridium perfringens B str. ATCC 3626	2156	HMMSmart	SM00776	NPCBM	1755	1902	3.3e-59	IPR013222	Glycosyl hydrolase family 98, putative carbohydrate-binding module
ZP_02637411.1	Clostridium perfringens B str. ATCC 3626	2156	HMMSmart	SM00776	NPCBM	1530	1677	5.3e-59	IPR013222	Glycosyl hydrolase family 98, putative carbohydrate-binding module
ZP_02637411.1	Clostridium perfringens B str. ATCC 3626	2156	HMMSmart	SM00776	NPCBM	1311	1452	6.2e-42	IPR013222	Glycosyl hydrolase family 98, putative carbohydrate-binding module
ZP_02637411.1	Clostridium perfringens B str. ATCC 3626	2156	HMMPfam	PF00754	F5_F8_type_C	293	421	5.1e-16	IPR000421	Coagulation factor 5/8 type, C-terminal	Biological Process: cell adhesion (GO:0007155)
ZP_02637411.1	Clostridium perfringens B str. ATCC 3626	2156	HMMPfam	PF00754	F5_F8_type_C	518	646	3.2e-18	IPR000421	Coagulation factor 5/8 type, C-terminal	Biological Process: cell adhesion (GO:0007155)
ZP_02637411.1	Clostridium perfringens B str. ATCC 3626	2156	HMMPfam	PF00754	F5_F8_type_C	71	201	1.9e-17	IPR000421	Coagulation factor 5/8 type, C-terminal	Biological Process: cell adhesion (GO:0007155)
ZP_02865871.1	Clostridium perfringens C str. JGS1495	2156	HMMPfam	PF08305	NPCBM	1529	1677	1.1e-52	IPR013222	Glycosyl hydrolase family 98, putative carbohydrate-binding module
ZP_02865871.1	Clostridium perfringens C str. JGS1495	2156	HMMPfam	PF08305	NPCBM	1753	1902	3.7e-53	IPR013222	Glycosyl hydrolase family 98, putative carbohydrate-binding module
ZP_02865871.1	Clostridium perfringens C str. JGS1495	2156	HMMPfam	PF08305	NPCBM	1309	1452	2.3e-35	IPR013222	Glycosyl hydrolase family 98, putative carbohydrate-binding module
ZP_02865871.1	Clostridium perfringens C str. JGS1495	2156	HMMPfam	PF07554	FIVAR	1907	1958	0.0021	IPR011490	Uncharacterised sugar-binding
ZP_02865871.1	Clostridium perfringens C str. JGS1495	2156	superfamily	SSF49785	Gal_bind_like	513	652	2.2e-20	IPR008979	Galactose-binding like
ZP_02865871.1	Clostridium perfringens C str. JGS1495	2156	superfamily	SSF49785	Gal_bind_like	291	427	6.6e-20	IPR008979	Galactose-binding like
ZP_02865871.1	Clostridium perfringens C str. JGS1495	2156	superfamily	SSF49785	Gal_bind_like	54	208	6.4e-20	IPR008979	Galactose-binding like
ZP_02865871.1	Clostridium perfringens C str. JGS1495	2156	ProfileScan	PS50022	FA58C_3	280	426	0	IPR000421	Coagulation factor 5/8 type, C-terminal	Biological Process: cell adhesion (GO:0007155)
ZP_02865871.1	Clostridium perfringens C str. JGS1495	2156	ProfileScan	PS50022	FA58C_3	60	206	0	IPR000421	Coagulation factor 5/8 type, C-terminal	Biological Process: cell adhesion (GO:0007155)
ZP_02865871.1	Clostridium perfringens C str. JGS1495	2156	superfamily	SSF52058	SSF52058	1967	2063	1.5e-07	NULL	NULL
ZP_02865871.1	Clostridium perfringens C str. JGS1495	2156	HMMSmart	SM00776	NPCBM	1755	1902	7.2e-58	IPR013222	Glycosyl hydrolase family 98, putative carbohydrate-binding module
ZP_02865871.1	Clostridium perfringens C str. JGS1495	2156	HMMSmart	SM00776	NPCBM	1530	1677	1.1e-58	IPR013222	Glycosyl hydrolase family 98, putative carbohydrate-binding module
ZP_02865871.1	Clostridium perfringens C str. JGS1495	2156	HMMSmart	SM00776	NPCBM	1311	1452	3.2e-40	IPR013222	Glycosyl hydrolase family 98, putative carbohydrate-binding module
ZP_02865871.1	Clostridium perfringens C str. JGS1495	2156	HMMPfam	PF00754	F5_F8_type_C	518	646	3.2e-18	IPR000421	Coagulation factor 5/8 type, C-terminal	Biological Process: cell adhesion (GO:0007155)
ZP_02865871.1	Clostridium perfringens C str. JGS1495	2156	HMMPfam	PF00754	F5_F8_type_C	293	421	9.7e-16	IPR000421	Coagulation factor 5/8 type, C-terminal	Biological Process: cell adhesion (GO:0007155)
ZP_02865871.1	Clostridium perfringens C str. JGS1495	2156	HMMPfam	PF00754	F5_F8_type_C	71	201	1.8e-17	IPR000421	Coagulation factor 5/8 type, C-terminal	Biological Process: cell adhesion (GO:0007155)
ZP_02637953.1	Clostridium perfringens CPE str. F4969	2156	HMMPfam	PF08305	NPCBM	1309	1452	7.4e-37	IPR013222	Glycosyl hydrolase family 98, putative carbohydrate-binding module
ZP_02637953.1	Clostridium perfringens CPE str. F4969	2156	HMMPfam	PF08305	NPCBM	1753	1902	5.6e-55	IPR013222	Glycosyl hydrolase family 98, putative carbohydrate-binding module
ZP_02637953.1	Clostridium perfringens CPE str. F4969	2156	HMMPfam	PF08305	NPCBM	1529	1677	1.9e-51	IPR013222	Glycosyl hydrolase family 98, putative carbohydrate-binding module
ZP_02637953.1	Clostridium perfringens CPE str. F4969	2156	HMMPfam	PF07554	FIVAR	1907	1958	0.00045	IPR011490	Uncharacterised sugar-binding
ZP_02637953.1	Clostridium perfringens CPE str. F4969	2156	superfamily	SSF49785	Gal_bind_like	513	652	3.9e-20	IPR008979	Galactose-binding like
ZP_02637953.1	Clostridium perfringens CPE str. F4969	2156	superfamily	SSF49785	Gal_bind_like	291	427	3.7e-20	IPR008979	Galactose-binding like
ZP_02637953.1	Clostridium perfringens CPE str. F4969	2156	superfamily	SSF49785	Gal_bind_like	66	207	1.3e-19	IPR008979	Galactose-binding like
ZP_02637953.1	Clostridium perfringens CPE str. F4969	2156	ProfileScan	PS50022	FA58C_3	280	426	0	IPR000421	Coagulation factor 5/8 type, C-terminal	Biological Process: cell adhesion (GO:0007155)
ZP_02637953.1	Clostridium perfringens CPE str. F4969	2156	ProfileScan	PS50022	FA58C_3	54	206	0	IPR000421	Coagulation factor 5/8 type, C-terminal	Biological Process: cell adhesion (GO:0007155)
ZP_02637953.1	Clostridium perfringens CPE str. F4969	2156	superfamily	SSF52058	SSF52058	1967	2063	4.5e-08	NULL	NULL
ZP_02637953.1	Clostridium perfringens CPE str. F4969	2156	HMMSmart	SM00776	NPCBM	1755	1902	3.1e-59	IPR013222	Glycosyl hydrolase family 98, putative carbohydrate-binding module
ZP_02637953.1	Clostridium perfringens CPE str. F4969	2156	HMMSmart	SM00776	NPCBM	1530	1677	4.7e-58	IPR013222	Glycosyl hydrolase family 98, putative carbohydrate-binding module
ZP_02637953.1	Clostridium perfringens CPE str. F4969	2156	HMMSmart	SM00776	NPCBM	1311	1452	5.4e-42	IPR013222	Glycosyl hydrolase family 98, putative carbohydrate-binding module
ZP_02637953.1	Clostridium perfringens CPE str. F4969	2156	HMMPfam	PF00754	F5_F8_type_C	518	646	2.4e-17	IPR000421	Coagulation factor 5/8 type, C-terminal	Biological Process: cell adhesion (GO:0007155)
ZP_02637953.1	Clostridium perfringens CPE str. F4969	2156	HMMPfam	PF00754	F5_F8_type_C	293	421	5.1e-16	IPR000421	Coagulation factor 5/8 type, C-terminal	Biological Process: cell adhesion (GO:0007155)
ZP_02637953.1	Clostridium perfringens CPE str. F4969	2156	HMMPfam	PF00754	F5_F8_type_C	71	201	1.9e-17	IPR000421	Coagulation factor 5/8 type, C-terminal	Biological Process: cell adhesion (GO:0007155)
ZP_02638647.1	Clostridium perfringens CPE str. F4969	1687	HMMPfam	PF08305	NPCBM	1303	1450	6e-75	IPR013222	Glycosyl hydrolase family 98, putative carbohydrate-binding module
ZP_02638647.1	Clostridium perfringens CPE str. F4969	1687	HMMPfam	PF08305	NPCBM	1080	1227	7.1e-78	IPR013222	Glycosyl hydrolase family 98, putative carbohydrate-binding module
ZP_02638647.1	Clostridium perfringens CPE str. F4969	1687	HMMPfam	PF07554	FIVAR	1455	1504	0.012	IPR011490	Uncharacterised sugar-binding
ZP_02638647.1	Clostridium perfringens CPE str. F4969	1687	HMMPfam	PF07554	FIVAR	226	282	0.00024	IPR011490	Uncharacterised sugar-binding
ZP_02638647.1	Clostridium perfringens CPE str. F4969	1687	superfamily	SSF49785	Gal_bind_like	295	434	5e-20	IPR008979	Galactose-binding like
ZP_02638647.1	Clostridium perfringens CPE str. F4969	1687	superfamily	SSF49785	Gal_bind_like	70	212	6.9e-21	IPR008979	Galactose-binding like
ZP_02638647.1	Clostridium perfringens CPE str. F4969	1687	superfamily	SSF52058	SSF52058	1536	1603	3.4e-08	NULL	NULL
ZP_02638647.1	Clostridium perfringens CPE str. F4969	1687	PatternScan	PS00599	AA_TRANSFER_CLASS_2	1348	1357	0	IPR001917	Aminotransferase, class-II, pyridoxal-phosphate binding site	Biological Process: metabolic process (GO:0008152), Molecular Function: transferase activity (GO:0016740)
ZP_02638647.1	Clostridium perfringens CPE str. F4969	1687	HMMSmart	SM00776	NPCBM	1305	1450	4.3e-75	IPR013222	Glycosyl hydrolase family 98, putative carbohydrate-binding module
ZP_02638647.1	Clostridium perfringens CPE str. F4969	1687	HMMSmart	SM00776	NPCBM	1081	1227	1.9e-76	IPR013222	Glycosyl hydrolase family 98, putative carbohydrate-binding module
ZP_02638647.1	Clostridium perfringens CPE str. F4969	1687	PatternScan	PS00142	ZINC_PROTEASE	753	762	0	NULL	NULL
ZP_02638647.1	Clostridium perfringens CPE str. F4969	1687	HMMPfam	PF00754	F5_F8_type_C	75	206	6.1e-17	IPR000421	Coagulation factor 5/8 type, C-terminal	Biological Process: cell adhesion (GO:0007155)
ZP_02638647.1	Clostridium perfringens CPE str. F4969	1687	HMMPfam	PF00754	F5_F8_type_C	300	428	1.9e-14	IPR000421	Coagulation factor 5/8 type, C-terminal	Biological Process: cell adhesion (GO:0007155)
ZP_02951972.1	Clostridium perfringens D str. JGS1721	1687	HMMPfam	PF08305	NPCBM	1080	1227	1.1e-77	IPR013222	Glycosyl hydrolase family 98, putative carbohydrate-binding module
ZP_02951972.1	Clostridium perfringens D str. JGS1721	1687	HMMPfam	PF08305	NPCBM	1303	1450	3.4e-76	IPR013222	Glycosyl hydrolase family 98, putative carbohydrate-binding module
ZP_02951972.1	Clostridium perfringens D str. JGS1721	1687	HMMPfam	PF07554	FIVAR	226	282	0.00018	IPR011490	Uncharacterised sugar-binding
ZP_02951972.1	Clostridium perfringens D str. JGS1721	1687	superfamily	SSF49785	Gal_bind_like	70	212	5.3e-21	IPR008979	Galactose-binding like
ZP_02951972.1	Clostridium perfringens D str. JGS1721	1687	superfamily	SSF49785	Gal_bind_like	295	434	2.1e-19	IPR008979	Galactose-binding like
ZP_02951972.1	Clostridium perfringens D str. JGS1721	1687	superfamily	SSF52058	SSF52058	1536	1603	2.1e-07	NULL	NULL
ZP_02951972.1	Clostridium perfringens D str. JGS1721	1687	PatternScan	PS00599	AA_TRANSFER_CLASS_2	1348	1357	0	IPR001917	Aminotransferase, class-II, pyridoxal-phosphate binding site	Biological Process: metabolic process (GO:0008152), Molecular Function: transferase activity (GO:0016740)
ZP_02951972.1	Clostridium perfringens D str. JGS1721	1687	HMMSmart	SM00776	NPCBM	1081	1227	8.8e-76	IPR013222	Glycosyl hydrolase family 98, putative carbohydrate-binding module
ZP_02951972.1	Clostridium perfringens D str. JGS1721	1687	HMMSmart	SM00776	NPCBM	1305	1450	4e-76	IPR013222	Glycosyl hydrolase family 98, putative carbohydrate-binding module
ZP_02951972.1	Clostridium perfringens D str. JGS1721	1687	PatternScan	PS00142	ZINC_PROTEASE	753	762	0	NULL	NULL
ZP_02951972.1	Clostridium perfringens D str. JGS1721	1687	HMMPfam	PF00754	F5_F8_type_C	75	206	6.1e-17	IPR000421	Coagulation factor 5/8 type, C-terminal	Biological Process: cell adhesion (GO:0007155)
ZP_02951972.1	Clostridium perfringens D str. JGS1721	1687	HMMPfam	PF00754	F5_F8_type_C	300	428	5.9e-15	IPR000421	Coagulation factor 5/8 type, C-terminal	Biological Process: cell adhesion (GO:0007155)
ZP_02953260.1	Clostridium perfringens D str. JGS1721	1140	HMMPfam	PF08305	NPCBM	541	684	7.6e-34	IPR013222	Glycosyl hydrolase family 98, putative carbohydrate-binding module
ZP_02953260.1	Clostridium perfringens D str. JGS1721	1140	HMMPfam	PF08305	NPCBM	761	909	2.7e-52	IPR013222	Glycosyl hydrolase family 98, putative carbohydrate-binding module
ZP_02953260.1	Clostridium perfringens D str. JGS1721	1140	HMMPfam	PF08305	NPCBM	985	1134	1.8e-55	IPR013222	Glycosyl hydrolase family 98, putative carbohydrate-binding module
ZP_02953260.1	Clostridium perfringens D str. JGS1721	1140	HMMSmart	SM00776	NPCBM	987	1134	3.8e-59	IPR013222	Glycosyl hydrolase family 98, putative carbohydrate-binding module
ZP_02953260.1	Clostridium perfringens D str. JGS1721	1140	HMMSmart	SM00776	NPCBM	762	909	7.2e-59	IPR013222	Glycosyl hydrolase family 98, putative carbohydrate-binding module
ZP_02953260.1	Clostridium perfringens D str. JGS1721	1140	HMMSmart	SM00776	NPCBM	543	684	7.2e-39	IPR013222	Glycosyl hydrolase family 98, putative carbohydrate-binding module
ZP_02953684.1	Clostridium perfringens D str. JGS1721	2156	HMMPfam	PF08305	NPCBM	1309	1452	1.9e-35	IPR013222	Glycosyl hydrolase family 98, putative carbohydrate-binding module
ZP_02953684.1	Clostridium perfringens D str. JGS1721	2156	HMMPfam	PF08305	NPCBM	1529	1677	1.2e-49	IPR013222	Glycosyl hydrolase family 98, putative carbohydrate-binding module
ZP_02953684.1	Clostridium perfringens D str. JGS1721	2156	HMMPfam	PF08305	NPCBM	1753	1902	3.4e-54	IPR013222	Glycosyl hydrolase family 98, putative carbohydrate-binding module
ZP_02953684.1	Clostridium perfringens D str. JGS1721	2156	HMMPfam	PF07554	FIVAR	1907	1958	0.0003	IPR011490	Uncharacterised sugar-binding
ZP_02953684.1	Clostridium perfringens D str. JGS1721	2156	superfamily	SSF49785	Gal_bind_like	48	208	8.5e-19	IPR008979	Galactose-binding like
ZP_02953684.1	Clostridium perfringens D str. JGS1721	2156	superfamily	SSF49785	Gal_bind_like	272	428	1.7e-20	IPR008979	Galactose-binding like
ZP_02953684.1	Clostridium perfringens D str. JGS1721	2156	superfamily	SSF49785	Gal_bind_like	513	652	2.2e-20	IPR008979	Galactose-binding like
ZP_02953684.1	Clostridium perfringens D str. JGS1721	2156	ProfileScan	PS50022	FA58C_3	54	206	0	IPR000421	Coagulation factor 5/8 type, C-terminal	Biological Process: cell adhesion (GO:0007155)
ZP_02953684.1	Clostridium perfringens D str. JGS1721	2156	ProfileScan	PS50022	FA58C_3	280	426	0	IPR000421	Coagulation factor 5/8 type, C-terminal	Biological Process: cell adhesion (GO:0007155)
ZP_02953684.1	Clostridium perfringens D str. JGS1721	2156	superfamily	SSF52058	SSF52058	1967	2063	2.7e-08	NULL	NULL
ZP_02953684.1	Clostridium perfringens D str. JGS1721	2156	HMMSmart	SM00776	NPCBM	1311	1452	1.5e-40	IPR013222	Glycosyl hydrolase family 98, putative carbohydrate-binding module
ZP_02953684.1	Clostridium perfringens D str. JGS1721	2156	HMMSmart	SM00776	NPCBM	1530	1677	7.7e-56	IPR013222	Glycosyl hydrolase family 98, putative carbohydrate-binding module
ZP_02953684.1	Clostridium perfringens D str. JGS1721	2156	HMMSmart	SM00776	NPCBM	1755	1902	2.9e-59	IPR013222	Glycosyl hydrolase family 98, putative carbohydrate-binding module
ZP_02953684.1	Clostridium perfringens D str. JGS1721	2156	HMMPfam	PF00754	F5_F8_type_C	71	201	2.3e-15	IPR000421	Coagulation factor 5/8 type, C-terminal	Biological Process: cell adhesion (GO:0007155)
ZP_02953684.1	Clostridium perfringens D str. JGS1721	2156	HMMPfam	PF00754	F5_F8_type_C	295	421	1.7e-17	IPR000421	Coagulation factor 5/8 type, C-terminal	Biological Process: cell adhesion (GO:0007155)
ZP_02953684.1	Clostridium perfringens D str. JGS1721	2156	HMMPfam	PF00754	F5_F8_type_C	518	646	3.2e-18	IPR000421	Coagulation factor 5/8 type, C-terminal	Biological Process: cell adhesion (GO:0007155)
ZP_02954286.1	Clostridium perfringens D str. JGS1721	1269	superfamily	SSF49785	Gal_bind_like	782	947	3.9e-20	IPR008979	Galactose-binding like
ZP_02954286.1	Clostridium perfringens D str. JGS1721	1269	ProfileScan	PS50022	FA58C_3	790	950	0	IPR000421	Coagulation factor 5/8 type, C-terminal	Biological Process: cell adhesion (GO:0007155)
ZP_02954286.1	Clostridium perfringens D str. JGS1721	1269	PatternScan	PS00142	ZINC_PROTEASE	327	336	0	NULL	NULL
ZP_02954286.1	Clostridium perfringens D str. JGS1721	1269	HMMPfam	PF00754	F5_F8_type_C	807	945	6.6e-12	IPR000421	Coagulation factor 5/8 type, C-terminal	Biological Process: cell adhesion (GO:0007155)
ZP_02631053.1	Clostridium perfringens E str. JGS1987	2156	HMMPfam	PF08305	NPCBM	1753	1902	2.1e-55	IPR013222	Glycosyl hydrolase family 98, putative carbohydrate-binding module
ZP_02631053.1	Clostridium perfringens E str. JGS1987	2156	HMMPfam	PF08305	NPCBM	1529	1677	9.9e-52	IPR013222	Glycosyl hydrolase family 98, putative carbohydrate-binding module
ZP_02631053.1	Clostridium perfringens E str. JGS1987	2156	HMMPfam	PF08305	NPCBM	1308	1452	3.9e-35	IPR013222	Glycosyl hydrolase family 98, putative carbohydrate-binding module
ZP_02631053.1	Clostridium perfringens E str. JGS1987	2156	HMMPfam	PF07554	FIVAR	1907	1958	0.00045	IPR011490	Uncharacterised sugar-binding
ZP_02631053.1	Clostridium perfringens E str. JGS1987	2156	superfamily	SSF49785	Gal_bind_like	513	652	7.9e-20	IPR008979	Galactose-binding like
ZP_02631053.1	Clostridium perfringens E str. JGS1987	2156	superfamily	SSF49785	Gal_bind_like	272	428	6.2e-20	IPR008979	Galactose-binding like
ZP_02631053.1	Clostridium perfringens E str. JGS1987	2156	superfamily	SSF49785	Gal_bind_like	66	207	1.9e-19	IPR008979	Galactose-binding like
ZP_02631053.1	Clostridium perfringens E str. JGS1987	2156	ProfileScan	PS50022	FA58C_3	280	426	0	IPR000421	Coagulation factor 5/8 type, C-terminal	Biological Process: cell adhesion (GO:0007155)
ZP_02631053.1	Clostridium perfringens E str. JGS1987	2156	ProfileScan	PS50022	FA58C_3	60	206	0	IPR000421	Coagulation factor 5/8 type, C-terminal	Biological Process: cell adhesion (GO:0007155)
ZP_02631053.1	Clostridium perfringens E str. JGS1987	2156	superfamily	SSF52058	SSF52058	1967	2063	4.5e-08	NULL	NULL
ZP_02631053.1	Clostridium perfringens E str. JGS1987	2156	HMMSmart	SM00776	NPCBM	1755	1902	1.1e-59	IPR013222	Glycosyl hydrolase family 98, putative carbohydrate-binding module
ZP_02631053.1	Clostridium perfringens E str. JGS1987	2156	HMMSmart	SM00776	NPCBM	1530	1677	3.9e-58	IPR013222	Glycosyl hydrolase family 98, putative carbohydrate-binding module
ZP_02631053.1	Clostridium perfringens E str. JGS1987	2156	HMMSmart	SM00776	NPCBM	1311	1452	2e-40	IPR013222	Glycosyl hydrolase family 98, putative carbohydrate-binding module
ZP_02631053.1	Clostridium perfringens E str. JGS1987	2156	HMMPfam	PF00754	F5_F8_type_C	71	201	3.6e-16	IPR000421	Coagulation factor 5/8 type, C-terminal	Biological Process: cell adhesion (GO:0007155)
ZP_02631053.1	Clostridium perfringens E str. JGS1987	2156	HMMPfam	PF00754	F5_F8_type_C	518	646	5.6e-17	IPR000421	Coagulation factor 5/8 type, C-terminal	Biological Process: cell adhesion (GO:0007155)
ZP_02631053.1	Clostridium perfringens E str. JGS1987	2156	HMMPfam	PF00754	F5_F8_type_C	295	421	1.8e-17	IPR000421	Coagulation factor 5/8 type, C-terminal	Biological Process: cell adhesion (GO:0007155)
ZP_02641714.1	Clostridium perfringens NCTC 8239	2142	HMMPfam	PF08305	NPCBM	1515	1663	9.2e-54	IPR013222	Glycosyl hydrolase family 98, putative carbohydrate-binding module
ZP_02641714.1	Clostridium perfringens NCTC 8239	2142	HMMPfam	PF08305	NPCBM	1739	1888	1.6e-56	IPR013222	Glycosyl hydrolase family 98, putative carbohydrate-binding module
ZP_02641714.1	Clostridium perfringens NCTC 8239	2142	HMMPfam	PF08305	NPCBM	1295	1438	6.2e-35	IPR013222	Glycosyl hydrolase family 98, putative carbohydrate-binding module
ZP_02641714.1	Clostridium perfringens NCTC 8239	2142	HMMPfam	PF07554	FIVAR	1893	1944	0.0003	IPR011490	Uncharacterised sugar-binding
ZP_02641714.1	Clostridium perfringens NCTC 8239	2142	superfamily	SSF49785	Gal_bind_like	513	652	2.9e-20	IPR008979	Galactose-binding like
ZP_02641714.1	Clostridium perfringens NCTC 8239	2142	superfamily	SSF49785	Gal_bind_like	272	428	3.1e-20	IPR008979	Galactose-binding like
ZP_02641714.1	Clostridium perfringens NCTC 8239	2142	superfamily	SSF49785	Gal_bind_like	54	208	9.8e-20	IPR008979	Galactose-binding like
ZP_02641714.1	Clostridium perfringens NCTC 8239	2142	superfamily	SSF52058	SSF52058	1953	2049	1.6e-08	NULL	NULL
ZP_02641714.1	Clostridium perfringens NCTC 8239	2142	HMMSmart	SM00776	NPCBM	1741	1888	9.2e-61	IPR013222	Glycosyl hydrolase family 98, putative carbohydrate-binding module
ZP_02641714.1	Clostridium perfringens NCTC 8239	2142	HMMSmart	SM00776	NPCBM	1516	1663	2.4e-60	IPR013222	Glycosyl hydrolase family 98, putative carbohydrate-binding module
ZP_02641714.1	Clostridium perfringens NCTC 8239	2142	HMMSmart	SM00776	NPCBM	1297	1438	6.5e-40	IPR013222	Glycosyl hydrolase family 98, putative carbohydrate-binding module
ZP_02641714.1	Clostridium perfringens NCTC 8239	2142	ProfileScan	PS50022	FA58C_3	280	426	0	IPR000421	Coagulation factor 5/8 type, C-terminal	Biological Process: cell adhesion (GO:0007155)
ZP_02641714.1	Clostridium perfringens NCTC 8239	2142	ProfileScan	PS50022	FA58C_3	53	206	0	IPR000421	Coagulation factor 5/8 type, C-terminal	Biological Process: cell adhesion (GO:0007155)
ZP_02641714.1	Clostridium perfringens NCTC 8239	2142	PatternScan	PS00142	ZINC_PROTEASE	969	978	0	NULL	NULL
ZP_02641714.1	Clostridium perfringens NCTC 8239	2142	HMMPfam	PF00754	F5_F8_type_C	518	646	2.4e-17	IPR000421	Coagulation factor 5/8 type, C-terminal	Biological Process: cell adhesion (GO:0007155)
ZP_02641714.1	Clostridium perfringens NCTC 8239	2142	HMMPfam	PF00754	F5_F8_type_C	295	421	5.2e-17	IPR000421	Coagulation factor 5/8 type, C-terminal	Biological Process: cell adhesion (GO:0007155)
ZP_02641714.1	Clostridium perfringens NCTC 8239	2142	HMMPfam	PF00754	F5_F8_type_C	71	201	2.9e-16	IPR000421	Coagulation factor 5/8 type, C-terminal	Biological Process: cell adhesion (GO:0007155)
ZP_02642699.1	Clostridium perfringens NCTC 8239	1687	HMMPfam	PF08305	NPCBM	1080	1227	7.1e-78	IPR013222	Glycosyl hydrolase family 98, putative carbohydrate-binding module
ZP_02642699.1	Clostridium perfringens NCTC 8239	1687	HMMPfam	PF08305	NPCBM	1303	1450	3.4e-76	IPR013222	Glycosyl hydrolase family 98, putative carbohydrate-binding module
ZP_02642699.1	Clostridium perfringens NCTC 8239	1687	HMMPfam	PF07554	FIVAR	226	282	0.00024	IPR011490	Uncharacterised sugar-binding
ZP_02642699.1	Clostridium perfringens NCTC 8239	1687	HMMPfam	PF07554	FIVAR	1455	1504	0.05	IPR011490	Uncharacterised sugar-binding
ZP_02642699.1	Clostridium perfringens NCTC 8239	1687	superfamily	SSF49785	Gal_bind_like	295	434	5e-20	IPR008979	Galactose-binding like
ZP_02642699.1	Clostridium perfringens NCTC 8239	1687	superfamily	SSF49785	Gal_bind_like	70	212	6.9e-21	IPR008979	Galactose-binding like
ZP_02642699.1	Clostridium perfringens NCTC 8239	1687	superfamily	SSF52058	SSF52058	1536	1603	4.6e-08	NULL	NULL
ZP_02642699.1	Clostridium perfringens NCTC 8239	1687	PatternScan	PS00599	AA_TRANSFER_CLASS_2	1348	1357	0	IPR001917	Aminotransferase, class-II, pyridoxal-phosphate binding site	Biological Process: metabolic process (GO:0008152), Molecular Function: transferase activity (GO:0016740)
ZP_02642699.1	Clostridium perfringens NCTC 8239	1687	HMMSmart	SM00776	NPCBM	1081	1227	1.9e-76	IPR013222	Glycosyl hydrolase family 98, putative carbohydrate-binding module
ZP_02642699.1	Clostridium perfringens NCTC 8239	1687	HMMSmart	SM00776	NPCBM	1305	1450	4e-76	IPR013222	Glycosyl hydrolase family 98, putative carbohydrate-binding module
ZP_02642699.1	Clostridium perfringens NCTC 8239	1687	PatternScan	PS00142	ZINC_PROTEASE	753	762	0	NULL	NULL
ZP_02642699.1	Clostridium perfringens NCTC 8239	1687	HMMPfam	PF00754	F5_F8_type_C	300	428	1.9e-14	IPR000421	Coagulation factor 5/8 type, C-terminal	Biological Process: cell adhesion (GO:0007155)
ZP_02642699.1	Clostridium perfringens NCTC 8239	1687	HMMPfam	PF00754	F5_F8_type_C	75	206	6.1e-17	IPR000421	Coagulation factor 5/8 type, C-terminal	Biological Process: cell adhesion (GO:0007155)
YP_698600.1	Clostridium perfringens SM101	1465	HMMPfam	PF08305	NPCBM	858	1005	1.2e-74	IPR013222	Glycosyl hydrolase family 98, putative carbohydrate-binding module
YP_698600.1	Clostridium perfringens SM101	1465	HMMPfam	PF08305	NPCBM	1081	1228	3.1e-75	IPR013222	Glycosyl hydrolase family 98, putative carbohydrate-binding module
YP_698600.1	Clostridium perfringens SM101	1465	superfamily	SSF49785	Gal_bind_like	70	212	8.7e-21	IPR008979	Galactose-binding like
YP_698600.1	Clostridium perfringens SM101	1465	PatternScan	PS00142	ZINC_PROTEASE	531	540	0	NULL	NULL
YP_698600.1	Clostridium perfringens SM101	1465	superfamily	SSF52058	SSF52058	1314	1381	1.3e-07	NULL	NULL
YP_698600.1	Clostridium perfringens SM101	1465	PatternScan	PS00599	AA_TRANSFER_CLASS_2	1126	1135	0	IPR001917	Aminotransferase, class-II, pyridoxal-phosphate binding site	Biological Process: metabolic process (GO:0008152), Molecular Function: transferase activity (GO:0016740)
YP_698600.1	Clostridium perfringens SM101	1465	HMMSmart	SM00776	NPCBM	859	1005	4.3e-74	IPR013222	Glycosyl hydrolase family 98, putative carbohydrate-binding module
YP_698600.1	Clostridium perfringens SM101	1465	HMMSmart	SM00776	NPCBM	1083	1228	5.3e-75	IPR013222	Glycosyl hydrolase family 98, putative carbohydrate-binding module
YP_698600.1	Clostridium perfringens SM101	1465	HMMPfam	PF00754	F5_F8_type_C	75	206	4.6e-17	IPR000421	Coagulation factor 5/8 type, C-terminal	Biological Process: cell adhesion (GO:0007155)
NP_562197.1	Clostridium perfringens str. 13	1687	HMMPfam	PF08305	NPCBM	1080	1227	7.1e-78	IPR013222	Glycosyl hydrolase family 98, putative carbohydrate-binding module
NP_562197.1	Clostridium perfringens str. 13	1687	HMMPfam	PF08305	NPCBM	1303	1450	7.4e-77	IPR013222	Glycosyl hydrolase family 98, putative carbohydrate-binding module
NP_562197.1	Clostridium perfringens str. 13	1687	superfamily	SSF49785	Gal_bind_like	70	212	2.9e-22	IPR008979	Galactose-binding like
NP_562197.1	Clostridium perfringens str. 13	1687	superfamily	SSF49785	Gal_bind_like	295	434	5e-20	IPR008979	Galactose-binding like
NP_562197.1	Clostridium perfringens str. 13	1687	superfamily	SSF52058	SSF52058	1536	1603	3.4e-08	NULL	NULL
NP_562197.1	Clostridium perfringens str. 13	1687	PatternScan	PS00599	AA_TRANSFER_CLASS_2	1348	1357	0	IPR001917	Aminotransferase, class-II, pyridoxal-phosphate binding site	Biological Process: metabolic process (GO:0008152), Molecular Function: transferase activity (GO:0016740)
NP_562197.1	Clostridium perfringens str. 13	1687	HMMSmart	SM00776	NPCBM	1081	1227	3.6e-72	IPR013222	Glycosyl hydrolase family 98, putative carbohydrate-binding module
NP_562197.1	Clostridium perfringens str. 13	1687	HMMSmart	SM00776	NPCBM	1305	1450	6.9e-73	IPR013222	Glycosyl hydrolase family 98, putative carbohydrate-binding module
NP_562197.1	Clostridium perfringens str. 13	1687	PatternScan	PS00142	ZINC_PROTEASE	753	762	0	NULL	NULL
NP_562197.1	Clostridium perfringens str. 13	1687	HMMPfam	PF07554	FIVAR	226	282	0.00024	IPR011490	Uncharacterised sugar-binding
NP_562197.1	Clostridium perfringens str. 13	1687	HMMPfam	PF07554	FIVAR	1455	1504	0.00098	IPR011490	Uncharacterised sugar-binding
NP_562197.1	Clostridium perfringens str. 13	1687	HMMPfam	PF00754	F5_F8_type_C	75	206	2.2e-16	IPR000421	Coagulation factor 5/8 type, C-terminal	Biological Process: cell adhesion (GO:0007155)
NP_562197.1	Clostridium perfringens str. 13	1687	HMMPfam	PF00754	F5_F8_type_C	300	428	1.9e-14	IPR000421	Coagulation factor 5/8 type, C-terminal	Biological Process: cell adhesion (GO:0007155)
ZP_02426874.1	Clostridium ramosum DSM 1402	1739	HMMPfam	PF00041	fn3	410	491	5.7	IPR003961	Fibronectin, type III
ZP_02426874.1	Clostridium ramosum DSM 1402	1739	HMMPfam	PF00041	fn3	508	587	6.3e-07	IPR003961	Fibronectin, type III
ZP_02426874.1	Clostridium ramosum DSM 1402	1739	HMMSmart	SM00060	FN3	508	584	5.2e-11	IPR003961	Fibronectin, type III
ZP_02426874.1	Clostridium ramosum DSM 1402	1739	HMMSmart	SM00060	FN3	410	488	1.4e-06	IPR003961	Fibronectin, type III
ZP_02426874.1	Clostridium ramosum DSM 1402	1739	superfamily	SSF49785	Gal_bind_like	1415	1578	2e-08	IPR008979	Galactose-binding like
ZP_02426874.1	Clostridium ramosum DSM 1402	1739	PatternScan	PS00018	EF_HAND_1	210	222	0	IPR018247	EF-HAND 1
ZP_02426874.1	Clostridium ramosum DSM 1402	1739	PatternScan	PS00142	ZINC_PROTEASE	1141	1150	0	NULL	NULL
ZP_02426874.1	Clostridium ramosum DSM 1402	1739	superfamily	SSF49265	FN_III-like	494	603	2e-16	IPR008957	Fibronectin, type III-like fold
ZP_02426874.1	Clostridium ramosum DSM 1402	1739	superfamily	SSF49265	FN_III-like	409	504	8e-09	IPR008957	Fibronectin, type III-like fold
ZP_02426874.1	Clostridium ramosum DSM 1402	1739	ProfileScan	PS50853	FN3	508	594	0	IPR003961	Fibronectin, type III
ZP_02426874.1	Clostridium ramosum DSM 1402	1739	ProfileScan	PS50853	FN3	409	498	0	IPR003961	Fibronectin, type III
ZP_05129649.1	Clostridium sp. 7_2_43FAA	2664	HMMPfam	PF08305	NPCBM	1530	1673	2.4e-45	IPR013222	Glycosyl hydrolase family 98, putative carbohydrate-binding module
ZP_05129649.1	Clostridium sp. 7_2_43FAA	2664	HMMPfam	PF08305	NPCBM	2044	2191	4.3e-37	IPR013222	Glycosyl hydrolase family 98, putative carbohydrate-binding module
ZP_05129649.1	Clostridium sp. 7_2_43FAA	2664	HMMPfam	PF08305	NPCBM	2269	2417	2.6e-49	IPR013222	Glycosyl hydrolase family 98, putative carbohydrate-binding module
ZP_05129649.1	Clostridium sp. 7_2_43FAA	2664	HMMPfam	PF07554	FIVAR	2424	2475	1.6e-06	IPR011490	Uncharacterised sugar-binding
ZP_05129649.1	Clostridium sp. 7_2_43FAA	2664	HMMPfam	PF07523	Big_3	1463	1531	0.033	IPR011080	Bacterial Ig-like
ZP_05129649.1	Clostridium sp. 7_2_43FAA	2664	HMMPfam	PF07523	Big_3	2198	2268	0.0053	IPR011080	Bacterial Ig-like
ZP_05129649.1	Clostridium sp. 7_2_43FAA	2664	HMMPfam	PF00754	F5_F8_type_C	75	206	2.9e-19	IPR000421	Coagulation factor 5/8 type, C-terminal	Biological Process: cell adhesion (GO:0007155)
ZP_05129649.1	Clostridium sp. 7_2_43FAA	2664	HMMPfam	PF00754	F5_F8_type_C	303	431	1.9e-19	IPR000421	Coagulation factor 5/8 type, C-terminal	Biological Process: cell adhesion (GO:0007155)
ZP_05129649.1	Clostridium sp. 7_2_43FAA	2664	HMMPfam	PF00754	F5_F8_type_C	528	655	2.2e-10	IPR000421	Coagulation factor 5/8 type, C-terminal	Biological Process: cell adhesion (GO:0007155)
ZP_05129649.1	Clostridium sp. 7_2_43FAA	2664	HMMPfam	PF00754	F5_F8_type_C	749	877	2e-17	IPR000421	Coagulation factor 5/8 type, C-terminal	Biological Process: cell adhesion (GO:0007155)
ZP_05129649.1	Clostridium sp. 7_2_43FAA	2664	HMMPfam	PF00754	F5_F8_type_C	1777	1905	4e-17	IPR000421	Coagulation factor 5/8 type, C-terminal	Biological Process: cell adhesion (GO:0007155)
ZP_05129649.1	Clostridium sp. 7_2_43FAA	2664	superfamily	SSF49785	Galactose-binding domain-like	280	438	3.2e-21	IPR008979	Galactose-binding like
ZP_05129649.1	Clostridium sp. 7_2_43FAA	2664	superfamily	SSF49785	Galactose-binding domain-like	744	883	3.7e-21	IPR008979	Galactose-binding like
ZP_05129649.1	Clostridium sp. 7_2_43FAA	2664	superfamily	SSF49785	Galactose-binding domain-like	1770	1911	9e-21	IPR008979	Galactose-binding like
ZP_05129649.1	Clostridium sp. 7_2_43FAA	2664	superfamily	SSF49785	Galactose-binding domain-like	70	212	1.2e-20	IPR008979	Galactose-binding like
ZP_05129649.1	Clostridium sp. 7_2_43FAA	2664	superfamily	SSF49785	Galactose-binding domain-like	523	661	4.3e-17	IPR008979	Galactose-binding like
ZP_05129649.1	Clostridium sp. 7_2_43FAA	2664	superfamily	SSF52058	L domain-like	2518	2576	2.8e-10	NULL	NULL
ZP_05129649.1	Clostridium sp. 7_2_43FAA	2664	ProfileScan	PS50022	FA58C_3	285	436	8.72	IPR000421	Coagulation factor 5/8 type, C-terminal	Biological Process: cell adhesion (GO:0007155)
ZP_05129649.1	Clostridium sp. 7_2_43FAA	2664	ProfileScan	PS50022	FA58C_3	1756	1910	14.291	IPR000421	Coagulation factor 5/8 type, C-terminal	Biological Process: cell adhesion (GO:0007155)
ZP_05129649.1	Clostridium sp. 7_2_43FAA	2664	HMMSmart	SM00776	no description	1532	1673	8.4e-47	IPR013222	Glycosyl hydrolase family 98, putative carbohydrate-binding module
ZP_05129649.1	Clostridium sp. 7_2_43FAA	2664	HMMSmart	SM00776	no description	2046	2191	1.3e-36	IPR013222	Glycosyl hydrolase family 98, putative carbohydrate-binding module
ZP_05129649.1	Clostridium sp. 7_2_43FAA	2664	HMMSmart	SM00776	no description	2271	2417	1.6e-48	IPR013222	Glycosyl hydrolase family 98, putative carbohydrate-binding module
YP_003182171.1	Eggerthella lenta DSM 2243	1787	HMMPfam	PF00041	fn3	440	520	0.0037	IPR003961	Fibronectin, type III
YP_003182171.1	Eggerthella lenta DSM 2243	1787	HMMPfam	PF00041	fn3	533	613	2.7e-10	IPR003961	Fibronectin, type III
YP_003182171.1	Eggerthella lenta DSM 2243	1787	HMMSmart	SM00060	no description	440	517	6.4	IPR003961	Fibronectin, type III
YP_003182171.1	Eggerthella lenta DSM 2243	1787	HMMSmart	SM00060	no description	533	610	0.00058	IPR003961	Fibronectin, type III
YP_003182171.1	Eggerthella lenta DSM 2243	1787	PatternScan	PS00018	EF_HAND_1	241	253	NA	IPR018247	EF-HAND 1
YP_003182171.1	Eggerthella lenta DSM 2243	1787	PatternScan	PS00687	ALDEHYDE_DEHYDR_GLU	1776	1783	NA	IPR016160	Aldehyde dehydrogenase, conserved site	Biological Process: metabolic process (GO:0008152), Molecular Function: oxidoreductase activity (GO:0016491)
YP_003182171.1	Eggerthella lenta DSM 2243	1787	superfamily	SSF49785	Galactose-binding domain-like	1505	1627	1e-18	IPR008979	Galactose-binding like
YP_003182171.1	Eggerthella lenta DSM 2243	1787	superfamily	SSF49265	Fibronectin type III	532	620	3e-12	IPR008957	Fibronectin, type III-like fold
YP_003182171.1	Eggerthella lenta DSM 2243	1787	superfamily	SSF49265	Fibronectin type III	439	529	7.3e-08	IPR008957	Fibronectin, type III-like fold
YP_003182171.1	Eggerthella lenta DSM 2243	1787	superfamily	SSF63446	Type I dockerin domain	205	272	2.5e-06	IPR016134	Cellulosome enzyme, dockerin type I	Biological Process: polysaccharide catabolic process (GO:0000272)
YP_003182171.1	Eggerthella lenta DSM 2243	1787	superfamily	SSF49785	Galactose-binding domain-like	647	796	0.0041	IPR008979	Galactose-binding like
YP_003182171.1	Eggerthella lenta DSM 2243	1787	ProfileScan	PS50022	FA58C_3	1475	1625	16.803	IPR000421	Coagulation factor 5/8 type, C-terminal	Biological Process: cell adhesion (GO:0007155)
YP_003182171.1	Eggerthella lenta DSM 2243	1787	ProfileScan	PS50853	FN3	439	527	11.549	IPR003961	Fibronectin, type III
YP_003182171.1	Eggerthella lenta DSM 2243	1787	ProfileScan	PS50853	FN3	533	619	14.427	IPR003961	Fibronectin, type III
YP_003182171.1	Eggerthella lenta DSM 2243	1787	HMMPfam	PF00754	F5_F8_type_C	1498	1620	2.5e-14	IPR000421	Coagulation factor 5/8 type, C-terminal	Biological Process: cell adhesion (GO:0007155)
XP_001737701.1	Entamoeba dispar SAW760	1114	superfamily	SSF49785	Gal_bind_like	870	989	2.8e-17	IPR008979	Galactose-binding like
XP_654508.1	Entamoeba histolytica HM-1:IMSS	1113	superfamily	SSF49785	Galactose-binding domain-like	867	988	3e-16	IPR008979	Galactose-binding like
ZP_02900937.1	Escherichia albertii TW07627	1515	ProfileScan	PS51257	PROKAR_LIPOPROTEIN	1	24	0	NULL	NULL
ZP_02900937.1	Escherichia albertii TW07627	1515	PatternScan	PS00178	AA_TRNA_LIGASE_I	82	93	0	IPR001412	Aminoacyl-tRNA synthetase, class I, conserved site	Molecular Function: nucleotide binding (GO:0000166), Molecular Function: aminoacyl-tRNA ligase activity (GO:0004812), Molecular Function: ATP binding (GO:0005524), Cellular Component: cytoplasm (GO:0005737), Biological Process: translation (GO:0006412), Biological Process: tRNA aminoacylation for protein translation (GO:0006418)
ZP_03068889.1	Escherichia coli 101-1	1521	ProfileScan	PS51257	PROKAR_LIPOPROTEIN	1	24	0	NULL	NULL
ZP_03068889.1	Escherichia coli 101-1	1521	PatternScan	PS00178	AA_TRNA_LIGASE_I	88	99	0	IPR001412	Aminoacyl-tRNA synthetase, class I, conserved site	Molecular Function: nucleotide binding (GO:0000166), Molecular Function: aminoacyl-tRNA ligase activity (GO:0004812), Molecular Function: ATP binding (GO:0005524), Cellular Component: cytoplasm (GO:0005737), Biological Process: translation (GO:0006412), Biological Process: tRNA aminoacylation for protein translation (GO:0006418)
ZP_03068889.1	Escherichia coli 101-1	1521	HMMPfam	PF01011	PQQ	794	819	0.43	IPR002372	Pyrrolo-quinoline quinone repeat
YP_670934.1	Escherichia coli 536	1521	PatternScan	PS00178	AA_TRNA_LIGASE_I	88	99	NA	IPR001412	Aminoacyl-tRNA synthetase, class I, conserved site	Molecular Function: nucleotide binding (GO:0000166), Molecular Function: aminoacyl-tRNA ligase activity (GO:0004812), Molecular Function: ATP binding (GO:0005524), Cellular Component: cytoplasm (GO:0005737), Biological Process: translation (GO:0006412), Biological Process: tRNA aminoacylation for protein translation (GO:0006418)
YP_670934.1	Escherichia coli 536	1521	ProfileScan	PS51257	PROKAR_LIPOPROTEIN	1	24	7	NULL	NULL
YP_670934.1	Escherichia coli 536	1521	HMMPfam	PF01011	PQQ	794	819	0.0002	IPR002372	Pyrrolo-quinoline quinone repeat
ZP_02998968.1	Escherichia coli 53638	1505	PatternScan	PS00178	AA_TRNA_LIGASE_I	73	84	0	IPR001412	Aminoacyl-tRNA synthetase, class I, conserved site	Molecular Function: nucleotide binding (GO:0000166), Molecular Function: aminoacyl-tRNA ligase activity (GO:0004812), Molecular Function: ATP binding (GO:0005524), Cellular Component: cytoplasm (GO:0005737), Biological Process: translation (GO:0006412), Biological Process: tRNA aminoacylation for protein translation (GO:0006418)
ZP_02998968.1	Escherichia coli 53638	1505	HMMPfam	PF01011	PQQ	778	803	0.43	IPR002372	Pyrrolo-quinoline quinone repeat
YP_002404344.1	Escherichia coli 55989	1527	PatternScan	PS00178	AA_TRNA_LIGASE_I	94	105	NA	IPR001412	Aminoacyl-tRNA synthetase, class I, conserved site	Molecular Function: nucleotide binding (GO:0000166), Molecular Function: aminoacyl-tRNA ligase activity (GO:0004812), Molecular Function: ATP binding (GO:0005524), Cellular Component: cytoplasm (GO:0005737), Biological Process: translation (GO:0006412), Biological Process: tRNA aminoacylation for protein translation (GO:0006418)
ZP_04005476.1	Escherichia coli 83972	1518	ProfileScan	PS51257	PROKAR_LIPOPROTEIN	1	24	7	NULL	NULL
ZP_04005476.1	Escherichia coli 83972	1518	PatternScan	PS00178	AA_TRNA_LIGASE_I	86	97	NA	IPR001412	Aminoacyl-tRNA synthetase, class I, conserved site	Molecular Function: nucleotide binding (GO:0000166), Molecular Function: aminoacyl-tRNA ligase activity (GO:0004812), Molecular Function: ATP binding (GO:0005524), Cellular Component: cytoplasm (GO:0005737), Biological Process: translation (GO:0006412), Biological Process: tRNA aminoacylation for protein translation (GO:0006418)
ZP_04005476.1	Escherichia coli 83972	1518	HMMPfam	PF01011	PQQ	791	816	0.0002	IPR002372	Pyrrolo-quinoline quinone repeat
YP_003046028.1	Escherichia coli B str. REL606	1517	PatternScan	PS00178	AA_TRNA_LIGASE_I	86	97	NA	IPR001412	Aminoacyl-tRNA synthetase, class I, conserved site	Molecular Function: nucleotide binding (GO:0000166), Molecular Function: aminoacyl-tRNA ligase activity (GO:0004812), Molecular Function: ATP binding (GO:0005524), Cellular Component: cytoplasm (GO:0005737), Biological Process: translation (GO:0006412), Biological Process: tRNA aminoacylation for protein translation (GO:0006418)
YP_003046028.1	Escherichia coli B str. REL606	1517	ProfileScan	PS51257	PROKAR_LIPOPROTEIN	1	24	7	NULL	NULL
ZP_03030866.1	Escherichia coli B7A	1522	ProfileScan	PS51257	PROKAR_LIPOPROTEIN	1	24	0	NULL	NULL
ZP_03030866.1	Escherichia coli B7A	1522	PatternScan	PS00178	AA_TRNA_LIGASE_I	88	99	0	IPR001412	Aminoacyl-tRNA synthetase, class I, conserved site	Molecular Function: nucleotide binding (GO:0000166), Molecular Function: aminoacyl-tRNA ligase activity (GO:0004812), Molecular Function: ATP binding (GO:0005524), Cellular Component: cytoplasm (GO:0005737), Biological Process: translation (GO:0006412), Biological Process: tRNA aminoacylation for protein translation (GO:0006418)
ZP_03030866.1	Escherichia coli B7A	1522	HMMPfam	PF01011	PQQ	795	820	0.43	IPR002372	Pyrrolo-quinoline quinone repeat
ZP_03048261.1	Escherichia coli E110019	1476	PatternScan	PS00178	AA_TRNA_LIGASE_I	44	55	0	IPR001412	Aminoacyl-tRNA synthetase, class I, conserved site	Molecular Function: nucleotide binding (GO:0000166), Molecular Function: aminoacyl-tRNA ligase activity (GO:0004812), Molecular Function: ATP binding (GO:0005524), Cellular Component: cytoplasm (GO:0005737), Biological Process: translation (GO:0006412), Biological Process: tRNA aminoacylation for protein translation (GO:0006418)
ZP_03043208.1	Escherichia coli E22	1477	PatternScan	PS00178	AA_TRNA_LIGASE_I	44	55	0	IPR001412	Aminoacyl-tRNA synthetase, class I, conserved site	Molecular Function: nucleotide binding (GO:0000166), Molecular Function: aminoacyl-tRNA ligase activity (GO:0004812), Molecular Function: ATP binding (GO:0005524), Cellular Component: cytoplasm (GO:0005737), Biological Process: translation (GO:0006412), Biological Process: tRNA aminoacylation for protein translation (GO:0006418)
ZP_03043208.1	Escherichia coli E22	1477	HMMPfam	PF01011	PQQ	751	776	0.43	IPR002372	Pyrrolo-quinoline quinone repeat
YP_001464429.1	Escherichia coli E24377A	1506	PatternScan	PS00178	AA_TRNA_LIGASE_I	73	84	0	IPR001412	Aminoacyl-tRNA synthetase, class I, conserved site	Molecular Function: nucleotide binding (GO:0000166), Molecular Function: aminoacyl-tRNA ligase activity (GO:0004812), Molecular Function: ATP binding (GO:0005524), Cellular Component: cytoplasm (GO:0005737), Biological Process: translation (GO:0006412), Biological Process: tRNA aminoacylation for protein translation (GO:0006418)
YP_002399471.1	Escherichia coli ED1a	1526	PatternScan	PS00178	AA_TRNA_LIGASE_I	94	105	NA	IPR001412	Aminoacyl-tRNA synthetase, class I, conserved site	Molecular Function: nucleotide binding (GO:0000166), Molecular Function: aminoacyl-tRNA ligase activity (GO:0004812), Molecular Function: ATP binding (GO:0005524), Cellular Component: cytoplasm (GO:0005737), Biological Process: translation (GO:0006412), Biological Process: tRNA aminoacylation for protein translation (GO:0006418)
ZP_03033388.1	Escherichia coli F11	1520	ProfileScan	PS51257	PROKAR_LIPOPROTEIN	1	24	0	NULL	NULL
ZP_03033388.1	Escherichia coli F11	1520	PatternScan	PS00178	AA_TRNA_LIGASE_I	90	101	0	IPR001412	Aminoacyl-tRNA synthetase, class I, conserved site	Molecular Function: nucleotide binding (GO:0000166), Molecular Function: aminoacyl-tRNA ligase activity (GO:0004812), Molecular Function: ATP binding (GO:0005524), Cellular Component: cytoplasm (GO:0005737), Biological Process: translation (GO:0006412), Biological Process: tRNA aminoacylation for protein translation (GO:0006418)
YP_001459760.1	Escherichia coli HS	1503	PatternScan	PS00178	AA_TRNA_LIGASE_I	73	84	0	IPR001412	Aminoacyl-tRNA synthetase, class I, conserved site	Molecular Function: nucleotide binding (GO:0000166), Molecular Function: aminoacyl-tRNA ligase activity (GO:0004812), Molecular Function: ATP binding (GO:0005524), Cellular Component: cytoplasm (GO:0005737), Biological Process: translation (GO:0006412), Biological Process: tRNA aminoacylation for protein translation (GO:0006418)
YP_002388453.1	Escherichia coli IAI1	1525	ProfileScan	PS51257	PROKAR_LIPOPROTEIN	1	24	7	NULL	NULL
YP_002388453.1	Escherichia coli IAI1	1525	PatternScan	PS00178	AA_TRNA_LIGASE_I	92	103	NA	IPR001412	Aminoacyl-tRNA synthetase, class I, conserved site	Molecular Function: nucleotide binding (GO:0000166), Molecular Function: aminoacyl-tRNA ligase activity (GO:0004812), Molecular Function: ATP binding (GO:0005524), Cellular Component: cytoplasm (GO:0005737), Biological Process: translation (GO:0006412), Biological Process: tRNA aminoacylation for protein translation (GO:0006418)
YP_002409370.1	Escherichia coli IAI39	1524	HMMPfam	PF01011	PQQ	797	822	0.0002	IPR002372	Pyrrolo-quinoline quinone repeat
YP_002409370.1	Escherichia coli IAI39	1524	PatternScan	PS00178	AA_TRNA_LIGASE_I	92	103	NA	IPR001412	Aminoacyl-tRNA synthetase, class I, conserved site	Molecular Function: nucleotide binding (GO:0000166), Molecular Function: aminoacyl-tRNA ligase activity (GO:0004812), Molecular Function: ATP binding (GO:0005524), Cellular Component: cytoplasm (GO:0005737), Biological Process: translation (GO:0006412), Biological Process: tRNA aminoacylation for protein translation (GO:0006418)
YP_003236130.1	Escherichia coli O111:H- str. 11128	1521	HMMPfam	PF01011	PQQ	795	820	0.0002	IPR002372	Pyrrolo-quinoline quinone repeat
YP_003236130.1	Escherichia coli O111:H- str. 11128	1521	ProfileScan	PS51257	PROKAR_LIPOPROTEIN	1	24	7	NULL	NULL
YP_003236130.1	Escherichia coli O111:H- str. 11128	1521	PatternScan	PS00178	AA_TRNA_LIGASE_I	88	99	NA	IPR001412	Aminoacyl-tRNA synthetase, class I, conserved site	Molecular Function: nucleotide binding (GO:0000166), Molecular Function: aminoacyl-tRNA ligase activity (GO:0004812), Molecular Function: ATP binding (GO:0005524), Cellular Component: cytoplasm (GO:0005737), Biological Process: translation (GO:0006412), Biological Process: tRNA aminoacylation for protein translation (GO:0006418)
YP_002330723.1	Escherichia coli O127:H6 str. E2348/69	1524	ProfileScan	PS51257	PROKAR_LIPOPROTEIN	1	24	7	NULL	NULL
YP_002330723.1	Escherichia coli O127:H6 str. E2348/69	1524	PatternScan	PS00178	AA_TRNA_LIGASE_I	88	99	NA	IPR001412	Aminoacyl-tRNA synthetase, class I, conserved site	Molecular Function: nucleotide binding (GO:0000166), Molecular Function: aminoacyl-tRNA ligase activity (GO:0004812), Molecular Function: ATP binding (GO:0005524), Cellular Component: cytoplasm (GO:0005737), Biological Process: translation (GO:0006412), Biological Process: tRNA aminoacylation for protein translation (GO:0006418)
YP_002392955.1	Escherichia coli S88	1526	PatternScan	PS00178	AA_TRNA_LIGASE_I	94	105	NA	IPR001412	Aminoacyl-tRNA synthetase, class I, conserved site	Molecular Function: nucleotide binding (GO:0000166), Molecular Function: aminoacyl-tRNA ligase activity (GO:0004812), Molecular Function: ATP binding (GO:0005524), Cellular Component: cytoplasm (GO:0005737), Biological Process: translation (GO:0006412), Biological Process: tRNA aminoacylation for protein translation (GO:0006418)
YP_002294524.1	Escherichia coli SE11	1522	HMMPfam	PF01011	PQQ	795	820	0.00025	IPR002372	Pyrrolo-quinoline quinone repeat
YP_002294524.1	Escherichia coli SE11	1522	ProfileScan	PS51257	PROKAR_LIPOPROTEIN	1	24	0	NULL	NULL
YP_002294524.1	Escherichia coli SE11	1522	PatternScan	PS00178	AA_TRNA_LIGASE_I	88	99	0	IPR001412	Aminoacyl-tRNA synthetase, class I, conserved site	Molecular Function: nucleotide binding (GO:0000166), Molecular Function: aminoacyl-tRNA ligase activity (GO:0004812), Molecular Function: ATP binding (GO:0005524), Cellular Component: cytoplasm (GO:0005737), Biological Process: translation (GO:0006412), Biological Process: tRNA aminoacylation for protein translation (GO:0006418)
YP_001745231.1	Escherichia coli SMS-3-5	1518	ProfileScan	PS51257	PROKAR_LIPOPROTEIN	1	24	0	NULL	NULL
YP_001745231.1	Escherichia coli SMS-3-5	1518	PatternScan	PS00178	AA_TRNA_LIGASE_I	88	99	0	IPR001412	Aminoacyl-tRNA synthetase, class I, conserved site	Molecular Function: nucleotide binding (GO:0000166), Molecular Function: aminoacyl-tRNA ligase activity (GO:0004812), Molecular Function: ATP binding (GO:0005524), Cellular Component: cytoplasm (GO:0005737), Biological Process: translation (GO:0006412), Biological Process: tRNA aminoacylation for protein translation (GO:0006418)
AP_003528.1	Escherichia coli str. K-12 substr. W3110	1520	HMMPfam	PF01011	PQQ	793	818	0.43	IPR002372	Pyrrolo-quinoline quinone repeat
AP_003528.1	Escherichia coli str. K-12 substr. W3110	1520	ProfileScan	PS51257	PROKAR_LIPOPROTEIN	1	24	0	NULL	NULL
YP_002414113.1	Escherichia coli UMN026	1520	ProfileScan	PS51257	PROKAR_LIPOPROTEIN	1	24	7	NULL	NULL
YP_002414113.1	Escherichia coli UMN026	1520	PatternScan	PS00178	AA_TRNA_LIGASE_I	88	99	NA	IPR001412	Aminoacyl-tRNA synthetase, class I, conserved site	Molecular Function: nucleotide binding (GO:0000166), Molecular Function: aminoacyl-tRNA ligase activity (GO:0004812), Molecular Function: ATP binding (GO:0005524), Cellular Component: cytoplasm (GO:0005737), Biological Process: translation (GO:0006412), Biological Process: tRNA aminoacylation for protein translation (GO:0006418)
YP_542367.1	Escherichia coli UTI89	1520	PatternScan	PS00178	AA_TRNA_LIGASE_I	88	99	NA	IPR001412	Aminoacyl-tRNA synthetase, class I, conserved site	Molecular Function: nucleotide binding (GO:0000166), Molecular Function: aminoacyl-tRNA ligase activity (GO:0004812), Molecular Function: ATP binding (GO:0005524), Cellular Component: cytoplasm (GO:0005737), Biological Process: translation (GO:0006412), Biological Process: tRNA aminoacylation for protein translation (GO:0006418)
YP_542367.1	Escherichia coli UTI89	1520	ProfileScan	PS51257	PROKAR_LIPOPROTEIN	1	24	7	NULL	NULL
YP_002384010.1	Escherichia fergusonii ATCC 35469	1523	PatternScan	PS00178	AA_TRNA_LIGASE_I	93	104	NA	IPR001412	Aminoacyl-tRNA synthetase, class I, conserved site	Molecular Function: nucleotide binding (GO:0000166), Molecular Function: aminoacyl-tRNA ligase activity (GO:0004812), Molecular Function: ATP binding (GO:0005524), Cellular Component: cytoplasm (GO:0005737), Biological Process: translation (GO:0006412), Biological Process: tRNA aminoacylation for protein translation (GO:0006418)
ZP_04872202.1	Escherichia sp. 1_1_43	1521	HMMPfam	PF01011	PQQ	794	819	0.0002	IPR002372	Pyrrolo-quinoline quinone repeat
ZP_04872202.1	Escherichia sp. 1_1_43	1521	PatternScan	PS00178	AA_TRNA_LIGASE_I	88	99	NA	IPR001412	Aminoacyl-tRNA synthetase, class I, conserved site	Molecular Function: nucleotide binding (GO:0000166), Molecular Function: aminoacyl-tRNA ligase activity (GO:0004812), Molecular Function: ATP binding (GO:0005524), Cellular Component: cytoplasm (GO:0005737), Biological Process: translation (GO:0006412), Biological Process: tRNA aminoacylation for protein translation (GO:0006418)
ZP_04872202.1	Escherichia sp. 1_1_43	1521	ProfileScan	PS51257	PROKAR_LIPOPROTEIN	1	24	7	NULL	NULL
ZP_05438313.1	Escherichia sp. 4_1_40B	1476	PatternScan	PS00178	AA_TRNA_LIGASE_I	44	55	NA	IPR001412	Aminoacyl-tRNA synthetase, class I, conserved site	Molecular Function: nucleotide binding (GO:0000166), Molecular Function: aminoacyl-tRNA ligase activity (GO:0004812), Molecular Function: ATP binding (GO:0005524), Cellular Component: cytoplasm (GO:0005737), Biological Process: translation (GO:0006412), Biological Process: tRNA aminoacylation for protein translation (GO:0006418)
ZP_05438313.1	Escherichia sp. 4_1_40B	1476	HMMPfam	PF01011	PQQ	749	774	0.0002	IPR002372	Pyrrolo-quinoline quinone repeat
ZP_02076735.1	Eubacterium dolichum DSM 3991	1702	HMMPfam	PF00041	fn3	472	550	5.6e-07	IPR003961	Fibronectin, type III
ZP_02076735.1	Eubacterium dolichum DSM 3991	1702	HMMPfam	PF00041	fn3	378	459	0.00016	IPR003961	Fibronectin, type III
ZP_02076735.1	Eubacterium dolichum DSM 3991	1702	superfamily	SSF49785	Gal_bind_like	1419	1549	1.9e-13	IPR008979	Galactose-binding like
ZP_02076735.1	Eubacterium dolichum DSM 3991	1702	PatternScan	PS00018	EF_HAND_1	177	189	0	IPR018247	EF-HAND 1
ZP_02076735.1	Eubacterium dolichum DSM 3991	1702	ProfileScan	PS51257	PROKAR_LIPOPROTEIN	1	18	0	NULL	NULL
ZP_02076735.1	Eubacterium dolichum DSM 3991	1702	HMMSmart	SM00060	FN3	472	547	3e-10	IPR003961	Fibronectin, type III
ZP_02076735.1	Eubacterium dolichum DSM 3991	1702	HMMSmart	SM00060	FN3	378	456	1.7e-05	IPR003961	Fibronectin, type III
ZP_02076735.1	Eubacterium dolichum DSM 3991	1702	ProfileScan	PS50022	FA58C_3	1396	1548	0	IPR000421	Coagulation factor 5/8 type, C-terminal	Biological Process: cell adhesion (GO:0007155)
ZP_02076735.1	Eubacterium dolichum DSM 3991	1702	PatternScan	PS00142	ZINC_PROTEASE	1108	1117	0	NULL	NULL
ZP_02076735.1	Eubacterium dolichum DSM 3991	1702	superfamily	SSF49265	FN_III-like	458	566	8.1e-15	IPR008957	Fibronectin, type III-like fold
ZP_02076735.1	Eubacterium dolichum DSM 3991	1702	superfamily	SSF49265	FN_III-like	378	471	6.7e-11	IPR008957	Fibronectin, type III-like fold
ZP_02076735.1	Eubacterium dolichum DSM 3991	1702	ProfileScan	PS50853	FN3	377	466	0	IPR003961	Fibronectin, type III
ZP_02076735.1	Eubacterium dolichum DSM 3991	1702	ProfileScan	PS50853	FN3	472	557	0	IPR003961	Fibronectin, type III
ZP_02076735.1	Eubacterium dolichum DSM 3991	1702	HMMPfam	PF00754	F5_F8_type_C	1435	1543	2.8e-07	IPR000421	Coagulation factor 5/8 type, C-terminal	Biological Process: cell adhesion (GO:0007155)
YP_434232.1	Hahella chejuensis KCTC 2396	1031	superfamily	SSF49313	Cadherin	67	153	7.9e-15	IPR015919	Cadherin-like	Molecular Function: calcium ion binding (GO:0005509), Cellular Component: membrane (GO:0016020)
YP_434232.1	Hahella chejuensis KCTC 2396	1031	PatternScan	PS00142	ZINC_PROTEASE	808	817	0	NULL	NULL
YP_434232.1	Hahella chejuensis KCTC 2396	1031	ProfileScan	PS51257	PROKAR_LIPOPROTEIN	1	22	0	NULL	NULL
ZP_04443744.1	Listeria grayi DSM 20601	1217	HMMPfam	PF02368	Big_2	741	776	4.8e-05	IPR003343	Bacterial Ig-like, group 2
ZP_04443744.1	Listeria grayi DSM 20601	1217	HMMPfam	PF02368	Big_2	1029	1095	4.4e-06	IPR003343	Bacterial Ig-like, group 2
ZP_04443744.1	Listeria grayi DSM 20601	1217	superfamily	SSF49373	Invasin/intimin cell-adhesion fragments	1018	1112	0.00013	IPR008964	Invasin/intimin cell-adhesion
ZP_04443744.1	Listeria grayi DSM 20601	1217	superfamily	SSF49373	Invasin/intimin cell-adhesion fragments	742	774	0.00042	IPR008964	Invasin/intimin cell-adhesion
ZP_04443744.1	Listeria grayi DSM 20601	1217	ProfileScan	PS51257	PROKAR_LIPOPROTEIN	1	34	5	NULL	NULL
ZP_04443744.1	Listeria grayi DSM 20601	1217	HMMSmart	SM00635	no description	707	787	0.02	IPR003343	Bacterial Ig-like, group 2
ZP_04443744.1	Listeria grayi DSM 20601	1217	HMMSmart	SM00635	no description	1031	1109	0.13	IPR003343	Bacterial Ig-like, group 2
ZP_04563254.1	Mollicutes bacterium D7	1739	HMMPfam	PF00041	fn3	410	491	0.0027	IPR003961	Fibronectin, type III
ZP_04563254.1	Mollicutes bacterium D7	1739	HMMPfam	PF00041	fn3	508	587	3e-10	IPR003961	Fibronectin, type III
ZP_04563254.1	Mollicutes bacterium D7	1739	PatternScan	PS00018	EF_HAND_1	210	222	NA	IPR018247	EF-HAND 1
ZP_04563254.1	Mollicutes bacterium D7	1739	PatternScan	PS00142	ZINC_PROTEASE	1141	1150	NA	NULL	NULL
ZP_04563254.1	Mollicutes bacterium D7	1739	superfamily	SSF49265	Fibronectin type III	494	603	2e-16	IPR008957	Fibronectin, type III-like fold
ZP_04563254.1	Mollicutes bacterium D7	1739	superfamily	SSF49265	Fibronectin type III	409	504	8e-09	IPR008957	Fibronectin, type III-like fold
ZP_04563254.1	Mollicutes bacterium D7	1739	superfamily	SSF49785	Galactose-binding domain-like	1462	1578	1.7e-08	IPR008979	Galactose-binding like
ZP_04563254.1	Mollicutes bacterium D7	1739	superfamily	SSF49785	Galactose-binding domain-like	634	771	6.1e-05	IPR008979	Galactose-binding like
ZP_04563254.1	Mollicutes bacterium D7	1739	ProfileScan	PS50853	FN3	409	498	11.547	IPR003961	Fibronectin, type III
ZP_04563254.1	Mollicutes bacterium D7	1739	ProfileScan	PS50853	FN3	508	594	17.504	IPR003961	Fibronectin, type III
ZP_04563254.1	Mollicutes bacterium D7	1739	HMMSmart	SM00060	no description	410	488	0.00068	IPR003961	Fibronectin, type III
ZP_04563254.1	Mollicutes bacterium D7	1739	HMMSmart	SM00060	no description	508	584	2.5e-08	IPR003961	Fibronectin, type III
XP_001750305.1	Monosiga brevicollis MX1	1025	PatternScan	PS00142	ZINC_PROTEASE	962	971	0	NULL	NULL
XP_001750305.1	Monosiga brevicollis MX1	1025	superfamily	SSF55120	SSF55120	30	274	1.2e-43	NULL	NULL
XP_001750305.1	Monosiga brevicollis MX1	1025	HMMPfam	PF01416	PseudoU_synth_1	37	166	5.5e-17	IPR001406	tRNA pseudouridine synthase	Biological Process: pseudouridine synthesis (GO:0001522), Biological Process: tRNA processing (GO:0008033), Molecular Function: pseudouridine synthase activity (GO:0009982)
XP_001750305.1	Monosiga brevicollis MX1	1025	HMMPfam	PF01416	PseudoU_synth_1	189	231	7.8e-06	IPR001406	tRNA pseudouridine synthase	Biological Process: pseudouridine synthesis (GO:0001522), Biological Process: tRNA processing (GO:0008033), Molecular Function: pseudouridine synthase activity (GO:0009982)
NP_757708.1	Mycoplasma penetrans HF-2	984	PatternScan	PS00142	ZINC_PROTEASE	532	541	0	NULL	NULL
ZP_02327682.1	Paenibacillus larvae subsp. larvae BRL-230010	591	HMMPfam	PF00041	fn3	452	529	4.7e-13	IPR003961	Fibronectin, type III
ZP_02327682.1	Paenibacillus larvae subsp. larvae BRL-230010	591	HMMSmart	SM00060	no description	452	525	6.3e-08	IPR003961	Fibronectin, type III
ZP_02327682.1	Paenibacillus larvae subsp. larvae BRL-230010	591	ProfileScan	PS50853	FN3	453	535	14.749	IPR003961	Fibronectin, type III
ZP_02327682.1	Paenibacillus larvae subsp. larvae BRL-230010	591	superfamily	SSF49265	Fibronectin type III	449	537	1.1e-14	IPR008957	Fibronectin, type III-like fold
ZP_02327682.1	Paenibacillus larvae subsp. larvae BRL-230010	591	HMMPfam	PF02839	CBM_5_12	544	580	0.00017	IPR003610	Carbohydrate-binding family V/XII	Molecular Function: hydrolase activity, hydrolyzing O-glycosyl compounds (GO:0004553), Cellular Component: extracellular region (GO:0005576), Biological Process: carbohydrate metabolic process (GO:0005975), Molecular Function: carbohydrate binding (GO:0030246)
ZP_05730303.1	Pantoea sp. At-9b	557	PatternScan	PS00142	ZINC_PROTEASE	322	331	NA	NULL	NULL
ZP_06155178.1	Photobacterium damselae subsp. damsela	1509	ProfileScan	PS51257	PROKAR_LIPOPROTEIN	1	18	5	NULL	NULL
ZP_04936986.1	Pseudomonas aeruginosa 2192	923	PatternScan	PS00142	ZINC_PROTEASE	693	702	0	NULL	NULL
ZP_04930535.1	Pseudomonas aeruginosa C3719	923	PatternScan	PS00142	ZINC_PROTEASE	693	702	0	NULL	NULL
YP_001346070.1	Pseudomonas aeruginosa PA7	908	PatternScan	PS00142	ZINC_PROTEASE	678	687	0	NULL	NULL
NP_249263.1	Pseudomonas aeruginosa PAO1	923	PatternScan	PS00142	ZINC_PROTEASE	693	702	0	NULL	NULL
YP_788743.1	Pseudomonas aeruginosa UCBPP-PA14	923	PatternScan	PS00142	ZINC_PROTEASE	693	702	0	NULL	NULL
YP_237954.1	Pseudomonas syringae pv. syringae B728a	607	PatternScan	PS00142	ZINC_PROTEASE	446	455	0	NULL	NULL
NP_795062.1	Pseudomonas syringae pv. tomato str. DC3000	630	PatternScan	PS00142	ZINC_PROTEASE	471	480	0	NULL	NULL
YP_926273.1	Shewanella amazonensis SB2B	1074	ProfileScan	PS51257	PROKAR_LIPOPROTEIN	1	25	0	NULL	NULL
YP_001048819.1	Shewanella baltica OS155	1071	ProfileScan	PS51257	PROKAR_LIPOPROTEIN	1	17	0	NULL	NULL
YP_001556458.1	Shewanella baltica OS195	1077	ProfileScan	PS51257	PROKAR_LIPOPROTEIN	1	17	0	NULL	NULL
YP_002359742.1	Shewanella baltica OS223	1077	ProfileScan	PS51257	PROKAR_LIPOPROTEIN	1	17	0	NULL	NULL
YP_001673185.1	Shewanella halifaxensis HAW-EB4	987	PatternScan	PS00142	ZINC_PROTEASE	765	774	0	NULL	NULL
YP_001673185.1	Shewanella halifaxensis HAW-EB4	987	ProfileScan	PS51257	PROKAR_LIPOPROTEIN	1	17	0	NULL	NULL
YP_001675698.1	Shewanella halifaxensis HAW-EB4	1506	ProfileScan	PS51257	PROKAR_LIPOPROTEIN	1	17	0	NULL	NULL
YP_001093051.1	Shewanella loihica PV-4	989	PatternScan	PS00142	ZINC_PROTEASE	767	776	0	NULL	NULL
YP_001093051.1	Shewanella loihica PV-4	989	ProfileScan	PS51257	PROKAR_LIPOPROTEIN	1	17	0	NULL	NULL
NP_716077.1	Shewanella oneidensis MR-1	1073	ProfileScan	PS51257	PROKAR_LIPOPROTEIN	1	17	0	NULL	NULL
YP_001500761.1	Shewanella pealeana ATCC 700345	987	PatternScan	PS00142	ZINC_PROTEASE	765	774	0	NULL	NULL
YP_001500761.1	Shewanella pealeana ATCC 700345	987	ProfileScan	PS51257	PROKAR_LIPOPROTEIN	1	17	0	NULL	NULL
YP_001502491.1	Shewanella pealeana ATCC 700345	1426	PatternScan	PS00142	ZINC_PROTEASE	1220	1229	0	NULL	NULL
YP_001502491.1	Shewanella pealeana ATCC 700345	1426	ProfileScan	PS51257	PROKAR_LIPOPROTEIN	1	17	0	NULL	NULL
YP_868088.1	Shewanella sp. ANA-3	1073	ProfileScan	PS51257	PROKAR_LIPOPROTEIN	1	17	0	NULL	NULL
YP_732580.1	Shewanella sp. MR-4	1073	ProfileScan	PS51257	PROKAR_LIPOPROTEIN	1	17	0	NULL	NULL
YP_739623.1	Shewanella sp. MR-7	1073	ProfileScan	PS51257	PROKAR_LIPOPROTEIN	1	17	0	NULL	NULL
YP_001759442.1	Shewanella woodyi ATCC 51908	991	PatternScan	PS00142	ZINC_PROTEASE	768	777	0	NULL	NULL
YP_001759442.1	Shewanella woodyi ATCC 51908	991	ProfileScan	PS51257	PROKAR_LIPOPROTEIN	1	17	0	NULL	NULL
ZP_05432974.1	Shigella sp. D9	1477	HMMPfam	PF01011	PQQ	751	776	0.0002	IPR002372	Pyrrolo-quinoline quinone repeat
ZP_05432974.1	Shigella sp. D9	1477	PatternScan	PS00178	AA_TRNA_LIGASE_I	44	55	NA	IPR001412	Aminoacyl-tRNA synthetase, class I, conserved site	Molecular Function: nucleotide binding (GO:0000166), Molecular Function: aminoacyl-tRNA ligase activity (GO:0004812), Molecular Function: ATP binding (GO:0005524), Cellular Component: cytoplasm (GO:0005737), Biological Process: translation (GO:0006412), Biological Process: tRNA aminoacylation for protein translation (GO:0006418)
ZP_03966994.1	Sphingobacterium spiritivorum ATCC 33300	620	superfamily	SSF50370	Ricin B-like lectins	476	615	1.2e-17	IPR008997	Ricin B-related lectin
ZP_03966994.1	Sphingobacterium spiritivorum ATCC 33300	620	HMMSmart	SM00458	no description	475	617	1.9e-05	IPR000772	Ricin B lectin
ZP_03966994.1	Sphingobacterium spiritivorum ATCC 33300	620	ProfileScan	PS51257	PROKAR_LIPOPROTEIN	1	23	6	NULL	NULL
ZP_03966994.1	Sphingobacterium spiritivorum ATCC 33300	620	ProfileScan	PS50231	RICIN_B_LECTIN	477	617	11.693	IPR000772	Ricin B lectin
ZP_03966994.1	Sphingobacterium spiritivorum ATCC 33300	620	HMMPfam	PF00652	Ricin_B_lectin	480	566	1.1e-12	IPR000772	Ricin B lectin
ZP_03968927.1	Sphingobacterium spiritivorum ATCC 33300	675	superfamily	SSF49785	Galactose-binding domain-like	496	671	1.2e-19	IPR008979	Galactose-binding like
ZP_03968927.1	Sphingobacterium spiritivorum ATCC 33300	675	PatternScan	PS00142	ZINC_PROTEASE	331	340	NA	NULL	NULL
ZP_03968927.1	Sphingobacterium spiritivorum ATCC 33300	675	ProfileScan	PS51257	PROKAR_LIPOPROTEIN	1	29	5	NULL	NULL
ZP_03968927.1	Sphingobacterium spiritivorum ATCC 33300	675	ProfileScan	PS50022	FA58C_3	517	670	15.93	IPR000421	Coagulation factor 5/8 type, C-terminal	Biological Process: cell adhesion (GO:0007155)
ZP_03968927.1	Sphingobacterium spiritivorum ATCC 33300	675	HMMPfam	PF00754	F5_F8_type_C	535	668	4.5e-13	IPR000421	Coagulation factor 5/8 type, C-terminal	Biological Process: cell adhesion (GO:0007155)
ZP_03969571.1	Sphingobacterium spiritivorum ATCC 33300	622	superfamily	SSF50370	Ricin B-like lectins	478	622	1.1e-26	IPR008997	Ricin B-related lectin
ZP_03969571.1	Sphingobacterium spiritivorum ATCC 33300	622	HMMSmart	SM00458	no description	478	620	3.8e-11	IPR000772	Ricin B lectin
ZP_03969571.1	Sphingobacterium spiritivorum ATCC 33300	622	PatternScan	PS00142	ZINC_PROTEASE	306	315	NA	NULL	NULL
ZP_03969571.1	Sphingobacterium spiritivorum ATCC 33300	622	ProfileScan	PS51257	PROKAR_LIPOPROTEIN	1	25	6	NULL	NULL
ZP_03969571.1	Sphingobacterium spiritivorum ATCC 33300	622	ProfileScan	PS50231	RICIN_B_LECTIN	477	620	12.687	IPR000772	Ricin B lectin
ZP_03969571.1	Sphingobacterium spiritivorum ATCC 33300	622	HMMPfam	PF00652	Ricin_B_lectin	480	617	7.3e-24	IPR000772	Ricin B lectin
ZP_03970216.1	Sphingobacterium spiritivorum ATCC 33300	665	superfamily	SSF49785	Galactose-binding domain-like	493	662	1.2e-15	IPR008979	Galactose-binding like
ZP_03970216.1	Sphingobacterium spiritivorum ATCC 33300	665	PatternScan	PS00142	ZINC_PROTEASE	324	333	NA	NULL	NULL
ZP_03970216.1	Sphingobacterium spiritivorum ATCC 33300	665	ProfileScan	PS51257	PROKAR_LIPOPROTEIN	1	21	6	NULL	NULL
ZP_03970216.1	Sphingobacterium spiritivorum ATCC 33300	665	HMMPfam	PF00754	F5_F8_type_C	519	659	7.8e-06	IPR000421	Coagulation factor 5/8 type, C-terminal	Biological Process: cell adhesion (GO:0007155)
ZP_04778523.1	Sphingobacterium spiritivorum ATCC 33861	675	HMMPfam	PF00754	F5_F8_type_C	535	668	4.7e-13	IPR000421	Coagulation factor 5/8 type, C-terminal	Biological Process: cell adhesion (GO:0007155)
ZP_04778523.1	Sphingobacterium spiritivorum ATCC 33861	675	superfamily	SSF49785	Galactose-binding domain-like	496	671	1.1e-19	IPR008979	Galactose-binding like
ZP_04778523.1	Sphingobacterium spiritivorum ATCC 33861	675	ProfileScan	PS51257	PROKAR_LIPOPROTEIN	1	29	5	NULL	NULL
ZP_04778523.1	Sphingobacterium spiritivorum ATCC 33861	675	ProfileScan	PS50022	FA58C_3	517	670	16.23	IPR000421	Coagulation factor 5/8 type, C-terminal	Biological Process: cell adhesion (GO:0007155)
ZP_04778523.1	Sphingobacterium spiritivorum ATCC 33861	675	PatternScan	PS00142	ZINC_PROTEASE	331	340	NA	NULL	NULL
ZP_04779511.1	Sphingobacterium spiritivorum ATCC 33861	665	HMMPfam	PF00754	F5_F8_type_C	577	659	0.00019	IPR000421	Coagulation factor 5/8 type, C-terminal	Biological Process: cell adhesion (GO:0007155)
ZP_04779511.1	Sphingobacterium spiritivorum ATCC 33861	665	superfamily	SSF49785	Galactose-binding domain-like	493	662	6.6e-14	IPR008979	Galactose-binding like
ZP_04779511.1	Sphingobacterium spiritivorum ATCC 33861	665	ProfileScan	PS51257	PROKAR_LIPOPROTEIN	1	21	6	NULL	NULL
ZP_04780830.1	Sphingobacterium spiritivorum ATCC 33861	620	HMMPfam	PF00652	Ricin_B_lectin	480	566	1.1e-12	IPR000772	Ricin B lectin
ZP_04780830.1	Sphingobacterium spiritivorum ATCC 33861	620	superfamily	SSF50370	Ricin B-like lectins	476	615	1.2e-17	IPR008997	Ricin B-related lectin
ZP_04780830.1	Sphingobacterium spiritivorum ATCC 33861	620	HMMSmart	SM00458	no description	475	617	2.6e-05	IPR000772	Ricin B lectin
ZP_04780830.1	Sphingobacterium spiritivorum ATCC 33861	620	ProfileScan	PS51257	PROKAR_LIPOPROTEIN	1	23	6	NULL	NULL
ZP_04780830.1	Sphingobacterium spiritivorum ATCC 33861	620	ProfileScan	PS50231	RICIN_B_LECTIN	477	617	11.769	IPR000772	Ricin B lectin
ZP_04781290.1	Sphingobacterium spiritivorum ATCC 33861	622	HMMPfam	PF00652	Ricin_B_lectin	480	617	2.4e-22	IPR000772	Ricin B lectin
ZP_04781290.1	Sphingobacterium spiritivorum ATCC 33861	622	superfamily	SSF50370	Ricin B-like lectins	478	622	1.5e-26	IPR008997	Ricin B-related lectin
ZP_04781290.1	Sphingobacterium spiritivorum ATCC 33861	622	HMMSmart	SM00458	no description	478	620	9.5e-11	IPR000772	Ricin B lectin
ZP_04781290.1	Sphingobacterium spiritivorum ATCC 33861	622	PatternScan	PS00142	ZINC_PROTEASE	306	315	NA	NULL	NULL
ZP_04781290.1	Sphingobacterium spiritivorum ATCC 33861	622	ProfileScan	PS51257	PROKAR_LIPOPROTEIN	1	25	6	NULL	NULL
ZP_04781290.1	Sphingobacterium spiritivorum ATCC 33861	622	ProfileScan	PS50231	RICIN_B_LECTIN	477	620	12.356	IPR000772	Ricin B lectin
ZP_05981011.2	Subdoligranulum variabile DSM 15176	1764	HMMPfam	PF00041	fn3	460	540	0.0026	IPR003961	Fibronectin, type III
ZP_05981011.2	Subdoligranulum variabile DSM 15176	1764	HMMPfam	PF00041	fn3	579	631	4.3e-09	IPR003961	Fibronectin, type III
ZP_05981011.2	Subdoligranulum variabile DSM 15176	1764	ProfileScan	PS50853	FN3	459	547	12.975	IPR003961	Fibronectin, type III
ZP_05981011.2	Subdoligranulum variabile DSM 15176	1764	ProfileScan	PS50853	FN3	553	638	15.867	IPR003961	Fibronectin, type III
ZP_05981011.2	Subdoligranulum variabile DSM 15176	1764	HMMSmart	SM00060	no description	460	537	0.037	IPR003961	Fibronectin, type III
ZP_05981011.2	Subdoligranulum variabile DSM 15176	1764	HMMSmart	SM00060	no description	553	628	1.4e-06	IPR003961	Fibronectin, type III
ZP_05981011.2	Subdoligranulum variabile DSM 15176	1764	superfamily	SSF49265	Fibronectin type III	546	643	3.2e-13	IPR008957	Fibronectin, type III-like fold
ZP_05981011.2	Subdoligranulum variabile DSM 15176	1764	superfamily	SSF49785	Galactose-binding domain-like	1453	1615	3.4e-10	IPR008979	Galactose-binding like
ZP_05981011.2	Subdoligranulum variabile DSM 15176	1764	superfamily	SSF49265	Fibronectin type III	453	545	5.2e-09	IPR008957	Fibronectin, type III-like fold
ZP_05981011.2	Subdoligranulum variabile DSM 15176	1764	superfamily	SSF49785	Galactose-binding domain-like	665	809	3.3e-05	IPR008979	Galactose-binding like
XP_001299523.1	Trichomonas vaginalis G3	939	superfamily	SSF49785	Gal_bind_like	544	669	6.7e-06	IPR008979	Galactose-binding like
XP_001313082.1	Trichomonas vaginalis G3	504	PatternScan	PS00142	ZINC_PROTEASE	275	284	0	NULL	NULL
XP_001319601.1	Trichomonas vaginalis G3	829	superfamily	SSF49785	Gal_bind_like	488	608	4.1e-06	IPR008979	Galactose-binding like
XP_001319601.1	Trichomonas vaginalis G3	829	PatternScan	PS00142	ZINC_PROTEASE	35	44	0	NULL	NULL
XP_001330197.1	Trichomonas vaginalis G3	1148	PatternScan	PS00142	ZINC_PROTEASE	358	367	0	NULL	NULL
XP_001580677.1	Trichomonas vaginalis G3	988	superfamily	SSF49785	Gal_bind_like	756	870	2.1e-07	IPR008979	Galactose-binding like
XP_001580677.1	Trichomonas vaginalis G3	988	ProfileScan	PS50022	FA58C_3	747	872	0	IPR000421	Coagulation factor 5/8 type, C-terminal	Biological Process: cell adhesion (GO:0007155)
XP_001580677.1	Trichomonas vaginalis G3	988	PatternScan	PS00142	ZINC_PROTEASE	412	421	0	NULL	NULL
XP_001582477.1	Trichomonas vaginalis G3	1162	PatternScan	PS00142	ZINC_PROTEASE	352	361	0	NULL	NULL
XP_001583210.1	Trichomonas vaginalis G3	1128	superfamily	SSF49785	Gal_bind_like	596	761	2.8e-09	IPR008979	Galactose-binding like
XP_001583210.1	Trichomonas vaginalis G3	1128	ProfileScan	PS50022	FA58C_3	609	741	0	IPR000421	Coagulation factor 5/8 type, C-terminal	Biological Process: cell adhesion (GO:0007155)
XP_001583210.1	Trichomonas vaginalis G3	1128	HMMPfam	PF00754	F5_F8_type_C	678	755	0.015	IPR000421	Coagulation factor 5/8 type, C-terminal	Biological Process: cell adhesion (GO:0007155)
XP_001583909.1	Trichomonas vaginalis G3	595	PatternScan	PS00142	ZINC_PROTEASE	352	361	0	NULL	NULL
ZP_01260413.1	Vibrio alginolyticus 12G01	907	PatternScan	PS00142	ZINC_PROTEASE	682	691	0	NULL	NULL
ZP_01260413.1	Vibrio alginolyticus 12G01	907	ProfileScan	PS51257	PROKAR_LIPOPROTEIN	1	17	0	NULL	NULL
ZP_06181693.1	Vibrio alginolyticus 40B	907	ProfileScan	PS51257	PROKAR_LIPOPROTEIN	1	17	6	NULL	NULL
ZP_06181693.1	Vibrio alginolyticus 40B	907	PatternScan	PS00142	ZINC_PROTEASE	682	691	NA	NULL	NULL
ZP_01949281.1	Vibrio cholerae 1587	1496	ProfileScan	PS51257	PROKAR_LIPOPROTEIN	1	17	6	NULL	NULL
ZP_04960229.1	Vibrio cholerae AM-19226	1507	ProfileScan	PS51257	PROKAR_LIPOPROTEIN	1	17	0	NULL	NULL
ZP_04413087.1	Vibrio cholerae bv. albensis VL426	1525	ProfileScan	PS51257	PROKAR_LIPOPROTEIN	1	20	6	NULL	NULL
ZP_01954520.1	Vibrio cholerae MAK 757	978	PatternScan	PS00142	ZINC_PROTEASE	765	774	0	NULL	NULL
ZP_01955015.1	Vibrio cholerae MZO-3	1462	PatternScan	PS00142	ZINC_PROTEASE	1262	1271	0	NULL	NULL
ZP_01955015.1	Vibrio cholerae MZO-3	1462	ProfileScan	PS51257	PROKAR_LIPOPROTEIN	1	16	0	NULL	NULL
NP_230493.1	Vibrio cholerae O1 biovar El Tor str. N16961	1520	ProfileScan	PS51257	PROKAR_LIPOPROTEIN	1	17	6	NULL	NULL
YP_001216326.1	Vibrio cholerae O395	1443	PatternScan	PS00142	ZINC_PROTEASE	1230	1239	NA	NULL	NULL
ZP_04916523.1	Vibrio cholerae RC385	1526	ProfileScan	PS51257	PROKAR_LIPOPROTEIN	1	20	0	NULL	NULL
ZP_04404639.1	Vibrio cholerae TMA 21	1507	ProfileScan	PS51257	PROKAR_LIPOPROTEIN	1	17	6	NULL	NULL
ZP_04918555.1	Vibrio cholerae V51	1507	ProfileScan	PS51257	PROKAR_LIPOPROTEIN	1	17	0	NULL	NULL
ZP_04918705.1	Vibrio cholerae V51	1524	PatternScan	PS00142	ZINC_PROTEASE	1311	1320	0	NULL	NULL
ZP_04918705.1	Vibrio cholerae V51	1524	ProfileScan	PS51257	PROKAR_LIPOPROTEIN	1	17	0	NULL	NULL
YP_204079.1	Vibrio fis	1569	ProfileScan	PS51257	PROKAR_LIPOPROTEIN	1	18	0	NULL	NULL
YP_002155459.1	Vibrio fischeri MJ11	1482	PatternScan	PS00142	ZINC_PROTEASE	1269	1278	0	NULL	NULL
YP_002155459.1	Vibrio fischeri MJ11	1482	ProfileScan	PS51257	PROKAR_LIPOPROTEIN	1	18	0	NULL	NULL
ZP_06177065.1	Vibrio harveyi 1DA3	1466	ProfileScan	PS51257	PROKAR_LIPOPROTEIN	1	17	6	NULL	NULL
ZP_06177065.1	Vibrio harveyi 1DA3	1466	PatternScan	PS00142	ZINC_PROTEASE	1256	1265	NA	NULL	NULL
ZP_01985049.1	Vibrio harveyi HY01	1466	PatternScan	PS00142	ZINC_PROTEASE	1256	1265	0	NULL	NULL
ZP_01985049.1	Vibrio harveyi HY01	1466	ProfileScan	PS51257	PROKAR_LIPOPROTEIN	1	17	0	NULL	NULL
ZP_06039074.1	Vibrio mimicus MB-451	1526	ProfileScan	PS51257	PROKAR_LIPOPROTEIN	1	17	6	NULL	NULL
ZP_06033510.1	Vibrio mimicus VM223	1526	ProfileScan	PS51257	PROKAR_LIPOPROTEIN	1	17	6	NULL	NULL
ZP_05718328.1	Vibrio mimicus VM573	1529	ProfileScan	PS51257	PROKAR_LIPOPROTEIN	1	20	7	NULL	NULL
ZP_05945865.1	Vibrio orientalis CIP 102891	929	ProfileScan	PS51257	PROKAR_LIPOPROTEIN	1	21	6	NULL	NULL
ZP_05945865.1	Vibrio orientalis CIP 102891	929	PatternScan	PS00142	ZINC_PROTEASE	706	715	NA	NULL	NULL
ZP_01990000.1	Vibrio parahaemolyticus AQ3810	906	PatternScan	PS00142	ZINC_PROTEASE	682	691	0	NULL	NULL
ZP_01990000.1	Vibrio parahaemolyticus AQ3810	906	ProfileScan	PS51257	PROKAR_LIPOPROTEIN	1	17	0	NULL	NULL
ZP_05908271.1	Vibrio parahaemolyticus AQ4037	1431	PatternScan	PS00142	ZINC_PROTEASE	1221	1230	NA	NULL	NULL
ZP_05911847.1	Vibrio parahaemolyticus AQ4037	906	ProfileScan	PS51257	PROKAR_LIPOPROTEIN	1	17	6	NULL	NULL
ZP_05911847.1	Vibrio parahaemolyticus AQ4037	906	PatternScan	PS00142	ZINC_PROTEASE	682	691	NA	NULL	NULL
NP_797381.1	Vibrio parahaemolyticus RIMD 2210633	906	PatternScan	PS00142	ZINC_PROTEASE	682	691	0	NULL	NULL
NP_797381.1	Vibrio parahaemolyticus RIMD 2210633	906	ProfileScan	PS51257	PROKAR_LIPOPROTEIN	1	17	0	NULL	NULL
NP_800886.1	Vibrio parahaemolyticus RIMD 2210633	1497	ProfileScan	PS51257	PROKAR_LIPOPROTEIN	1	17	0	NULL	NULL
YP_003286593.1	Vibrio sp. Ex25	906	ProfileScan	PS51257	PROKAR_LIPOPROTEIN	1	17	6	NULL	NULL
ZP_04922420.1	Vibrio sp. Ex25	587	PatternScan	PS00142	ZINC_PROTEASE	363	372	0	NULL	NULL
ZP_01064757.1	Vibrio sp. MED222	911	PatternScan	PS00142	ZINC_PROTEASE	687	696	0	NULL	NULL
ZP_01064757.1	Vibrio sp. MED222	911	ProfileScan	PS51257	PROKAR_LIPOPROTEIN	1	21	0	NULL	NULL
ZP_06078833.1	Vibrio sp. RC586	1524	ProfileScan	PS51257	PROKAR_LIPOPROTEIN	1	17	6	NULL	NULL
YP_002416673.1	Vibrio splendidus LGP32	911	ProfileScan	PS51257	PROKAR_LIPOPROTEIN	1	21	6	NULL	NULL
NP_760966.1	Vibrio vulnificus CMCP6	906	PatternScan	PS00142	ZINC_PROTEASE	682	691	0	NULL	NULL
NP_760966.1	Vibrio vulnificus CMCP6	906	ProfileScan	PS51257	PROKAR_LIPOPROTEIN	1	17	0	NULL	NULL
NP_935128.1	Vibrio vulnificus YJ016	929	PatternScan	PS00142	ZINC_PROTEASE	705	714	0	NULL	NULL
ZP_01814153.1	Vibrionales bacterium SWAT-3	961	PatternScan	PS00142	ZINC_PROTEASE	737	746	0	NULL	NULL
ZP_01814153.1	Vibrionales bacterium SWAT-3	961	ProfileScan	PS51257	PROKAR_LIPOPROTEIN	1	22	0	NULL	NULL
ZP_04618439.1	Yersinia aldovae ATCC 35236	801	HMMSmart	SM00495	no description	663	718	0.51	IPR003610	Carbohydrate-binding family V/XII	Molecular Function: hydrolase activity, hydrolyzing O-glycosyl compounds (GO:0004553), Cellular Component: extracellular region (GO:0005576), Biological Process: carbohydrate metabolic process (GO:0005975), Molecular Function: carbohydrate binding (GO:0030246)
ZP_04618439.1	Yersinia aldovae ATCC 35236	801	HMMSmart	SM00495	no description	743	794	0.8	IPR003610	Carbohydrate-binding family V/XII	Molecular Function: hydrolase activity, hydrolyzing O-glycosyl compounds (GO:0004553), Cellular Component: extracellular region (GO:0005576), Biological Process: carbohydrate metabolic process (GO:0005975), Molecular Function: carbohydrate binding (GO:0030246)
ZP_04618439.1	Yersinia aldovae ATCC 35236	801	superfamily	SSF51055	Carbohydrate binding domain	647	722	0.00013	IPR003610	Carbohydrate-binding family V/XII	Molecular Function: hydrolase activity, hydrolyzing O-glycosyl compounds (GO:0004553), Cellular Component: extracellular region (GO:0005576), Biological Process: carbohydrate metabolic process (GO:0005975), Molecular Function: carbohydrate binding (GO:0030246)
ZP_04618439.1	Yersinia aldovae ATCC 35236	801	superfamily	SSF51055	Carbohydrate binding domain	737	801	0.00037	IPR003610	Carbohydrate-binding family V/XII	Molecular Function: hydrolase activity, hydrolyzing O-glycosyl compounds (GO:0004553), Cellular Component: extracellular region (GO:0005576), Biological Process: carbohydrate metabolic process (GO:0005975), Molecular Function: carbohydrate binding (GO:0030246)
YP_001007019.1	Yersinia enterocolitica subsp. enterocolitica 8081	808	superfamily	SSF51055	CBM_5_12	652	727	6.4e-06	IPR003610	Carbohydrate-binding family V/XII	Molecular Function: hydrolase activity, hydrolyzing O-glycosyl compounds (GO:0004553), Cellular Component: extracellular region (GO:0005576), Biological Process: carbohydrate metabolic process (GO:0005975), Molecular Function: carbohydrate binding (GO:0030246)
YP_001007019.1	Yersinia enterocolitica subsp. enterocolitica 8081	808	HMMPfam	PF02839	CBM_5_12	668	716	3.7	IPR003610	Carbohydrate-binding family V/XII	Molecular Function: hydrolase activity, hydrolyzing O-glycosyl compounds (GO:0004553), Cellular Component: extracellular region (GO:0005576), Biological Process: carbohydrate metabolic process (GO:0005975), Molecular Function: carbohydrate binding (GO:0030246)
ZP_04639817.1	Yersinia mollaretii ATCC 43969	801	PatternScan	PS00172	XYLOSE_ISOMERASE_1	731	738	NA	IPR018115	Xylose isomerase, active site
ZP_04639817.1	Yersinia mollaretii ATCC 43969	801	HMMSmart	SM00495	no description	661	716	3.1	IPR003610	Carbohydrate-binding family V/XII	Molecular Function: hydrolase activity, hydrolyzing O-glycosyl compounds (GO:0004553), Cellular Component: extracellular region (GO:0005576), Biological Process: carbohydrate metabolic process (GO:0005975), Molecular Function: carbohydrate binding (GO:0030246)
ZP_04639817.1	Yersinia mollaretii ATCC 43969	801	HMMSmart	SM00495	no description	743	794	1.4	IPR003610	Carbohydrate-binding family V/XII	Molecular Function: hydrolase activity, hydrolyzing O-glycosyl compounds (GO:0004553), Cellular Component: extracellular region (GO:0005576), Biological Process: carbohydrate metabolic process (GO:0005975), Molecular Function: carbohydrate binding (GO:0030246)
ZP_04639817.1	Yersinia mollaretii ATCC 43969	801	superfamily	SSF51055	Carbohydrate binding domain	645	720	5e-05	IPR003610	Carbohydrate-binding family V/XII	Molecular Function: hydrolase activity, hydrolyzing O-glycosyl compounds (GO:0004553), Cellular Component: extracellular region (GO:0005576), Biological Process: carbohydrate metabolic process (GO:0005975), Molecular Function: carbohydrate binding (GO:0030246)
ZP_04639817.1	Yersinia mollaretii ATCC 43969	801	superfamily	SSF51055	Carbohydrate binding domain	737	801	0.0022	IPR003610	Carbohydrate-binding family V/XII	Molecular Function: hydrolase activity, hydrolyzing O-glycosyl compounds (GO:0004553), Cellular Component: extracellular region (GO:0005576), Biological Process: carbohydrate metabolic process (GO:0005975), Molecular Function: carbohydrate binding (GO:0030246)
ZP_04617115.1	Yersinia ruckeri ATCC 29473	808	HMMPfam	PF02839	CBM_5_12	662	688	0.0035	IPR003610	Carbohydrate-binding family V/XII	Molecular Function: hydrolase activity, hydrolyzing O-glycosyl compounds (GO:0004553), Cellular Component: extracellular region (GO:0005576), Biological Process: carbohydrate metabolic process (GO:0005975), Molecular Function: carbohydrate binding (GO:0030246)
ZP_04617115.1	Yersinia ruckeri ATCC 29473	808	HMMSmart	SM00495	no description	662	713	0.82	IPR003610	Carbohydrate-binding family V/XII	Molecular Function: hydrolase activity, hydrolyzing O-glycosyl compounds (GO:0004553), Cellular Component: extracellular region (GO:0005576), Biological Process: carbohydrate metabolic process (GO:0005975), Molecular Function: carbohydrate binding (GO:0030246)
ZP_04617115.1	Yersinia ruckeri ATCC 29473	808	HMMSmart	SM00495	no description	750	801	2.2	IPR003610	Carbohydrate-binding family V/XII	Molecular Function: hydrolase activity, hydrolyzing O-glycosyl compounds (GO:0004553), Cellular Component: extracellular region (GO:0005576), Biological Process: carbohydrate metabolic process (GO:0005975), Molecular Function: carbohydrate binding (GO:0030246)
ZP_04617115.1	Yersinia ruckeri ATCC 29473	808	superfamily	SSF51055	Carbohydrate binding domain	646	721	6.4e-06	IPR003610	Carbohydrate-binding family V/XII	Molecular Function: hydrolase activity, hydrolyzing O-glycosyl compounds (GO:0004553), Cellular Component: extracellular region (GO:0005576), Biological Process: carbohydrate metabolic process (GO:0005975), Molecular Function: carbohydrate binding (GO:0030246)
ZP_04617115.1	Yersinia ruckeri ATCC 29473	808	superfamily	SSF51055	Carbohydrate binding domain	744	808	0.0012	IPR003610	Carbohydrate-binding family V/XII	Molecular Function: hydrolase activity, hydrolyzing O-glycosyl compounds (GO:0004553), Cellular Component: extracellular region (GO:0005576), Biological Process: carbohydrate metabolic process (GO:0005975), Molecular Function: carbohydrate binding (GO:0030246)

## Sheet: Pfam domains counts only
			P	Count
			PF00754	88
Count of Enrty			PF08305	46
Row Labels	Total		PF00041	38
PF00041	38		PF02839	20
PF00395	3		PF03272	19
PF00404	1		PF07554	19
PF00652	4		PF01011	13
PF00746	2		PF07523	11
PF00754	88		PF00652	4
PF01011	13		PF00395	3
PF01416	2		PF00746	2
PF02368	2		PF01416	2
PF02839	20		PF02368	2
PF03272	19		PF00404	1
PF03989	1		PF03989	1
PF05738	1		PF05738	1
PF07523	11
PF07554	19
PF08305	46
Grand Total	270

## Sheet: Sequence counts
			Accession	counts
			ZP_05129649.1	22
Count of Accesion			YP_695519.1	17
Accesion	Total		ZP_02641714.1	17
AP_003528.1	2		ZP_02631053.1	16
NP_230493.1	1		ZP_02637411.1	16
NP_249263.1	1		ZP_02637953.1	16
NP_562197.1	13		ZP_02865871.1	16
NP_716077.1	1		ZP_02953684.1	16
NP_757708.1	1		ZP_06117837.1	16
NP_760966.1	2		YP_001920091.1	15
NP_795062.1	1		YP_003182171.1	15
NP_797381.1	2		ZP_04823618.1	15
NP_800886.1	1		ZP_02076735.1	14
NP_809190.1	4		ZP_03292590.1	14
NP_811927.1	4		NP_562197.1	13
NP_813155.1	3		YP_695932.1	13
NP_813183.1	3		ZP_02035877.1	13
NP_935128.1	1		ZP_02211509.1	13
XP_001299523.1	1		ZP_02635227.1	13
XP_001313082.1	1		ZP_02638647.1	13
XP_001319601.1	2		ZP_02642699.1	13
XP_001330197.1	1		ZP_02951972.1	12
XP_001580677.1	3		ZP_04563254.1	12
XP_001582477.1	1		ZP_02426874.1	11
XP_001583210.1	3		ZP_05981011.2	10
XP_001583909.1	1		YP_698600.1	9
XP_001737701.1	1		ZP_00738692.1	9
XP_001750305.1	4		ZP_00739797.1	8
XP_002613810.1	2		ZP_04112386.1	8
XP_654508.1	1		ZP_04140386.1	8
YP_001007019.1	2		ZP_04171806.1	8
YP_001048819.1	1		ZP_04200907.1	8
YP_001093051.1	2		YP_001642566.1	7
YP_001216326.1	1		ZP_02211508.1	7
YP_001298266.1	2		ZP_03233872.1	7
YP_001346070.1	1		ZP_04111485.1	7
YP_001376651.1	6		ZP_04117796.1	7
YP_001459760.1	1		ZP_04206946.1	7
YP_001464429.1	1		ZP_04215346.1	7
YP_001500761.1	2		ZP_04233797.1	7
YP_001502491.1	2		ZP_04262242.1	7
YP_001556458.1	1		ZP_04298280.1	7
YP_001605310.1	1		ZP_04309267.1	7
YP_001642566.1	7		ZP_04319929.1	7
YP_001673185.1	2		ZP_04443744.1	7
YP_001675698.1	1		YP_001376651.1	6
YP_001722552.1	1		ZP_02953260.1	6
YP_001745231.1	2		ZP_03234378.1	6
YP_001759442.1	2		ZP_03969571.1	6
YP_001877245.1	1		ZP_04105302.1	6
YP_001877521.1	1		ZP_04136244.1	6
YP_001920091.1	15		ZP_04248750.1	6
YP_002113233.1	1		ZP_04320752.1	6
YP_002155459.1	2		ZP_04781290.1	6
YP_002294524.1	3		ZP_01960247.1	5
YP_002330723.1	2		ZP_02327682.1	5
YP_002359742.1	1		ZP_03966994.1	5
YP_002366602.1	3		ZP_03968927.1	5
YP_002384010.1	1		ZP_04617115.1	5
YP_002388453.1	2		ZP_04639817.1	5
YP_002392955.1	1		ZP_04778523.1	5
YP_002399471.1	1		ZP_04780830.1	5
YP_002404344.1	1		NP_809190.1	4
YP_002409370.1	2		NP_811927.1	4
YP_002414113.1	2		XP_001750305.1	4
YP_002416673.1	1		ZP_01960238.1	4
YP_003046028.1	2		ZP_02954286.1	4
YP_003154412.1	1		ZP_03970216.1	4
YP_003182171.1	15		ZP_04618439.1	4
YP_003236130.1	3		NP_813155.1	3
YP_003286593.1	1		NP_813183.1	3
YP_037494.1	2		XP_001580677.1	3
YP_204079.1	1		XP_001583210.1	3
YP_212553.1	3		YP_002294524.1	3
YP_237954.1	1		YP_002366602.1	3
YP_434232.1	3		YP_003236130.1	3
YP_542367.1	2		YP_212553.1	3
YP_670934.1	3		YP_434232.1	3
YP_695519.1	17		YP_670934.1	3
YP_695932.1	13		ZP_01802287.1	3
YP_698600.1	9		ZP_01959638.1	3
YP_732580.1	1		ZP_01960170.1	3
YP_739623.1	1		ZP_01960228.1	3
YP_788743.1	1		ZP_03030866.1	3
YP_868088.1	1		ZP_03068889.1	3
YP_926273.1	1		ZP_03207951.1	3
ZP_00738692.1	9		ZP_04005476.1	3
ZP_00739797.1	8		ZP_04071470.1	3
ZP_01064757.1	2		ZP_04101632.1	3
ZP_01260413.1	2		ZP_04154891.1	3
ZP_01802287.1	3		ZP_04237054.1	3
ZP_01814153.1	2		ZP_04238966.1	3
ZP_01949281.1	1		ZP_04247877.1	3
ZP_01954520.1	1		ZP_04248460.1	3
ZP_01955015.1	2		ZP_04278345.1	3
ZP_01958589.1	2		ZP_04300725.1	3
ZP_01959638.1	3		ZP_04779511.1	3
ZP_01959759.1	2		ZP_04842342.1	3
ZP_01959767.1	1		ZP_04846622.1	3
ZP_01959768.1	1		ZP_04847358.1	3
ZP_01959885.1	2		ZP_04872202.1	3
ZP_01959886.1	1		ZP_05415629.1	3
ZP_01960170.1	3		AP_003528.1	2
ZP_01960228.1	3		NP_760966.1	2
ZP_01960229.1	2		NP_797381.1	2
ZP_01960238.1	4		XP_001319601.1	2
ZP_01960247.1	5		XP_002613810.1	2
ZP_01960954.1	2		YP_001007019.1	2
ZP_01961267.1	2		YP_001093051.1	2
ZP_01961832.1	1		YP_001298266.1	2
ZP_01961967.1	2		YP_001500761.1	2
ZP_01985049.1	2		YP_001502491.1	2
ZP_01990000.1	2		YP_001673185.1	2
ZP_02035877.1	13		YP_001745231.1	2
ZP_02076735.1	14		YP_001759442.1	2
ZP_02211508.1	7		YP_002155459.1	2
ZP_02211509.1	13		YP_002330723.1	2
ZP_02311074.1	1		YP_002388453.1	2
ZP_02327682.1	5		YP_002409370.1	2
ZP_02426874.1	11		YP_002414113.1	2
ZP_02631053.1	16		YP_003046028.1	2
ZP_02635227.1	13		YP_037494.1	2
ZP_02637411.1	16		YP_542367.1	2
ZP_02637953.1	16		ZP_01064757.1	2
ZP_02638647.1	13		ZP_01260413.1	2
ZP_02641714.1	17		ZP_01814153.1	2
ZP_02642699.1	13		ZP_01955015.1	2
ZP_02865871.1	16		ZP_01958589.1	2
ZP_02900937.1	2		ZP_01959759.1	2
ZP_02951972.1	12		ZP_01959885.1	2
ZP_02953260.1	6		ZP_01960229.1	2
ZP_02953684.1	16		ZP_01960954.1	2
ZP_02954286.1	4		ZP_01961267.1	2
ZP_02998968.1	2		ZP_01961967.1	2
ZP_03030866.1	3		ZP_01985049.1	2
ZP_03033388.1	2		ZP_01990000.1	2
ZP_03043208.1	2		ZP_02900937.1	2
ZP_03048261.1	1		ZP_02998968.1	2
ZP_03068889.1	3		ZP_03033388.1	2
ZP_03207951.1	3		ZP_03043208.1	2
ZP_03233872.1	7		ZP_04140245.1	2
ZP_03234378.1	6		ZP_04168944.1	2
ZP_03292590.1	14		ZP_04231342.1	2
ZP_03966994.1	5		ZP_04236724.1	2
ZP_03968927.1	5		ZP_04918705.1	2
ZP_03969571.1	6		ZP_05149820.1	2
ZP_03970216.1	4		ZP_05282640.1	2
ZP_04005476.1	3		ZP_05432974.1	2
ZP_04071470.1	3		ZP_05438313.1	2
ZP_04087070.1	1		ZP_05757374.1	2
ZP_04101632.1	3		ZP_05911847.1	2
ZP_04105302.1	6		ZP_05945865.1	2
ZP_04111485.1	7		ZP_06177065.1	2
ZP_04112386.1	8		ZP_06181693.1	2
ZP_04117796.1	7		NP_230493.1	1
ZP_04136244.1	6		NP_249263.1	1
ZP_04140245.1	2		NP_716077.1	1
ZP_04140386.1	8		NP_757708.1	1
ZP_04154891.1	3		NP_795062.1	1
ZP_04168944.1	2		NP_800886.1	1
ZP_04171806.1	8		NP_935128.1	1
ZP_04200907.1	8		XP_001299523.1	1
ZP_04206946.1	7		XP_001313082.1	1
ZP_04215346.1	7		XP_001330197.1	1
ZP_04228026.1	1		XP_001582477.1	1
ZP_04231342.1	2		XP_001583909.1	1
ZP_04233797.1	7		XP_001737701.1	1
ZP_04236724.1	2		XP_654508.1	1
ZP_04237054.1	3		YP_001048819.1	1
ZP_04238966.1	3		YP_001216326.1	1
ZP_04245415.1	1		YP_001346070.1	1
ZP_04246240.1	1		YP_001459760.1	1
ZP_04247877.1	3		YP_001464429.1	1
ZP_04248460.1	3		YP_001556458.1	1
ZP_04248750.1	6		YP_001605310.1	1
ZP_04262242.1	7		YP_001675698.1	1
ZP_04278345.1	3		YP_001722552.1	1
ZP_04286723.1	1		YP_001877245.1	1
ZP_04298280.1	7		YP_001877521.1	1
ZP_04298287.1	1		YP_002113233.1	1
ZP_04300725.1	3		YP_002359742.1	1
ZP_04309267.1	7		YP_002384010.1	1
ZP_04319929.1	7		YP_002392955.1	1
ZP_04320752.1	6		YP_002399471.1	1
ZP_04404639.1	1		YP_002404344.1	1
ZP_04413087.1	1		YP_002416673.1	1
ZP_04443744.1	7		YP_003154412.1	1
ZP_04563254.1	12		YP_003286593.1	1
ZP_04617115.1	5		YP_204079.1	1
ZP_04618439.1	4		YP_237954.1	1
ZP_04639817.1	5		YP_732580.1	1
ZP_04778523.1	5		YP_739623.1	1
ZP_04779511.1	3		YP_788743.1	1
ZP_04780830.1	5		YP_868088.1	1
ZP_04781290.1	6		YP_926273.1	1
ZP_04823618.1	15		ZP_01949281.1	1
ZP_04842342.1	3		ZP_01954520.1	1
ZP_04846622.1	3		ZP_01959767.1	1
ZP_04847358.1	3		ZP_01959768.1	1
ZP_04872202.1	3		ZP_01959886.1	1
ZP_04916523.1	1		ZP_01961832.1	1
ZP_04918555.1	1		ZP_02311074.1	1
ZP_04918705.1	2		ZP_03048261.1	1
ZP_04922420.1	1		ZP_04087070.1	1
ZP_04930535.1	1		ZP_04228026.1	1
ZP_04936986.1	1		ZP_04245415.1	1
ZP_04960229.1	1		ZP_04246240.1	1
ZP_05129649.1	22		ZP_04286723.1	1
ZP_05149820.1	2		ZP_04298287.1	1
ZP_05282640.1	2		ZP_04404639.1	1
ZP_05415629.1	3		ZP_04413087.1	1
ZP_05432974.1	2		ZP_04916523.1	1
ZP_05438313.1	2		ZP_04918555.1	1
ZP_05718328.1	1		ZP_04922420.1	1
ZP_05730303.1	1		ZP_04930535.1	1
ZP_05757374.1	2		ZP_04936986.1	1
ZP_05908271.1	1		ZP_04960229.1	1
ZP_05911847.1	2		ZP_05718328.1	1
ZP_05945865.1	2		ZP_05730303.1	1
ZP_05981011.2	10		ZP_05908271.1	1
ZP_06033510.1	1		ZP_06033510.1	1
ZP_06039074.1	1		ZP_06039074.1	1
ZP_06078833.1	1		ZP_06078833.1	1
ZP_06117837.1	16		ZP_06155178.1	1
ZP_06155178.1	1
ZP_06177065.1	2
ZP_06181693.1	2			905
(blank)
Grand Total	905
