# Supplementary material for: A Novel Extracellular Metallopeptidase Domain Shared by Animal Host-Associated Mutualistic and Pathogenic Microbes
Source: PLoS One. 2012 Jan 27;7(1):e30287. doi: 10.1371/journal.pone.0030287 (PMC3267712; doi:10.1371/journal.pone.0030287)
Supplement: Table S8 — Table listing M60-like/PF13402-CBM32 entries. Separate worksheets list sequence counts or taxa counts along with habitat information for each species/strains. Format: Excel file with two worksheets. (XLSX) [file pone.0030287.s015.xlsx]

## Sheet: Full list
hit_seq	Taxa	Description	Protein length	Domain name	Pfam acession	qlen	f_eval	f_scroe	f_bias	no.	total hits	c_eval	i_eval	i_score	i_bias	hmm from	hmm to	ali from	ali to	env from	env to	acc
gi|254517593|ref|ZP_05129649.1|N	Clostridium sp. 7_2_43FAA	leucine rich repeat domain-containing protein	2664	F5_F8_type_C	PF00754.18	129	3.2e-65	213	50.7	1	8	2e-16	1.3e-15	52.6	1.5	2	129	76	206	75	206	0.91
gi|254517593|ref|ZP_05129649.1|N	Clostridium sp. 7_2_43FAA	leucine rich repeat domain-containing protein	2664	F5_F8_type_C	PF00754.18	129	3.2e-65	213	50.7	2	8	2.3e-16	1.6e-15	52.3	0.5	2	129	304	431	303	431	0.94
gi|254517593|ref|ZP_05129649.1|N	Clostridium sp. 7_2_43FAA	leucine rich repeat domain-containing protein	2664	F5_F8_type_C	PF00754.18	129	3.2e-65	213	50.7	3	8	1.5e-09	1e-08	30.4	0.1	6	120	533	646	528	655	0.84
gi|254517593|ref|ZP_05129649.1|N	Clostridium sp. 7_2_43FAA	leucine rich repeat domain-containing protein	2664	F5_F8_type_C	PF00754.18	129	3.2e-65	213	50.7	4	8	7.2e-16	4.9e-15	50.8	2.1	2	129	750	877	749	877	0.93
gi|254517593|ref|ZP_05129649.1|N	Clostridium sp. 7_2_43FAA	leucine rich repeat domain-containing protein	2664	F5_F8_type_C	PF00754.18	129	3.2e-65	213	50.7	5	8	1.3e-15	9e-15	49.9	0.8	3	129	1779	1905	1777	1905	0.83
gi|254517593|ref|ZP_05129649.1|N	Clostridium sp. 7_2_43FAA	leucine rich repeat domain-containing protein	2664	F5_F8_type_C	PF00754.18	129	3.2e-65	213	50.7	6	8	9.9	67	-1.4	0.6	33	71	2008	2050	1991	2096	0.55
gi|254517593|ref|ZP_05129649.1|N	Clostridium sp. 7_2_43FAA	leucine rich repeat domain-containing protein	2664	F5_F8_type_C	PF00754.18	129	3.2e-65	213	50.7	7	8	1.1	7.3	1.7	1.6	63	95	2092	2129	2047	2138	0.75
gi|254517593|ref|ZP_05129649.1|N	Clostridium sp. 7_2_43FAA	leucine rich repeat domain-containing protein	2664	F5_F8_type_C	PF00754.18	129	3.2e-65	213	50.7	8	8	0.2	1.3	4.1	0	28	85	2371	2430	2354	2455	0.8
gi|228975707|ref|ZP_04136244.1|N	Bacillus thuringiensis serovar thuringiensis	Fibronectin type III domain protein	449	F5_F8_type_C	PF00754.18	129	1.1e-53	175.7	16.1	1	2	1.2e-28	7.9e-28	92.1	3	3	129	182	302	179	302	0.94
gi|228975707|ref|ZP_04136244.1|N	Bacillus thuringiensis serovar thuringiensis	Fibronectin type III domain protein	449	F5_F8_type_C	PF00754.18	129	1.1e-53	175.7	16.1	2	2	8.4e-28	5.7e-27	89.4	2.7	3	129	324	444	320	444	0.93
gi|228942778|ref|ZP_04105302.1|N	Bacillus thuringiensis serovar berliner	Fibronectin type III domain protein	479	F5_F8_type_C	PF00754.18	129	1.3e-53	175.5	16.1	1	2	1.3e-28	8.9e-28	92	3	3	129	212	332	209	332	0.94
gi|228942778|ref|ZP_04105302.1|N	Bacillus thuringiensis serovar berliner	Fibronectin type III domain protein	479	F5_F8_type_C	PF00754.18	129	1.3e-53	175.5	16.1	2	2	9.4e-28	6.4e-27	89.2	2.7	3	129	354	474	350	474	0.93
gi|229193822|ref|ZP_04320752.1|N	Bacillus cereus ATCC 10876	Fibronectin type III domain protein	719	F5_F8_type_C	PF00754.18	129	3.8e-52	170.7	20.5	1	3	1.6	11	1.1	0.1	35	85	70	129	55	163	0.81
gi|229193822|ref|ZP_04320752.1|N	Bacillus cereus ATCC 10876	Fibronectin type III domain protein	719	F5_F8_type_C	PF00754.18	129	3.8e-52	170.7	20.5	2	3	1.2e-28	8.5e-28	92	2.8	2	129	451	572	449	572	0.94
gi|229193822|ref|ZP_04320752.1|N	Bacillus cereus ATCC 10876	Fibronectin type III domain protein	719	F5_F8_type_C	PF00754.18	129	3.8e-52	170.7	20.5	3	3	1.5e-26	1e-25	85.3	3	3	129	594	714	590	714	0.92
gi|206973457|ref|ZP_03234378.1|N	Bacillus cereus AH1134	fibronectin type III domain protein	733	F5_F8_type_C	PF00754.18	129	4.7e-52	170.5	18.7	1	2	1.3e-28	8.7e-28	92	2.8	2	129	465	586	463	586	0.94
gi|206973457|ref|ZP_03234378.1|N	Bacillus cereus AH1134	fibronectin type III domain protein	733	F5_F8_type_C	PF00754.18	129	4.7e-52	170.5	18.7	2	2	1.5e-26	1e-25	85.3	3	3	129	608	728	604	728	0.92
gi|110801328|ref|YP_695519.1|N	Clostridium perfringens ATCC 13124	discoidin domain-containing protein	2142	F5_F8_type_C	PF00754.18	129	3.2e-47	154.8	21.7	1	3	6.8e-17	4.6e-16	54.1	0.9	2	129	72	201	71	201	0.93
gi|110801328|ref|YP_695519.1|N	Clostridium perfringens ATCC 13124	discoidin domain-containing protein	2142	F5_F8_type_C	PF00754.18	129	3.2e-47	154.8	21.7	2	3	1.6e-16	1.1e-15	52.9	1.6	3	129	297	421	294	421	0.92
gi|110801328|ref|YP_695519.1|N	Clostridium perfringens ATCC 13124	discoidin domain-containing protein	2142	F5_F8_type_C	PF00754.18	129	3.2e-47	154.8	21.7	3	3	6.7e-18	4.5e-17	57.3	1.6	2	129	519	646	518	646	0.94
gi|168205048|ref|ZP_02631053.1|N	Clostridium perfringens E str. JGS1987	discoidin domain protein	2156	F5_F8_type_C	PF00754.18	129	1e-46	153.2	25.7	1	4	2.3e-16	1.5e-15	52.4	1	2	129	72	201	71	201	0.93
gi|168205048|ref|ZP_02631053.1|N	Clostridium perfringens E str. JGS1987	discoidin domain protein	2156	F5_F8_type_C	PF00754.18	129	1e-46	153.2	25.7	2	4	6.3e-17	4.3e-16	54.2	2.1	3	129	297	421	294	421	0.93
gi|168205048|ref|ZP_02631053.1|N	Clostridium perfringens E str. JGS1987	discoidin domain protein	2156	F5_F8_type_C	PF00754.18	129	1e-46	153.2	25.7	3	4	8.7e-17	5.9e-16	53.7	2.8	2	129	519	646	518	646	0.94
gi|168205048|ref|ZP_02631053.1|N	Clostridium perfringens E str. JGS1987	discoidin domain protein	2156	F5_F8_type_C	PF00754.18	129	1e-46	153.2	25.7	4	4	1.4	9.2	1.4	0	52	108	884	946	878	959	0.71
gi|168211786|ref|ZP_02637411.1|N	Clostridium perfringens B str. ATCC 3626	discoidin domain protein	2156	F5_F8_type_C	PF00754.18	129	1.7e-46	152.5	21.9	1	3	9.7e-17	6.6e-16	53.6	0.7	2	129	72	201	71	201	0.93
gi|168211786|ref|ZP_02637411.1|N	Clostridium perfringens B str. ATCC 3626	discoidin domain protein	2156	F5_F8_type_C	PF00754.18	129	1.7e-46	152.5	21.9	2	3	2.4e-16	1.6e-15	52.3	1.1	7	129	301	421	293	421	0.9
gi|168211786|ref|ZP_02637411.1|N	Clostridium perfringens B str. ATCC 3626	discoidin domain protein	2156	F5_F8_type_C	PF00754.18	129	1.7e-46	152.5	21.9	3	3	6.7e-18	4.6e-17	57.3	1.6	2	129	519	646	518	646	0.94
gi|182625919|ref|ZP_02953684.1|N	Clostridium perfringens D str. JGS1721	discoidin domain protein	2156	F5_F8_type_C	PF00754.18	129	3.5e-46	151.5	27.2	1	5	8.1e-16	5.5e-15	50.6	1	2	129	72	201	71	201	0.93
gi|182625919|ref|ZP_02953684.1|N	Clostridium perfringens D str. JGS1721	discoidin domain protein	2156	F5_F8_type_C	PF00754.18	129	3.5e-46	151.5	27.2	2	5	9e-17	6.1e-16	53.7	1.6	3	129	297	421	294	421	0.92
gi|182625919|ref|ZP_02953684.1|N	Clostridium perfringens D str. JGS1721	discoidin domain protein	2156	F5_F8_type_C	PF00754.18	129	3.5e-46	151.5	27.2	3	5	6.7e-18	4.6e-17	57.3	1.6	2	129	519	646	518	646	0.94
gi|182625919|ref|ZP_02953684.1|N	Clostridium perfringens D str. JGS1721	discoidin domain protein	2156	F5_F8_type_C	PF00754.18	129	3.5e-46	151.5	27.2	4	5	1.4	9.6	1.3	0	52	108	884	946	878	959	0.71
gi|182625919|ref|ZP_02953684.1|N	Clostridium perfringens D str. JGS1721	discoidin domain protein	2156	F5_F8_type_C	PF00754.18	129	3.5e-46	151.5	27.2	5	5	4.9	33	-0.4	0	64	119	1836	1886	1812	1893	0.79
gi|169346923|ref|ZP_02865871.1|N	Clostridium perfringens C str. JGS1495	ABC transporter, permease protein	2156	F5_F8_type_C	PF00754.18	129	4.3e-46	151.2	26.9	1	5	6.8e-17	4.6e-16	54.1	0.9	2	129	72	201	71	201	0.93
gi|169346923|ref|ZP_02865871.1|N	Clostridium perfringens C str. JGS1495	ABC transporter, permease protein	2156	F5_F8_type_C	PF00754.18	129	4.3e-46	151.2	26.9	2	5	3e-16	2e-15	52	1.3	7	129	301	421	293	421	0.9
gi|169346923|ref|ZP_02865871.1|N	Clostridium perfringens C str. JGS1495	ABC transporter, permease protein	2156	F5_F8_type_C	PF00754.18	129	4.3e-46	151.2	26.9	3	5	6.7e-18	4.6e-17	57.3	1.6	2	129	519	646	518	646	0.94
gi|169346923|ref|ZP_02865871.1|N	Clostridium perfringens C str. JGS1495	ABC transporter, permease protein	2156	F5_F8_type_C	PF00754.18	129	4.3e-46	151.2	26.9	4	5	5.1	34	-0.5	0	53	108	885	946	881	954	0.65
gi|169346923|ref|ZP_02865871.1|N	Clostridium perfringens C str. JGS1495	ABC transporter, permease protein	2156	F5_F8_type_C	PF00754.18	129	4.3e-46	151.2	26.9	5	5	6.6	45	-0.9	0	64	119	1836	1886	1818	1893	0.78
gi|168212328|ref|ZP_02637953.1|N	Clostridium perfringens CPE str. F4969	discoidin domain protein	2156	F5_F8_type_C	PF00754.18	129	9.1e-46	150.1	24.3	1	4	9.7e-17	6.6e-16	53.6	0.7	2	129	72	201	71	201	0.93
gi|168212328|ref|ZP_02637953.1|N	Clostridium perfringens CPE str. F4969	discoidin domain protein	2156	F5_F8_type_C	PF00754.18	129	9.1e-46	150.1	24.3	2	4	2.4e-16	1.6e-15	52.3	1.1	7	129	301	421	293	421	0.9
gi|168212328|ref|ZP_02637953.1|N	Clostridium perfringens CPE str. F4969	discoidin domain protein	2156	F5_F8_type_C	PF00754.18	129	9.1e-46	150.1	24.3	3	4	2e-17	1.4e-16	55.8	1.9	2	129	519	646	518	646	0.93
gi|168212328|ref|ZP_02637953.1|N	Clostridium perfringens CPE str. F4969	discoidin domain protein	2156	F5_F8_type_C	PF00754.18	129	9.1e-46	150.1	24.3	4	4	6.7	46	-0.9	0	64	119	1836	1886	1820	1893	0.78
gi|168216089|ref|ZP_02641714.1|N	Clostridium perfringens NCTC 8239	discoidin domain protein	2142	F5_F8_type_C	PF00754.18	129	1.9e-45	149.1	23.1	1	3	1.2e-16	8.3e-16	53.3	0.7	4	129	74	201	71	201	0.92
gi|168216089|ref|ZP_02641714.1|N	Clostridium perfringens NCTC 8239	discoidin domain protein	2142	F5_F8_type_C	PF00754.18	129	1.9e-45	149.1	23.1	2	3	1.6e-16	1.1e-15	52.9	1.3	3	129	297	421	294	421	0.92
gi|168216089|ref|ZP_02641714.1|N	Clostridium perfringens NCTC 8239	discoidin domain protein	2142	F5_F8_type_C	PF00754.18	129	1.9e-45	149.1	23.1	3	3	4.2e-17	2.8e-16	54.8	1.4	2	129	519	646	518	646	0.94
gi|229100570|ref|ZP_04231422.1|N	Bacillus cereus Rock3-29	Fibronectin type III domain protein	612	F5_F8_type_C	PF00754.18	129	4.4e-29	96.2	6.4	1	2	4.5	30	-0.3	0	34	63	96	125	54	167	0.78
gi|229100570|ref|ZP_04231422.1|N	Bacillus cereus Rock3-29	Fibronectin type III domain protein	612	F5_F8_type_C	PF00754.18	129	4.4e-29	96.2	6.4	2	2	9.6e-30	6.5e-29	95.6	2.7	4	129	478	601	475	601	0.93
gi|229106954|ref|ZP_04237054.1|N	Bacillus cereus Rock3-28	Fibronectin type III domain protein	612	F5_F8_type_C	PF00754.18	129	4.4e-29	96.2	6.4	1	2	4.5	30	-0.3	0	34	63	96	125	54	167	0.78
gi|229106954|ref|ZP_04237054.1|N	Bacillus cereus Rock3-28	Fibronectin type III domain protein	612	F5_F8_type_C	PF00754.18	129	4.4e-29	96.2	6.4	2	2	9.6e-30	6.5e-29	95.6	2.7	4	129	478	601	475	601	0.93
gi|229119133|ref|ZP_04248460.1|N	Bacillus cereus Rock1-3	Fibronectin type III domain protein	612	F5_F8_type_C	PF00754.18	129	5.8e-29	95.8	6.9	1	2	3.6	25	0	0	31	63	91	125	51	167	0.74
gi|229119133|ref|ZP_04248460.1|N	Bacillus cereus Rock1-3	Fibronectin type III domain protein	612	F5_F8_type_C	PF00754.18	129	5.8e-29	95.8	6.9	2	2	9.6e-30	6.5e-29	95.6	2.7	4	129	478	601	475	601	0.93
gi|168217074|ref|ZP_02642699.1|N	Clostridium perfringens NCTC 8239	F5/8 type C domain protein	1687	F5_F8_type_C	PF00754.18	129	7.2e-29	95.5	14.8	1	3	5.8e-17	3.9e-16	54.3	1.2	1	129	75	206	75	206	0.92
gi|168217074|ref|ZP_02642699.1|N	Clostridium perfringens NCTC 8239	F5/8 type C domain protein	1687	F5_F8_type_C	PF00754.18	129	7.2e-29	95.5	14.8	2	3	1.1e-14	7.6e-14	46.9	0.7	1	128	300	427	300	428	0.93
gi|168217074|ref|ZP_02642699.1|N	Clostridium perfringens NCTC 8239	F5/8 type C domain protein	1687	F5_F8_type_C	PF00754.18	129	7.2e-29	95.5	14.8	3	3	3.1	21	0.2	0.2	57	85	1047	1077	1031	1097	0.66
gi|182624186|ref|ZP_02951972.1|N	Clostridium perfringens D str.	F5/8 type C domain protein	1687	F5_F8_type_C	PF00754.18	129	2.3e-28	93.8	17.9	1	3	5.8e-17	3.9e-16	54.3	1.2	1	129	75	206	75	206	0.92
gi|182624186|ref|ZP_02951972.1|N	Clostridium perfringens D str.	F5/8 type C domain protein	1687	F5_F8_type_C	PF00754.18	129	2.3e-28	93.8	17.9	2	3	4.5e-15	3.1e-14	48.2	0.7	1	128	300	427	300	428	0.93
gi|182624186|ref|ZP_02951972.1|N	Clostridium perfringens D str.	F5/8 type C domain protein	1687	F5_F8_type_C	PF00754.18	129	2.3e-28	93.8	17.9	3	3	3.1	21	0.2	0.2	57	85	1047	1077	1031	1097	0.66
gi|168209602|ref|ZP_02635227.1|N	Clostridium perfringens B str.	F5/8 type C domain protein	1688	F5_F8_type_C	PF00754.18	129	3.2e-28	93.4	17.6	1	3	2e-17	1.4e-16	55.8	1.3	1	129	75	206	75	206	0.92
gi|168209602|ref|ZP_02635227.1|N	Clostridium perfringens B str.	F5/8 type C domain protein	1688	F5_F8_type_C	PF00754.18	129	3.2e-28	93.4	17.6	2	3	2e-14	1.3e-13	46.1	0.6	1	128	300	427	300	428	0.93
gi|168209602|ref|ZP_02635227.1|N	Clostridium perfringens B str.	F5/8 type C domain protein	1688	F5_F8_type_C	PF00754.18	129	3.2e-28	93.4	17.6	3	3	3.1	21	0.2	0.2	57	85	1047	1077	1031	1097	0.66
gi|168213022|ref|ZP_02638647.1|N	Clostridium perfringens CPE str.	F5/8 type C domain protein	1687	F5_F8_type_C	PF00754.18	129	9.7e-28	91.8	18.7	1	3	5.8e-17	3.9e-16	54.3	1.2	1	129	75	206	75	206	0.92
gi|168213022|ref|ZP_02638647.1|N	Clostridium perfringens CPE str.	F5/8 type C domain protein	1687	F5_F8_type_C	PF00754.18	129	9.7e-28	91.8	18.7	2	3	1.1e-14	7.6e-14	46.9	0.7	1	128	300	427	300	428	0.93
gi|168213022|ref|ZP_02638647.1|N	Clostridium perfringens CPE str.	F5/8 type C domain protein	1687	F5_F8_type_C	PF00754.18	129	9.7e-28	91.8	18.7	3	3	3	21	0.2	0.2	57	85	1047	1077	1030	1097	0.66
gi|18310263|ref|NP_562197.1|N	Clostridium perfringens str. 13	hypothetical protein CPE1281	1687	F5_F8_type_C	PF00754.18	129	1.5e-27	91.2	19	1	3	8.3e-17	5.6e-16	53.8	1.4	1	129	75	206	75	206	0.92
gi|18310263|ref|NP_562197.1|N	Clostridium perfringens str. 13	hypothetical protein CPE1281	1687	F5_F8_type_C	PF00754.18	129	1.5e-27	91.2	19	2	3	1.1e-14	7.6e-14	46.9	0.7	1	128	300	427	300	428	0.93
gi|18310263|ref|NP_562197.1|N	Clostridium perfringens str. 13	hypothetical protein CPE1281	1687	F5_F8_type_C	PF00754.18	129	1.5e-27	91.2	19	3	3	3	21	0.2	0.2	57	85	1047	1077	1030	1097	0.66
gi|110798644|ref|YP_695932.1|N	Clostridium perfringens ATCC 13124	F5/8 type C domain-containing protein	1687	F5_F8_type_C	PF00754.18	129	2.1e-27	90.8	21.1	1	3	5.8e-17	3.9e-16	54.3	1.2	1	129	75	206	75	206	0.92
gi|110798644|ref|YP_695932.1|N	Clostridium perfringens ATCC 13124	F5/8 type C domain-containing protein	1687	F5_F8_type_C	PF00754.18	129	2.1e-27	90.8	21.1	2	3	4.5e-15	3.1e-14	48.2	0.7	1	128	300	427	300	428	0.93
gi|110798644|ref|YP_695932.1|N	Clostridium perfringens ATCC 13124	F5/8 type C domain-containing protein	1687	F5_F8_type_C	PF00754.18	129	2.1e-27	90.8	21.1	3	3	3	21	0.2	0.2	57	85	1047	1077	1030	1097	0.66
gi|228939033|ref|ZP_04101632.1|N	Bacillus thuringiensis serovar berliner	Fibronectin type III domain protein	337	F5_F8_type_C	PF00754.18	129	3e-27	90.3	5.1	1	1	7.9e-28	5.4e-27	89.4	3.5	2	129	211	332	209	332	0.94
gi|228907613|ref|ZP_04071470.1|N	Bacillus thuringiensis IBL 200	Fibronectin type III domain protein	577	F5_F8_type_C	PF00754.18	129	1.2e-26	88.4	5.2	1	2	5.5	38	-0.6	0.1	38	66	73	99	60	175	0.56
gi|228907613|ref|ZP_04071470.1|N	Bacillus thuringiensis IBL 200	Fibronectin type III domain protein	577	F5_F8_type_C	PF00754.18	129	1.2e-26	88.4	5.2	2	2	1.7e-27	1.2e-26	88.4	3.6	2	129	451	572	449	572	0.94
gi|228971914|ref|ZP_04132535.1|N	Bacillus thuringiensis serovar thuringiensis	Fibronectin type III domain protein	577	F5_F8_type_C	PF00754.18	129	1.5e-26	88	5.1	1	2	4.9	33	-0.4	0.2	35	64	70	104	38	172	0.67
gi|228971914|ref|ZP_04132535.1|N	Bacillus thuringiensis serovar thuringiensis	Fibronectin type III domain protein	577	F5_F8_type_C	PF00754.18	129	1.5e-26	88	5.1	2	2	2.2e-27	1.5e-26	88	3.5	2	129	451	572	449	572	0.94
gi|228978521|ref|ZP_04138897.1|N	Bacillus thuringiensis Bt407	Fibronectin type III domain protein	577	F5_F8_type_C	PF00754.18	129	1.5e-26	88	5.1	1	2	4.9	33	-0.4	0.2	35	64	70	104	38	172	0.67
gi|228978521|ref|ZP_04138897.1|N	Bacillus thuringiensis Bt407	Fibronectin type III domain protein	577	F5_F8_type_C	PF00754.18	129	1.5e-26	88	5.1	2	2	2.2e-27	1.5e-26	88	3.5	2	129	451	572	449	572	0.94
gi|229043676|ref|ZP_04191382.1|N	Bacillus cereus AH676	Fibronectin type III domain protein	577	F5_F8_type_C	PF00754.18	129	1.5e-26	88	5.1	1	2	4.9	33	-0.4	0.2	35	64	70	104	38	172	0.67
gi|229043676|ref|ZP_04191382.1|N	Bacillus cereus AH676	Fibronectin type III domain protein	577	F5_F8_type_C	PF00754.18	129	1.5e-26	88	5.1	2	2	2.2e-27	1.5e-26	88	3.5	2	129	451	572	449	572	0.94
gi|229109370|ref|ZP_04238966.1|N	Bacillus cereus Rock1-15	Fibronectin type III domain protein	577	F5_F8_type_C	PF00754.18	129	1.5e-26	88	5.1	1	2	4.9	33	-0.4	0.2	35	64	70	104	38	172	0.67
gi|229109370|ref|ZP_04238966.1|N	Bacillus cereus Rock1-15	Fibronectin type III domain protein	577	F5_F8_type_C	PF00754.18	129	1.5e-26	88	5.1	2	2	2.2e-27	1.5e-26	88	3.5	2	129	451	572	449	572	0.94
gi|218235736|ref|YP_002366602.1|N	Bacillus cereus B4264	S-layer domain protein	591	F5_F8_type_C	PF00754.18	129	1.5e-26	87.9	5.1	1	2	5.4	37	-0.6	0.2	35	64	84	118	57	186	0.66
gi|218235736|ref|YP_002366602.1|N	Bacillus cereus B4264	S-layer domain protein	591	F5_F8_type_C	PF00754.18	129	1.5e-26	87.9	5.1	2	2	2.3e-27	1.5e-26	87.9	3.5	2	129	465	586	463	586	0.94
gi|229173176|ref|ZP_04300725.1|N	Bacillus cereus MM3	Fibronectin type III domain protein	593	F5_F8_type_C	PF00754.18	129	1.8e-26	87.8	6.5	1	2	7.2	49	-1	0.2	36	63	85	112	58	184	0.7
gi|229173176|ref|ZP_04300725.1|N	Bacillus cereus MM3	Fibronectin type III domain protein	593	F5_F8_type_C	PF00754.18	129	1.8e-26	87.8	6.5	2	2	2.6e-27	1.8e-26	87.8	4.5	4	127	465	586	462	588	0.91
gi|229150123|ref|ZP_04278345.1|N	Bacillus cereus m1550	Fibronectin type III domain protein	577	F5_F8_type_C	PF00754.18	129	2.4e-26	87.3	5.3	1	2	5.1	35	-0.5	0.1	36	64	71	104	43	171	0.65
gi|229150123|ref|ZP_04278345.1|N	Bacillus cereus m1550	Fibronectin type III domain protein	577	F5_F8_type_C	PF00754.18	129	2.4e-26	87.3	5.3	2	2	3.6e-27	2.4e-26	87.3	3.7	2	129	451	572	449	572	0.94
gi|164687481|ref|ZP_02211509.1|N	Clostridium bartlettii DSM 16795	hypothetical protein CLOBAR_01122	2011	F5_F8_type_C	PF00754.18	129	2.4e-25	84.1	15.5	1	3	2e-11	1.4e-10	36.4	0.4	7	126	104	224	98	227	0.83
gi|164687481|ref|ZP_02211509.1|N	Clostridium bartlettii DSM 16795	hypothetical protein CLOBAR_01122	2011	F5_F8_type_C	PF00754.18	129	2.4e-25	84.1	15.5	2	3	5.7e-17	3.9e-16	54.3	1.2	2	129	1125	1254	1124	1254	0.89
gi|164687481|ref|ZP_02211509.1|N	Clostridium bartlettii DSM 16795	hypothetical protein CLOBAR_01122	2011	F5_F8_type_C	PF00754.18	129	2.4e-25	84.1	15.5	3	3	3	20	0.3	0.1	63	94	1440	1472	1422	1513	0.69
gi|153807570|ref|ZP_01960238.1|N	Bacteroides caccae ATCC 43185	hypothetical protein BACCAC_01850	958	F5_F8_type_C	PF00754.18	129	1.3e-21	72.1	0	1	1	5e-22	3.4e-21	70.7	0	3	129	233	359	231	359	0.93
gi|29348424|ref|NP_811927.1|N	Bacteroides thetaiotaomicron VPI-5482	hypothetical protein BT_3015	968	F5_F8_type_C	PF00754.18	129	2.2e-21	71.3	0.6	1	1	3.2e-22	2.2e-21	71.3	0.4	2	129	235	362	234	362	0.93
gi|257791565|ref|YP_003182171.1|N	Eggerthella lenta DSM	coagulation factor 5/8 type domain protein	1787	F5_F8_type_C	PF00754.18	129	3.7e-21	70.5	0.3	1	4	4.3	29	-0.3	0	92	128	388	421	377	427	0.69
gi|257791565|ref|YP_003182171.1|N	Eggerthella lenta DSM	coagulation factor 5/8 type domain protein	1787	F5_F8_type_C	PF00754.18	129	3.7e-21	70.5	0.3	2	4	9.6	66	-1.4	0.1	64	85	463	482	453	525	0.63
gi|257791565|ref|YP_003182171.1|N	Eggerthella lenta DSM	coagulation factor 5/8 type domain protein	1787	F5_F8_type_C	PF00754.18	129	3.7e-21	70.5	0.3	3	4	1.4e-05	9.7e-05	17.5	0	39	121	701	784	661	790	0.83
gi|257791565|ref|YP_003182171.1|N	Eggerthella lenta DSM	coagulation factor 5/8 type domain protein	1787	F5_F8_type_C	PF00754.18	129	3.7e-21	70.5	0.3	4	4	9.7e-15	6.6e-14	47.1	0	16	129	1503	1620	1490	1620	0.81
gi|253569212|ref|ZP_04846622.1|N	Bacteroides sp. 1_1_6	conserved hypothetical protein	956	F5_F8_type_C	PF00754.18	129	1.9e-20	68.3	0.4	1	1	2.8e-21	1.9e-20	68.3	0.3	2	129	223	350	222	350	0.94
gi|153807579|ref|ZP_01960247.1|N	Bacteroides caccae ATCC 43185	hypothetical protein BACCAC_01859	956	F5_F8_type_C	PF00754.18	129	1.6e-19	65.3	4.9	1	2	5.7e-20	3.9e-19	64	0.1	11	129	242	365	233	365	0.89
gi|153807579|ref|ZP_01960247.1|N	Bacteroides caccae ATCC 43185	hypothetical protein BACCAC_01859	956	F5_F8_type_C	PF00754.18	129	1.6e-19	65.3	4.9	2	2	0.91	6.2	1.9	0.2	65	97	856	890	842	906	0.7
gi|227538878|ref|ZP_03968927.1|N	Sphingobacterium spiritivorum ATCC 33300	conserved hypothetical protein	675	F5_F8_type_C	PF00754.18	129	2.6e-16	54.9	0.5	1	1	1.6e-16	1.1e-15	52.8	0.4	5	116	539	654	532	668	0.84
gi|110802272|ref|YP_698600.1|N	Clostridium perfringens SM101	leucine rich repeat domain-containing protein	1465	F5_F8_type_C	PF00754.18	129	3.2e-16	54.6	5.5	1	2	1.2e-16	8.3e-16	53.2	0.9	1	129	75	206	75	206	0.91
gi|110802272|ref|YP_698600.1|N	Clostridium perfringens SM101	leucine rich repeat domain-containing protein	1465	F5_F8_type_C	PF00754.18	129	3.2e-16	54.6	5.5	2	2	1.6	11	1.1	0.1	52	85	820	855	803	876	0.7
gi|241891227|ref|ZP_04778523.1|N	Sphingobacterium spiritivorum ATCC 33861	conserved hypothetical protein	675	F5_F8_type_C	PF00754.18	129	4.1e-16	54.2	0.7	1	1	2.4e-16	1.7e-15	52.3	0.5	5	116	539	654	530	668	0.84
gi|182626537|ref|ZP_02954286.1|N	Clostridium perfringens D str. JGS1721	putative antigenic protein NP1	1269	F5_F8_type_C	PF00754.18	129	5e-16	54	8.6	1	3	0.98	6.6	1.8	0.2	64	113	740	787	714	797	0.67
gi|182626537|ref|ZP_02954286.1|N	Clostridium perfringens D str. JGS1721	putative antigenic protein NP1	1269	F5_F8_type_C	PF00754.18	129	5e-16	54	8.6	2	3	3e-16	2e-15	52	1.5	11	117	816	933	810	945	0.84
gi|182626537|ref|ZP_02954286.1|N	Clostridium perfringens D str. JGS1721	putative antigenic protein NP1	1269	F5_F8_type_C	PF00754.18	129	5e-16	54	8.6	3	3	1.5	10	1.2	0	61	84	999	1023	986	1050	0.77
gi|210621328|ref|ZP_03292590.1|N	Clostridium hiranonis DSM 13275	hypothetical protein CLOHIR_00533	1937	F5_F8_type_C	PF00754.18	129	2.3e-15	51.8	23.5	1	4	0.14	0.98	4.5	0.8	72	119	341	393	273	404	0.69
gi|210621328|ref|ZP_03292590.1|N	Clostridium hiranonis DSM 13275	hypothetical protein CLOHIR_00533	1937	F5_F8_type_C	PF00754.18	129	2.3e-15	51.8	23.5	2	4	1e-08	7e-08	27.6	2.3	17	128	707	823	693	824	0.87
gi|210621328|ref|ZP_03292590.1|N	Clostridium hiranonis DSM 13275	hypothetical protein CLOHIR_00533	1937	F5_F8_type_C	PF00754.18	129	2.3e-15	51.8	23.5	3	4	4.9	34	-0.4	0	65	95	1473	1501	1466	1520	0.65
gi|210621328|ref|ZP_03292590.1|N	Clostridium hiranonis DSM 13275	hypothetical protein CLOHIR_00533	1937	F5_F8_type_C	PF00754.18	129	2.3e-15	51.8	23.5	4	4	2.8e-09	1.9e-08	29.4	1	3	120	1582	1749	1580	1757	0.82
gi|160914520|ref|ZP_02076735.1|N	Eubacterium dolichum DSM 3991	hypothetical protein EUBDOL_00526	1702	F5_F8_type_C	PF00754.18	129	2.7e-13	45.1	0.4	1	3	8	55	-1.1	0.3	64	99	495	527	480	540	0.67
gi|160914520|ref|ZP_02076735.1|N	Eubacterium dolichum DSM 3991	hypothetical protein EUBDOL_00526	1702	F5_F8_type_C	PF00754.18	129	2.7e-13	45.1	0.4	2	3	0.0053	0.036	9.2	0.1	15	110	603	709	583	727	0.69
gi|160914520|ref|ZP_02076735.1|N	Eubacterium dolichum DSM 3991	hypothetical protein EUBDOL_00526	1702	F5_F8_type_C	PF00754.18	129	2.7e-13	45.1	0.4	3	3	4e-14	2.7e-13	45.1	0.3	20	126	1434	1540	1418	1543	0.81
gi|266624902|ref|ZP_06117837.1|N	Clostridium hathewayi DSM	coagulation factor 5/8 type domain protein	1749	F5_F8_type_C	PF00754.18	129	9.5e-13	43.4	10.3	1	3	0.94	6.4	1.9	0	34	62	361	389	339	408	0.78
gi|266624902|ref|ZP_06117837.1|N	Clostridium hathewayi DSM	coagulation factor 5/8 type domain protein	1749	F5_F8_type_C	PF00754.18	129	9.5e-13	43.4	10.3	2	3	0.00021	0.0014	13.7	1.4	2	129	625	759	624	759	0.83
gi|266624902|ref|ZP_06117837.1|N	Clostridium hathewayi DSM	coagulation factor 5/8 type domain protein	1749	F5_F8_type_C	PF00754.18	129	9.5e-13	43.4	10.3	3	3	3.4e-09	2.3e-08	29.2	1	16	128	1460	1590	1447	1591	0.79
gi|153807502|ref|ZP_01960170.1|N	Bacteroides caccae ATCC 43185	hypothetical protein BACCAC_01782	951	F5_F8_type_C	PF00754.18	129	9.6e-13	43.3	0.3	1	1	4.5e-13	3e-12	41.7	0.2	3	123	233	350	231	356	0.88
gi|188590139|ref|YP_001920091.1|N	Clostridium botulinum E3 str.	fibronectin type III domain protein	1886	F5_F8_type_C	PF00754.18	129	3.4e-12	41.5	20.5	1	3	4.8	32	-0.4	0	35	58	509	532	502	549	0.71
gi|188590139|ref|YP_001920091.1|N	Clostridium botulinum E3 str.	fibronectin type III domain protein	1886	F5_F8_type_C	PF00754.18	129	3.4e-12	41.5	20.5	2	3	0.00051	0.0035	12.4	2.3	11	125	782	901	773	905	0.8
gi|188590139|ref|YP_001920091.1|N	Clostridium botulinum E3 str.	fibronectin type III domain protein	1886	F5_F8_type_C	PF00754.18	129	3.4e-12	41.5	20.5	3	3	5.5e-12	3.8e-11	38.2	1.4	15	104	1595	1690	1578	1721	0.74
gi|251780698|ref|ZP_04823618.1|N	Clostridium botulinum E1 str.	fibronectin type III domain protein	1872	F5_F8_type_C	PF00754.18	129	3.9e-12	41.4	22	1	3	2.7	19	0.4	0	34	59	494	519	488	535	0.75
gi|251780698|ref|ZP_04823618.1|N	Clostridium botulinum E1 str.	fibronectin type III domain protein	1872	F5_F8_type_C	PF00754.18	129	3.9e-12	41.4	22	2	3	0.0029	0.019	10	2.5	11	125	768	887	759	891	0.79
gi|251780698|ref|ZP_04823618.1|N	Clostridium botulinum E1 str.	fibronectin type III domain protein	1872	F5_F8_type_C	PF00754.18	129	3.9e-12	41.4	22	3	3	1.6e-12	1.1e-11	40	2.1	15	102	1581	1674	1564	1707	0.73
gi|154415304|ref|XP_001580677.1|N	Trichomonas vaginalis G3	hypothetical protein	988	F5_F8_type_C	PF00754.18	129	1.3e-11	39.7	9.9	1	3	0.00036	0.0025	12.9	0.1	43	128	3	87	1	88	0.87
gi|154415304|ref|XP_001580677.1|N	Trichomonas vaginalis G3	hypothetical protein	988	F5_F8_type_C	PF00754.18	129	1.3e-11	39.7	9.9	2	3	1.2e-09	8e-09	30.7	0.4	33	115	758	851	723	861	0.82
gi|154415304|ref|XP_001580677.1|N	Trichomonas vaginalis G3	hypothetical protein	988	F5_F8_type_C	PF00754.18	129	1.3e-11	39.7	9.9	3	3	2.7	18	0.4	0.2	65	97	863	891	855	911	0.7
gi|153807560|ref|ZP_01960228.1|N	Bacteroides caccae ATCC 43185	hypothetical protein BACCAC_01840	799	F5_F8_type_C	PF00754.18	129	1.4e-11	39.6	0.2	1	1	4.6e-12	3.1e-11	38.5	0.1	3	129	61	187	59	187	0.88
gi|153806970|ref|ZP_01959638.1|N	Bacteroides caccae ATCC 43185	hypothetical protein BACCAC_01246	800	F5_F8_type_C	PF00754.18	129	2.2e-11	39	1	1	2	1.1e-11	7.7e-11	37.2	0.1	3	128	149	280	147	281	0.81
gi|153806970|ref|ZP_01959638.1|N	Bacteroides caccae ATCC 43185	hypothetical protein BACCAC_01246	800	F5_F8_type_C	PF00754.18	129	2.2e-11	39	1	2	2	6.6	45	-0.8	0	92	116	437	461	403	488	0.77
gi|253564886|ref|ZP_04842342.1|N	Bacteroides sp. 3_2_5	conserved hypothetical protein	939	F5_F8_type_C	PF00754.18	129	2.1e-11	39	0.5	1	1	9.1e-12	6.2e-11	37.5	0.4	3	128	229	360	227	361	0.83
gi|265766160|ref|ZP_06094201.1|N	Bacteroides sp. 2_1_16	conserved hypothetical protein	939	F5_F8_type_C	PF00754.18	129	2.1e-11	39	0.5	1	1	9.1e-12	6.2e-11	37.5	0.4	3	128	229	360	227	361	0.83
gi|53714388|ref|YP_100380.1|N	Bacteroides fragilis YCH46	hypothetical protein BF3101	939	F5_F8_type_C	PF00754.18	129	2.1e-11	39	0.5	1	1	9.1e-12	6.2e-11	37.5	0.4	3	128	229	360	227	361	0.83
gi|60682409|ref|YP_212553.1|N	Bacteroides fragilis NCTC 9343	putative lipoprotein	939	F5_F8_type_C	PF00754.18	129	2.1e-11	39	0.5	1	1	9.1e-12	6.2e-11	37.5	0.4	3	128	229	360	227	361	0.83
gi|255010514|ref|ZP_05282640.1|N	Bacteroides fragilis 3_1_12	putative lipoprotein	932	F5_F8_type_C	PF00754.18	129	5.6e-11	37.6	2.2	1	1	9.8e-12	6.7e-11	37.4	0.2	3	128	222	353	220	354	0.85
gi|227540167|ref|ZP_03970216.1|N	Sphingobacterium spiritivorum ATCC 33300	conserved hypothetical protein	665	F5_F8_type_C	PF00754.18	129	6.4e-10	34.2	10.2	1	3	3	21	0.2	0	68	116	50	93	28	111	0.71
gi|227540167|ref|ZP_03970216.1|N	Sphingobacterium spiritivorum ATCC 33300	conserved hypothetical protein	665	F5_F8_type_C	PF00754.18	129	6.4e-10	34.2	10.2	2	3	1.2	8.2	1.5	0	44	62	309	327	298	366	0.7
gi|227540167|ref|ZP_03970216.1|N	Sphingobacterium spiritivorum ATCC 33300	conserved hypothetical protein	665	F5_F8_type_C	PF00754.18	129	6.4e-10	34.2	10.2	3	3	1.2e-10	7.9e-10	33.9	2.5	2	115	520	643	519	659	0.74
gi|253569977|ref|ZP_04847386.1|N	Bacteroides sp. 1_1_6	conserved hypothetical protein	857	F5_F8_type_C	PF00754.18	129	1.2e-09	33.3	0.1	1	1	7.3e-10	5e-09	31.3	0	3	129	141	266	139	266	0.81
gi|29349652|ref|NP_813155.1|N	Bacteroides thetaiotaomicron VPI-5482	hypothetical protein BT_4244	857	F5_F8_type_C	PF00754.18	129	1.2e-09	33.3	0.1	1	1	7.3e-10	5e-09	31.3	0	3	129	141	266	139	266	0.81
gi|154420390|ref|XP_001583210.1|N	Trichomonas vaginalis G3	F5/8 type C domain containing protein	1128	F5_F8_type_C	PF00754.18	129	2.5e-09	32.3	0.7	1	3	9.7	66	-1.4	0	44	90	25	67	7	83	0.57
gi|154420390|ref|XP_001583210.1|N	Trichomonas vaginalis G3	F5/8 type C domain containing protein	1128	F5_F8_type_C	PF00754.18	129	2.5e-09	32.3	0.7	2	3	4.9	34	-0.5	0	70	109	359	400	342	401	0.76
gi|154420390|ref|XP_001583210.1|N	Trichomonas vaginalis G3	F5/8 type C domain containing protein	1128	F5_F8_type_C	PF00754.18	129	2.5e-09	32.3	0.7	3	3	5.9e-09	4e-08	28.4	0	17	115	642	744	631	758	0.73
gi|153807091|ref|ZP_01959759.1|N	Bacteroides caccae ATCC 43185	hypothetical protein BACCAC_01368	937	F5_F8_type_C	PF00754.18	129	6.9e-09	30.9	0.8	1	2	1.4	9.6	1.3	0	27	60	56	90	36	107	0.73
gi|153807091|ref|ZP_01959759.1|N	Bacteroides caccae ATCC 43185	hypothetical protein BACCAC_01368	937	F5_F8_type_C	PF00754.18	129	6.9e-09	30.9	0.8	2	2	1.5e-08	1e-07	27.1	0.1	16	129	245	367	233	367	0.81
gi|241892215|ref|ZP_04779511.1|N	Sphingobacterium spiritivorum ATCC 33861	conserved hypothetical protein	665	F5_F8_type_C	PF00754.18	129	1e-08	30.3	11.6	1	3	3	21	0.2	0	68	116	50	93	28	111	0.71
gi|241892215|ref|ZP_04779511.1|N	Sphingobacterium spiritivorum ATCC 33861	conserved hypothetical protein	665	F5_F8_type_C	PF00754.18	129	1e-08	30.3	11.6	2	3	1.4	9.5	1.3	0	44	62	309	327	297	365	0.7
gi|241892215|ref|ZP_04779511.1|N	Sphingobacterium spiritivorum ATCC 33861	conserved hypothetical protein	665	F5_F8_type_C	PF00754.18	129	1e-08	30.3	11.6	3	3	1.7e-09	1.1e-08	30.2	3.5	3	115	521	643	519	659	0.74
gi|153807217|ref|ZP_01959885.1|N	Bacteroides caccae ATCC 43185	hypothetical protein BACCAC_01495	959	F5_F8_type_C	PF00754.18	129	4.1e-08	28.4	0.5	1	1	1.9e-08	1.3e-07	26.7	0.3	15	125	263	380	252	384	0.77
gi|253567674|ref|ZP_04845085.1|N	Bacteroides sp. 1_1_6	coagulation factor 5/8 type	705	F5_F8_type_C	PF00754.18	129	4.1e-08	28.4	0.6	1	1	1.5e-08	1e-07	27.1	0.4	6	123	548	680	543	684	0.82
gi|29345687|ref|NP_809190.1|N	Bacteroides thetaiotaomicron VPI-5482	hypothetical protein BT_0277	705	F5_F8_type_C	PF00754.18	129	4.1e-08	28.4	0.6	1	1	1.5e-08	1e-07	27.1	0.4	6	123	548	680	543	684	0.82
gi|255691954|ref|ZP_05415629.1|N	Bacteroides finegoldii DSM 17565	conserved hypothetical protein	705	F5_F8_type_C	PF00754.18	129	4.5e-08	28.3	2	1	1	6.9e-09	4.7e-08	28.2	0.2	15	116	549	669	537	689	0.74
gi|153807561|ref|ZP_01960229.1|N	Bacteroides caccae ATCC 43185	hypothetical protein BACCAC_01841	886	F5_F8_type_C	PF00754.18	129	9.3e-08	27.2	0.3	1	3	2	14	0.8	0	50	82	15	50	14	111	0.73
gi|153807561|ref|ZP_01960229.1|N	Bacteroides caccae ATCC 43185	hypothetical protein BACCAC_01841	886	F5_F8_type_C	PF00754.18	129	9.3e-08	27.2	0.3	2	3	1.4e-08	9.3e-08	27.2	0.2	7	128	140	265	133	266	0.76
gi|153807561|ref|ZP_01960229.1|N	Bacteroides caccae ATCC 43185	hypothetical protein BACCAC_01841	886	F5_F8_type_C	PF00754.18	129	9.3e-08	27.2	0.3	3	3	2	14	0.8	0.4	64	113	764	827	745	844	0.78
gi|145953279|ref|ZP_01802287.1|N	Clostridium difficile QCD-32g58	hypothetical protein CdifQ_04003262	834	F5_F8_type_C	PF00754.18	129	2.2e-07	26	9.4	1	2	2.5	17	0.5	0.1	48	119	348	426	341	436	0.74
gi|145953279|ref|ZP_01802287.1|N	Clostridium difficile QCD-32g58	hypothetical protein CdifQ_04003262	834	F5_F8_type_C	PF00754.18	129	2.2e-07	26	9.4	2	2	6.5e-08	4.4e-07	25	3.6	33	128	505	634	465	635	0.77
gi|153809164|ref|ZP_01961832.1|N	Bacteroides caccae ATCC 43185	hypothetical protein BACCAC_03474	857	F5_F8_type_C	PF00754.18	129	1.4e-06	23.4	0.2	1	1	5.8e-07	3.9e-06	22	0.2	17	128	147	260	133	261	0.76
gi|237732773|ref|ZP_04563254.1|N	Mollicutes bacterium D7	conserved hypothetical protein	1739	F5_F8_type_C	PF00754.18	129	1.5e-06	23.3	21	1	5	0.81	5.5	2.1	0.1	40	120	300	386	287	397	0.61
gi|237732773|ref|ZP_04563254.1|N	Mollicutes bacterium D7	conserved hypothetical protein	1739	F5_F8_type_C	PF00754.18	129	1.5e-06	23.3	21	2	5	9.2	62	-1.3	0.1	49	85	454	495	447	540	0.63
gi|237732773|ref|ZP_04563254.1|N	Mollicutes bacterium D7	conserved hypothetical protein	1739	F5_F8_type_C	PF00754.18	129	1.5e-06	23.3	21	3	5	6.6	45	-0.9	1.4	64	99	555	587	468	601	0.76
gi|237732773|ref|ZP_04563254.1|N	Mollicutes bacterium D7	conserved hypothetical protein	1739	F5_F8_type_C	PF00754.18	129	1.5e-06	23.3	21	4	5	0.011	0.077	8.1	0.5	16	128	648	764	636	765	0.75
gi|237732773|ref|ZP_04563254.1|N	Mollicutes bacterium D7	conserved hypothetical protein	1739	F5_F8_type_C	PF00754.18	129	1.5e-06	23.3	21	5	5	4.4e-07	3e-06	22.4	0.4	16	115	1458	1561	1444	1571	0.8
gi|167754747|ref|ZP_02426874.1|N	Clostridium ramosum DSM 1402	hypothetical protein CLORAM_00251	1739	F5_F8_type_C	PF00754.18	129	2.6e-06	22.5	21.1	1	5	0.82	5.6	2.1	0.1	40	120	300	386	288	397	0.6
gi|167754747|ref|ZP_02426874.1|N	Clostridium ramosum DSM 1402	hypothetical protein CLORAM_00251	1739	F5_F8_type_C	PF00754.18	129	2.6e-06	22.5	21.1	2	5	9.2	62	-1.3	0.1	49	85	454	495	447	540	0.63
gi|167754747|ref|ZP_02426874.1|N	Clostridium ramosum DSM 1402	hypothetical protein CLORAM_00251	1739	F5_F8_type_C	PF00754.18	129	2.6e-06	22.5	21.1	3	5	6.6	45	-0.9	1.4	64	99	555	587	468	601	0.76
gi|167754747|ref|ZP_02426874.1|N	Clostridium ramosum DSM 1402	hypothetical protein CLORAM_00251	1739	F5_F8_type_C	PF00754.18	129	2.6e-06	22.5	21.1	4	5	0.011	0.077	8.1	0.5	16	128	648	764	636	765	0.75
gi|167754747|ref|ZP_02426874.1|N	Clostridium ramosum DSM 1402	hypothetical protein CLORAM_00251	1739	F5_F8_type_C	PF00754.18	129	2.6e-06	22.5	21.1	5	5	6.5e-07	4.4e-06	21.8	0.5	16	115	1458	1561	1444	1571	0.8
gi|153809299|ref|ZP_01961967.1|N	Bacteroides caccae ATCC 43185	hypothetical protein BACCAC_03612	952	F5_F8_type_C	PF00754.18	129	8e-06	21	0	1	1	2.5e-06	1.7e-05	19.9	0	3	101	244	341	242	368	0.72
gi|167386304|ref|XP_001737701.1|N	Entamoeba dispar SAW760	antigenic protein NP1	1114	F5_F8_type_C	PF00754.18	129	1.5e-05	20.1	2.9	1	1	2.5e-06	1.7e-05	19.9	0.2	16	129	873	986	859	986	0.87
gi|153808286|ref|ZP_01960954.1|N	Bacteroides caccae ATCC 43185	hypothetical protein BACCAC_02574	796	F5_F8_type_C	PF00754.18	129	5e-05	18.4	0	1	1	1.6e-05	0.00011	17.3	0	16	129	86	201	76	201	0.82
gi|187735409|ref|YP_001877521.1|N	Akkermansia muciniphila ATCC BAA-835	hypothetical protein Amuc_0908	747	F5_F8_type_C	PF00754.18	129	6.4e-05	18.1	0.2	1	1	4.3e-05	0.00029	15.9	0	2	117	46	147	44	159	0.82
gi|153805921|ref|ZP_01958589.1|N	Bacteroides caccae ATCC 43185	hypothetical protein BACCAC_00161	977	F5_F8_type_C	PF00754.18	129	7.3e-05	17.9	0	1	2	0.00013	0.00087	14.4	0.1	10	112	244	353	236	369	0.74
gi|153805921|ref|ZP_01958589.1|N	Bacteroides caccae ATCC 43185	hypothetical protein BACCAC_00161	977	F5_F8_type_C	PF00754.18	129	7.3e-05	17.9	0	2	2	3.3	22	0.1	0	75	114	686	721	682	733	0.83
gi|153807100|ref|ZP_01959768.1|N	Bacteroides caccae ATCC 43185	hypothetical protein BACCAC_01377	973	F5_F8_type_C	PF00754.18	129	8.3e-05	17.7	0.1	1	1	7.2e-05	0.00049	15.2	0	15	114	246	350	238	366	0.73
gi|67478183|ref|XP_654508.1|N	Entamoeba histolytica HM-1:IMSS	immuno-dominant variable surface antigen	1113	F5_F8_type_C	PF00754.18	129	9.6e-05	17.5	0.3	1	1	5.4e-05	0.00037	15.6	0.2	16	129	872	985	863	985	0.81
gi|154497181|ref|ZP_02035877.1|N	Bacteroides capillosus ATCC 29799	hypothetical protein BACCAP_01474	1622	F5_F8_type_C	PF00754.18	129	0.00033	15.8	0.8	1	3	2.6	18	0.5	0	37	64	341	373	310	385	0.76
gi|154497181|ref|ZP_02035877.1|N	Bacteroides capillosus ATCC 29799	hypothetical protein BACCAP_01474	1622	F5_F8_type_C	PF00754.18	129	0.00033	15.8	0.8	2	3	5.6	38	-0.6	0.1	51	85	497	532	489	552	0.65
gi|154497181|ref|ZP_02035877.1|N	Bacteroides capillosus ATCC 29799	hypothetical protein BACCAP_01474	1622	F5_F8_type_C	PF00754.18	129	0.00033	15.8	0.8	3	3	4.8e-05	0.00033	15.8	0.6	20	128	616	724	603	725	0.8

## Sheet: Sequence counts
			Sequence	Counts
			gi|110798644|ref|YP_695932.1|N	3
Count of hit_seq			gi|110801328|ref|YP_695519.1|N	3
Row Labels	Total		gi|110802272|ref|YP_698600.1|N	2
gi|110798644|ref|YP_695932.1|N	3		gi|145953279|ref|ZP_01802287.1|N	2
gi|110801328|ref|YP_695519.1|N	3		gi|153805921|ref|ZP_01958589.1|N	2
gi|110802272|ref|YP_698600.1|N	2		gi|153806970|ref|ZP_01959638.1|N	2
gi|145953279|ref|ZP_01802287.1|N	2		gi|153807091|ref|ZP_01959759.1|N	2
gi|153805921|ref|ZP_01958589.1|N	2		gi|153807100|ref|ZP_01959768.1|N	1
gi|153806970|ref|ZP_01959638.1|N	2		gi|153807217|ref|ZP_01959885.1|N	1
gi|153807091|ref|ZP_01959759.1|N	2		gi|153807502|ref|ZP_01960170.1|N	1
gi|153807100|ref|ZP_01959768.1|N	1		gi|153807560|ref|ZP_01960228.1|N	1
gi|153807217|ref|ZP_01959885.1|N	1		gi|153807561|ref|ZP_01960229.1|N	3
gi|153807502|ref|ZP_01960170.1|N	1		gi|153807570|ref|ZP_01960238.1|N	1
gi|153807560|ref|ZP_01960228.1|N	1		gi|153807579|ref|ZP_01960247.1|N	2
gi|153807561|ref|ZP_01960229.1|N	3		gi|153808286|ref|ZP_01960954.1|N	1
gi|153807570|ref|ZP_01960238.1|N	1		gi|153809164|ref|ZP_01961832.1|N	1
gi|153807579|ref|ZP_01960247.1|N	2		gi|153809299|ref|ZP_01961967.1|N	1
gi|153808286|ref|ZP_01960954.1|N	1		gi|154415304|ref|XP_001580677.1|N	3
gi|153809164|ref|ZP_01961832.1|N	1		gi|154420390|ref|XP_001583210.1|N	3
gi|153809299|ref|ZP_01961967.1|N	1		gi|154497181|ref|ZP_02035877.1|N	3
gi|154415304|ref|XP_001580677.1|N	3		gi|160914520|ref|ZP_02076735.1|N	3
gi|154420390|ref|XP_001583210.1|N	3		gi|164687481|ref|ZP_02211509.1|N	3
gi|154497181|ref|ZP_02035877.1|N	3		gi|167386304|ref|XP_001737701.1|N	1
gi|160914520|ref|ZP_02076735.1|N	3		gi|167754747|ref|ZP_02426874.1|N	5
gi|164687481|ref|ZP_02211509.1|N	3		gi|168205048|ref|ZP_02631053.1|N	4
gi|167386304|ref|XP_001737701.1|N	1		gi|168209602|ref|ZP_02635227.1|N	3
gi|167754747|ref|ZP_02426874.1|N	5		gi|168211786|ref|ZP_02637411.1|N	3
gi|168205048|ref|ZP_02631053.1|N	4		gi|168212328|ref|ZP_02637953.1|N	4
gi|168209602|ref|ZP_02635227.1|N	3		gi|168213022|ref|ZP_02638647.1|N	3
gi|168211786|ref|ZP_02637411.1|N	3		gi|168216089|ref|ZP_02641714.1|N	3
gi|168212328|ref|ZP_02637953.1|N	4		gi|168217074|ref|ZP_02642699.1|N	3
gi|168213022|ref|ZP_02638647.1|N	3		gi|169346923|ref|ZP_02865871.1|N	5
gi|168216089|ref|ZP_02641714.1|N	3		gi|182624186|ref|ZP_02951972.1|N	3
gi|168217074|ref|ZP_02642699.1|N	3		gi|182625919|ref|ZP_02953684.1|N	5
gi|169346923|ref|ZP_02865871.1|N	5		gi|182626537|ref|ZP_02954286.1|N	3
gi|182624186|ref|ZP_02951972.1|N	3		gi|18310263|ref|NP_562197.1|N	3
gi|182625919|ref|ZP_02953684.1|N	5		gi|187735409|ref|YP_001877521.1|N	1
gi|182626537|ref|ZP_02954286.1|N	3		gi|188590139|ref|YP_001920091.1|N	3
gi|18310263|ref|NP_562197.1|N	3		gi|206973457|ref|ZP_03234378.1|N	2
gi|187735409|ref|YP_001877521.1|N	1		gi|210621328|ref|ZP_03292590.1|N	4
gi|188590139|ref|YP_001920091.1|N	3		gi|218235736|ref|YP_002366602.1|N	2
gi|206973457|ref|ZP_03234378.1|N	2		gi|227538878|ref|ZP_03968927.1|N	1
gi|210621328|ref|ZP_03292590.1|N	4		gi|227540167|ref|ZP_03970216.1|N	3
gi|218235736|ref|YP_002366602.1|N	2		gi|228907613|ref|ZP_04071470.1|N	2
gi|227538878|ref|ZP_03968927.1|N	1		gi|228939033|ref|ZP_04101632.1|N	1
gi|227540167|ref|ZP_03970216.1|N	3		gi|228942778|ref|ZP_04105302.1|N	2
gi|228907613|ref|ZP_04071470.1|N	2		gi|228971914|ref|ZP_04132535.1|N	2
gi|228939033|ref|ZP_04101632.1|N	1		gi|228975707|ref|ZP_04136244.1|N	2
gi|228942778|ref|ZP_04105302.1|N	2		gi|228978521|ref|ZP_04138897.1|N	2
gi|228971914|ref|ZP_04132535.1|N	2		gi|229043676|ref|ZP_04191382.1|N	2
gi|228975707|ref|ZP_04136244.1|N	2		gi|229100570|ref|ZP_04231422.1|N	2
gi|228978521|ref|ZP_04138897.1|N	2		gi|229106954|ref|ZP_04237054.1|N	2
gi|229043676|ref|ZP_04191382.1|N	2		gi|229109370|ref|ZP_04238966.1|N	2
gi|229100570|ref|ZP_04231422.1|N	2		gi|229119133|ref|ZP_04248460.1|N	2
gi|229106954|ref|ZP_04237054.1|N	2		gi|229150123|ref|ZP_04278345.1|N	2
gi|229109370|ref|ZP_04238966.1|N	2		gi|229173176|ref|ZP_04300725.1|N	2
gi|229119133|ref|ZP_04248460.1|N	2		gi|229193822|ref|ZP_04320752.1|N	3
gi|229150123|ref|ZP_04278345.1|N	2		gi|237732773|ref|ZP_04563254.1|N	5
gi|229173176|ref|ZP_04300725.1|N	2		gi|241891227|ref|ZP_04778523.1|N	1
gi|229193822|ref|ZP_04320752.1|N	3		gi|241892215|ref|ZP_04779511.1|N	3
gi|237732773|ref|ZP_04563254.1|N	5		gi|251780698|ref|ZP_04823618.1|N	3
gi|241891227|ref|ZP_04778523.1|N	1		gi|253564886|ref|ZP_04842342.1|N	1
gi|241892215|ref|ZP_04779511.1|N	3		gi|253567674|ref|ZP_04845085.1|N	1
gi|251780698|ref|ZP_04823618.1|N	3		gi|253569212|ref|ZP_04846622.1|N	1
gi|253564886|ref|ZP_04842342.1|N	1		gi|253569977|ref|ZP_04847386.1|N	1
gi|253567674|ref|ZP_04845085.1|N	1		gi|254517593|ref|ZP_05129649.1|N	8
gi|253569212|ref|ZP_04846622.1|N	1		gi|255010514|ref|ZP_05282640.1|N	1
gi|253569977|ref|ZP_04847386.1|N	1		gi|255691954|ref|ZP_05415629.1|N	1
gi|254517593|ref|ZP_05129649.1|N	8		gi|257791565|ref|YP_003182171.1|N	4
gi|255010514|ref|ZP_05282640.1|N	1		gi|265766160|ref|ZP_06094201.1|N	1
gi|255691954|ref|ZP_05415629.1|N	1		gi|266624902|ref|ZP_06117837.1|N	3
gi|257791565|ref|YP_003182171.1|N	4		gi|29345687|ref|NP_809190.1|N	1
gi|265766160|ref|ZP_06094201.1|N	1		gi|29348424|ref|NP_811927.1|N	1
gi|266624902|ref|ZP_06117837.1|N	3		gi|29349652|ref|NP_813155.1|N	1
gi|29345687|ref|NP_809190.1|N	1		gi|53714388|ref|YP_100380.1|N	1
gi|29348424|ref|NP_811927.1|N	1		gi|60682409|ref|YP_212553.1|N	1
gi|29349652|ref|NP_813155.1|N	1		gi|67478183|ref|XP_654508.1|N	1
gi|53714388|ref|YP_100380.1|N	1
gi|60682409|ref|YP_212553.1|N	1
gi|67478183|ref|XP_654508.1|N	1
(blank)
Grand Total	176
