# Supplementary material for: A Novel Extracellular Metallopeptidase Domain Shared by Animal Host-Associated Mutualistic and Pathogenic Microbes
Source: PLoS One. 2012 Jan 27;7(1):e30287. doi: 10.1371/journal.pone.0030287 (PMC3267712; doi:10.1371/journal.pone.0030287)
Supplement: Table S14 — PHOBIUS analysis for 141 MEROPS entries possessing CBM32 or CBM5_12. (XLSX) [file pone.0030287.s021.xlsx]

## Sheet: MEROPS_CBM5_12_phobius
SEQENCE ID	TMD or SP	TMD	SP	PREDICTION
MER095521N	1	0	Y	n9-21c30/31o
MER095523N	1	0	Y	n8-19c27/28o
MER035456N	1	0	Y	n3-13c31/32o
MER005608N	1	0	Y	n12-23c31/32o
MER005930N	1	0	Y	n11-26c44/45o
MER166461N	1	0	Y	n8-19c25/26o
MER084904N	1	0	Y	n6-13c19/20o
MER079291N	1	0	Y	n9-21c30/31o
MER019144N	1	0	Y	n13-24c29/30o
MER012276N	1	0	Y	n5-16c28/29o
MER012295N	1	0	Y	n5-16c28/29o
MER130921N	1	0	Y	n6-17c29/30o
MER000257N	1	0	Y	n10-28c46/47o
MER025431N	1	0	Y	n9-19c23/24o
MER113786N	1	0	Y	n5-16c28/29o
MER168555N	1	0	Y	n7-18c22/23o
MER161572N	1	0	Y	n2-12c17/18o
MER132999N	1	0	Y	n18-29c38/39o
MER062209N	1	0	Y	n10-21c28/29o
MER087218N	1	0	Y	n11-21c26/27o
MER020253N	1	0	Y	n11-26c44/45o
MER020254N	1	0	Y	n12-23c31/32o
MER050376N	1	0	Y	n6-24c30/31o
MER050428N	1	0	Y	n8-19c24/25o
MER027916N	1	0	Y	n6-13c19/20o
MER063148N	1	0	Y	n13-24c28/29o
MER028614N	1	0	Y	n6-24c29/30o
MER014088N	1	1	0	i12-34o
MER090875N	0	0	0	i
MER109103N	0	0	0	i
MER128349N	0	0	0	i

## Sheet: MEROPS_CBM32_phobius
SEQENCE ID	TMD or SP	TMD	SP	PREDICTION
MER171722N	1	12	Y	n4-15c23/24o1235-1253i1336-1355o1382-1403i1424-1444o1464-1482i1542-1562o1814-1833i1853-1871o1902-1922i1942-1964o1976-1994i2006-2026o
MER170172N	1	0	Y	n4-15c19/20o
MER110383N	1	0	Y	n12-23c27/28o
MER110510N	1	0	Y	n7-18c23/24o
MER110749N	1	0	Y	n3-10c15/16o
MER110750N	1	0	Y	n3-10c15/16o
MER110751N	1	0	Y	n3-10c15/16o
MER005410N	1	0	Y	n4-12c20/21o
MER153628N	1	0	Y	n8-19c27/28o
MER166461N	1	0	Y	n8-19c25/26o
MER078764N	1	0	Y	n10-20c25/26o
MER078930N	1	0	Y	n4-15c20/21o
MER142025N	1	0	Y	n7-18c23/24o
MER112886N	1	0	Y	n12-23c27/28o
MER112926N	1	0	Y	n2-13c18/19o
MER112978N	1	0	Y	n4-15c20/21o
MER112981N	1	0	Y	n4-15c20/21o
MER107159N	1	0	Y	n5-16c21/22o
MER107199N	1	0	Y	n2-12c20/21o
MER107964N	1	0	Y	n12-23c28/29o
MER113002N	1	0	Y	n4-15c20/21o
MER113009N	1	0	Y	n4-15c20/21o
MER113047N	1	0	Y	n10-20c25/26o
MER113078N	1	0	Y	n6-17c25/26o
MER101225N	1	0	Y	n4-15c20/21o
MER013404N	1	0	Y	n4-15c20/21o
MER101973N	1	0	Y	n3-11c16/17o
MER031475N	1	0	Y	n13-24c30/31o
MER056009N	1	0	Y	n8-19c29/30o
MER026949N	1	0	Y	n4-12c20/21o
MER026952N	1	0	Y	n10-20c25/26o
MER026953N	1	0	Y	n10-20c25/26o
MER026955N	1	0	Y	n9-20c25/26o
MER132312N	1	0	Y	n14-24c32/33o
MER069144N	1	0	Y	n3-14c19/20o
MER180002N	1	0	Y	n5-16c21/22o
MER092264N	1	0	Y	n2-13c18/19o
MER157412N	1	0	Y	n2-12c17/18o
MER150257N	1	0	Y	n15-27c32/33o
MER157692N	1	0	Y	n5-14c19/20o
MER187835N	1	0	Y	n8-19c27/28o
MER069983N	1	0	Y	n13-24c30/31o
MER087979N	1	0	Y	n3-12c17/18o
MER133114N	1	0	Y	n9-22c40/41o
MER103139N	1	0	Y	n7-18c23/24o
MER193494N	1	0	Y	n11-24c32/33o
MER193740N	1	0	Y	n10-21c29/30o
MER193785N	1	0	Y	n18-29c36/37o
MER193886N	1	0	Y	n6-21c29/30o
MER103668N	1	0	Y	n10-20c25/26o
MER193937N	1	0	Y	n4-15c20/21o
MER193938N	1	0	Y	n4-15c20/21o
MER193939N	1	0	Y	n4-15c20/21o
MER193940N	1	0	Y	n4-15c20/21o
MER193941N	1	0	Y	n4-15c20/21o
MER193942N	1	0	Y	n4-15c20/21o
MER188173N	1	0	Y	n2-12c17/18o
MER033830N	1	0	Y	n11-22c27/28o
MER003889N	1	0	Y	n9-20c25/26o
MER058667N	1	0	Y	n5-13c18/19o
MER028893N	1	0	Y	n10-21c29/30o
MER104098N	1	0	Y	n8-19c24/25o
MER104310N	1	0	Y	n4-15c20/21o
MER064375N	1	0	Y	n5-15c20/21o
MER004607N	1	0	Y	n4-22c27/28o
MER170048N	1	0	Y	n4-15c23/24o
MER165751N	1	7	0	o1394-1420i1432-1451o1463-1489i1501-1522o1542-1567i1588-1609o1615-1637i
MER167552N	1	7	0	o207-226i238-256o262-283i303-325o345-369i389-408o414-433i
MER176465N	1	3	0	o536-558i670-688o694-717i
MER170890N	1	1	0	o4321-4348i
MER170891N	1	1	0	o4321-4348i
MER071015N	1	1	0	i12-32o
MER157964N	1	1	0	o1171-1189i
MER110248N	0	0	0	i
MER110249N	0	0	0	i
MER110641N	0	0	0	i
MER110990N	0	0	0	i
MER148103N	0	0	0	i
MER111049N	0	0	0	i
MER111301N	0	0	0	i
MER111303N	0	0	0	i
MER111453N	0	0	0	i
MER111471N	0	0	0	i
MER111554N	0	0	0	i
MER106244N	0	0	0	i
MER106721N	0	0	0	i
MER106979N	0	0	0	i
MER112028N	0	0	0	i
MER112801N	0	0	0	i
MER112969N	0	0	0	i
MER112989N	0	0	0	i
MER160393N	0	0	0	i
MER107566N	0	0	0	i
MER107569N	0	0	0	i
MER107571N	0	0	0	i
MER107591N	0	0	0	i
MER013401N	0	0	0	i
MER098367N	0	0	0	i
MER098559N	0	0	0	i
MER102515N	0	0	0	i
MER069081N	0	0	0	i
MER069092N	0	0	0	i
MER002416N	0	0	0	i
MER157746N	0	0	0	i
MER180814N	0	0	0	i
MER175828N	0	0	0	i
MER163013N	0	0	0	i
MER103754N	0	0	0	i
MER188576N	0	0	0	i
MER104699N	0	0	0	i
