# Supplementary material for: A Novel Extracellular Metallopeptidase Domain Shared by Animal Host-Associated Mutualistic and Pathogenic Microbes
Source: PLoS One. 2012 Jan 27;7(1):e30287. doi: 10.1371/journal.pone.0030287 (PMC3267712; doi:10.1371/journal.pone.0030287)
Supplement: Table S15 — Table listing species and strains of selected bacterial genus that were present in the RefSeq database at the time of our analyses and the corresponding number of M60-like/PF13402 positive proteins: Bacillus , Bacteroides , Clostridium , Escherichia , Vibrio and Yersinia . Each genus is listed in a separate worksheet. Format: Excel file with six worksheets. (XLSX) [file pone.0030287.s022.xlsx]

## Sheet: Bacillus
Species/strains	PF13402 hits
Bacillus cereus Rock1-3	4
Bacillus thuringiensis serovar berliner ATCC 10792	4
Bacillus thuringiensis serovar thuringiensis str. T01001	4
Bacillus cereus AH1134	3
Bacillus cereus AH603	3
Bacillus cereus AH621	3
Bacillus cereus ATCC 10876	3
Bacillus cereus BDRD-ST196	3
Bacillus cereus Rock3-28	3
Bacillus cereus Rock3-29	3
Bacillus thuringiensis Bt407	3
Bacillus thuringiensis serovar israelensis ATCC 35646	3
Bacillus thuringiensis serovar monterrey BGSC 4AJ1	3
Bacillus weihenstephanensis KBAB4	3
Bacillus anthracis str. Kruger B	2
Bacillus cereus 172560W	2
Bacillus cereus 95/8201	2
Bacillus cereus AH676	2
Bacillus cereus AH820	2
Bacillus cereus B4264	2
Bacillus cereus F65185	2
Bacillus cereus G9842	2
Bacillus cereus m1550	2
Bacillus cereus MM3	2
Bacillus cereus Rock1-15	2
Bacillus cereus Rock4-2	2
Bacillus cereus W	2
Bacillus mycoides DSM 2048	2
Bacillus pseudomycoides DSM 12442	2
Bacillus thuringiensis IBL 200	2
Bacillus thuringiensis IBL 4222	2
Bacillus thuringiensis serovar huazhongensis BGSC 4BD1	2
Bacillus thuringiensis serovar kurstaki str. T03a001	2
Bacillus thuringiensis serovar pondicheriensis BGSC 4BA1	2
Bacillus thuringiensis serovar sotto str. T04001	2
Bacillus anthracis str. 'Ames Ancestor'	1
Bacillus anthracis str. A1055	1
Bacillus anthracis str. A2012	1
Bacillus anthracis str. Ames	1
Bacillus anthracis str. Australia 94	1
Bacillus anthracis str. CDC 684	1
Bacillus anthracis str. CNEVA-9066	1
Bacillus anthracis str. Sterne	1
Bacillus anthracis str. Vollum	1
Bacillus anthracis str. Western North America USA6153	1
Bacillus cereus 03BB102	1
Bacillus cereus 03BB108	1
Bacillus cereus AH1271	1
Bacillus cereus AH187	1
Bacillus cereus ATCC 10987	1
Bacillus cereus ATCC 14579	1
Bacillus cereus ATCC 4342	1
Bacillus cereus BDRD-Cer4	1
Bacillus cereus BDRD-ST24	1
Bacillus cereus BDRD-ST26	1
Bacillus cereus BGSC 6E1	1
Bacillus cereus E33L	1
Bacillus cereus G9241	1
Bacillus cereus H3081.97	1
Bacillus cereus m1293	1
Bacillus cereus NVH0597-99	1
Bacillus cereus Q1	1
Bacillus cereus R309803	1
Bacillus cereus Rock3-42	1
Bacillus cereus subsp. cytotoxis NVH 391-98	1
Bacillus mycoides Rock3-17	1
Bacillus thuringiensis serovar konkukian str. 97-27	1
Bacillus thuringiensis serovar pakistani str. T13001	1
Bacillus thuringiensis serovar pulsiensis BGSC 4CC1	1
Bacillus thuringiensis serovar tochigiensis BGSC 4Y1	1
Bacillus thuringiensis str. Al Hakam	1
Bacillus amyloliquefaciens FZB42
Bacillus anthracis
Bacillus anthracis str. A0174
Bacillus anthracis str. A0193
Bacillus anthracis str. A0248
Bacillus anthracis str. A0389
Bacillus anthracis str. A0442
Bacillus anthracis str. A0465
Bacillus anthracis str. A0488
Bacillus anthracis Tsiankovskii-I
Bacillus cellulosilyticus DSM 2522
Bacillus cereus
Bacillus cereus AH1272
Bacillus cereus AH1273
Bacillus cereus Rock3-44
Bacillus cereus Rock4-18
Bacillus clausii KSM-K16
Bacillus coagulans
Bacillus coagulans 36D1
Bacillus coahuilensis m4-4
Bacillus halodurans C-125
Bacillus licheniformis
Bacillus licheniformis ATCC 14580
Bacillus megaterium
Bacillus methanolicus
Bacillus mycoides
Bacillus mycoides Rock1-4
Bacillus pumilus
Bacillus pumilus ATCC 7061
Bacillus pumilus SAFR-032
Bacillus selenitireducens MLS10
Bacillus sp. B-3
Bacillus sp. B14905
Bacillus sp. NRRL B-14911
Bacillus sp. SG-1
Bacillus subtilis
Bacillus subtilis subsp. subtilis str. 168
Bacillus subtilis subsp. subtilis str. JH642
Bacillus subtilis subsp. subtilis str. NCIB 3610
Bacillus subtilis subsp. subtilis str. SMY
Bacillus thuringiensis
Bacillus thuringiensis phage GIL16c
Bacillus thuringiensis serovar andalousiensis BGSC 4AW1
Bacillus thuringiensis serovar darmstadiensis
Bacillus thuringiensis serovar entomocidus
Bacillus thuringiensis serovar israelensis
Bacillus thuringiensis serovar kurstaki
Bacillus thuringiensis serovar kurstaki str. YBT-1520
Bacillus thuringiensis serovar tenebrionis
Bacillus thuringiensis serovar thuringiensis

## Sheet: Bacteroides
Species-strains	PF13402 Hits
Bacteroides caccae ATCC 43185	16
Bacteroides sp. 1_1_6	4
Bacteroides thetaiotaomicron VPI-5482	4
Bacteroides plebeius DSM 17135	2
Bacteroides capillosus ATCC 29799	1
Bacteroides coprophilus DSM 18228	1
Bacteroides finegoldii DSM 17565	1
Bacteroides fragilis 3_1_12	1
Bacteroides fragilis NCTC 9343	1
Bacteroides fragilis YCH46	1
Bacteroides sp. 2_1_16	1
Bacteroides sp. 3_2_5	1
Bacteroides sp. D2	1
Bacteroides vulgatus ATCC 8482	1
Bacteroides cellulosilyticus DSM 14838
Bacteroides coprocola DSM 17136
Bacteroides dorei DSM 17855
Bacteroides eggerthii DSM 20697
Bacteroides fragilis
Bacteroides intestinalis DSM 17393
Bacteroides ovatus ATCC 8483
Bacteroides pectinophilus ATCC 43243
Bacteroides phage B40-8
Bacteroides sp. 2_1_22
Bacteroides sp. 2_1_33B
Bacteroides sp. 2_1_7
Bacteroides sp. 2_2_4
Bacteroides sp. 3_1_33FAA
Bacteroides sp. 4_3_47FAA
Bacteroides sp. 9_1_42FAA
Bacteroides sp. D1
Bacteroides sp. D20
Bacteroides sp. D4
Bacteroides stercoris ATCC 43183
Bacteroides uniformis
Bacteroides uniformis ATCC 8492

## Sheet: Clostridium
Species-strains	PF13402 Hits
Clostridium perfringens D str. JGS1721	4
Clostridium bartlettii DSM 16795	2
Clostridium perfringens ATCC 13124	2
Clostridium perfringens B str. ATCC 3626	2
Clostridium perfringens CPE str. F4969	2
Clostridium perfringens NCTC 8239	2
Clostridium botulinum E1 str. 'BoNT E Beluga'	1
Clostridium botulinum E3 str. Alaska E43	1
Clostridium difficile QCD-32g58	1
Clostridium hathewayi DSM 13479	1
Clostridium hiranonis DSM 13275	1
Clostridium perfringens C str. JGS1495	1
Clostridium perfringens E str. JGS1987	1
Clostridium perfringens SM101	1
Clostridium perfringens str. 13	1
Clostridium ramosum DSM 1402	1
Clostridium sp. 7_2_43FAA	1
Clostridium acetobutylicum ATCC 824
Clostridium asparagiforme DSM 15981
Clostridium beijerinckii NCIMB 8052
Clostridium bolteae ATCC BAA-613
Clostridium botulinum
Clostridium botulinum A2 str. Kyoto
Clostridium botulinum A3 str. Loch Maree
Clostridium botulinum A str. ATCC 19397
Clostridium botulinum A str. ATCC 3502
Clostridium botulinum A str. Hall
Clostridium botulinum B1 str. Okra
Clostridium botulinum Ba4 str. 657
Clostridium botulinum Bf
Clostridium botulinum B str. Eklund 17B
Clostridium botulinum C str. Eklund
Clostridium botulinum D str. 1873
Clostridium botulinum F str. Langeland
Clostridium botulinum NCTC 2916
Clostridium butyricum
Clostridium butyricum 5521
Clostridium butyricum E4 str. BoNT E BL5262
Clostridium carboxidivorans P7
Clostridium cellulolyticum H10
Clostridium cellulovorans 743B
Clostridium difficile
Clostridium difficile 630
Clostridium difficile ATCC 43255
Clostridium difficile CD196
Clostridium difficile CIP 107932
Clostridium difficile QCD-23m63
Clostridium difficile QCD-37x79
Clostridium difficile QCD-63q42
Clostridium difficile QCD-66c26
Clostridium difficile QCD-76w55
Clostridium difficile QCD-97b34
Clostridium difficile R20291
Clostridium hylemonae DSM 15053
Clostridium kluyveri DSM 555
Clostridium kluyveri NBRC 12016
Clostridium leptum DSM 753
Clostridium methylpentosum DSM 5476
Clostridium nexile DSM 1787
Clostridium novyi NT
Clostridium papyrosolvens DSM 2782
Clostridium perfringens
Clostridium phage 39-O
Clostridium phage c-st
Clostridium phage D-1873
Clostridium phage phi3626
Clostridium phage phiC2
Clostridium phage phi CD119
Clostridium phage phiCD27
Clostridium phage phiSM101
Clostridium phytofermentans ISDg
Clostridium scindens ATCC 35704
Clostridium spiroforme DSM 1552
Clostridium sp. L2-50
Clostridium sp. M62/1
Clostridium sp. MCF-1
Clostridium sporogenes ATCC 15579
Clostridium sp. SS2/1
Clostridium tetani E88
Clostridium thermocellum ATCC 27405
Clostridium thermocellum DSM 2360
Clostridium thermocellum JW20

## Sheet: Escherichia
Species-strains	PF13402 Hit	Pathogenic taxon
Escherichia albertii TW07627	1	Possibly - isolated from cases of diarrhea
Escherichia coli 101-1	1	Enteroaggregative E. coli (EAEC)
Escherichia coli 536	1	Uropathogenic E. coli (UPEC)
Escherichia coli 53638	1	Enterotoxigenic E. coli (EIEC)
Escherichia coli 55989	1	?
Escherichia coli 83972	1	?
Escherichia coli APEC O1	1	Avian pathogen (APEC)
Escherichia coli B str. REL606	1	?
Escherichia coli B7A	1	Enterotoxigenic E. coli (ETEC)
Escherichia coli BL21(DE3)	1	Lab strain
Escherichia coli BW2952	1	?
Escherichia coli E110019	1	Atypical Enteropathogenic E. coli (EPEC)
Escherichia coli E22	1	Enteropathogenic E. coli (EPEC)
Escherichia coli E24377A	1	Enterotoxigenic E. coli (ETEC)
Escherichia coli ED1a	1	?
Escherichia coli F11	1	Uropathogenic E. coli (UPEC)
Escherichia coli HS	1	?
Escherichia coli IAI1	1	?
Escherichia coli IAI39	1	?
Escherichia coli O111:H- str. 11128	1	?
Escherichia coli O127:H6 str. E2348/69	1	?
Escherichia coli S88	1	?
Escherichia coli SE11	1	?
Escherichia coli SMS-3-5	1	?
Escherichia coli str. K-12 substr. MG1655	1	?
Escherichia coli str. K-12 substr. W3110	1	?
Escherichia coli UMN026	1	?
Escherichia coli UTI89	1	Uropathogenic E. coli (UPEC)
Escherichia fergusonii ATCC 35469	1	?
Escherichia sp. 1_1_43	1	?
Escherichia sp. 3_2_53FAA	1	?
Escherichia sp. 4_1_40B	1	?
Escherichia coli		?
Escherichia coli 1520		?
Escherichia coli ATCC 8739		?
Escherichia coli B171		?
Escherichia coli CFT073		?
Escherichia coli ETEC H10407		?
Escherichia coli O103:H2 str. 12009		?
Escherichia coli O157:H7 EDL933		?
Escherichia coli O157:H7 str. EC4024		?
Escherichia coli O157:H7 str. EC4042		?
Escherichia coli O157:H7 str. EC4045		?
Escherichia coli O157:H7 str. EC4076		?
Escherichia coli O157:H7 str. EC4113		?
Escherichia coli O157:H7 str. EC4115		?
Escherichia coli O157:H7 str. EC4196		?
Escherichia coli O157:H7 str. EC4206		?
Escherichia coli O157:H7 str. EC4401		?
Escherichia coli O157:H7 str. EC4486		?
Escherichia coli O157:H7 str. EC4501		?
Escherichia coli O157:H7 str. EC508		?
Escherichia coli O157:H7 str. EC869		?
Escherichia coli O157:H7 str. FRIK2000		?
Escherichia coli O157:H7 str. FRIK966		?
Escherichia coli O157:H7 str. Sakai		?
Escherichia coli O157:H7 str. TW14359		?
Escherichia coli O157:H7 str. TW14588		?
Escherichia coli O26:H-		?
Escherichia coli O26:H11 str. 11368		?
Escherichia coli str. K-12 substr. DH10B		?
Escherichia coli Vir68		?
Escherichia coli W		?
Escherichia sp. Sflu5		?

## Sheet: Vibrio
Species-strains	PF13402 Hits
Vibrio cholerae B33	2
Vibrio cholerae MZO-3	2
Vibrio cholerae TMA 21	2
Vibrio cholerae V51	2
Vibrio mimicus VM573	2
Vibrio parahaemolyticus AQ3810	2
Vibrio parahaemolyticus AQ4037	2
Vibrio parahaemolyticus K5030	2
Vibrio parahaemolyticus Peru-466	2
Vibrio parahaemolyticus RIMD 2210633	2
Vibrio sp. Ex25	2
Vibrio sp. MED222	2
Vibrio vulnificus CMCP6	2
Vibrio alginolyticus 12G01	1
Vibrio alginolyticus 40B	1
Vibrio cholera CIRS 101	1
Vibrio cholerae 1587	1
Vibrio cholerae 2740-80	1
Vibrio cholerae 623-39	1
Vibrio cholerae AM-19226	1
Vibrio cholerae bv. albensis VL426	1
Vibrio cholerae BX 330286	1
Vibrio cholerae INDRE 91/1	1
Vibrio cholerae M66-2	1
Vibrio cholerae MAK 757	1
Vibrio cholerae MJ-1236	1
Vibrio cholerae MO10	1
Vibrio cholerae NCTC 8457	1
Vibrio cholerae O1 biovar El Tor str. N16961	1
Vibrio cholerae O395	1
Vibrio cholerae RC385	1
Vibrio cholerae RC9	1
Vibrio cholerae V52	1
Vibrio fischeri ES114	1
Vibrio fischeri MJ11	1
Vibrio harveyi 1DA3	1
Vibrio harveyi HY01	1
Vibrio mimicus MB-451	1
Vibrio mimicus VM223	1
Vibrio mimicus VM603	1
Vibrio orientalis CIP 102891	1
Vibrio parahaemolyticus 16	1
Vibrio parahaemolyticus AN-5034	1
Vibrio sp. RC586	1
Vibrio splendidus LGP32	1
Vibrio vulnificus YJ016	1
Vibrionales bacterium SWAT-3	1
Vibrio alginolyticus
Vibrio angustum S14
Vibrio cholerae
Vibrio cholerae 12129(1)
Vibrio cholerae CT 5369-93
Vibrio cholerae MZO-2
Vibrio cholerae RC27
Vibrio cholerae TM 11079-80
Vibrio coralliilyticus ATCC BAA-450
Vibrio fluvialis
Vibrio furnissii CIP 102972
Vibrio harveyi ATCC BAA-1116
Vibrio metschnikovii CIP 69.14
Vibrio nigripulchritudo
Vibrio parahaemolyticus
Vibrio shilonii
Vibrio shilonii AK1
Vibrio sp. 09022
Vibrio sp. 0908
Vibrio sp. 23023
Vibrio sp. 41
Vibrio sp. AND4
Vibrio sp. RC341
Vibrio sp. TC68
Vibrio splendidus 12B01
Vibrio tapetis
Vibrio vulnificus

## Sheet: Yersinia
Species-strains	PF13402 Hits
Yersinia aldovae ATCC 35236	1
Yersinia enterocolitica subsp. enterocolitica 8081	1
Yersinia mollaretii ATCC 43969	1
Yersinia ruckeri ATCC 29473	1
Yersinia pestis biovar Antiqua str. B42003004
Yersinia pestis Nepal516
Yersinia pestis Angola
Yersinia pestis biovar Antiqua str. E1979001
Yersinia pestis biovar Antiqua str. UG05-0454
Yersinia pestis biovar Mediaevalis str. K1973002
Yersinia pestis biovar Microtus str. 91001
Yersinia pestis biovar Orientalis str. India 195
Yersinia pestis biovar Orientalis str. IP275
Yersinia pestis biovar Orientalis str. MG05-1020
Yersinia pestis biovar Orientalis str. PEXU2
Yersinia pestis CA88-4125
Yersinia pestis CO92
Yersinia pestis FV-1
Yersinia pestis Pestoides A
Yersinia pseudotuberculosis YPIII
Yersinia bercovieri ATCC 43970
Yersinia enterocolitica
Yersinia frederiksenii ATCC 33641
Yersinia intermedia ATCC 29909
Yersinia kristensenii ATCC 33638
Yersinia pestis
Yersinia pestis Antiqua
Yersinia pestis biovar Orientalis str. F1991016
Yersinia pestis KIM
Yersinia pestis KIM D27
Yersinia pestis Pestoides F
Yersinia pseudotuberculosis
Yersinia pseudotuberculosis IP 31758
Yersinia pseudotuberculosis IP 32953
Yersinia pseudotuberculosis PB1/+
Yersinia rohdei ATCC 43380
Yersinia ruckeri
